# Supplementary material for: Transcriptional (ChIP-Chip) Analysis of ELF1, ETS2, RUNX1 and STAT5 in Human Abdominal Aortic Aneurysm
Source: Int J Mol Sci. 2015 May 18;16(5):11229–58. doi: 10.3390/ijms160511229 (PMC4463698; doi:10.3390/ijms160511229)
Supplement: Supplementary file 1 [file ijms-16-11229-s001.xlsx]

## Sheet: Table S1
Table S1. List of chers identified in human AAA or control aorta after chromatin-immunoprecipitation with antibodies against transcription factors ELF1, ETS2, RUNX1 and STAT5.
Cher ID	Class	Chromosome	Cher Start Position	Cher End Position	Antibody	maxLevel	Score	Gene Symbol	Entrez ID	Ensembl ID	Gene Start Postion	Gene End Position	Strand	Gene Biotype	Description
AML1.Control-6.smooth.chr10.cher1	Control	10	4863054	4864654	AML1.Control-6 smooth	1.26173	3.32435	AKR1E2	83592	ENSG00000165568	4828820	4890254	1	protein_coding	aldo-keto reductase family 1, member E2 [Source:HGNC Symbol;Acc:23437]
AML1.Control-6.smooth.chr10.cher2	Control	10	7627070	7627589	AML1.Control-6 smooth	1.00476	0.116014	ITIH5	80760	ENSG00000123243	7601232	7708961	-1	protein_coding	inter-alpha-trypsin inhibitor heavy chain family, member 5 [Source:HGNC Symbol;Acc:21449]
AML1.Control-6.smooth.chr10.cher3	Control	10	12112822	12113318	AML1.Control-6 smooth	1.28874	1.63748	DHTKD1	55526	ENSG00000181192	12110971	12165224	1	protein_coding	dehydrogenase E1 and transketolase domain containing 1 [Source:HGNC Symbol;Acc:23537]
AML1.Control-6.smooth.chr10.cher4	Control	10	12242960	12243452	AML1.Control-6 smooth	1.07822	0.257503	NUDT5	11164	ENSG00000165609	12207324	12238143	-1	protein_coding	nudix (nucleoside diphosphate linked moiety X)-type motif 5 [Source:HGNC Symbol;Acc:8052]
AML1.Control-6.smooth.chr10.cher4	Control	10	12242960	12243452	AML1.Control-6 smooth	1.07822	0.257503	CDC123	8872	ENSG00000151465	12237964	12292588	1	protein_coding	cell division cycle 123 homolog (S. cerevisiae) [Source:HGNC Symbol;Acc:16827]
AML1.Control-6.smooth.chr10.cher5	Control	10	14814448	14815034	AML1.Control-6 smooth	1.07657	0.576263	FAM107B	83641	ENSG00000065809	14560556	14816896	-1	protein_coding	family with sequence similarity 107, member B [Source:HGNC Symbol;Acc:23726]
AML1.Control-6.smooth.chr10.cher6	Control	10	14821224	14821706	AML1.Control-6 smooth	1.3742	2.34038	FAM107B	83641	ENSG00000065809	14560556	14816896	-1	protein_coding	family with sequence similarity 107, member B [Source:HGNC Symbol;Acc:23726]
AML1.Control-6.smooth.chr10.cher7	Control	10	14918586	14919206	AML1.Control-6 smooth	1.18988	0.845547	SUV39H2	79723	ENSG00000152455	14920819	14946314	1	protein_coding	suppressor of variegation 3-9 homolog 2 (Drosophila) [Source:HGNC Symbol;Acc:17287]
AML1.Control-6.smooth.chr10.cher8	Control	10	16566254	16566738	AML1.Control-6 smooth	1.13629	0.646756	C1QL3	389941	ENSG00000165985	16555742	16564004	-1	protein_coding	complement component 1, q subcomponent-like 3 [Source:HGNC Symbol;Acc:19359]
AML1.Control-6.smooth.chr10.cher9	Control	10	18242456	18243148	AML1.Control-6 smooth	1.39287	1.87094	SLC39A12	221074	ENSG00000148482	18240768	18332221	1	protein_coding	solute carrier family 39 (zinc transporter), member 12 [Source:HGNC Symbol;Acc:20860]
AML1.Control-6.smooth.chr10.cher10	Control	10	26501320	26502150	AML1.Control-6 smooth	1.51165	3.52323	GAD2	2572	ENSG00000136750	26505236	26593487	1	protein_coding	glutamate decarboxylase 2 (pancreatic islets and brain, 65kDa) [Source:HGNC Symbol;Acc:4093]
AML1.Control-6.smooth.chr10.cher11	Control	10	27705082	27705848	AML1.Control-6 smooth	1.47851	2.57458	PTCHD3	374308	ENSG00000182077	27687116	27703297	-1	protein_coding	patched domain containing 3 [Source:HGNC Symbol;Acc:24776]
AML1.Control-6.smooth.chr10.cher12	Control	10	29136794	29137294	AML1.Control-6 smooth	1.46125	2.38182	C10orf126	283080	ENSG00000204365	29135337	29170827	1	protein_coding	chromosome 10 open reading frame 126 [Source:HGNC Symbol;Acc:28693]
AML1.Control-6.smooth.chr10.cher13	Control	10	31888216	31888804	AML1.Control-6 smooth	1.16973	1.18277	RP11-472N13.2	NA	ENSG00000223834	31893528	31895146	1	lincRNA
AML1.Control-6.smooth.chr10.cher14	Control	10	43275810	43276590	AML1.Control-6 smooth	1.3071	1.96331	BMS1	101929959	ENSG00000165733	43278249	43326856	1	protein_coding	BMS1 homolog, ribosome assembly protein (yeast) [Source:HGNC Symbol;Acc:23505]
AML1.Control-6.smooth.chr10.cher15	Control	10	58118879	58119648	AML1.Control-6 smooth	1.15687	1.06559	ZWINT	11130	ENSG00000122952	58116989	58121036	-1	protein_coding	ZW10 interactor [Source:HGNC Symbol;Acc:13195]
AML1.Control-6.smooth.chr10.cher16	Control	10	60138302	60139028	AML1.Control-6 smooth	1.1375	0.607062	TFAM	7019	ENSG00000108064	60144782	60158981	1	protein_coding	transcription factor A, mitochondrial [Source:HGNC Symbol;Acc:11741]
AML1.Control-6.smooth.chr10.cher17	Control	10	70847884	70848380	AML1.Control-6 smooth	1.89254	5.13473	SRGN	5552	ENSG00000122862	70847862	70864567	1	protein_coding	serglycin [Source:HGNC Symbol;Acc:9361]
AML1.Control-6.smooth.chr10.cher18	Control	10	71391368	71391838	AML1.Control-6 smooth	1.22107	0.78389	C10orf35	219738	ENSG00000171224	71390007	71393352	1	protein_coding	chromosome 10 open reading frame 35 [Source:HGNC Symbol;Acc:23519]
AML1.Control-6.smooth.chr10.cher19	Control	10	75261324	75262022	AML1.Control-6 smooth	1.87231	5.41696	PPP3CB	5532	ENSG00000107758	75196186	75255782	-1	protein_coding	protein phosphatase 3, catalytic subunit, beta isozyme [Source:HGNC Symbol;Acc:9315]
AML1.Control-6.smooth.chr10.cher20	Control	10	75404864	75405471	AML1.Control-6 smooth	1.46112	1.95458	MYOZ1	58529	ENSG00000177791	75391412	75401515	-1	protein_coding	myozenin 1 [Source:HGNC Symbol;Acc:13752]
AML1.Control-6.smooth.chr10.cher21	Control	10	75539378	75539994	AML1.Control-6 smooth	1.0627	0.423187	CHCHD1	118487	ENSG00000172586	75541805	75543410	1	protein_coding	coiled-coil-helix-coiled-coil-helix domain containing 1 [Source:HGNC Symbol;Acc:23518]
AML1.Control-6.smooth.chr10.cher21	Control	10	75539378	75539994	AML1.Control-6 smooth	1.0627	0.423187	KIAA0913	23053	ENSG00000214655	75545383	75561551	1	protein_coding	KIAA0913 [Source:HGNC Symbol;Acc:23528]
AML1.Control-6.smooth.chr10.cher21	Control	10	75539378	75539994	AML1.Control-6 smooth	1.0627	0.423187	RNase_MRP	NA	ENSG00000253045	75534080	75534299	-1	misc_RNA	RNase MRP [Source:RFAM;Acc:RF00030]
AML1.Control-6.smooth.chr10.cher22	Control	10	79689236	79689944	AML1.Control-6 smooth	1.14586	0.961443	DLG5	9231	ENSG00000151208	79550549	79686378	-1	protein_coding	discs, large homolog 5 (Drosophila) [Source:HGNC Symbol;Acc:2904]
AML1.Control-6.smooth.chr10.cher23	Control	10	82212994	82213466	AML1.Control-6 smooth	1.09943	0.366195	TSPAN14	81619	ENSG00000108219	82213922	82282387	1	protein_coding	tetraspanin 14 [Source:HGNC Symbol;Acc:23303]
AML1.Control-6.smooth.chr10.cher24	Control	10	83628234	83628754	AML1.Control-6 smooth	1.58654	3.1816	NRG3	10718	ENSG00000185737	83635070	84746723	1	protein_coding	neuregulin 3 [Source:HGNC Symbol;Acc:7999]
AML1.Control-6.smooth.chr10.cher25	Control	10	85987942	85988709	AML1.Control-6 smooth	1.67867	5.62538	LRIT2	340745	ENSG00000204033	85980327	85985345	-1	protein_coding	leucine-rich repeat, immunoglobulin-like and transmembrane domains 2 [Source:HGNC Symbol;Acc:23443]
AML1.Control-6.smooth.chr10.cher26	Control	10	89260508	89261108	AML1.Control-6 smooth	1.23792	1.45213	MINPP1	9562	ENSG00000107789	89264632	89313217	1	protein_coding	multiple inositol-polyphosphate phosphatase 1 [Source:HGNC Symbol;Acc:7102]
AML1.Control-6.smooth.chr10.cher27	Control	10	91353334	91353930	AML1.Control-6 smooth	1.29641	1.93066	MIR107	406901	ENSG00000198997	91352500	91352586	-1	miRNA	microRNA 107 [Source:HGNC Symbol;Acc:31496]
AML1.Control-6.smooth.chr10.cher28	Control	10	94607388	94607878	AML1.Control-6 smooth	1.13824	0.796038	EXOC6	54536	ENSG00000138190	94590935	94819250	1	protein_coding	exocyst complex component 6 [Source:HGNC Symbol;Acc:23196]
AML1.Control-6.smooth.chr10.cher29	Control	10	95250344	95251060	AML1.Control-6 smooth	1.23106	1.23571	CEP55	55165	ENSG00000138180	95256389	95288849	1	protein_coding	centrosomal protein 55kDa [Source:HGNC Symbol;Acc:1161]
AML1.Control-6.smooth.chr10.cher30	Control	10	95648960	95649662	AML1.Control-6 smooth	1.5107	3.51668	SLC35G1	159371	ENSG00000176273	95653730	95715819	1	protein_coding	solute carrier family 35, member G1 [Source:HGNC Symbol;Acc:26607]
AML1.Control-6.smooth.chr10.cher31	Control	10	97318278	97318860	AML1.Control-6 smooth	1.12826	0.711423	SORBS1	10580	ENSG00000095637	97071528	97321171	-1	protein_coding	sorbin and SH3 domain containing 1 [Source:HGNC Symbol;Acc:14565]
AML1.Control-6.smooth.chr10.cher32	Control	10	97373870	97374758	AML1.Control-6 smooth	1.38616	2.79489	ALDH18A1	5832	ENSG00000059573	97365696	97416463	-1	protein_coding	aldehyde dehydrogenase 18 family, member A1 [Source:HGNC Symbol;Acc:9722]
AML1.Control-6.smooth.chr10.cher33	Control	10	98943920	98944520	AML1.Control-6 smooth	1.39789	2.22758	SLIT1	6585	ENSG00000187122	98757795	98945683	-1	protein_coding	slit homolog 1 (Drosophila) [Source:HGNC Symbol;Acc:11085]
AML1.Control-6.smooth.chr10.cher34	Control	10	99791730	99792412	AML1.Control-6 smooth	1.10933	0.696146	CRTAC1	55118	ENSG00000095713	99624757	99790585	-1	protein_coding	cartilage acidic protein 1 [Source:HGNC Symbol;Acc:14882]
AML1.Control-6.smooth.chr10.cher36	Control	10	102814722	102815223	AML1.Control-6 smooth	1.59119	1.74201	KAZALD1	81621	ENSG00000107821	102820999	102827888	1	protein_coding	Kazal-type serine peptidase inhibitor domain 1 [Source:HGNC Symbol;Acc:25460]
AML1.Control-6.smooth.chr10.cher37	Control	10	103751456	103752025	AML1.Control-6 smooth	1.54821	3.66804	C10orf76	79591	ENSG00000120029	103605356	103815950	-1	protein_coding	chromosome 10 open reading frame 76 [Source:HGNC Symbol;Acc:25788]
AML1.Control-6.smooth.chr10.cher38	Control	10	104674506	104675002	AML1.Control-6 smooth	1.74209	4.01606	CNNM2	54805	ENSG00000148842	104678071	104838344	1	protein_coding	cyclin M2 [Source:HGNC Symbol;Acc:103]
AML1.Control-6.smooth.chr10.cher39	Control	10	106076894	106077394	AML1.Control-6 smooth	1.16995	0.987615	RP11-127L20.3	101927472	ENSG00000228261	106083127	106086762	1	lincRNA
AML1.Control-6.smooth.chr10.cher39	Control	10	106076894	106077394	AML1.Control-6 smooth	1.16995	0.987615	ITPRIP	85450	ENSG00000148841	106071894	106098162	-1	protein_coding	inositol 1,4,5-trisphosphate receptor interacting protein [Source:HGNC Symbol;Acc:29370]
AML1.Control-6.smooth.chr10.cher40	Control	10	108927819	108928921	AML1.Control-6 smooth	1.42271	3.08853	SORCS1	114815	ENSG00000108018	108336940	108924292	-1	protein_coding	sortilin-related VPS10 domain containing receptor 1 [Source:HGNC Symbol;Acc:16697]
AML1.Control-6.smooth.chr10.cher41	Control	10	114127042	114127942	AML1.Control-6 smooth	1.3656	2.94917	ACSL5	51703	ENSG00000197142	114133776	114188138	1	protein_coding	acyl-CoA synthetase long-chain family member 5 [Source:HGNC Symbol;Acc:16526]
AML1.Control-6.smooth.chr10.cher42	Control	10	114703636	114704265	AML1.Control-6 smooth	1.03046	0.318862	TCF7L2	6934	ENSG00000148737	114710009	114927437	1	protein_coding	transcription factor 7-like 2 (T-cell specific, HMG-box) [Source:HGNC Symbol;Acc:11641]
AML1.Control-6.smooth.chr10.cher43	Control	10	115992948	115993876	AML1.Control-6 smooth	1.44393	3.34219	VWA2	340706	ENSG00000165816	115999089	116051272	1	protein_coding	von Willebrand factor A domain containing 2 [Source:HGNC Symbol;Acc:24709]
AML1.Control-6.smooth.chr10.cher44	Control	10	116450751	116451646	AML1.Control-6 smooth	1.46891	1.68081	PPIAP19	NA	ENSG00000228169	116449902	116450393	-1	pseudogene	peptidylprolyl isomerase A (cyclophilin A) pseudogene 19 [Source:HGNC Symbol;Acc:31663]
AML1.Control-6.smooth.chr10.cher44	Control	10	116450751	116451646	AML1.Control-6 smooth	1.46891	1.68081	ABLIM1	3983	ENSG00000099204	116190872	116444414	-1	protein_coding	actin binding LIM protein 1 [Source:HGNC Symbol;Acc:78]
AML1.Control-6.smooth.chr10.cher45	Control	10	121483046	121483646	AML1.Control-6 smooth	1.12665	0.835501	INPP5F	22876	ENSG00000198825	121485609	121588652	1	protein_coding	inositol polyphosphate-5-phosphatase F [Source:HGNC Symbol;Acc:17054]
AML1.Control-6.smooth.chr10.cher45	Control	10	121483046	121483646	AML1.Control-6 smooth	1.12665	0.835501	RP11-179H18.8	NA	ENSG00000224489	121430230	121484200	-1	processed_transcript
AML1.Control-6.smooth.chr10.cher46	Control	10	124031258	124031748	AML1.Control-6 smooth	1.09266	0.507623	BTBD16	118663	ENSG00000138152	124030821	124097677	1	protein_coding	BTB (POZ) domain containing 16 [Source:HGNC Symbol;Acc:26340]
AML1.Control-6.smooth.chr10.cher47	Control	10	133626168	133626678	AML1.Control-6 smooth	1.10102	0.559562	AL450307.1	NA	ENSG00000189275	133604734	133622535	-1	protein_coding	Uncharacterized protein; cDNA FLJ46300 fis, clone TESTI4035989 [Source:UniProtKB/TrEMBL;Acc:Q6ZRK0]
AML1.Control-6.smooth.chr10.cher48	Control	10	135276304	135276903	AML1.Control-6 smooth	1.40214	2.76896	RP11-108K14.4	619207	ENSG00000214279	135267432	135337062	1	protein_coding	Putative scavenger receptor cysteine-rich domain-containing protein LOC619207 [Source:UniProtKB/Swiss-Prot;Acc:Q4G0T1]
AML1.Control-6.smooth.chr11.cher1	Control	11	1332758	1333838	AML1.Control-6 smooth	1.58376	3.06572	TOLLIP	54472	ENSG00000078902	1295601	1330884	-1	protein_coding	toll interacting protein [Source:HGNC Symbol;Acc:16476]
AML1.Control-6.smooth.chr11.cher2	Control	11	1716954	1717548	AML1.Control-6 smooth	2.27004	7.82248	KRTAP5-6	440023	ENSG00000205864	1718425	1718985	1	protein_coding	keratin associated protein 5-6 [Source:HGNC Symbol;Acc:23600]
AML1.Control-6.smooth.chr11.cher4	Control	11	1918352	1918864	AML1.Control-6 smooth	1.06319	0.341433	AC051649.16	101927624	ENSG00000229671	1923877	1929145	1	lincRNA
AML1.Control-6.smooth.chr11.cher4	Control	11	1918352	1918864	AML1.Control-6 smooth	1.06319	0.341433	C11orf89	NA	ENSG00000184682	1910375	1912084	-1	protein_coding	chromosome 11 open reading frame 89 [Source:HGNC Symbol;Acc:35118]
AML1.Control-6.smooth.chr11.cher8	Control	11	2970572	2971250	AML1.Control-6 smooth	1.37975	2.55033	NAP1L4	4676	ENSG00000205531	2965661	3013607	-1	protein_coding	nucleosome assembly protein 1-like 4 [Source:HGNC Symbol;Acc:7640]
AML1.Control-6.smooth.chr11.cher10	Control	11	3860791	3861280	AML1.Control-6 smooth	1.28322	1.74606	RHOG	391	ENSG00000177105	3848208	3862213	-1	protein_coding	ras homolog family member G [Source:HGNC Symbol;Acc:672]
AML1.Control-6.smooth.chr11.cher11	Control	11	4662480	4663244	AML1.Control-6 smooth	1.23176	1.75721	OR51E1	143503	ENSG00000180785	4664650	4676718	1	protein_coding	olfactory receptor, family 51, subfamily E, member 1 [Source:HGNC Symbol;Acc:15194]
AML1.Control-6.smooth.chr11.cher12	Control	11	4825246	4825874	AML1.Control-6 smooth	1.14343	0.324644	OR52R1	119695	ENSG00000176937	4824663	4825847	-1	protein_coding	olfactory receptor, family 52, subfamily R, member 1 [Source:HGNC Symbol;Acc:15235]
AML1.Control-6.smooth.chr11.cher13	Control	11	4847953	4848448	AML1.Control-6 smooth	1.48156	2.8434	OR51A8P	NA	ENSG00000197984	4853363	4854302	1	pseudogene	olfactory receptor, family 51, subfamily A, member 8 pseudogene [Source:HGNC Symbol;Acc:15189]
AML1.Control-6.smooth.chr11.cher14	Control	11	4964276	4964780	AML1.Control-6 smooth	1.26707	1.15804	OR51A3P	NA	ENSG00000227023	4958601	4959524	-1	pseudogene	olfactory receptor, family 51, subfamily A, member 3 pseudogene [Source:HGNC Symbol;Acc:14794]
AML1.Control-6.smooth.chr11.cher16	Control	11	5322776	5323266	AML1.Control-6 smooth	1.08584	0.540692	OR51B4	79339	ENSG00000183251	5322244	5323226	-1	protein_coding	olfactory receptor, family 51, subfamily B, member 4 [Source:HGNC Symbol;Acc:14708]
AML1.Control-6.smooth.chr11.cher17	Control	11	5566648	5567157	AML1.Control-6 smooth	1.0477	0.3974	OR52H1	390067	ENSG00000181616	5565719	5566779	-1	protein_coding	olfactory receptor, family 52, subfamily H, member 1 [Source:HGNC Symbol;Acc:15218]
AML1.Control-6.smooth.chr11.cher20	Control	11	6500158	6500853	AML1.Control-6 smooth	1.15434	1.25842	TRIM3	10612	ENSG00000110171	6469843	6495689	-1	protein_coding	tripartite motif containing 3 [Source:HGNC Symbol;Acc:10064]
AML1.Control-6.smooth.chr11.cher20	Control	11	6500158	6500853	AML1.Control-6 smooth	1.15434	1.25842	FXC1	26515	ENSG00000132286	6502677	6530208	1	protein_coding	fracture callus 1 homolog (rat) [Source:HGNC Symbol;Acc:4022]
AML1.Control-6.smooth.chr11.cher20	Control	11	6500158	6500853	AML1.Control-6 smooth	1.15434	1.25842	ARFIP2	23647	ENSG00000132254	6496910	6502666	-1	protein_coding	ADP-ribosylation factor interacting protein 2 [Source:HGNC Symbol;Acc:17160]
AML1.Control-6.smooth.chr11.cher21	Control	11	6586494	6587170	AML1.Control-6 smooth	1.27442	2.00397	DNHD1	144132	ENSG00000179532	6518490	6593257	1	protein_coding	dynein heavy chain domain 1 [Source:HGNC Symbol;Acc:26532]
AML1.Control-6.smooth.chr11.cher22	Control	11	6619642	6620452	AML1.Control-6 smooth	1.26985	2.07921	ILK	3611	ENSG00000166333	6624961	6632102	1	protein_coding	integrin-linked kinase [Source:HGNC Symbol;Acc:6040]
AML1.Control-6.smooth.chr11.cher23	Control	11	6630358	6630838	AML1.Control-6 smooth	1.12193	0.786731	RP11-732A19.8	NA	ENSG00000254400	6624872	6625650	-1	antisense
AML1.Control-6.smooth.chr11.cher23	Control	11	6630358	6630838	AML1.Control-6 smooth	1.12193	0.786731	RRP8	23378	ENSG00000132275	6616305	6624850	-1	protein_coding	ribosomal RNA processing 8, methyltransferase, homolog (yeast) [Source:HGNC Symbol;Acc:29030]
AML1.Control-6.smooth.chr11.cher23	Control	11	6630358	6630838	AML1.Control-6 smooth	1.12193	0.786731	RP11-732A19.2	NA	ENSG00000254641	6629897	6631366	-1	processed_transcript
AML1.Control-6.smooth.chr11.cher23	Control	11	6630358	6630838	AML1.Control-6 smooth	1.12193	0.786731	ILK	3611	ENSG00000166333	6624961	6632102	1	protein_coding	integrin-linked kinase [Source:HGNC Symbol;Acc:6040]
AML1.Control-6.smooth.chr11.cher23	Control	11	6630358	6630838	AML1.Control-6 smooth	1.12193	0.786731	TAF10	6881	ENSG00000166337	6627526	6633898	-1	protein_coding	TAF10 RNA polymerase II, TATA box binding protein (TBP)-associated factor, 30kDa [Source:HGNC Symbol;Acc:11543]
AML1.Control-6.smooth.chr11.cher24	Control	11	6790526	6791550	AML1.Control-6 smooth	1.2117	1.2891	OR2AG2	338755	ENSG00000188124	6789218	6790286	-1	protein_coding	olfactory receptor, family 2, subfamily AG, member 2 [Source:HGNC Symbol;Acc:15143]
AML1.Control-6.smooth.chr11.cher25	Control	11	8098764	8099264	AML1.Control-6 smooth	1.03406	0.13788	TUB	7275	ENSG00000166402	8040791	8127659	1	protein_coding	tubby homolog (mouse) [Source:HGNC Symbol;Acc:12406]
AML1.Control-6.smooth.chr11.cher26	Control	11	8196851	8197452	AML1.Control-6 smooth	1.37686	2.53619	RIC3	79608	ENSG00000166405	8127597	8190602	-1	protein_coding	resistance to inhibitors of cholinesterase 3 homolog (C. elegans) [Source:HGNC Symbol;Acc:30338]
AML1.Control-6.smooth.chr11.cher27	Control	11	8282832	8283542	AML1.Control-6 smooth	1.18094	1.31358	LMO1	4004	ENSG00000166407	8245851	8290263	-1	protein_coding	LIM domain only 1 (rhombotin 1) [Source:HGNC Symbol;Acc:6641]
AML1.Control-6.smooth.chr11.cher28	Control	11	9291023	9291600	AML1.Control-6 smooth	1.39488	1.81156	DENND5A	23258	ENSG00000184014	9160372	9286937	-1	protein_coding	DENN/MADD domain containing 5A [Source:HGNC Symbol;Acc:19344]
AML1.Control-6.smooth.chr11.cher29	Control	11	11378956	11379480	AML1.Control-6 smooth	1.0985	0.156716	CSNK2A1P	283106	ENSG00000254598	11373498	11374668	-1	pseudogene	casein kinase 2, alpha 1 polypeptide pseudogene [Source:HGNC Symbol;Acc:2458]
AML1.Control-6.smooth.chr11.cher30	Control	11	15164302	15165180	AML1.Control-6 smooth	1.17991	0.878651	INSC	387755	ENSG00000188487	15133970	15268754	1	protein_coding	inscuteable homolog (Drosophila) [Source:HGNC Symbol;Acc:33116]
AML1.Control-6.smooth.chr11.cher31	Control	11	19367396	19367906	AML1.Control-6 smooth	1.20819	1.27415	NAV2	89797	ENSG00000166833	19372271	20143144	1	protein_coding	neuron navigator 2 [Source:HGNC Symbol;Acc:15997]
AML1.Control-6.smooth.chr11.cher32	Control	11	20689069	20689864	AML1.Control-6 smooth	1.13699	1.08604	NELL1	4745	ENSG00000165973	20691117	21597227	1	protein_coding	NEL-like 1 (chicken) [Source:HGNC Symbol;Acc:7750]
AML1.Control-6.smooth.chr11.cher33	Control	11	27017186	27017879	AML1.Control-6 smooth	1.52932	3.57859	FIBIN	387758	ENSG00000176971	27015628	27018630	1	protein_coding	fin bud initiation factor homolog (zebrafish) [Source:HGNC Symbol;Acc:33747]
AML1.Control-6.smooth.chr11.cher34	Control	11	31526354	31527252	AML1.Control-6 smooth	1.39855	1.58553	ELP4	26610	ENSG00000109911	31531297	31805546	1	protein_coding	elongation protein 4 homolog (S. cerevisiae) [Source:HGNC Symbol;Acc:1171]
AML1.Control-6.smooth.chr11.cher36	Control	11	33759852	33760356	AML1.Control-6 smooth	1.15986	0.794799	CD59	966	ENSG00000085063	33719807	33757991	-1	protein_coding	CD59 molecule, complement regulatory protein [Source:HGNC Symbol;Acc:1689]
AML1.Control-6.smooth.chr11.cher37	Control	11	34124774	34125980	AML1.Control-6 smooth	1.38495	1.90522	NAT10	55226	ENSG00000135372	34127149	34169217	1	protein_coding	N-acetyltransferase 10 (GCN5-related) [Source:HGNC Symbol;Acc:29830]
AML1.Control-6.smooth.chr11.cher38	Control	11	40318042	40318610	AML1.Control-6 smooth	1.24676	1.6704	LRRC4C	57689	ENSG00000148948	40135753	41481323	-1	protein_coding	leucine rich repeat containing 4C [Source:HGNC Symbol;Acc:29317]
AML1.Control-6.smooth.chr11.cher39	Control	11	45165352	45166228	AML1.Control-6 smooth	1.33935	2.76383	PRDM11	101060179	ENSG00000019485	45115564	45247734	1	protein_coding	PR domain containing 11 [Source:HGNC Symbol;Acc:13996]
AML1.Control-6.smooth.chr11.cher39	Control	11	45165352	45166228	AML1.Control-6 smooth	1.33935	2.76383	AC103681.1	NA	ENSG00000214934	45168194	45236289	1	protein_coding
AML1.Control-6.smooth.chr11.cher40	Control	11	45305960	45306430	AML1.Control-6 smooth	1.06831	0.452411	SYT13	57586	ENSG00000019505	45261852	45307870	-1	protein_coding	synaptotagmin XIII [Source:HGNC Symbol;Acc:14962]
AML1.Control-6.smooth.chr11.cher41	Control	11	57094028	57095212	AML1.Control-6 smooth	1.31934	3.09343	TNKS1BP1	85456	ENSG00000149115	57067112	57092426	-1	protein_coding	tankyrase 1 binding protein 1, 182kDa [Source:HGNC Symbol;Acc:19081]
AML1.Control-6.smooth.chr11.cher41	Control	11	57094028	57095212	AML1.Control-6 smooth	1.31934	3.09343	RP11-872D17.4	NA	ENSG00000254662	57093077	57095432	1	antisense
AML1.Control-6.smooth.chr11.cher42	Control	11	59224556	59225486	AML1.Control-6 smooth	1.28913	1.2747	OR4D6	219983	ENSG00000166884	59224411	59225464	1	protein_coding	olfactory receptor, family 4, subfamily D, member 6 [Source:HGNC Symbol;Acc:15175]
AML1.Control-6.smooth.chr11.cher43	Control	11	59612830	59613303	AML1.Control-6 smooth	1.27916	1.29404	GIF	2694	ENSG00000134812	59596741	59612974	-1	protein_coding	gastric intrinsic factor (vitamin B synthesis) [Source:HGNC Symbol;Acc:4268]
AML1.Control-6.smooth.chr11.cher44	Control	11	61557700	61558328	AML1.Control-6 smooth	1.70962	2.92478	FEN1	2237	ENSG00000168496	61560109	61564716	1	protein_coding	flap structure-specific endonuclease 1 [Source:HGNC Symbol;Acc:3650]
AML1.Control-6.smooth.chr11.cher44	Control	11	61557700	61558328	AML1.Control-6 smooth	1.70962	2.92478	FADS2	9415	ENSG00000134824	61560452	61634826	1	protein_coding	fatty acid desaturase 2 [Source:HGNC Symbol;Acc:3575]
AML1.Control-6.smooth.chr11.cher44	Control	11	61557700	61558328	AML1.Control-6 smooth	1.70962	2.92478	RP11-467L20.9	NA	ENSG00000256428	61535973	61558075	-1	processed_transcript
AML1.Control-6.smooth.chr11.cher44	Control	11	61557700	61558328	AML1.Control-6 smooth	1.70962	2.92478	C11orf10	746	ENSG00000134825	61556435	61560274	-1	protein_coding	chromosome 11 open reading frame 10 [Source:HGNC Symbol;Acc:1164]
AML1.Control-6.smooth.chr11.cher45	Control	11	61739770	61740292	AML1.Control-6 smooth	1.70724	4.08707	FTH1	2495	ENSG00000167996	61727190	61735132	-1	protein_coding	ferritin, heavy polypeptide 1 [Source:HGNC Symbol;Acc:3976]
AML1.Control-6.smooth.chr11.cher46	Control	11	62033162	62033772	AML1.Control-6 smooth	1.09161	0.69041	RP11-703H8.9	NA	ENSG00000254404	61980899	62028021	-1	antisense
AML1.Control-6.smooth.chr11.cher46	Control	11	62033162	62033772	AML1.Control-6 smooth	1.09161	0.69041	SCGB2A2	4250	ENSG00000110484	62037627	62040628	1	protein_coding	secretoglobin, family 2A, member 2 [Source:HGNC Symbol;Acc:7050]
AML1.Control-6.smooth.chr11.cher47	Control	11	62103168	62103794	AML1.Control-6 smooth	1.2793	1.57548	ASRGL1	80150	ENSG00000162174	62104920	62160882	1	protein_coding	asparaginase like 1 [Source:HGNC Symbol;Acc:16448]
AML1.Control-6.smooth.chr11.cher48	Control	11	62339162	62340072	AML1.Control-6 smooth	1.28617	2.08168	EEF1G	100500804	ENSG00000254772	62327073	62342401	-1	protein_coding	eukaryotic translation elongation factor 1 gamma [Source:HGNC Symbol;Acc:3213]
AML1.Control-6.smooth.chr11.cher49	Control	11	62343862	62344642	AML1.Control-6 smooth	1.60651	3.5276	EEF1G	100500804	ENSG00000254772	62327073	62342401	-1	protein_coding	eukaryotic translation elongation factor 1 gamma [Source:HGNC Symbol;Acc:3213]
AML1.Control-6.smooth.chr11.cher49	Control	11	62343862	62344642	AML1.Control-6 smooth	1.60651	3.5276	MIR3654	100500804	ENSG00000255508	62327075	62359003	-1	protein_coding	microRNA 3654 [Source:HGNC Symbol;Acc:38896]
AML1.Control-6.smooth.chr11.cher49	Control	11	62343862	62344642	AML1.Control-6 smooth	1.60651	3.5276	TUT1	64852	ENSG00000149016	62342517	62359649	-1	protein_coding	terminal uridylyl transferase 1, U6 snRNA-specific [Source:HGNC Symbol;Acc:26184]
AML1.Control-6.smooth.chr11.cher50	Control	11	63332296	63332809	AML1.Control-6 smooth	1.22319	1.27609	HRASLS2	54979	ENSG00000133328	63320242	63330855	-1	protein_coding	HRAS-like suppressor 2 [Source:HGNC Symbol;Acc:17824]
AML1.Control-6.smooth.chr11.cher51	Control	11	63664730	63665410	AML1.Control-6 smooth	1.38812	2.69242	MARK2	2011	ENSG00000072518	63606400	63678491	1	protein_coding	MAP/microtubule affinity-regulating kinase 2 [Source:HGNC Symbol;Acc:3332]
AML1.Control-6.smooth.chr11.cher52	Control	11	64353972	64354456	AML1.Control-6 smooth	1.53715	2.5687	SLC22A12	116085	ENSG00000197891	64358113	64369820	1	protein_coding	solute carrier family 22 (organic anion/urate transporter), member 12 [Source:HGNC Symbol;Acc:17989]
AML1.Control-6.smooth.chr11.cher53	Control	11	64584964	64585570	AML1.Control-6 smooth	1.50897	3.29845	MEN1	4221	ENSG00000133895	64570988	64578766	-1	protein_coding	multiple endocrine neoplasia I [Source:HGNC Symbol;Acc:7010]
AML1.Control-6.smooth.chr11.cher54	Control	11	64648070	64648544	AML1.Control-6 smooth	1.58816	3.12316	AP001187.11	NA	ENSG00000230835	64649007	64649417	1	pseudogene
AML1.Control-6.smooth.chr11.cher54	Control	11	64648070	64648544	AML1.Control-6 smooth	1.58816	3.12316	EHD1	10938	ENSG00000110047	64619114	64655768	-1	protein_coding	EH-domain containing 1 [Source:HGNC Symbol;Acc:3242]
AML1.Control-6.smooth.chr11.cher55	Control	11	64932833	64933334	AML1.Control-6 smooth	1.44436	1.0139	AP003068.17	NA	ENSG00000255058	64927665	64927853	-1	pseudogene
AML1.Control-6.smooth.chr11.cher55	Control	11	64932833	64933334	AML1.Control-6 smooth	1.44436	1.0139	SPDYC	387778	ENSG00000204710	64937625	64940715	1	protein_coding	speedy homolog C (Xenopus laevis) [Source:HGNC Symbol;Acc:32681]
AML1.Control-6.smooth.chr11.cher56	Control	11	65368353	65368866	AML1.Control-6 smooth	1.66825	3.21063	KCNK7	10089	ENSG00000173338	65360326	65363467	-1	protein_coding	potassium channel, subfamily K, member 7 [Source:HGNC Symbol;Acc:6282]
AML1.Control-6.smooth.chr11.cher58	Control	11	67008610	67009236	AML1.Control-6 smooth	1.18204	0.690938	KDM2A	22992	ENSG00000173120	66886740	67025141	1	protein_coding	lysine (K)-specific demethylase 2A [Source:HGNC Symbol;Acc:13606]
AML1.Control-6.smooth.chr11.cher59	Control	11	68516548	68517158	AML1.Control-6 smooth	1.21066	1.03004	MTL5	9633	ENSG00000132749	68474908	68519032	-1	protein_coding	metallothionein-like 5, testis-specific (tesmin) [Source:HGNC Symbol;Acc:7446]
AML1.Control-6.smooth.chr11.cher60	Control	11	69054848	69055578	AML1.Control-6 smooth	1.36504	2.64692	MYEOV	26579	ENSG00000172927	69061605	69182494	1	protein_coding	myeloma overexpressed (in a subset of t(11;14) positive multiple myelomas) [Source:HGNC Symbol;Acc:7563]
AML1.Control-6.smooth.chr11.cher61	Control	11	72983922	72984694	AML1.Control-6 smooth	1.36621	3.04466	P2RY6	5031	ENSG00000171631	72975550	73009662	1	protein_coding	pyrimidinergic receptor P2Y, G-protein coupled, 6 [Source:HGNC Symbol;Acc:8543]
AML1.Control-6.smooth.chr11.cher62	Control	11	73589978	73590486	AML1.Control-6 smooth	1.17119	1.04827	CHCHD8	51287	ENSG00000181924	73583712	73588033	-1	protein_coding	coiled-coil-helix-coiled-coil-helix domain containing 8 [Source:HGNC Symbol;Acc:24604]
AML1.Control-6.smooth.chr11.cher62	Control	11	73589978	73590486	AML1.Control-6 smooth	1.17119	1.04827	PAAF1	80227	ENSG00000175575	73587744	73638790	1	protein_coding	proteasomal ATPase-associated factor 1 [Source:HGNC Symbol;Acc:25687]
AML1.Control-6.smooth.chr11.cher63	Control	11	73663200	73663790	AML1.Control-6 smooth	1.24209	1.40825	DNAJB13	374407	ENSG00000187726	73661364	73681411	1	protein_coding	DnaJ (Hsp40) homolog, subfamily B, member 13 [Source:HGNC Symbol;Acc:30718]
AML1.Control-6.smooth.chr11.cher64	Control	11	73945768	73946276	AML1.Control-6 smooth	1.17554	1.00118	PPME1	51400	ENSG00000214517	73882144	73965748	1	protein_coding	protein phosphatase methylesterase 1 [Source:HGNC Symbol;Acc:30178]
AML1.Control-6.smooth.chr11.cher65	Control	11	74428186	74428776	AML1.Control-6 smooth	1.15883	0.612977	CHRDL2	25884	ENSG00000054938	74407474	74442430	-1	protein_coding	chordin-like 2 [Source:HGNC Symbol;Acc:24168]
AML1.Control-6.smooth.chr11.cher65	Control	11	74428186	74428776	AML1.Control-6 smooth	1.15883	0.612977	SNORD43	NA	ENSG00000212277	74427732	74427794	-1	snoRNA	Small nucleolar RNA SNORD43 [Source:RFAM;Acc:RF00221]
AML1.Control-6.smooth.chr11.cher66	Control	11	75424080	75424764	AML1.Control-6 smooth	1.27267	1.97172	MOGAT2	80168	ENSG00000166391	75428864	75444003	1	protein_coding	monoacylglycerol O-acyltransferase 2 [Source:HGNC Symbol;Acc:23248]
AML1.Control-6.smooth.chr11.cher67	Control	11	77336120	77336841	AML1.Control-6 smooth	1.66916	4.52489	CLNS1A	1207	ENSG00000074201	77225981	77348850	-1	protein_coding	chloride channel, nucleotide-sensitive, 1A [Source:HGNC Symbol;Acc:2080]
AML1.Control-6.smooth.chr11.cher68	Control	11	77709930	77711852	AML1.Control-6 smooth	1.32939	3.88775	INTS4	92105	ENSG00000149262	77589766	77705724	-1	protein_coding	integrator complex subunit 4 [Source:HGNC Symbol;Acc:25048]
AML1.Control-6.smooth.chr11.cher69	Control	11	77901423	77901894	AML1.Control-6 smooth	1.31698	1.54165	KCTD21	283219	ENSG00000188997	77882295	77899868	-1	protein_coding	potassium channel tetramerisation domain containing 21 [Source:HGNC Symbol;Acc:27452]
AML1.Control-6.smooth.chr11.cher69	Control	11	77901423	77901894	AML1.Control-6 smooth	1.31698	1.54165	USP35	57558	ENSG00000118369	77899858	77925757	1	protein_coding	ubiquitin specific peptidase 35 [Source:HGNC Symbol;Acc:20061]
AML1.Control-6.smooth.chr11.cher70	Control	11	83396101	83396684	AML1.Control-6 smooth	0.996128	0.0854856	DLG2	1740	ENSG00000150672	83166055	85338966	-1	protein_coding	discs, large homolog 2 (Drosophila) [Source:HGNC Symbol;Acc:2901]
AML1.Control-6.smooth.chr11.cher71	Control	11	94273690	94274780	AML1.Control-6 smooth	2.00169	7.65332	PIWIL4	143689	ENSG00000134627	94277006	94354587	1	protein_coding	piwi-like 4 (Drosophila) [Source:HGNC Symbol;Acc:18444]
AML1.Control-6.smooth.chr11.cher71	Control	11	94273690	94274780	AML1.Control-6 smooth	2.00169	7.65332	FUT4	2526	ENSG00000196371	94277017	94283063	1	protein_coding	fucosyltransferase 4 (alpha (1,3) fucosyltransferase, myeloid-specific) [Source:HGNC Symbol;Acc:4015]
AML1.Control-6.smooth.chr11.cher72	Control	11	94500341	94501040	AML1.Control-6 smooth	1.07055	0.639969	AMOTL1	154810	ENSG00000166025	94439597	94609918	1	protein_coding	angiomotin like 1 [Source:HGNC Symbol;Acc:17811]
AML1.Control-6.smooth.chr11.cher73	Control	11	94702174	94702773	AML1.Control-6 smooth	1.54722	3.54913	KDM4D	55693	ENSG00000186280	94706845	94732682	1	protein_coding	lysine (K)-specific demethylase 4D [Source:HGNC Symbol;Acc:25498]
AML1.Control-6.smooth.chr11.cher73	Control	11	94702174	94702773	AML1.Control-6 smooth	1.54722	3.54913	CWC15	51503	ENSG00000150316	94695787	94706776	-1	processed_transcript	CWC15 spliceosome-associated protein homolog (S. cerevisiae) [Source:HGNC Symbol;Acc:26939]
AML1.Control-6.smooth.chr11.cher74	Control	11	94965966	94966441	AML1.Control-6 smooth	1.48933	2.45942	SESN3	143686	ENSG00000149212	94898704	94965705	-1	protein_coding	sestrin 3 [Source:HGNC Symbol;Acc:23060]
AML1.Control-6.smooth.chr11.cher74	Control	11	94965966	94966441	AML1.Control-6 smooth	1.48933	2.45942	RP11-712B9.2	101929295	ENSG00000245552	94883703	94967268	1	lincRNA
AML1.Control-6.smooth.chr11.cher75	Control	11	95529224	95529712	AML1.Control-6 smooth	1.0685	0.154223	FAM76B	143684	ENSG00000077458	95502106	95523573	-1	protein_coding	family with sequence similarity 76, member B [Source:HGNC Symbol;Acc:28492]
AML1.Control-6.smooth.chr11.cher75	Control	11	95529224	95529712	AML1.Control-6 smooth	1.0685	0.154223	CEP57	9702	ENSG00000166037	95523129	95565857	1	protein_coding	centrosomal protein 57kDa [Source:HGNC Symbol;Acc:30794]
AML1.Control-6.smooth.chr11.cher76	Control	11	102497796	102499512	AML1.Control-6 smooth	1.69595	6.26909	MMP20	9313	ENSG00000137674	102447566	102496063	-1	protein_coding	matrix metallopeptidase 20 [Source:HGNC Symbol;Acc:7167]
AML1.Control-6.smooth.chr11.cher77	Control	11	102982391	102982902	AML1.Control-6 smooth	1.08752	0.340621	DYNC2H1	79659	ENSG00000187240	102980160	103350591	1	protein_coding	dynein, cytoplasmic 2, heavy chain 1 [Source:HGNC Symbol;Acc:2962]
AML1.Control-6.smooth.chr11.cher78	Control	11	105481448	105482149	AML1.Control-6 smooth	1.24621	1.87263	GRIA4	2893	ENSG00000152578	105480721	105852819	1	protein_coding	glutamate receptor, ionotropic, AMPA 4 [Source:HGNC Symbol;Acc:4574]
AML1.Control-6.smooth.chr11.cher79	Control	11	110293748	110294539	AML1.Control-6 smooth	1.15065	0.989654	FDX1	2230	ENSG00000137714	110300607	110335605	1	protein_coding	ferredoxin 1 [Source:HGNC Symbol;Acc:3638]
AML1.Control-6.smooth.chr11.cher80	Control	11	110584228	110584920	AML1.Control-6 smooth	1.18946	1.20264	ARHGAP20	57569	ENSG00000137727	110447766	110583912	-1	protein_coding	Rho GTPase activating protein 20 [Source:HGNC Symbol;Acc:18357]
AML1.Control-6.smooth.chr11.cher81	Control	11	111388430	111388862	AML1.Control-6 smooth	1.1071	0.380176	BTG4	54766	ENSG00000137707	111338251	111383079	-1	protein_coding	B-cell translocation gene 4 [Source:HGNC Symbol;Acc:13862]
AML1.Control-6.smooth.chr11.cher81	Control	11	111388430	111388862	AML1.Control-6 smooth	1.1071	0.380176	C11orf88	399949	ENSG00000183644	111385510	111407756	1	protein_coding	chromosome 11 open reading frame 88 [Source:HGNC Symbol;Acc:25061]
AML1.Control-6.smooth.chr11.cher82	Control	11	113111298	113112674	AML1.Control-6 smooth	1.64488	6.22342	NCAM1	4684	ENSG00000149294	112831997	113149158	1	protein_coding	neural cell adhesion molecule 1 [Source:HGNC Symbol;Acc:7656]
AML1.Control-6.smooth.chr11.cher83	Control	11	113645748	113646272	AML1.Control-6 smooth	1.36853	2.06603	ZW10	9183	ENSG00000086827	113603909	113644533	-1	protein_coding	ZW10, kinetochore associated, homolog (Drosophila) [Source:HGNC Symbol;Acc:13194]
AML1.Control-6.smooth.chr11.cher83	Control	11	113645748	113646272	AML1.Control-6 smooth	1.36853	2.06603	CLDN25	644672	ENSG00000228607	113650469	113651222	1	protein_coding	claudin 25 [Source:HGNC Symbol;Acc:37218]
AML1.Control-6.smooth.chr11.cher83	Control	11	113645748	113646272	AML1.Control-6 smooth	1.36853	2.06603	RP11-667M19.2	NA	ENSG00000256603	113641115	113642413	-1	antisense
AML1.Control-6.smooth.chr11.cher84	Control	11	116506554	116507048	AML1.Control-6 smooth	1.19302	1.27827	AP000770.1	101929011	ENSG00000237937	116510139	116528969	1	lincRNA
AML1.Control-6.smooth.chr11.cher85	Control	11	117016266	117016778	AML1.Control-6 smooth	1.17786	1.00893	RP11-109L13.5	NA	ENSG00000254678	117014607	117014907	-1	pseudogene
AML1.Control-6.smooth.chr11.cher85	Control	11	117016266	117016778	AML1.Control-6 smooth	1.17786	1.00893	PAFAH1B2	5049	ENSG00000168092	117014983	117047610	1	protein_coding	platelet-activating factor acetylhydrolase 1b, catalytic subunit 2 (30kDa) [Source:HGNC Symbol;Acc:8575]
AML1.Control-6.smooth.chr11.cher86	Control	11	117199226	117199720	AML1.Control-6 smooth	1.4992	2.57633	AP000892.4	NA	ENSG00000250699	117187078	117198754	-1	protein_coding	Uncharacterized protein [Source:UniProtKB/TrEMBL;Acc:E9PKV6]
AML1.Control-6.smooth.chr11.cher86	Control	11	117199226	117199720	AML1.Control-6 smooth	1.4992	2.57633	CEP164	22897	ENSG00000110274	117185273	117283984	1	protein_coding	centrosomal protein 164kDa [Source:HGNC Symbol;Acc:29182]
AML1.Control-6.smooth.chr11.cher87	Control	11	117800342	117800848	AML1.Control-6 smooth	1.0826	0.587585	TMPRSS13	84000	ENSG00000137747	117771358	117800174	-1	protein_coding	transmembrane protease, serine 13 [Source:HGNC Symbol;Acc:29808]
AML1.Control-6.smooth.chr11.cher88	Control	11	118029882	118030372	AML1.Control-6 smooth	1.09552	0.623027	SCN4B	6330	ENSG00000177098	118004092	118023603	-1	protein_coding	sodium channel, voltage-gated, type IV, beta subunit [Source:HGNC Symbol;Acc:10592]
AML1.Control-6.smooth.chr11.cher89	Control	11	118045258	118045864	AML1.Control-6 smooth	1.36593	1.91185	SCN2B	6327	ENSG00000149575	118032666	118047388	-1	protein_coding	sodium channel, voltage-gated, type II, beta subunit [Source:HGNC Symbol;Acc:10589]
AML1.Control-6.smooth.chr11.cher90	Control	11	118046448	118047168	AML1.Control-6 smooth	1.18932	1.38299	SCN2B	6327	ENSG00000149575	118032666	118047388	-1	protein_coding	sodium channel, voltage-gated, type II, beta subunit [Source:HGNC Symbol;Acc:10589]
AML1.Control-6.smooth.chr11.cher91	Control	11	119604466	119605284	AML1.Control-6 smooth	1.55913	4.08642	PVRL1	5818	ENSG00000110400	119494120	119599794	-1	protein_coding	poliovirus receptor-related 1 (herpesvirus entry mediator C) [Source:HGNC Symbol;Acc:9706]
AML1.Control-6.smooth.chr11.cher92	Control	11	120104800	120105397	AML1.Control-6 smooth	1.43822	2.77719	POU2F3	25833	ENSG00000137709	120107349	120190653	1	protein_coding	POU class 2 homeobox 3 [Source:HGNC Symbol;Acc:19864]
AML1.Control-6.smooth.chr11.cher93	Control	11	123392403	123392986	AML1.Control-6 smooth	1.26836	1.75212	GRAMD1B	57476	ENSG00000023171	123396344	123498482	1	protein_coding	GRAM domain containing 1B [Source:HGNC Symbol;Acc:29214]
AML1.Control-6.smooth.chr11.cher94	Control	11	124611672	124612188	AML1.Control-6 smooth	1.22003	1.24798	NRGN	4900	ENSG00000154146	124609829	124617869	1	protein_coding	neurogranin (protein kinase C substrate, RC3) [Source:HGNC Symbol;Acc:8000]
AML1.Control-6.smooth.chr11.cher95	Control	11	124634665	124635150	AML1.Control-6 smooth	1.22612	0.899497	ESAM	90952	ENSG00000149564	124622026	124632186	-1	protein_coding	endothelial cell adhesion molecule [Source:HGNC Symbol;Acc:17474]
AML1.Control-6.smooth.chr11.cher95	Control	11	124634665	124635150	AML1.Control-6 smooth	1.22612	0.899497	RP11-677M14.3	101930471	ENSG00000250073	124629025	124635832	1	lincRNA
AML1.Control-6.smooth.chr11.cher96	Control	11	124982888	124983408	AML1.Control-6 smooth	1.18177	1.128	RP11-687M24.3	NA	ENSG00000187686	124983057	124996677	1	pseudogene
AML1.Control-6.smooth.chr11.cher96	Control	11	124982888	124983408	AML1.Control-6 smooth	1.18177	1.128	TMEM218	219854	ENSG00000150433	124966398	124981659	-1	protein_coding	transmembrane protein 218 [Source:HGNC Symbol;Acc:27344]
AML1.Control-6.smooth.chr11.cher97	Control	11	125934442	125934919	AML1.Control-6 smooth	1.1243	0.735391	NAP1L1P1	NA	ENSG00000254759	125937434	125938496	1	pseudogene	nucleosome assembly protein 1-like 1 pseudogene 1 [Source:HGNC Symbol;Acc:38004]
AML1.Control-6.smooth.chr11.cher97	Control	11	125934442	125934919	AML1.Control-6 smooth	1.1243	0.735391	CDON	50937	ENSG00000064309	125825691	125933230	-1	protein_coding	Cdon homolog (mouse) [Source:HGNC Symbol;Acc:17104]
AML1.Control-6.smooth.chr11.cher98	Control	11	128456280	128456780	AML1.Control-6 smooth	1.19951	1.2963	ETS1	2113	ENSG00000134954	128328656	128457437	-1	protein_coding	v-ets erythroblastosis virus E26 oncogene homolog 1 (avian) [Source:HGNC Symbol;Acc:3488]
AML1.Control-6.smooth.chr11.cher99	Control	11	128755471	128756270	AML1.Control-6 smooth	1.19233	1.60238	KCNJ5	3762	ENSG00000120457	128760140	128790930	1	protein_coding	potassium inwardly-rectifying channel, subfamily J, member 5 [Source:HGNC Symbol;Acc:6266]
AML1.Control-6.smooth.chr11.cher99	Control	11	128755471	128756270	AML1.Control-6 smooth	1.19233	1.60238	RP11-740D6.3	NA	ENSG00000255369	128750220	128750563	-1	pseudogene
AML1.Control-6.smooth.chr11.cher100	Control	11	129866374	129866976	AML1.Control-6 smooth	1.20539	0.967746	LINC00167	440072	ENSG00000233220	129872833	129874251	1	lincRNA	long intergenic non-protein coding RNA 167 [Source:HGNC Symbol;Acc:30468]
AML1.Control-6.smooth.chr11.cher101	Control	11	131326830	131327344	AML1.Control-6 smooth	1.07532	0.288699	NTM	50863	ENSG00000182667	131240373	132206716	1	protein_coding	neurotrimin [Source:HGNC Symbol;Acc:17941]
AML1.Control-6.smooth.chr11.cher104	Control	11	134287750	134288646	AML1.Control-6 smooth	1.16111	1.56822	B3GAT1	27087	ENSG00000109956	134248398	134281812	-1	protein_coding	beta-1,3-glucuronyltransferase 1 (glucuronosyltransferase P) [Source:HGNC Symbol;Acc:921]
AML1.Control-6.smooth.chr12.cher1	Control	12	503318	504198	AML1.Control-6 smooth	1.67731	5.16907	KDM5A	5927	ENSG00000073614	389223	498620	-1	protein_coding	lysine (K)-specific demethylase 5A [Source:HGNC Symbol;Acc:9886]
AML1.Control-6.smooth.chr12.cher1	Control	12	503318	504198	AML1.Control-6 smooth	1.67731	5.16907	CCDC77	84318	ENSG00000120647	498439	551811	1	protein_coding	coiled-coil domain containing 77 [Source:HGNC Symbol;Acc:28203]
AML1.Control-6.smooth.chr12.cher2	Control	12	1797703	1798282	AML1.Control-6 smooth	1.05072	0.21961	ADIPOR2	79602	ENSG00000006831	1797740	1897844	1	protein_coding	adiponectin receptor 2 [Source:HGNC Symbol;Acc:24041]
AML1.Control-6.smooth.chr12.cher3	Control	12	2801166	2801664	AML1.Control-6 smooth	1.37505	1.73216	CACNA1C-AS1	100652846	ENSG00000246627	2785167	2800366	-1	antisense	CACNA1C antisense RNA 1 (non-protein coding) [Source:HGNC Symbol;Acc:40119]
AML1.Control-6.smooth.chr12.cher4	Control	12	3069428	3070152	AML1.Control-6 smooth	1.09252	0.628216	U6	NA	ENSG00000252996	3063406	3063504	-1	snRNA	U6 spliceosomal RNA [Source:RFAM;Acc:RF00026]
AML1.Control-6.smooth.chr12.cher4	Control	12	3069428	3070152	AML1.Control-6 smooth	1.09252	0.628216	TEAD4	7004	ENSG00000197905	3068496	3149839	1	protein_coding	TEA domain family member 4 [Source:HGNC Symbol;Acc:11717]
AML1.Control-6.smooth.chr12.cher5	Control	12	6306816	6307598	AML1.Control-6 smooth	1.2767	1.24291	CD9	928	ENSG00000010278	6308881	6347427	1	protein_coding	CD9 molecule [Source:HGNC Symbol;Acc:1709]
AML1.Control-6.smooth.chr12.cher6	Control	12	6666404	6666928	AML1.Control-6 smooth	1.09705	0.241899	IFFO1	25900	ENSG00000010295	6647541	6665239	-1	protein_coding	intermediate filament family orphan 1 [Source:HGNC Symbol;Acc:24970]
AML1.Control-6.smooth.chr12.cher7	Control	12	6721304	6721814	AML1.Control-6 smooth	1.0992	0.632937	CHD4	1108	ENSG00000111642	6679249	6716642	-1	protein_coding	chromodomain helicase DNA binding protein 4 [Source:HGNC Symbol;Acc:1919]
AML1.Control-6.smooth.chr12.cher8	Control	12	6924895	6925408	AML1.Control-6 smooth	1.08121	0.58033	GPR162	27239	ENSG00000250510	6930711	6936586	1	protein_coding	G protein-coupled receptor 162 [Source:HGNC Symbol;Acc:16693]
AML1.Control-6.smooth.chr12.cher8	Control	12	6924895	6925408	AML1.Control-6 smooth	1.08121	0.58033	CD4	920	ENSG00000010610	6896024	6929974	1	protein_coding	CD4 molecule [Source:HGNC Symbol;Acc:1678]
AML1.Control-6.smooth.chr12.cher9	Control	12	7912566	7913066	AML1.Control-6 smooth	1.05791	0.100072	NANOGNB	360030	ENSG00000205857	7917812	7926717	1	protein_coding	NANOG neighbor homeobox [Source:HGNC Symbol;Acc:24958]
AML1.Control-6.smooth.chr12.cher10	Control	12	10374622	10375412	AML1.Control-6 smooth	1.60102	3.2519	KLRD1	3824	ENSG00000134539	10378657	10469850	1	protein_coding	killer cell lectin-like receptor subfamily D, member 1 [Source:HGNC Symbol;Acc:6378]
AML1.Control-6.smooth.chr12.cher10	Control	12	10374622	10375412	AML1.Control-6 smooth	1.60102	3.2519	RP11-656E20.4	NA	ENSG00000245856	10370462	10372350	-1	antisense
AML1.Control-6.smooth.chr12.cher11	Control	12	12871534	12872570	AML1.Control-6 smooth	1.58873	3.84062	RP11-59H1.3	NA	ENSG00000255661	12878851	12982909	1	protein_coding	Uncharacterized protein [Source:UniProtKB/TrEMBL;Acc:F5GX34]
AML1.Control-6.smooth.chr12.cher11	Control	12	12871534	12872570	AML1.Control-6 smooth	1.58873	3.84062	APOLD1	81575	ENSG00000178878	12878865	12944400	1	protein_coding	apolipoprotein L domain containing 1 [Source:HGNC Symbol;Acc:25268]
AML1.Control-6.smooth.chr12.cher11	Control	12	12871534	12872570	AML1.Control-6 smooth	1.58873	3.84062	CDKN1B	1027	ENSG00000111276	12867992	12875305	1	protein_coding	cyclin-dependent kinase inhibitor 1B (p27, Kip1) [Source:HGNC Symbol;Acc:1785]
AML1.Control-6.smooth.chr12.cher12	Control	12	13150528	13151504	AML1.Control-6 smooth	1.71618	4.64944	HTR7P1	93164	ENSG00000183935	13152812	13157764	1	pseudogene	5-hydroxytryptamine (serotonin) receptor 7 pseudogene 1 [Source:HGNC Symbol;Acc:30411]
AML1.Control-6.smooth.chr12.cher12	Control	12	13150528	13151504	AML1.Control-6 smooth	1.71618	4.64944	RP11-377D9.3	NA	ENSG00000255621	13153385	13193613	1	processed_transcript
AML1.Control-6.smooth.chr12.cher12	Control	12	13150528	13151504	AML1.Control-6 smooth	1.71618	4.64944	HEBP1	50865	ENSG00000013583	13127798	13153207	-1	protein_coding	heme binding protein 1 [Source:HGNC Symbol;Acc:17176]
AML1.Control-6.smooth.chr12.cher13	Control	12	13534620	13535134	AML1.Control-6 smooth	1.50212	2.87303	C12orf36	NA	ENSG00000180861	13524023	13540101	-1	protein_coding	chromosome 12 open reading frame 36 [Source:HGNC Symbol;Acc:26598]
AML1.Control-6.smooth.chr12.cher14	Control	12	15371435	15371941	AML1.Control-6 smooth	1.28148	1.39227	RERG	85004	ENSG00000134533	15260717	15501609	-1	protein_coding	RAS-like, estrogen-regulated, growth inhibitor [Source:HGNC Symbol;Acc:15980]
AML1.Control-6.smooth.chr12.cher15	Control	12	18870450	18871038	AML1.Control-6 smooth	1.23693	1.1828	PLCZ1	89869	ENSG00000139151	18836103	18890991	-1	protein_coding	phospholipase C, zeta 1 [Source:HGNC Symbol;Acc:19218]
AML1.Control-6.smooth.chr12.cher15	Control	12	18870450	18871038	AML1.Control-6 smooth	1.23693	1.1828	RP11-361I14.2	NA	ENSG00000255648	18867729	18890812	1	antisense
AML1.Control-6.smooth.chr12.cher16	Control	12	21762700	21763202	AML1.Control-6 smooth	1.4426	2.63784	GYS2	2998	ENSG00000111713	21689123	21757781	-1	protein_coding	glycogen synthase 2 (liver) [Source:HGNC Symbol;Acc:4707]
AML1.Control-6.smooth.chr12.cher17	Control	12	26113119	26114020	AML1.Control-6 smooth	1.73981	4.79264	RP11-877E17.2	100506451	ENSG00000246695	26092262	26112698	-1	antisense
AML1.Control-6.smooth.chr12.cher17	Control	12	26113119	26114020	AML1.Control-6 smooth	1.73981	4.79264	RASSF8	11228	ENSG00000123094	26111962	26232825	1	protein_coding	Ras association (RalGDS/AF-6) domain family (N-terminal) member 8 [Source:HGNC Symbol;Acc:13232]
AML1.Control-6.smooth.chr12.cher18	Control	12	26983390	26983864	AML1.Control-6 smooth	1.067	0.48234	ITPR2	3709	ENSG00000123104	26490342	26986131	-1	protein_coding	inositol 1,4,5-trisphosphate receptor, type 2 [Source:HGNC Symbol;Acc:6181]
AML1.Control-6.smooth.chr12.cher19	Control	12	27672586	27673099	AML1.Control-6 smooth	1.31329	1.79382	PPFIBP1	8496	ENSG00000110841	27676364	27848497	1	protein_coding	PTPRF interacting protein, binding protein 1 (liprin beta 1) [Source:HGNC Symbol;Acc:9249]
AML1.Control-6.smooth.chr12.cher20	Control	12	31808970	31809764	AML1.Control-6 smooth	1.39435	3.17307	METTL20	254013	ENSG00000139160	31800094	31826048	1	protein_coding	methyltransferase like 20 [Source:HGNC Symbol;Acc:28739]
AML1.Control-6.smooth.chr12.cher21	Control	12	39304784	39305677	AML1.Control-6 smooth	1.32537	2.71867	CPNE8	144402	ENSG00000139117	39040624	39301232	-1	protein_coding	copine VIII [Source:HGNC Symbol;Acc:23498]
AML1.Control-6.smooth.chr12.cher23	Control	12	41833490	41833976	AML1.Control-6 smooth	1.12658	0.860435	PDZRN4	29951	ENSG00000165966	41582250	41968392	1	protein_coding	PDZ domain containing ring finger 4 [Source:HGNC Symbol;Acc:30552]
AML1.Control-6.smooth.chr12.cher24	Control	12	42539822	42540513	AML1.Control-6 smooth	1.44739	2.83041	GXYLT1	283464	ENSG00000151233	42475647	42538681	-1	protein_coding	glucoside xylosyltransferase 1 [Source:HGNC Symbol;Acc:27482]
AML1.Control-6.smooth.chr12.cher25	Control	12	48162240	48163036	AML1.Control-6 smooth	1.26879	1.85261	SLC48A1	55652	ENSG00000211584	48147699	48176536	1	protein_coding	solute carrier family 48 (heme transporter), member 1 [Source:HGNC Symbol;Acc:26035]
AML1.Control-6.smooth.chr12.cher25	Control	12	48162240	48163036	AML1.Control-6 smooth	1.26879	1.85261	RAPGEF3	10411	ENSG00000079337	48128455	48164823	-1	protein_coding	Rap guanine nucleotide exchange factor (GEF) 3 [Source:HGNC Symbol;Acc:16629]
AML1.Control-6.smooth.chr12.cher26	Control	12	49244344	49244955	AML1.Control-6 smooth	1.59137	2.90568	DDX23	9416	ENSG00000174243	49223840	49246625	-1	protein_coding	DEAD (Asp-Glu-Ala-Asp) box polypeptide 23 [Source:HGNC Symbol;Acc:17347]
AML1.Control-6.smooth.chr12.cher27	Control	12	53436170	53436652	AML1.Control-6 smooth	1.59368	2.67866	TENC1	23371	ENSG00000111077	53440753	53458156	1	protein_coding	tensin like C1 domain containing phosphatase (tensin 2) [Source:HGNC Symbol;Acc:19737]
AML1.Control-6.smooth.chr12.cher28	Control	12	53498892	53499388	AML1.Control-6 smooth	1.37675	1.39511	SOAT2	8435	ENSG00000167780	53497302	53518322	1	protein_coding	sterol O-acyltransferase 2 [Source:HGNC Symbol;Acc:11178]
AML1.Control-6.smooth.chr12.cher29	Control	12	54667846	54668426	AML1.Control-6 smooth	1.08496	0.425699	RP11-968A15.8	NA	ENSG00000258344	54670415	54738867	1	non_coding
AML1.Control-6.smooth.chr12.cher29	Control	12	54667846	54668426	AML1.Control-6 smooth	1.08496	0.425699	HNRNPA1	3178	ENSG00000135486	54673977	54680872	1	protein_coding	heterogeneous nuclear ribonucleoprotein A1 [Source:HGNC Symbol;Acc:5031]
AML1.Control-6.smooth.chr12.cher30	Control	12	56215730	56216381	AML1.Control-6 smooth	1.31583	1.83366	SARNP	84324	ENSG00000205323	56146247	56211540	-1	protein_coding	SAP domain containing ribonucleoprotein [Source:HGNC Symbol;Acc:24432]
AML1.Control-6.smooth.chr12.cher30	Control	12	56215730	56216381	AML1.Control-6 smooth	1.31583	1.83366	RP11-762I7.5	NA	ENSG00000257390	56151059	56221330	-1	protein_coding	Uncharacterized protein [Source:UniProtKB/TrEMBL;Acc:H0YHH1]
AML1.Control-6.smooth.chr12.cher30	Control	12	56215730	56216381	AML1.Control-6 smooth	1.31583	1.83366	DNAJC14	85406	ENSG00000135392	56214744	56224608	-1	protein_coding	DnaJ (Hsp40) homolog, subfamily C, member 14 [Source:HGNC Symbol;Acc:24581]
AML1.Control-6.smooth.chr12.cher31	Control	12	56323322	56324047	AML1.Control-6 smooth	1.41744	3.04318	WIBG	84305	ENSG00000170473	56295197	56326402	-1	protein_coding	within bgcn homolog (Drosophila) [Source:HGNC Symbol;Acc:30258]
AML1.Control-6.smooth.chr12.cher31	Control	12	56323322	56324047	AML1.Control-6 smooth	1.41744	3.04318	DGKA	1606	ENSG00000065357	56321103	56347811	1	protein_coding	diacylglycerol kinase, alpha 80kDa [Source:HGNC Symbol;Acc:2849]
AML1.Control-6.smooth.chr12.cher32	Control	12	56384377	56385198	AML1.Control-6 smooth	1.11077	0.493538	AC034102.1	NA	ENSG00000255990	56385991	56388469	1	pseudogene
AML1.Control-6.smooth.chr12.cher32	Control	12	56384377	56385198	AML1.Control-6 smooth	1.11077	0.493538	RAB5B	5869	ENSG00000111540	56367697	56388490	1	protein_coding	RAB5B, member RAS oncogene family [Source:HGNC Symbol;Acc:9784]
AML1.Control-6.smooth.chr12.cher32	Control	12	56384377	56385198	AML1.Control-6 smooth	1.11077	0.493538	SUOX	6821	ENSG00000139531	56390964	56400425	1	protein_coding	sulfite oxidase [Source:HGNC Symbol;Acc:11460]
AML1.Control-6.smooth.chr12.cher33	Control	12	56856796	56857504	AML1.Control-6 smooth	1.05715	0.280796	SPRYD4	283377	ENSG00000176422	56862301	56864763	1	protein_coding	SPRY domain containing 4 [Source:HGNC Symbol;Acc:27468]
AML1.Control-6.smooth.chr12.cher34	Control	12	57693470	57694354	AML1.Control-6 smooth	1.21818	1.17306	RP11-123K3.4	NA	ENSG00000258830	57643392	57690267	-1	processed_transcript
AML1.Control-6.smooth.chr12.cher34	Control	12	57693470	57694354	AML1.Control-6 smooth	1.21818	1.17306	R3HDM2	22864	ENSG00000179912	57643392	57824788	-1	protein_coding	R3H domain containing 2 [Source:HGNC Symbol;Acc:29167]
AML1.Control-6.smooth.chr12.cher35	Control	12	58146875	58147593	AML1.Control-6 smooth	1.27682	1.31087	CDK4	1019	ENSG00000135446	58142034	58149796	-1	protein_coding	cyclin-dependent kinase 4 [Source:HGNC Symbol;Acc:1773]
AML1.Control-6.smooth.chr12.cher35	Control	12	58146875	58147593	AML1.Control-6 smooth	1.27682	1.31087	MARCH9	92979	ENSG00000139266	58148881	58154190	1	protein_coding	membrane-associated ring finger (C3HC4) 9 [Source:HGNC Symbol;Acc:25139]
AML1.Control-6.smooth.chr12.cher36	Control	12	58162682	58163372	AML1.Control-6 smooth	1.25489	1.25022	RP11-571M6.13	NA	ENSG00000257152	58158794	58162769	-1	processed_transcript
AML1.Control-6.smooth.chr12.cher36	Control	12	58162682	58163372	AML1.Control-6 smooth	1.25489	1.25022	CYP27B1	1594	ENSG00000111012	58156117	58161034	-1	protein_coding	cytochrome P450, family 27, subfamily B, polypeptide 1 [Source:HGNC Symbol;Acc:2606]
AML1.Control-6.smooth.chr12.cher36	Control	12	58162682	58163372	AML1.Control-6 smooth	1.25489	1.25022	METTL21B	25895	ENSG00000123427	58165275	58176324	1	protein_coding	methyltransferase like 21B [Source:HGNC Symbol;Acc:24936]
AML1.Control-6.smooth.chr12.cher36	Control	12	58162682	58163372	AML1.Control-6 smooth	1.25489	1.25022	RP11-571M6.15	NA	ENSG00000257921	58166811	58180829	1	protein_coding	Uncharacterized protein [Source:UniProtKB/TrEMBL;Acc:H0YIJ7]
AML1.Control-6.smooth.chr12.cher36	Control	12	58162682	58163372	AML1.Control-6 smooth	1.25489	1.25022	METTL1	4234	ENSG00000037897	58162254	58166576	-1	protein_coding	methyltransferase like 1 [Source:HGNC Symbol;Acc:7030]
AML1.Control-6.smooth.chr12.cher37	Control	12	62994290	62994890	AML1.Control-6 smooth	1.01101	0.221795	RP11-631N16.2	NA	ENSG00000257354	62996532	63007855	1	antisense
AML1.Control-6.smooth.chr12.cher37	Control	12	62994290	62994890	AML1.Control-6 smooth	1.01101	0.221795	MIRLET7I	406891	ENSG00000199179	62997466	62997550	1	miRNA	microRNA let-7i [Source:HGNC Symbol;Acc:31486]
AML1.Control-6.smooth.chr12.cher38	Control	12	85427258	85428030	AML1.Control-6 smooth	1.70036	4.75055	LRRIQ1	84125	ENSG00000133640	85430092	85657002	1	protein_coding	leucine-rich repeats and IQ motif containing 1 [Source:HGNC Symbol;Acc:25708]
AML1.Control-6.smooth.chr12.cher38	Control	12	85427258	85428030	AML1.Control-6 smooth	1.70036	4.75055	TSPAN19	144448	ENSG00000231738	85408094	85430055	-1	protein_coding	tetraspanin 19 [Source:HGNC Symbol;Acc:31886]
AML1.Control-6.smooth.chr12.cher39	Control	12	95396326	95396911	AML1.Control-6 smooth	1.39916	2.21243	NDUFA12	55967	ENSG00000184752	95290831	95397546	-1	protein_coding	NADH dehydrogenase (ubiquinone) 1 alpha subcomplex, 12 [Source:HGNC Symbol;Acc:23987]
AML1.Control-6.smooth.chr12.cher40	Control	12	96581335	96581848	AML1.Control-6 smooth	1.41993	2.07987	ELK3	2004	ENSG00000111145	96588160	96663613	1	protein_coding	ELK3, ETS-domain protein (SRF accessory protein 2) [Source:HGNC Symbol;Acc:3325]
AML1.Control-6.smooth.chr12.cher41	Control	12	100172462	100172944	AML1.Control-6 smooth	1.59378	1.98818	ANKS1B	56899	ENSG00000185046	99120235	100378432	-1	protein_coding	ankyrin repeat and sterile alpha motif domain containing 1B [Source:HGNC Symbol;Acc:24600]
AML1.Control-6.smooth.chr12.cher43	Control	12	107485152	107485632	AML1.Control-6 smooth	1.15795	0.64339	RP11-797M17.1	NA	ENSG00000257548	107487076	107517092	1	processed_transcript
AML1.Control-6.smooth.chr12.cher43	Control	12	107485152	107485632	AML1.Control-6 smooth	1.15795	0.64339	CRY1	1407	ENSG00000008405	107385142	107487607	-1	protein_coding	cryptochrome 1 (photolyase-like) [Source:HGNC Symbol;Acc:2384]
AML1.Control-6.smooth.chr12.cher44	Control	12	108997955	108998654	AML1.Control-6 smooth	1.48606	2.1827	TMEM119	338773	ENSG00000183160	108983622	108992096	-1	protein_coding	transmembrane protein 119 [Source:HGNC Symbol;Acc:27884]
AML1.Control-6.smooth.chr12.cher45	Control	12	112199602	112200072	AML1.Control-6 smooth	1.1194	0.706528	ALDH2	217	ENSG00000111275	112204691	112247782	1	protein_coding	aldehyde dehydrogenase 2 family (mitochondrial) [Source:HGNC Symbol;Acc:404]
AML1.Control-6.smooth.chr12.cher46	Control	12	115118552	115119422	AML1.Control-6 smooth	1.33929	3.23546	TBX3	6926	ENSG00000135111	115108059	115121969	-1	protein_coding	T-box 3 [Source:HGNC Symbol;Acc:11602]
AML1.Control-6.smooth.chr12.cher47	Control	12	117805732	117806355	AML1.Control-6 smooth	1.04746	0.431144	NOS1	4842	ENSG00000089250	117636114	117889975	-1	protein_coding	nitric oxide synthase 1 (neuronal) [Source:HGNC Symbol;Acc:7872]
AML1.Control-6.smooth.chr12.cher48	Control	12	120558348	120559366	AML1.Control-6 smooth	1.33836	2.87613	RAB35	11021	ENSG00000111737	120532899	120555306	-1	protein_coding	RAB35, member RAS oncogene family [Source:HGNC Symbol;Acc:9774]
AML1.Control-6.smooth.chr12.cher49	Control	12	123320866	123321591	AML1.Control-6 smooth	1.36438	1.56443	HIP1R	9026	ENSG00000130787	123319000	123347507	1	protein_coding	huntingtin interacting protein 1 related [Source:HGNC Symbol;Acc:18415]
AML1.Control-6.smooth.chr12.cher50	Control	12	124495206	124495690	AML1.Control-6 smooth	1.27753	1.6958	RP11-214K3.5	NA	ENSG00000256827	124490418	124490772	-1	pseudogene
AML1.Control-6.smooth.chr12.cher51	Control	12	130816458	130817056	AML1.Control-6 smooth	1.31872	1.94137	PIWIL1	9271	ENSG00000125207	130822432	130857182	1	protein_coding	piwi-like 1 (Drosophila) [Source:HGNC Symbol;Acc:9007]
AML1.Control-6.smooth.chr12.cher52	Control	12	133409534	133410012	AML1.Control-6 smooth	1.31717	1.9514	GOLGA3	2802	ENSG00000090615	133345495	133405444	-1	protein_coding	golgin A3 [Source:HGNC Symbol;Acc:4426]
AML1.Control-6.smooth.chr13.cher1	Control	13	27335914	27336388	AML1.Control-6 smooth	1.02487	0.234798	GPR12	2835	ENSG00000132975	27329341	27334922	-1	protein_coding	G protein-coupled receptor 12 [Source:HGNC Symbol;Acc:4466]
AML1.Control-6.smooth.chr13.cher2	Control	13	30066691	30067992	AML1.Control-6 smooth	1.25967	2.0856	MTUS2-AS1	100874107	ENSG00000179141	30051033	30061887	-1	antisense	MTUS2 antisense RNA 1 (non-protein coding) [Source:HGNC Symbol;Acc:40924]
AML1.Control-6.smooth.chr13.cher2	Control	13	30066691	30067992	AML1.Control-6 smooth	1.25967	2.0856	MTUS2	23281	ENSG00000132938	29598748	30077892	1	protein_coding	microtubule associated tumor suppressor candidate 2 [Source:HGNC Symbol;Acc:20595]
AML1.Control-6.smooth.chr13.cher4	Control	13	30884453	30885143	AML1.Control-6 smooth	1.27243	0.755359	KATNAL1	84056	ENSG00000102781	30776767	30881621	-1	protein_coding	katanin p60 subunit A-like 1 [Source:HGNC Symbol;Acc:28361]
AML1.Control-6.smooth.chr13.cher5	Control	13	30944142	30944668	AML1.Control-6 smooth	1.586	2.43137	LINC00426	100188949	ENSG00000238121	30914407	30951282	-1	lincRNA	long intergenic non-protein coding RNA 426 [Source:HGNC Symbol;Acc:42761]
AML1.Control-6.smooth.chr13.cher8	Control	13	32601364	32601874	AML1.Control-6 smooth	2.06838	3.26347	FRY	10129	ENSG00000073910	32605437	32870794	1	protein_coding	furry homolog (Drosophila) [Source:HGNC Symbol;Acc:20367]
AML1.Control-6.smooth.chr13.cher9	Control	13	33782680	33783368	AML1.Control-6 smooth	1.16555	1.12429	STARD13	90627	ENSG00000133121	33677307	33924767	-1	protein_coding	StAR-related lipid transfer (START) domain containing 13 [Source:HGNC Symbol;Acc:19164]
AML1.Control-6.smooth.chr13.cher10	Control	13	41055800	41056598	AML1.Control-6 smooth	1.63352	5.37407	RP11-350A18.1	646982	ENSG00000215483	41025131	41055143	-1	lincRNA
AML1.Control-6.smooth.chr13.cher11	Control	13	42535976	42536460	AML1.Control-6 smooth	1.01736	0.216218	KIAA0564	23078	ENSG00000102763	42140961	42535256	-1	protein_coding	KIAA0564 [Source:HGNC Symbol;Acc:29071]
AML1.Control-6.smooth.chr13.cher12	Control	13	45996862	45997443	AML1.Control-6 smooth	1.23921	1.74732	SLC25A30	253512	ENSG00000174032	45967451	45992590	-1	protein_coding	solute carrier family 25, member 30 [Source:HGNC Symbol;Acc:27371]
AML1.Control-6.smooth.chr13.cher13	Control	13	46276998	46277502	AML1.Control-6 smooth	1.10529	0.65123	SPERT	220082	ENSG00000174015	46276446	46288694	1	protein_coding	spermatid associated [Source:HGNC Symbol;Acc:30720]
AML1.Control-6.smooth.chr13.cher14	Control	13	47129166	47129760	AML1.Control-6 smooth	1.58396	3.88932	LRCH1	23143	ENSG00000136141	47127303	47325710	1	protein_coding	leucine-rich repeats and calponin homology (CH) domain containing 1 [Source:HGNC Symbol;Acc:20309]
AML1.Control-6.smooth.chr13.cher15	Control	13	47472772	47473731	AML1.Control-6 smooth	1.32671	2.92705	HTR2A	3356	ENSG00000102468	47407513	47471169	-1	protein_coding	5-hydroxytryptamine (serotonin) receptor 2A, G protein-coupled [Source:HGNC Symbol;Acc:5293]
AML1.Control-6.smooth.chr13.cher16	Control	13	48878742	48879445	AML1.Control-6 smooth	1.14496	0.791305	LINC00441	100862704	ENSG00000231473	48870649	48877797	-1	lincRNA	long intergenic non-protein coding RNA 441 [Source:HGNC Symbol;Acc:42778]
AML1.Control-6.smooth.chr13.cher16	Control	13	48878742	48879445	AML1.Control-6 smooth	1.14496	0.791305	RB1	5925	ENSG00000139687	48877883	49056122	1	protein_coding	retinoblastoma 1 [Source:HGNC Symbol;Acc:9884]
AML1.Control-6.smooth.chr13.cher17	Control	13	50071272	50072068	AML1.Control-6 smooth	1.75931	6.07717	PHF11	51131	ENSG00000136147	50069746	50103123	1	protein_coding	PHD finger protein 11 [Source:HGNC Symbol;Acc:17024]
AML1.Control-6.smooth.chr13.cher18	Control	13	50369610	50370406	AML1.Control-6 smooth	1.24267	1.76601	KPNA3	3839	ENSG00000102753	50273447	50367057	-1	protein_coding	karyopherin alpha 3 (importin alpha 4) [Source:HGNC Symbol;Acc:6396]
AML1.Control-6.smooth.chr13.cher19	Control	13	53423132	53423906	AML1.Control-6 smooth	1.87648	5.16389	PCDH8	5100	ENSG00000136099	53418109	53422775	-1	protein_coding	protocadherin 8 [Source:HGNC Symbol;Acc:8660]
AML1.Control-6.smooth.chr13.cher20	Control	13	74570340	74571039	AML1.Control-6 smooth	1.37545	1.3691	KLF12	11278	ENSG00000118922	74260226	74708394	-1	protein_coding	Kruppel-like factor 12 [Source:HGNC Symbol;Acc:6346]
AML1.Control-6.smooth.chr13.cher21	Control	13	78107708	78108510	AML1.Control-6 smooth	1.40566	2.11867	SCEL	8796	ENSG00000136155	78109809	78219398	1	protein_coding	sciellin [Source:HGNC Symbol;Acc:10573]
AML1.Control-6.smooth.chr13.cher22	Control	13	78311688	78312292	AML1.Control-6 smooth	1.54881	3.67196	SLAIN1	122060	ENSG00000139737	78272023	78338377	1	protein_coding	SLAIN motif family, member 1 [Source:HGNC Symbol;Acc:26387]
AML1.Control-6.smooth.chr13.cher23	Control	13	79180368	79180922	AML1.Control-6 smooth	1.25402	1.21988	POU4F1	5457	ENSG00000152192	79173227	79177673	-1	protein_coding	POU class 4 homeobox 1 [Source:HGNC Symbol;Acc:9218]
AML1.Control-6.smooth.chr13.cher23	Control	13	79180368	79180922	AML1.Control-6 smooth	1.25402	1.21988	POU4F1-AS1	100874222	ENSG00000234377	79152611	79193239	1	antisense	POU4F1 antisense RNA 1 (non-protein coding) [Source:HGNC Symbol;Acc:42700]
AML1.Control-6.smooth.chr13.cher24	Control	13	95137552	95138062	AML1.Control-6 smooth	1.09925	0.420773	DCT	1638	ENSG00000080166	95090830	95131936	-1	protein_coding	dopachrome tautomerase (dopachrome delta-isomerase, tyrosine-related protein 2) [Source:HGNC Symbol;Acc:2709]
AML1.Control-6.smooth.chr13.cher25	Control	13	99849264	99849744	AML1.Control-6 smooth	1.39092	2.16876	GAPDHP22	NA	ENSG00000234005	99842833	99843245	-1	pseudogene	glyceraldehyde 3 phosphate dehydrogenase pseudogene 22 [Source:HGNC Symbol;Acc:37774]
AML1.Control-6.smooth.chr13.cher25	Control	13	99849264	99849744	AML1.Control-6 smooth	1.39092	2.16876	UBAC2	337867	ENSG00000134882	99853028	100038688	1	protein_coding	UBA domain containing 2 [Source:HGNC Symbol;Acc:20486]
AML1.Control-6.smooth.chr13.cher26	Control	13	99967278	99967810	AML1.Control-6 smooth	1.09789	0.668929	UBAC2-IT1	NA	ENSG00000203341	99970408	99971209	1	sense_intronic	UBAC2 intronic transcript 1 (non-protein coding) [Source:HGNC Symbol;Acc:39685]
AML1.Control-6.smooth.chr13.cher26	Control	13	99967278	99967810	AML1.Control-6 smooth	1.09789	0.668929	UBAC2	337867	ENSG00000134882	99853028	100038688	1	protein_coding	UBA domain containing 2 [Source:HGNC Symbol;Acc:20486]
AML1.Control-6.smooth.chr13.cher27	Control	13	111801732	111802246	AML1.Control-6 smooth	1.35892	0.648288	ARHGEF7-AS1	NA	ENSG00000227352	111796652	111797080	-1	antisense	ARHGEF7 antisense RNA 1 (non-protein coding) [Source:HGNC Symbol;Acc:39816]
AML1.Control-6.smooth.chr13.cher27	Control	13	111801732	111802246	AML1.Control-6 smooth	1.35892	0.648288	ARHGEF7	8874	ENSG00000102606	111766906	111958084	1	protein_coding	Rho guanine nucleotide exchange factor (GEF) 7 [Source:HGNC Symbol;Acc:15607]
AML1.Control-6.smooth.chr13.cher28	Control	13	113243670	113244268	AML1.Control-6 smooth	1.04758	0.266133	TUBGCP3	10426	ENSG00000126216	113139325	113242481	-1	protein_coding	tubulin, gamma complex associated protein 3 [Source:HGNC Symbol;Acc:18598]
AML1.Control-6.smooth.chr13.cher29	Control	13	113712194	113712820	AML1.Control-6 smooth	1.1866	0.750059	MCF2L	23263	ENSG00000126217	113548692	113754053	1	protein_coding	MCF.2 cell line derived transforming sequence-like [Source:HGNC Symbol;Acc:14576]
AML1.Control-6.smooth.chr13.cher30	Control	13	114552772	114553276	AML1.Control-6 smooth	1.04842	0.379297	GAS6	2621	ENSG00000183087	114523524	114567046	-1	protein_coding	growth arrest-specific 6 [Source:HGNC Symbol;Acc:4168]
AML1.Control-6.smooth.chr14.cher1	Control	14	20862976	20863504	AML1.Control-6 smooth	1.36102	1.16146	TEP1	7011	ENSG00000129566	20833826	20881588	-1	protein_coding	telomerase-associated protein 1 [Source:HGNC Symbol;Acc:11726]
AML1.Control-6.smooth.chr14.cher2	Control	14	20923656	20924564	AML1.Control-6 smooth	1.51817	3.78652	OSGEP	55644	ENSG00000092094	20914570	20923264	-1	protein_coding	O-sialoglycoprotein endopeptidase [Source:HGNC Symbol;Acc:18028]
AML1.Control-6.smooth.chr14.cher2	Control	14	20923656	20924564	AML1.Control-6 smooth	1.51817	3.78652	APEX1	328	ENSG00000100823	20923350	20925927	1	protein_coding	APEX nuclease (multifunctional DNA repair enzyme) 1 [Source:HGNC Symbol;Acc:587]
AML1.Control-6.smooth.chr14.cher3	Control	14	20947460	20947960	AML1.Control-6 smooth	1.34825	1.47167	RP11-203M5.8	NA	ENSG00000258908	20942948	20945248	-1	lincRNA
AML1.Control-6.smooth.chr14.cher4	Control	14	21523692	21524178	AML1.Control-6 smooth	1.07735	0.353914	NDRG2	57447	ENSG00000165795	21484922	21539031	-1	protein_coding	NDRG family member 2 [Source:HGNC Symbol;Acc:14460]
AML1.Control-6.smooth.chr14.cher4	Control	14	21523692	21524178	AML1.Control-6 smooth	1.07735	0.353914	RNASE8	122665	ENSG00000173431	21525981	21526614	1	protein_coding	ribonuclease, RNase A family, 8 [Source:HGNC Symbol;Acc:19277]
AML1.Control-6.smooth.chr14.cher6	Control	14	22185694	22186492	AML1.Control-6 smooth	1.26184	1.88841	AE000658.31	NA	ENSG00000248358	22183018	22184486	-1	lincRNA
AML1.Control-6.smooth.chr14.cher6	Control	14	22185694	22186492	AML1.Control-6 smooth	1.26184	1.88841	TRAV3	NA	ENSG00000211777	22191960	22192568	1	TR_V_gene	T cell receptor alpha variable 3 (gene/pseudogene) [Source:HGNC Symbol;Acc:12128]
AML1.Control-6.smooth.chr14.cher7	Control	14	22508212	22508708	AML1.Control-6 smooth	1.10293	0.397029	TRAV20	NA	ENSG00000211800	22508840	22509399	1	TR_V_gene	T cell receptor alpha variable 20 [Source:HGNC Symbol;Acc:12117]
AML1.Control-6.smooth.chr14.cher8	Control	14	23073924	23074738	AML1.Control-6 smooth	1.84595	6.24167	AL160314.1	NA	ENSG00000228313	23064715	23067855	-1	protein_coding	Uncharacterized protein [Source:UniProtKB/TrEMBL;Acc:F5H6S2]
AML1.Control-6.smooth.chr14.cher8	Control	14	23073924	23074738	AML1.Control-6 smooth	1.84595	6.24167	ABHD4	63874	ENSG00000100439	23067146	23081265	1	protein_coding	abhydrolase domain containing 4 [Source:HGNC Symbol;Acc:20154]
AML1.Control-6.smooth.chr14.cher9	Control	14	23391176	23391806	AML1.Control-6 smooth	1.19872	0.900135	RBM23	55147	ENSG00000100461	23369854	23388396	-1	protein_coding	RNA binding motif protein 23 [Source:HGNC Symbol;Acc:20155]
AML1.Control-6.smooth.chr14.cher9	Control	14	23391176	23391806	AML1.Control-6 smooth	1.19872	0.900135	PRMT5	10419	ENSG00000100462	23389720	23398794	-1	protein_coding	protein arginine methyltransferase 5 [Source:HGNC Symbol;Acc:10894]
AML1.Control-6.smooth.chr14.cher9	Control	14	23391176	23391806	AML1.Control-6 smooth	1.19872	0.900135	PRMT5-AS1	NA	ENSG00000237054	23388665	23392610	1	antisense	PRMT5 antisense RNA 1 (non-protein coding) [Source:HGNC Symbol;Acc:40533]
AML1.Control-6.smooth.chr14.cher10	Control	14	23453792	23455086	AML1.Control-6 smooth	1.27976	3.45968	RP11-298I3.5	NA	ENSG00000259132	23415479	23451467	-1	protein_coding	Uncharacterized protein [Source:UniProtKB/TrEMBL;Acc:G3V2T6]
AML1.Control-6.smooth.chr14.cher10	Control	14	23453792	23455086	AML1.Control-6 smooth	1.27976	3.45968	AJUBA	84962	ENSG00000129474	23440383	23451851	-1	protein_coding	ajuba LIM protein [Source:HGNC Symbol;Acc:20250]
AML1.Control-6.smooth.chr14.cher10	Control	14	23453792	23455086	AML1.Control-6 smooth	1.27976	3.45968	RP11-298I3.4	NA	ENSG00000258457	23451907	23468287	1	antisense
AML1.Control-6.smooth.chr14.cher11	Control	14	23651378	23651908	AML1.Control-6 smooth	1.1124	0.710362	C14orf164	100507650	ENSG00000215277	23654525	23742686	1	protein_coding	chromosome 14 open reading frame 164 [Source:HGNC Symbol;Acc:20438]
AML1.Control-6.smooth.chr14.cher11	Control	14	23651378	23651908	AML1.Control-6 smooth	1.1124	0.710362	SLC7A8	23428	ENSG00000092068	23594504	23652883	-1	protein_coding	solute carrier family 7 (amino acid transporter light chain, L system), member 8 [Source:HGNC Symbol;Acc:11066]
AML1.Control-6.smooth.chr14.cher12	Control	14	24101306	24101922	AML1.Control-6 smooth	1.2941	1.85937	DHRS2	10202	ENSG00000100867	24099324	24114848	1	protein_coding	dehydrogenase/reductase (SDR family) member 2 [Source:HGNC Symbol;Acc:18349]
AML1.Control-6.smooth.chr14.cher13	Control	14	24706418	24707002	AML1.Control-6 smooth	1.26892	1.53639	NEDD8-MDP1	100528064	ENSG00000255526	24683302	24701558	-1	protein_coding	NEDD8-MDP1 readthrough [Source:HGNC Symbol;Acc:39551]
AML1.Control-6.smooth.chr14.cher13	Control	14	24706418	24707002	AML1.Control-6 smooth	1.26892	1.53639	NEDD8	4738	ENSG00000129559	24686058	24701660	-1	protein_coding	neural precursor cell expressed, developmentally down-regulated 8 [Source:HGNC Symbol;Acc:7732]
AML1.Control-6.smooth.chr14.cher13	Control	14	24706418	24707002	AML1.Control-6 smooth	1.26892	1.53639	GMPR2	51292	ENSG00000100938	24701628	24708448	1	protein_coding	guanosine monophosphate reductase 2 [Source:HGNC Symbol;Acc:4377]
AML1.Control-6.smooth.chr14.cher14	Control	14	24708118	24708712	AML1.Control-6 smooth	1.13441	0.800792	NEDD8-MDP1	100528064	ENSG00000255526	24683302	24701558	-1	protein_coding	NEDD8-MDP1 readthrough [Source:HGNC Symbol;Acc:39551]
AML1.Control-6.smooth.chr14.cher14	Control	14	24708118	24708712	AML1.Control-6 smooth	1.13441	0.800792	NEDD8	4738	ENSG00000129559	24686058	24701660	-1	protein_coding	neural precursor cell expressed, developmentally down-regulated 8 [Source:HGNC Symbol;Acc:7732]
AML1.Control-6.smooth.chr14.cher14	Control	14	24708118	24708712	AML1.Control-6 smooth	1.13441	0.800792	GMPR2	51292	ENSG00000100938	24701628	24708448	1	protein_coding	guanosine monophosphate reductase 2 [Source:HGNC Symbol;Acc:4377]
AML1.Control-6.smooth.chr14.cher15	Control	14	24806450	24807146	AML1.Control-6 smooth	1.51396	3.48931	ADCY4	196883	ENSG00000129467	24787555	24804299	-1	protein_coding	adenylate cyclase 4 [Source:HGNC Symbol;Acc:235]
AML1.Control-6.smooth.chr14.cher15	Control	14	24806450	24807146	AML1.Control-6 smooth	1.51396	3.48931	RP11-934B9.3	NA	ENSG00000258973	24801516	24806588	-1	protein_coding	Uncharacterized protein [Source:UniProtKB/TrEMBL;Acc:G3V2L1]
AML1.Control-6.smooth.chr14.cher15	Control	14	24806450	24807146	AML1.Control-6 smooth	1.51396	3.48931	RIPK3	11035	ENSG00000129465	24805227	24809251	-1	protein_coding	receptor-interacting serine-threonine kinase 3 [Source:HGNC Symbol;Acc:10021]
AML1.Control-6.smooth.chr14.cher16	Control	14	25078010	25078514	AML1.Control-6 smooth	1.19488	1.03967	GZMH	2999	ENSG00000100450	25075686	25078905	-1	protein_coding	granzyme H (cathepsin G-like 2, protein h-CCPX) [Source:HGNC Symbol;Acc:4710]
AML1.Control-6.smooth.chr14.cher17	Control	14	35186792	35187446	AML1.Control-6 smooth	1.47132	2.56102	CFL2	1073	ENSG00000165410	35179593	35184029	-1	protein_coding	cofilin 2 (muscle) [Source:HGNC Symbol;Acc:1875]
AML1.Control-6.smooth.chr14.cher18	Control	14	36005376	36006084	AML1.Control-6 smooth	1.26679	1.37805	INSM2	84684	ENSG00000168348	36003248	36006260	1	protein_coding	insulinoma-associated 2 [Source:HGNC Symbol;Acc:17539]
AML1.Control-6.smooth.chr14.cher19	Control	14	36985069	36985544	AML1.Control-6 smooth	1.22648	1.28038	NKX2-1-AS1	100506237	ENSG00000253563	36988483	36992221	1	antisense	NKX2-1 antisense RNA 1 (non-protein coding) [Source:HGNC Symbol;Acc:40585]
AML1.Control-6.smooth.chr14.cher19	Control	14	36985069	36985544	AML1.Control-6 smooth	1.22648	1.28038	SFTA3	253970	ENSG00000229415	36942493	36983034	-1	protein_coding	surfactant associated 3 [Source:HGNC Symbol;Acc:18387]
AML1.Control-6.smooth.chr14.cher20	Control	14	39637860	39638448	AML1.Control-6 smooth	1.20986	1.38781	PNN	5411	ENSG00000100941	39644387	39652422	1	protein_coding	pinin, desmosome associated protein [Source:HGNC Symbol;Acc:9162]
AML1.Control-6.smooth.chr14.cher20	Control	14	39637860	39638448	AML1.Control-6 smooth	1.20986	1.38781	TRAPPC6B	122553	ENSG00000182400	39617015	39639736	-1	protein_coding	trafficking protein particle complex 6B [Source:HGNC Symbol;Acc:23066]
AML1.Control-6.smooth.chr14.cher21	Control	14	42076381	42076868	AML1.Control-6 smooth	1.0938	0.512398	CTD-2298J14.2	NA	ENSG00000258636	42057064	42074059	-1	lincRNA
AML1.Control-6.smooth.chr14.cher21	Control	14	42076381	42076868	AML1.Control-6 smooth	1.0938	0.512398	LRFN5	145581	ENSG00000165379	42076773	42373752	1	protein_coding	leucine rich repeat and fibronectin type III domain containing 5 [Source:HGNC Symbol;Acc:20360]
AML1.Control-6.smooth.chr14.cher22	Control	14	50060456	50060969	AML1.Control-6 smooth	1.45866	2.41744	RHOQP1	NA	ENSG00000258568	50066712	50067290	1	pseudogene	ras homolog family member Q pseudogene 1 [Source:HGNC Symbol;Acc:20003]
AML1.Control-6.smooth.chr14.cher22	Control	14	50060456	50060969	AML1.Control-6 smooth	1.45866	2.41744	LRR1	122769	ENSG00000165501	50065415	50081390	1	protein_coding	leucine rich repeat protein 1 [Source:HGNC Symbol;Acc:19742]
AML1.Control-6.smooth.chr14.cher22	Control	14	50060456	50060969	AML1.Control-6 smooth	1.45866	2.41744	Y_RNA	NA	ENSG00000252919	50058954	50059055	-1	misc_RNA	Y RNA [Source:RFAM;Acc:RF00019]
AML1.Control-6.smooth.chr14.cher23	Control	14	50233633	50234242	AML1.Control-6 smooth	1.59081	2.16618	KLHDC2	23588	ENSG00000165516	50234326	50249909	1	protein_coding	kelch domain containing 2 [Source:HGNC Symbol;Acc:20231]
AML1.Control-6.smooth.chr14.cher24	Control	14	50285250	50285724	AML1.Control-6 smooth	1.52473	3.04023	NEMF	9147	ENSG00000165525	50249997	50319921	-1	protein_coding	nuclear export mediator factor [Source:HGNC Symbol;Acc:10663]
AML1.Control-6.smooth.chr14.cher27	Control	14	55657538	55658144	AML1.Control-6 smooth	1.20546	1.34937	DLGAP5	9787	ENSG00000126787	55614830	55658396	-1	protein_coding	discs, large (Drosophila) homolog-associated protein 5 [Source:HGNC Symbol;Acc:16864]
AML1.Control-6.smooth.chr14.cher28	Control	14	57851618	57852225	AML1.Control-6 smooth	1.26544	1.88272	NAA30	122830	ENSG00000139977	57857262	57882635	1	protein_coding	N(alpha)-acetyltransferase 30, NatC catalytic subunit [Source:HGNC Symbol;Acc:19844]
AML1.Control-6.smooth.chr14.cher29	Control	14	60957400	60957984	AML1.Control-6 smooth	1.21021	1.28531	C14orf39	317761	ENSG00000179008	60863187	60982261	-1	protein_coding	chromosome 14 open reading frame 39 [Source:HGNC Symbol;Acc:19849]
AML1.Control-6.smooth.chr14.cher30	Control	14	67956900	67957469	AML1.Control-6 smooth	1.2019	1.26388	TMEM229B	161145	ENSG00000198133	67913801	68000456	-1	protein_coding	transmembrane protein 229B [Source:HGNC Symbol;Acc:20130]
AML1.Control-6.smooth.chr14.cher31	Control	14	67979748	67980258	AML1.Control-6 smooth	1.07396	0.423568	TMEM229B	161145	ENSG00000198133	67913801	68000456	-1	protein_coding	transmembrane protein 229B [Source:HGNC Symbol;Acc:20130]
AML1.Control-6.smooth.chr14.cher32	Control	14	67985734	67986250	AML1.Control-6 smooth	1.29782	1.20162	TMEM229B	161145	ENSG00000198133	67913801	68000456	-1	protein_coding	transmembrane protein 229B [Source:HGNC Symbol;Acc:20130]
AML1.Control-6.smooth.chr14.cher33	Control	14	68191446	68192044	AML1.Control-6 smooth	1.13894	0.644599	RDH12	145226	ENSG00000139988	68168603	68201169	1	protein_coding	retinol dehydrogenase 12 (all-trans/9-cis/11-cis) [Source:HGNC Symbol;Acc:19977]
AML1.Control-6.smooth.chr14.cher34	Control	14	70545160	70545628	AML1.Control-6 smooth	1.1072	0.68502	SLC8A3	6547	ENSG00000100678	70510934	70655787	-1	protein_coding	solute carrier family 8 (sodium/calcium exchanger), member 3 [Source:HGNC Symbol;Acc:11070]
AML1.Control-6.smooth.chr14.cher35	Control	14	73491066	73491674	AML1.Control-6 smooth	1.00072	0.0786421	ZFYVE1	53349	ENSG00000165861	73436159	73493920	-1	protein_coding	zinc finger, FYVE domain containing 1 [Source:HGNC Symbol;Acc:13180]
AML1.Control-6.smooth.chr14.cher36	Control	14	77284266	77284780	AML1.Control-6 smooth	1.05072	0.426927	ANGEL1	23357	ENSG00000013523	77253588	77292589	-1	protein_coding	angel homolog 1 (Drosophila) [Source:HGNC Symbol;Acc:19961]
AML1.Control-6.smooth.chr14.cher37	Control	14	78229521	78230244	AML1.Control-6 smooth	1.31561	2.08821	SNW1	22938	ENSG00000100603	78183942	78227550	-1	protein_coding	SNW domain containing 1 [Source:HGNC Symbol;Acc:16696]
AML1.Control-6.smooth.chr14.cher37	Control	14	78229521	78230244	AML1.Control-6 smooth	1.31561	2.08821	C14orf178	283579	ENSG00000197734	78227173	78236085	1	protein_coding	chromosome 14 open reading frame 178 [Source:HGNC Symbol;Acc:26385]
AML1.Control-6.smooth.chr14.cher39	Control	14	90521964	90522642	AML1.Control-6 smooth	1.32832	1.32103	KCNK13	56659	ENSG00000152315	90528109	90652201	1	protein_coding	potassium channel, subfamily K, member 13 [Source:HGNC Symbol;Acc:6275]
AML1.Control-6.smooth.chr14.cher40	Control	14	93391345	93392016	AML1.Control-6 smooth	1.76955	5.57421	CHGA	1113	ENSG00000100604	93389425	93401638	1	protein_coding	chromogranin A (parathyroid secretory protein 1) [Source:HGNC Symbol;Acc:1929]
AML1.Control-6.smooth.chr14.cher41	Control	14	94390304	94390800	AML1.Control-6 smooth	1.1059	0.280918	FAM181A	90050	ENSG00000140067	94385240	94395954	1	protein_coding	family with sequence similarity 181, member A [Source:HGNC Symbol;Acc:20491]
AML1.Control-6.smooth.chr14.cher41	Control	14	94390304	94390800	AML1.Control-6 smooth	1.1059	0.280918	FAM181A-AS1	283592	ENSG00000258584	94371076	94393412	-1	processed_transcript	FAM181A antisense RNA 1 (non-protein coding) [Source:HGNC Symbol;Acc:20133]
AML1.Control-6.smooth.chr14.cher43	Control	14	100532594	100533082	AML1.Control-6 smooth	1.03785	0.322337	EVL	51466	ENSG00000196405	100437786	100610573	1	protein_coding	Enah/Vasp-like [Source:HGNC Symbol;Acc:20234]
AML1.Control-6.smooth.chr14.cher44	Control	14	101290806	101291286	AML1.Control-6 smooth	1.16193	0.990614	MEG3	55384	ENSG00000214548	101245747	101327368	1	lincRNA	maternally expressed 3 (non-protein coding) [Source:HGNC Symbol;Acc:14575]
AML1.Control-6.smooth.chr14.cher45	Control	14	101330664	101331464	AML1.Control-6 smooth	1.33096	2.69121	RP11-123M6.2	NA	ENSG00000258663	101300769	101327363	-1	non_coding
AML1.Control-6.smooth.chr14.cher45	Control	14	101330664	101331464	AML1.Control-6 smooth	1.33096	2.69121	MIR493	574450	ENSG00000207989	101335397	101335485	1	miRNA	microRNA 493 [Source:HGNC Symbol;Acc:32082]
AML1.Control-6.smooth.chr14.cher46	Control	14	101369032	101370026	AML1.Control-6 smooth	1.57323	3.58749	MEG8	692215	ENSG00000258399	101361107	101402336	1	lincRNA	maternally expressed 8 (non-protein coding) [Source:HGNC Symbol;Acc:14574]
AML1.Control-6.smooth.chr14.cher46	Control	14	101369032	101370026	AML1.Control-6 smooth	1.57323	3.58749	AL117190.1	NA	ENSG00000221077	101369934	101370053	1	miRNA
AML1.Control-6.smooth.chr14.cher47	Control	14	102712668	102713360	AML1.Control-6 smooth	1.4275	2.28106	MOK	5891	ENSG00000080823	102690837	102771537	-1	protein_coding	MOK protein kinase [Source:HGNC Symbol;Acc:9833]
AML1.Control-6.smooth.chr15.cher2	Control	15	31286758	31287552	AML1.Control-6 smooth	1.19883	1.35712	RP11-348B17.1	NA	ENSG00000259720	31294216	31334505	1	antisense
AML1.Control-6.smooth.chr15.cher2	Control	15	31286758	31287552	AML1.Control-6 smooth	1.19883	1.35712	MTMR10	54893	ENSG00000166912	31231144	31283810	-1	protein_coding	myotubularin related protein 10 [Source:HGNC Symbol;Acc:25999]
AML1.Control-6.smooth.chr15.cher3	Control	15	42106374	42107264	AML1.Control-6 smooth	1.07605	0.858512	MAPKBP1	23005	ENSG00000137802	42066632	42120053	1	protein_coding	mitogen-activated protein kinase binding protein 1 [Source:HGNC Symbol;Acc:29536]
AML1.Control-6.smooth.chr15.cher4	Control	15	42501093	42501616	AML1.Control-6 smooth	1.04887	0.407948	VPS39	23339	ENSG00000166887	42450899	42500514	-1	protein_coding	vacuolar protein sorting 39 homolog (S. cerevisiae) [Source:HGNC Symbol;Acc:20593]
AML1.Control-6.smooth.chr15.cher4	Control	15	42501093	42501616	AML1.Control-6 smooth	1.04887	0.407948	RP11-546B15.1	NA	ENSG00000261002	42500611	42519188	1	antisense
AML1.Control-6.smooth.chr15.cher5	Control	15	43667640	43668238	AML1.Control-6 smooth	1.19213	1.1862	ZSCAN29	146050	ENSG00000140265	43650370	43663223	-1	protein_coding	zinc finger and SCAN domain containing 29 [Source:HGNC Symbol;Acc:26673]
AML1.Control-6.smooth.chr15.cher5	Control	15	43667640	43668238	AML1.Control-6 smooth	1.19213	1.1862	TUBGCP4	27229	ENSG00000137822	43661419	43699293	1	protein_coding	tubulin, gamma complex associated protein 4 [Source:HGNC Symbol;Acc:16691]
AML1.Control-6.smooth.chr15.cher7	Control	15	44961671	44962258	AML1.Control-6 smooth	1.13436	0.773183	SPG11	80208	ENSG00000104133	44854894	44955876	-1	protein_coding	spastic paraplegia 11 (autosomal recessive) [Source:HGNC Symbol;Acc:11226]
AML1.Control-6.smooth.chr15.cher7	Control	15	44961671	44962258	AML1.Control-6 smooth	1.13436	0.773183	PATL2	197135	ENSG00000229474	44957930	45003514	-1	protein_coding	protein associated with topoisomerase II homolog 2 (yeast) [Source:HGNC Symbol;Acc:33630]
AML1.Control-6.smooth.chr15.cher8	Control	15	49103787	49104260	AML1.Control-6 smooth	1.14617	0.976304	CEP152	22995	ENSG00000103995	49005125	49103343	-1	protein_coding	centrosomal protein 152kDa [Source:HGNC Symbol;Acc:29298]
AML1.Control-6.smooth.chr15.cher8	Control	15	49103787	49104260	AML1.Control-6 smooth	1.14617	0.976304	RP11-485O10.3	NA	ENSG00000259700	49102898	49104106	1	processed_transcript
AML1.Control-6.smooth.chr15.cher9	Control	15	51629353	51630248	AML1.Control-6 smooth	1.4576	3.33941	GLDN	342035	ENSG00000186417	51633826	51700210	1	protein_coding	gliomedin [Source:HGNC Symbol;Acc:29514]
AML1.Control-6.smooth.chr15.cher9	Control	15	51629353	51630248	AML1.Control-6 smooth	1.4576	3.33941	CYP19A1	1588	ENSG00000137869	51500254	51630807	-1	protein_coding	cytochrome P450, family 19, subfamily A, polypeptide 1 [Source:HGNC Symbol;Acc:2594]
AML1.Control-6.smooth.chr15.cher10	Control	15	55563010	55563941	AML1.Control-6 smooth	1.46067	2.72555	RAB27A	5873	ENSG00000069974	55495164	55611311	-1	protein_coding	RAB27A, member RAS oncogene family [Source:HGNC Symbol;Acc:9766]
AML1.Control-6.smooth.chr15.cher11	Control	15	56292012	56292629	AML1.Control-6 smooth	1.11724	0.859941	NEDD4	4734	ENSG00000069869	56119120	56285944	-1	protein_coding	neural precursor cell expressed, developmentally down-regulated 4, E3 ubiquitin protein ligase [Source:HGNC Symbol;Acc:7727]
AML1.Control-6.smooth.chr15.cher13	Control	15	58723923	58724700	AML1.Control-6 smooth	1.34901	2.52477	LIPC	3990	ENSG00000166035	58702768	58861151	1	protein_coding	lipase, hepatic [Source:HGNC Symbol;Acc:6619]
AML1.Control-6.smooth.chr15.cher14	Control	15	59499568	59500166	AML1.Control-6 smooth	1.4242	1.79395	MYO1E	4643	ENSG00000157483	59427113	59665099	-1	protein_coding	myosin IE [Source:HGNC Symbol;Acc:7599]
AML1.Control-6.smooth.chr15.cher14	Control	15	59499568	59500166	AML1.Control-6 smooth	1.4242	1.79395	LDHAL6B	92483	ENSG00000171989	59499042	59500705	1	protein_coding	lactate dehydrogenase A-like 6B [Source:HGNC Symbol;Acc:21481]
AML1.Control-6.smooth.chr15.cher15	Control	15	59500794	59501398	AML1.Control-6 smooth	1.27622	0.980788	MYO1E	4643	ENSG00000157483	59427113	59665099	-1	protein_coding	myosin IE [Source:HGNC Symbol;Acc:7599]
AML1.Control-6.smooth.chr15.cher16	Control	15	59903678	59904978	AML1.Control-6 smooth	1.54012	5.16283	GCNT3	9245	ENSG00000140297	59887074	59932438	1	protein_coding	glucosaminyl (N-acetyl) transferase 3, mucin type [Source:HGNC Symbol;Acc:4205]
AML1.Control-6.smooth.chr15.cher17	Control	15	63332372	63332878	AML1.Control-6 smooth	1.37651	2.23474	TPM1	7168	ENSG00000140416	63334831	63364114	1	protein_coding	tropomyosin 1 (alpha) [Source:HGNC Symbol;Acc:12010]
AML1.Control-6.smooth.chr15.cher18	Control	15	64387234	64387832	AML1.Control-6 smooth	1.66933	3.87574	FAM96A	84191	ENSG00000166797	64364758	64386217	-1	protein_coding	family with sequence similarity 96, member A [Source:HGNC Symbol;Acc:26235]
AML1.Control-6.smooth.chr15.cher18	Control	15	64387234	64387832	AML1.Control-6 smooth	1.66933	3.87574	SNX1	6642	ENSG00000028528	64386322	64438289	1	protein_coding	sorting nexin 1 [Source:HGNC Symbol;Acc:11172]
AML1.Control-6.smooth.chr15.cher19	Control	15	65808954	65809454	AML1.Control-6 smooth	1.3075	1.85013	DPP8	54878	ENSG00000074603	65734801	65810042	-1	protein_coding	dipeptidyl-peptidase 8 [Source:HGNC Symbol;Acc:16490]
AML1.Control-6.smooth.chr15.cher20	Control	15	66552190	66553000	AML1.Control-6 smooth	1.65326	3.80137	MEGF11	84465	ENSG00000157890	66187417	66546085	-1	protein_coding	multiple EGF-like-domains 11 [Source:HGNC Symbol;Acc:29635]
AML1.Control-6.smooth.chr15.cher21	Control	15	69454328	69454802	AML1.Control-6 smooth	1.29758	1.69468	GLCE	26035	ENSG00000138604	69452923	69564544	1	protein_coding	glucuronic acid epimerase [Source:HGNC Symbol;Acc:17855]
AML1.Control-6.smooth.chr15.cher22	Control	15	70372970	70373553	AML1.Control-6 smooth	1.51426	2.97727	TLE3	7090	ENSG00000140332	70340129	70390515	-1	protein_coding	transducin-like enhancer of split 3 (E(sp1) homolog, Drosophila) [Source:HGNC Symbol;Acc:11839]
AML1.Control-6.smooth.chr15.cher22	Control	15	70372970	70373553	AML1.Control-6 smooth	1.51426	2.97727	MIR629	693214	ENSG00000207965	70371711	70371807	-1	miRNA	microRNA 629 [Source:HGNC Symbol;Acc:32885]
AML1.Control-6.smooth.chr15.cher23	Control	15	72527036	72527488	AML1.Control-6 smooth	1.16821	0.538905	PKM2	5315	ENSG00000067225	72491370	72524164	-1	protein_coding	pyruvate kinase, muscle [Source:HGNC Symbol;Acc:9021]
AML1.Control-6.smooth.chr15.cher24	Control	15	72558004	72558508	AML1.Control-6 smooth	1.28745	1.40113	PARP6	56965	ENSG00000137817	72533522	72565340	-1	protein_coding	poly (ADP-ribose) polymerase family, member 6 [Source:HGNC Symbol;Acc:26921]
AML1.Control-6.smooth.chr15.cher25	Control	15	74829938	74830730	AML1.Control-6 smooth	1.44671	2.26475	ARID3B	10620	ENSG00000179361	74833518	74890472	1	protein_coding	AT rich interactive domain 3B (BRIGHT-like) [Source:HGNC Symbol;Acc:14350]
AML1.Control-6.smooth.chr15.cher26	Control	15	75837046	75837520	AML1.Control-6 smooth	1.34448	1.64684	AC105036.1	NA	ENSG00000203473	75830020	75830438	-1	pseudogene
AML1.Control-6.smooth.chr15.cher27	Control	15	77364192	77365160	AML1.Control-6 smooth	1.53228	4.75779	TSPAN3	10099	ENSG00000140391	77336359	77376326	-1	protein_coding	tetraspanin 3 [Source:HGNC Symbol;Acc:17752]
AML1.Control-6.smooth.chr15.cher28	Control	15	79388970	79389478	AML1.Control-6 smooth	1.01407	0.183547	RASGRF1	5923	ENSG00000058335	79252289	79383115	-1	protein_coding	Ras protein-specific guanine nucleotide-releasing factor 1 [Source:HGNC Symbol;Acc:9875]
AML1.Control-6.smooth.chr15.cher29	Control	15	79744368	79745282	AML1.Control-6 smooth	1.14581	1.04818	KIAA1024	23251	ENSG00000169330	79724858	79764632	1	protein_coding	KIAA1024 [Source:HGNC Symbol;Acc:29172]
AML1.Control-6.smooth.chr15.cher30	Control	15	80263028	80263908	AML1.Control-6 smooth	1.65267	3.89638	BCL2A1	597	ENSG00000140379	80253231	80263788	-1	protein_coding	BCL2-related protein A1 [Source:HGNC Symbol;Acc:991]
AML1.Control-6.smooth.chr15.cher31	Control	15	81620058	81620549	AML1.Control-6 smooth	1.11028	0.609629	RP11-761I4.3	101929655	ENSG00000259343	81616718	81654378	1	antisense
AML1.Control-6.smooth.chr15.cher31	Control	15	81620058	81620549	AML1.Control-6 smooth	1.11028	0.609629	STARD5	80765	ENSG00000172345	81601394	81616524	-1	protein_coding	StAR-related lipid transfer (START) domain containing 5 [Source:HGNC Symbol;Acc:18065]
AML1.Control-6.smooth.chr15.cher32	Control	15	85661376	85661870	AML1.Control-6 smooth	1.42589	2.30116	PDE8A	5151	ENSG00000073417	85523671	85682376	1	protein_coding	phosphodiesterase 8A [Source:HGNC Symbol;Acc:8793]
AML1.Control-6.smooth.chr15.cher33	Control	15	86340624	86341158	AML1.Control-6 smooth	1.17882	0.763423	KLHL25	64410	ENSG00000183655	86302554	86338261	-1	protein_coding	kelch-like 25 (Drosophila) [Source:HGNC Symbol;Acc:25732]
AML1.Control-6.smooth.chr15.cher34	Control	15	94895441	94895932	AML1.Control-6 smooth	1.43481	2.63684	MCTP2	55784	ENSG00000140563	94774767	95023632	1	protein_coding	multiple C2 domains, transmembrane 2 [Source:HGNC Symbol;Acc:25636]
AML1.Control-6.smooth.chr15.cher35	Control	15	99669754	99670268	AML1.Control-6 smooth	1.06226	0.387509	RP11-6O2.4	NA	ENSG00000261054	99669037	99672011	-1	antisense
AML1.Control-6.smooth.chr15.cher36	Control	15	101453900	101454506	AML1.Control-6 smooth	1.43854	2.26116	LRRK1	79705	ENSG00000154237	101459420	101610317	1	protein_coding	leucine-rich repeat kinase 1 [Source:HGNC Symbol;Acc:18608]
AML1.Control-6.smooth.chr16.cher3	Control	16	4840962	4841672	AML1.Control-6 smooth	1.31835	2.37186	SEPT12	124404	ENSG00000140623	4827615	4838522	-1	protein_coding	septin 12 [Source:HGNC Symbol;Acc:26348]
AML1.Control-6.smooth.chr16.cher4	Control	16	10522074	10522655	AML1.Control-6 smooth	1.82296	3.96576	ATF7IP2	80063	ENSG00000166669	10420291	10577495	1	protein_coding	activating transcription factor 7 interacting protein 2 [Source:HGNC Symbol;Acc:20397]
AML1.Control-6.smooth.chr16.cher5	Control	16	18817608	18818207	AML1.Control-6 smooth	1.14142	0.852402	RP11-1035H13.3	NA	ENSG00000260342	18799385	18812841	-1	protein_coding
AML1.Control-6.smooth.chr16.cher5	Control	16	18817608	18818207	AML1.Control-6 smooth	1.14142	0.852402	ARL6IP1	23204	ENSG00000170540	18802991	18813000	-1	protein_coding	ADP-ribosylation factor-like 6 interacting protein 1 [Source:HGNC Symbol;Acc:697]
AML1.Control-6.smooth.chr16.cher7	Control	16	21665686	21666164	AML1.Control-6 smooth	1.362	1.42886	IGSF6	10261	ENSG00000140749	21652609	21663981	-1	protein_coding	immunoglobulin superfamily, member 6 [Source:HGNC Symbol;Acc:5953]
AML1.Control-6.smooth.chr16.cher7	Control	16	21665686	21666164	AML1.Control-6 smooth	1.362	1.42886	METTL9	51108	ENSG00000197006	21608539	21668794	1	protein_coding	methyltransferase like 9 [Source:HGNC Symbol;Acc:24586]
AML1.Control-6.smooth.chr16.cher8	Control	16	23574872	23575582	AML1.Control-6 smooth	1.33302	1.62955	CTD-2196E14.6	NA	ENSG00000260751	23579994	23580912	1	sense_intronic
AML1.Control-6.smooth.chr16.cher8	Control	16	23574872	23575582	AML1.Control-6 smooth	1.33302	1.62955	EARS2	124454	ENSG00000103356	23533335	23569052	-1	protein_coding	glutamyl-tRNA synthetase 2, mitochondrial (putative) [Source:HGNC Symbol;Acc:29419]
AML1.Control-6.smooth.chr16.cher8	Control	16	23574872	23575582	AML1.Control-6 smooth	1.33302	1.62955	UBFD1	56061	ENSG00000103353	23568392	23585710	1	protein_coding	ubiquitin family domain containing 1 [Source:HGNC Symbol;Acc:30565]
AML1.Control-6.smooth.chr16.cher9	Control	16	24548836	24549365	AML1.Control-6 smooth	1.5356	2.8772	RBBP6	5930	ENSG00000122257	24549014	24584184	1	protein_coding	retinoblastoma binding protein 6 [Source:HGNC Symbol;Acc:9889]
AML1.Control-6.smooth.chr16.cher10	Control	16	24968510	24969010	AML1.Control-6 smooth	1.00711	0.133642	ARHGAP17	55114	ENSG00000140750	24930706	25026987	-1	protein_coding	Rho GTPase activating protein 17 [Source:HGNC Symbol;Acc:18239]
AML1.Control-6.smooth.chr16.cher13	Control	16	26075286	26075864	AML1.Control-6 smooth	1.05031	0.2963	AC093509.2	NA	ENSG00000237140	26074073	26074418	-1	pseudogene
AML1.Control-6.smooth.chr16.cher19	Control	16	31492156	31492862	AML1.Control-6 smooth	2.1161	6.43251	SLC5A2	6524	ENSG00000140675	31494323	31502181	1	protein_coding	solute carrier family 5 (sodium/glucose cotransporter), member 2 [Source:HGNC Symbol;Acc:11037]
AML1.Control-6.smooth.chr16.cher20	Control	16	46916846	46917346	AML1.Control-6 smooth	1.07868	0.427423	GPT2	84706	ENSG00000166123	46918290	46965209	1	protein_coding	glutamic pyruvate transaminase (alanine aminotransferase) 2 [Source:HGNC Symbol;Acc:18062]
AML1.Control-6.smooth.chr16.cher21	Control	16	49863874	49864550	AML1.Control-6 smooth	1.48209	3.19879	ZNF423	23090	ENSG00000102935	49521435	49891830	-1	protein_coding	zinc finger protein 423 [Source:HGNC Symbol;Acc:16762]
AML1.Control-6.smooth.chr16.cher22	Control	16	53479846	53480318	AML1.Control-6 smooth	1.08283	0.578463	RP11-44F14.5	NA	ENSG00000259926	53482660	53483502	1	sense_intronic
AML1.Control-6.smooth.chr16.cher22	Control	16	53479846	53480318	AML1.Control-6 smooth	1.08283	0.578463	RBL2	5934	ENSG00000103479	53467889	53525561	1	protein_coding	retinoblastoma-like 2 (p130) [Source:HGNC Symbol;Acc:9894]
AML1.Control-6.smooth.chr16.cher22	Control	16	53479846	53480318	AML1.Control-6 smooth	1.08283	0.578463	U6	NA	ENSG00000252569	53477140	53477244	-1	snRNA	U6 spliceosomal RNA [Source:RFAM;Acc:RF00026]
AML1.Control-6.smooth.chr16.cher23	Control	16	56777470	56778000	AML1.Control-6 smooth	1.07372	0.523621	NUP93	9688	ENSG00000102900	56764017	56880792	1	protein_coding	nucleoporin 93kDa [Source:HGNC Symbol;Acc:28958]
AML1.Control-6.smooth.chr16.cher25	Control	16	58007354	58007924	AML1.Control-6 smooth	1.48593	3.00176	CNGB1	1258	ENSG00000070729	57917503	58005020	-1	protein_coding	cyclic nucleotide gated channel beta 1 [Source:HGNC Symbol;Acc:2151]
AML1.Control-6.smooth.chr16.cher25	Control	16	58007354	58007924	AML1.Control-6 smooth	1.48593	3.00176	TEPP	374739	ENSG00000159648	58010339	58022020	1	protein_coding	testis, prostate and placenta expressed [Source:HGNC Symbol;Acc:33745]
AML1.Control-6.smooth.chr16.cher26	Control	16	67454876	67455552	AML1.Control-6 smooth	1.40079	1.95013	ZDHHC1	29800	ENSG00000159714	67428322	67450736	-1	protein_coding	zinc finger, DHHC-type containing 1 [Source:HGNC Symbol;Acc:17916]
AML1.Control-6.smooth.chr16.cher27	Control	16	67462576	67463060	AML1.Control-6 smooth	1.15027	0.737004	AC009061.1	NA	ENSG00000203401	67466595	67468931	1	pseudogene
AML1.Control-6.smooth.chr16.cher27	Control	16	67462576	67463060	AML1.Control-6 smooth	1.15027	0.737004	RP11-297D21.3	NA	ENSG00000262839	67466595	67468931	1	lincRNA
AML1.Control-6.smooth.chr16.cher27	Control	16	67462576	67463060	AML1.Control-6 smooth	1.15027	0.737004	HSD11B2	3291	ENSG00000176387	67464555	67471456	1	protein_coding	hydroxysteroid (11-beta) dehydrogenase 2 [Source:HGNC Symbol;Acc:5209]
AML1.Control-6.smooth.chr16.cher28	Control	16	68479528	68480028	AML1.Control-6 smooth	1.21758	1.28889	SMPD3	55512	ENSG00000103056	68392231	68482591	-1	protein_coding	sphingomyelin phosphodiesterase 3, neutral membrane (neutral sphingomyelinase II) [Source:HGNC Symbol;Acc:14240]
AML1.Control-6.smooth.chr16.cher29	Control	16	68592456	68593356	AML1.Control-6 smooth	1.22558	1.73948	RP11-615I2.7	NA	ENSG00000262820	68595964	68601032	1	3prime_overlapping_ncrna
AML1.Control-6.smooth.chr16.cher29	Control	16	68592456	68593356	AML1.Control-6 smooth	1.22558	1.73948	ZFP90	146198	ENSG00000184939	68563993	68609948	1	protein_coding	zinc finger protein 90 homolog (mouse) [Source:HGNC Symbol;Acc:23329]
AML1.Control-6.smooth.chr16.cher30	Control	16	69154504	69155298	AML1.Control-6 smooth	1.09059	0.845932	CHTF8	54921	ENSG00000168802	69151913	69166487	-1	protein_coding	CTF8, chromosome transmission fidelity factor 8 homolog (S. cerevisiae) [Source:HGNC Symbol;Acc:24353]
AML1.Control-6.smooth.chr16.cher30	Control	16	69154504	69155298	AML1.Control-6 smooth	1.09059	0.845932	RP11-123C5.4	NA	ENSG00000263203	69152757	69154331	-1	protein_coding
AML1.Control-6.smooth.chr16.cher31	Control	16	69167768	69168268	AML1.Control-6 smooth	1.09733	0.433357	CHTF8	54921	ENSG00000168802	69151913	69166487	-1	protein_coding	CTF8, chromosome transmission fidelity factor 8 homolog (S. cerevisiae) [Source:HGNC Symbol;Acc:24353]
AML1.Control-6.smooth.chr16.cher31	Control	16	69167768	69168268	AML1.Control-6 smooth	1.09733	0.433357	CIRH1A	84916	ENSG00000141076	69165194	69202941	1	protein_coding	cirrhosis, autosomal recessive 1A (cirhin) [Source:HGNC Symbol;Acc:1983]
AML1.Control-6.smooth.chr16.cher32	Control	16	75136006	75136606	AML1.Control-6 smooth	1.50474	2.21719	ZNRF1	84937	ENSG00000186187	75032928	75144892	1	protein_coding	zinc and ring finger 1, E3 ubiquitin protein ligase [Source:HGNC Symbol;Acc:18452]
AML1.Control-6.smooth.chr16.cher35	Control	16	83933974	83934758	AML1.Control-6 smooth	1.76232	2.30787	MLYCD	23417	ENSG00000103150	83932731	83949787	1	protein_coding	malonyl-CoA decarboxylase [Source:HGNC Symbol;Acc:7150]
AML1.Control-6.smooth.chr16.cher36	Control	16	84729342	84729908	AML1.Control-6 smooth	1.19056	1.22274	USP10	9100	ENSG00000103194	84733584	84813528	1	protein_coding	ubiquitin specific peptidase 10 [Source:HGNC Symbol;Acc:12608]
AML1.Control-6.smooth.chr16.cher37	Control	16	84856048	84856546	AML1.Control-6 smooth	1.33669	1.56903	RP11-254F19.2	NA	ENSG00000260859	84861869	84862848	1	sense_intronic
AML1.Control-6.smooth.chr16.cher37	Control	16	84856048	84856546	AML1.Control-6 smooth	1.33669	1.56903	CRISPLD2	83716	ENSG00000103196	84853590	84954374	1	protein_coding	cysteine-rich secretory protein LCCL domain containing 2 [Source:HGNC Symbol;Acc:25248]
AML1.Control-6.smooth.chr16.cher39	Control	16	87797262	87797932	AML1.Control-6 smooth	1.2684	1.77805	KLHDC4	54758	ENSG00000104731	87730091	87799598	-1	protein_coding	kelch domain containing 4 [Source:HGNC Symbol;Acc:25272]
AML1.Control-6.smooth.chr17.cher1	Control	17	623610	624321	AML1.Control-6 smooth	1.04346	0.244666	VPS53	55275	ENSG00000141252	411908	624957	-1	protein_coding	vacuolar protein sorting 53 homolog (S. cerevisiae) [Source:HGNC Symbol;Acc:25608]
AML1.Control-6.smooth.chr17.cher2	Control	17	2236784	2237688	AML1.Control-6 smooth	1.43909	3.48505	TSR1	55720	ENSG00000167721	2225951	2240801	-1	protein_coding	TSR1, 20S rRNA accumulation, homolog (S. cerevisiae) [Source:HGNC Symbol;Acc:25542]
AML1.Control-6.smooth.chr17.cher2	Control	17	2236784	2237688	AML1.Control-6 smooth	1.43909	3.48505	SGSM2	9905	ENSG00000141258	2240792	2284352	1	protein_coding	small G protein signaling modulator 2 [Source:HGNC Symbol;Acc:29026]
AML1.Control-6.smooth.chr17.cher2	Control	17	2236784	2237688	AML1.Control-6 smooth	1.43909	3.48505	SNORD91B	692208	ENSG00000212552	2232413	2232507	-1	snoRNA	small nucleolar RNA, C/D box 91B [Source:HGNC Symbol;Acc:32753]
AML1.Control-6.smooth.chr17.cher2	Control	17	2236784	2237688	AML1.Control-6 smooth	1.43909	3.48505	SNORD91A	692207	ENSG00000212163	2233570	2233664	-1	snoRNA	small nucleolar RNA, C/D box 91A [Source:HGNC Symbol;Acc:32752]
AML1.Control-6.smooth.chr17.cher3	Control	17	2320785	2321454	AML1.Control-6 smooth	1.89158	5.9148	RP1-59D14.3	NA	ENSG00000205821	2308856	2319379	-1	processed_transcript
AML1.Control-6.smooth.chr17.cher3	Control	17	2320785	2321454	AML1.Control-6 smooth	1.89158	5.9148	METTL16	284009	ENSG00000127804	2319343	2415200	-1	protein_coding	methyltransferase like 16 [Source:HGNC Symbol;Acc:28484]
AML1.Control-6.smooth.chr17.cher4	Control	17	2414296	2414786	AML1.Control-6 smooth	1.10413	0.556351	METTL16	284009	ENSG00000127804	2319343	2415200	-1	protein_coding	methyltransferase like 16 [Source:HGNC Symbol;Acc:28484]
AML1.Control-6.smooth.chr17.cher5	Control	17	3714086	3714556	AML1.Control-6 smooth	1.24088	1.53458	CTD-3195I5.1	NA	ENSG00000262758	3710042	3712148	-1	lincRNA
AML1.Control-6.smooth.chr17.cher6	Control	17	4042588	4043084	AML1.Control-6 smooth	1.13703	0.664027	CYB5D2	124936	ENSG00000167740	4046462	4090605	1	protein_coding	cytochrome b5 domain containing 2 [Source:HGNC Symbol;Acc:28471]
AML1.Control-6.smooth.chr17.cher7	Control	17	4167598	4168180	AML1.Control-6 smooth	2.24543	4.44828	ANKFY1	51479	ENSG00000185722	4066665	4167274	-1	protein_coding	ankyrin repeat and FYVE domain containing 1 [Source:HGNC Symbol;Acc:20763]
AML1.Control-6.smooth.chr17.cher8	Control	17	4171538	4172932	AML1.Control-6 smooth	1.68923	6.62269	ANKFY1	51479	ENSG00000185722	4066665	4167274	-1	protein_coding	ankyrin repeat and FYVE domain containing 1 [Source:HGNC Symbol;Acc:20763]
AML1.Control-6.smooth.chr17.cher9	Control	17	4403590	4404056	AML1.Control-6 smooth	1.22856	1.34906	AC118754.4	NA	ENSG00000229782	4400689	4402969	-1	antisense
AML1.Control-6.smooth.chr17.cher9	Control	17	4403590	4404056	AML1.Control-6 smooth	1.22856	1.34906	SPNS2	124976	ENSG00000183018	4402133	4442330	1	protein_coding	spinster homolog 2 (Drosophila) [Source:HGNC Symbol;Acc:26992]
AML1.Control-6.smooth.chr17.cher10	Control	17	4671512	4672022	AML1.Control-6 smooth	1.60238	2.76517	TM4SF5	9032	ENSG00000142484	4675179	4686506	1	protein_coding	transmembrane 4 L six family member 5 [Source:HGNC Symbol;Acc:11857]
AML1.Control-6.smooth.chr17.cher11	Control	17	4700648	4701532	AML1.Control-6 smooth	1.55288	4.78186	PSMB6	5694	ENSG00000142507	4699439	4701790	1	protein_coding	proteasome (prosome, macropain) subunit, beta type, 6 [Source:HGNC Symbol;Acc:9543]
AML1.Control-6.smooth.chr17.cher12	Control	17	5340850	5341346	AML1.Control-6 smooth	1.10949	0.639536	CTC-524C5.2	NA	ENSG00000263272	5328459	5336196	-1	antisense
AML1.Control-6.smooth.chr17.cher12	Control	17	5340850	5341346	AML1.Control-6 smooth	1.10949	0.639536	C1QBP	708	ENSG00000108561	5336097	5352150	-1	protein_coding	complement component 1, q subcomponent binding protein [Source:HGNC Symbol;Acc:1243]
AML1.Control-6.smooth.chr17.cher13	Control	17	7334086	7334566	AML1.Control-6 smooth	1.71542	4.30384	TMEM102	284114	ENSG00000181284	7338762	7340998	1	protein_coding	transmembrane protein 102 [Source:HGNC Symbol;Acc:26722]
AML1.Control-6.smooth.chr17.cher14	Control	17	8531690	8532269	AML1.Control-6 smooth	1.39064	2.26975	MYH10	4628	ENSG00000133026	8377523	8534079	-1	protein_coding	myosin, heavy chain 10, non-muscle [Source:HGNC Symbol;Acc:7568]
AML1.Control-6.smooth.chr17.cher15	Control	17	17378634	17379128	AML1.Control-6 smooth	1.50422	3.03811	MED9	55090	ENSG00000141026	17380300	17396535	1	protein_coding	mediator complex subunit 9 [Source:HGNC Symbol;Acc:25487]
AML1.Control-6.smooth.chr17.cher16	Control	17	18853018	18853514	AML1.Control-6 smooth	1.06639	0.363629	SLC5A10	125206	ENSG00000154025	18853658	18925908	1	protein_coding	solute carrier family 5 (sodium/glucose cotransporter), member 10 [Source:HGNC Symbol;Acc:23155]
AML1.Control-6.smooth.chr17.cher17	Control	17	19440088	19440618	AML1.Control-6 smooth	1.17975	1.05155	SLC47A1	55244	ENSG00000142494	19436775	19482347	1	protein_coding	solute carrier family 47, member 1 [Source:HGNC Symbol;Acc:25588]
AML1.Control-6.smooth.chr17.cher18	Control	17	19545711	19546422	AML1.Control-6 smooth	1.38411	2.46729	ALDH3A2	224	ENSG00000072210	19551459	19580909	1	protein_coding	aldehyde dehydrogenase 3 family, member A2 [Source:HGNC Symbol;Acc:403]
AML1.Control-6.smooth.chr17.cher19	Control	17	20057358	20058644	AML1.Control-6 smooth	1.82527	8.08822	SPECC1	92521	ENSG00000128487	19912614	20222339	1	protein_coding	sperm antigen with calponin homology and coiled-coil domains 1 [Source:HGNC Symbol;Acc:30615]
AML1.Control-6.smooth.chr17.cher20	Control	17	21181528	21182118	AML1.Control-6 smooth	1.11461	0.895156	MAP2K3	100996792	ENSG00000034152	21187984	21218552	1	protein_coding	mitogen-activated protein kinase kinase 3 [Source:HGNC Symbol;Acc:6843]
AML1.Control-6.smooth.chr17.cher21	Control	17	25795894	25796870	AML1.Control-6 smooth	1.3456	2.96964	KSR1	8844	ENSG00000141068	25783670	25953461	1	protein_coding	kinase suppressor of ras 1 [Source:HGNC Symbol;Acc:6465]
AML1.Control-6.smooth.chr17.cher22	Control	17	26663898	26664402	AML1.Control-6 smooth	1.09689	0.633942	IFT20	90410	ENSG00000109083	26655353	26662495	-1	protein_coding	intraflagellar transport 20 homolog (Chlamydomonas) [Source:HGNC Symbol;Acc:30989]
AML1.Control-6.smooth.chr17.cher22	Control	17	26663898	26664402	AML1.Control-6 smooth	1.09689	0.633942	TNFAIP1	7126	ENSG00000109079	26662730	26674035	1	protein_coding	tumor necrosis factor, alpha-induced protein 1 (endothelial) [Source:HGNC Symbol;Acc:11894]
AML1.Control-6.smooth.chr17.cher23	Control	17	26739048	26739628	AML1.Control-6 smooth	1.4611	1.96978	SLC46A1	113235	ENSG00000076351	26721661	26733228	-1	protein_coding	solute carrier family 46 (folate transporter), member 1 [Source:HGNC Symbol;Acc:30521]
AML1.Control-6.smooth.chr17.cher24	Control	17	26898834	26899330	AML1.Control-6 smooth	1.06958	0.527938	PIGS	94005	ENSG00000087111	26880405	26898546	-1	protein_coding	phosphatidylinositol glycan anchor biosynthesis, class S [Source:HGNC Symbol;Acc:14937]
AML1.Control-6.smooth.chr17.cher25	Control	17	27363052	27363852	AML1.Control-6 smooth	1.5585	3.7929	PIPOX	51268	ENSG00000179761	27369918	27384234	1	protein_coding	pipecolic acid oxidase [Source:HGNC Symbol;Acc:17804]
AML1.Control-6.smooth.chr17.cher26	Control	17	28560530	28561130	AML1.Control-6 smooth	1.183	1.32684	SLC6A4	6532	ENSG00000108576	28521337	28562954	-1	protein_coding	solute carrier family 6 (neurotransmitter transporter, serotonin), member 4 [Source:HGNC Symbol;Acc:11050]
AML1.Control-6.smooth.chr17.cher27	Control	17	32904322	32904838	AML1.Control-6 smooth	1.21173	1.11743	TMEM132E	124842	ENSG00000181291	32907942	32966337	1	protein_coding	transmembrane protein 132E [Source:HGNC Symbol;Acc:26991]
AML1.Control-6.smooth.chr17.cher27	Control	17	32904322	32904838	AML1.Control-6 smooth	1.21173	1.11743	C17orf102	400591	ENSG00000197322	32901142	32906388	-1	protein_coding	chromosome 17 open reading frame 102 [Source:HGNC Symbol;Acc:34412]
AML1.Control-6.smooth.chr17.cher28	Control	17	33443890	33444460	AML1.Control-6 smooth	1.25767	1.72305	FNDC8	54752	ENSG00000073598	33448650	33457751	1	protein_coding	fibronectin type III domain containing 8 [Source:HGNC Symbol;Acc:25286]
AML1.Control-6.smooth.chr17.cher28	Control	17	33443890	33444460	AML1.Control-6 smooth	1.25767	1.72305	RAD51D	5892	ENSG00000185379	33426811	33448541	-1	protein_coding	RAD51 homolog D (S. cerevisiae) [Source:HGNC Symbol;Acc:9823]
AML1.Control-6.smooth.chr17.cher29	Control	17	34394000	34394574	AML1.Control-6 smooth	1.36945	2.27076	CCL18	6362	ENSG00000006074	34391640	34399392	1	protein_coding	chemokine (C-C motif) ligand 18 (pulmonary and activation-regulated) [Source:HGNC Symbol;Acc:10616]
AML1.Control-6.smooth.chr17.cher30	Control	17	35718308	35719002	AML1.Control-6 smooth	1.32078	1.94529	ACACA	31	ENSG00000132142	35441923	35766902	-1	protein_coding	acetyl-CoA carboxylase alpha [Source:HGNC Symbol;Acc:84]
AML1.Control-6.smooth.chr17.cher31	Control	17	38214278	38214858	AML1.Control-6 smooth	1.45029	2.06603	MED24	102466757	ENSG00000008838	38175350	38210661	-1	protein_coding	mediator complex subunit 24 [Source:HGNC Symbol;Acc:22963]
AML1.Control-6.smooth.chr17.cher31	Control	17	38214278	38214858	AML1.Control-6 smooth	1.45029	2.06603	THRA	7067	ENSG00000126351	38218446	38250120	1	protein_coding	thyroid hormone receptor, alpha [Source:HGNC Symbol;Acc:11796]
AML1.Control-6.smooth.chr17.cher32	Control	17	39538494	39539184	AML1.Control-6 smooth	1.2156	0.998643	KRT34	100653049	ENSG00000131737	39533902	39538655	-1	protein_coding	keratin 34 [Source:HGNC Symbol;Acc:6452]
AML1.Control-6.smooth.chr17.cher33	Control	17	39801821	39802310	AML1.Control-6 smooth	1.3736	1.47366	KRT42P	284116	ENSG00000214514	39782579	39796451	-1	pseudogene	keratin 42 pseudogene [Source:HGNC Symbol;Acc:27581]
AML1.Control-6.smooth.chr17.cher34	Control	17	40307664	40308174	AML1.Control-6 smooth	1.17628	0.759999	RAB5C	5878	ENSG00000108774	40276994	40307035	-1	protein_coding	RAB5C, member RAS oncogene family [Source:HGNC Symbol;Acc:9785]
AML1.Control-6.smooth.chr17.cher35	Control	17	41052680	41053366	AML1.Control-6 smooth	1.22215	1.59686	AC100793.2	388387	ENSG00000213373	41026687	41050751	-1	lincRNA
AML1.Control-6.smooth.chr17.cher35	Control	17	41052680	41053366	AML1.Control-6 smooth	1.22215	1.59686	G6PC	2538	ENSG00000131482	41052815	41065386	1	protein_coding	glucose-6-phosphatase, catalytic subunit [Source:HGNC Symbol;Acc:4056]
AML1.Control-6.smooth.chr17.cher36	Control	17	41629502	41630138	AML1.Control-6 smooth	1.91423	5.63605	ETV4	2118	ENSG00000175832	41605212	41623762	-1	protein_coding	ets variant 4 [Source:HGNC Symbol;Acc:3493]
AML1.Control-6.smooth.chr17.cher37	Control	17	42786008	42786726	AML1.Control-6 smooth	1.63508	2.89756	DBF4B	80174	ENSG00000161692	42785976	42829632	1	protein_coding	DBF4 homolog B (S. cerevisiae) [Source:HGNC Symbol;Acc:17883]
AML1.Control-6.smooth.chr17.cher39	Control	17	42924932	42925928	AML1.Control-6 smooth	1.43396	3.69064	HIGD1B	51751	ENSG00000131097	42925279	42927840	1	protein_coding	HIG1 hypoxia inducible domain family, member 1B [Source:HGNC Symbol;Acc:24318]
AML1.Control-6.smooth.chr17.cher40	Control	17	43398926	43399640	AML1.Control-6 smooth	1.23196	1.60829	MAP3K14	NA	ENSG00000006062	43340488	43394414	-1	protein_coding	mitogen-activated protein kinase kinase kinase 14 [Source:HGNC Symbol;Acc:6853]
AML1.Control-6.smooth.chr17.cher42	Control	17	45930288	45931476	AML1.Control-6 smooth	1.22402	2.15038	SP6	80320	ENSG00000189120	45922280	45933240	-1	protein_coding	Sp6 transcription factor [Source:HGNC Symbol;Acc:14530]
AML1.Control-6.smooth.chr17.cher43	Control	17	46709750	46710192	AML1.Control-6 smooth	1.06682	0.386624	MIR196A1	NA	ENSG00000258217	46709837	46709938	-1	non_coding
AML1.Control-6.smooth.chr17.cher43	Control	17	46709750	46710192	AML1.Control-6 smooth	1.06682	0.386624	HOXB9	3219	ENSG00000170689	46698518	46703839	-1	protein_coding	homeobox B9 [Source:HGNC Symbol;Acc:5120]
AML1.Control-6.smooth.chr17.cher43	Control	17	46709750	46710192	AML1.Control-6 smooth	1.06682	0.386624	MIR196A1	406972	ENSG00000210741	46709852	46709921	-1	miRNA	microRNA 196a-1 [Source:HGNC Symbol;Acc:31567]
AML1.Control-6.smooth.chr17.cher43	Control	17	46709750	46710192	AML1.Control-6 smooth	1.06682	0.386624	HOXB-AS4	NA	ENSG00000242207	46706037	46712294	1	antisense	HOXB cluster antisense RNA 4 (non-protein coding) [Source:HGNC Symbol;Acc:40285]
AML1.Control-6.smooth.chr17.cher43	Control	17	46709750	46710192	AML1.Control-6 smooth	1.06682	0.386624	HOXB7	NA	ENSG00000120087	46684594	46710934	-1	protein_coding	homeobox B7 [Source:HGNC Symbol;Acc:5118]
AML1.Control-6.smooth.chr17.cher44	Control	17	47489356	47489970	AML1.Control-6 smooth	1.60837	2.60849	PHB	5245	ENSG00000167085	47481414	47492246	-1	protein_coding	prohibitin [Source:HGNC Symbol;Acc:8912]
AML1.Control-6.smooth.chr17.cher45	Control	17	53029132	53029620	AML1.Control-6 smooth	1.08514	0.16053	COX11	1353	ENSG00000166260	53029263	53046146	-1	protein_coding	COX11 cytochrome c oxidase assembly homolog (yeast) [Source:HGNC Symbol;Acc:2261]
AML1.Control-6.smooth.chr17.cher46	Control	17	54230884	54231363	AML1.Control-6 smooth	1.27356	1.57631	ANKFN1	101927443	ENSG00000153930	54188319	54589020	1	protein_coding	ankyrin-repeat and fibronectin type III domain containing 1 [Source:HGNC Symbol;Acc:26766]
AML1.Control-6.smooth.chr17.cher47	Control	17	54667830	54668626	AML1.Control-6 smooth	1.20741	1.44034	NOG	9241	ENSG00000183691	54671060	54672951	1	protein_coding	noggin [Source:HGNC Symbol;Acc:7866]
AML1.Control-6.smooth.chr17.cher48	Control	17	56571723	56572518	AML1.Control-6 smooth	1.65422	4.90377	HSF5	124535	ENSG00000176160	56497529	56565759	-1	protein_coding	heat shock transcription factor family member 5 [Source:HGNC Symbol;Acc:26862]
AML1.Control-6.smooth.chr17.cher49	Control	17	57785536	57786018	AML1.Control-6 smooth	1.25933	1.49732	PTRH2	51651	ENSG00000141378	57774667	57784987	-1	protein_coding	peptidyl-tRNA hydrolase 2 [Source:HGNC Symbol;Acc:24265]
AML1.Control-6.smooth.chr17.cher49	Control	17	57785536	57786018	AML1.Control-6 smooth	1.25933	1.49732	VMP1	406991	ENSG00000062716	57784863	57917950	1	protein_coding	vacuole membrane protein 1 [Source:HGNC Symbol;Acc:29559]
AML1.Control-6.smooth.chr17.cher51	Control	17	64294964	64295656	AML1.Control-6 smooth	1.34167	2.54249	PRKCA	5578	ENSG00000154229	64298944	64801114	1	protein_coding	protein kinase C, alpha [Source:HGNC Symbol;Acc:9393]
AML1.Control-6.smooth.chr17.cher52	Control	17	64870848	64871448	AML1.Control-6 smooth	1.3607	2.50022	CACNG5	27091	ENSG00000075429	64831235	64881603	1	protein_coding	calcium channel, voltage-dependent, gamma subunit 5 [Source:HGNC Symbol;Acc:1409]
AML1.Control-6.smooth.chr17.cher53	Control	17	66424736	66425242	AML1.Control-6 smooth	1.12802	0.513098	MIR635	693220	ENSG00000207561	66420592	66420689	-1	miRNA	microRNA 635 [Source:HGNC Symbol;Acc:32891]
AML1.Control-6.smooth.chr17.cher54	Control	17	68065451	68065948	AML1.Control-6 smooth	1.24585	1.37047	KCNJ16	3773	ENSG00000153822	68071426	68131744	1	protein_coding	potassium inwardly-rectifying channel, subfamily J, member 16 [Source:HGNC Symbol;Acc:6262]
AML1.Control-6.smooth.chr17.cher55	Control	17	72593006	72593500	AML1.Control-6 smooth	1.15766	0.793695	CTD-2006K23.1	101928343	ENSG00000261222	72599876	72603368	1	antisense
AML1.Control-6.smooth.chr17.cher55	Control	17	72593006	72593500	AML1.Control-6 smooth	1.15766	0.793695	CD300LD	100131439	ENSG00000204345	72575504	72588422	-1	protein_coding	CD300 molecule-like family member d [Source:HGNC Symbol;Acc:16848]
AML1.Control-6.smooth.chr17.cher56	Control	17	72871854	72872465	AML1.Control-6 smooth	1.23538	1.7088	FDXR	2232	ENSG00000161513	72858620	72869156	-1	protein_coding	ferredoxin reductase [Source:HGNC Symbol;Acc:3642]
AML1.Control-6.smooth.chr17.cher57	Control	17	74056950	74057458	AML1.Control-6 smooth	1.2508	1.22182	SRP68	6730	ENSG00000167881	74035187	74068607	-1	protein_coding	signal recognition particle 68kDa [Source:HGNC Symbol;Acc:11302]
AML1.Control-6.smooth.chr17.cher58	Control	17	76041040	76041536	AML1.Control-6 smooth	1.02128	0.219044	TNRC6C	57690	ENSG00000078687	76001137	76104916	1	protein_coding	trinucleotide repeat containing 6C [Source:HGNC Symbol;Acc:29318]
AML1.Control-6.smooth.chr17.cher59	Control	17	76045540	76046044	AML1.Control-6 smooth	1.15438	0.976421	TNRC6C	57690	ENSG00000078687	76001137	76104916	1	protein_coding	trinucleotide repeat containing 6C [Source:HGNC Symbol;Acc:29318]
AML1.Control-6.smooth.chr17.cher60	Control	17	78356606	78357618	AML1.Control-6 smooth	1.34585	2.83835	RNF213	57674	ENSG00000173821	78234665	78370078	1	protein_coding	ring finger protein 213 [Source:HGNC Symbol;Acc:14539]
AML1.Control-6.smooth.chr18.cher1	Control	18	574602	575212	AML1.Control-6 smooth	1.40861	2.24598	CETN1	1068	ENSG00000177143	580367	581524	1	protein_coding	centrin, EF-hand protein, 1 [Source:HGNC Symbol;Acc:1866]
AML1.Control-6.smooth.chr18.cher2	Control	18	577810	578496	AML1.Control-6 smooth	1.48674	2.91427	CETN1	1068	ENSG00000177143	580367	581524	1	protein_coding	centrin, EF-hand protein, 1 [Source:HGNC Symbol;Acc:1866]
AML1.Control-6.smooth.chr18.cher3	Control	18	612060	612528	AML1.Control-6 smooth	1.01732	0.0762181	CLUL1	27098	ENSG00000079101	596998	650334	1	protein_coding	clusterin-like 1 (retinal) [Source:HGNC Symbol;Acc:2096]
AML1.Control-6.smooth.chr18.cher4	Control	18	814183	815050	AML1.Control-6 smooth	1.48753	2.59116	YES1	7525	ENSG00000176105	721592	812327	-1	protein_coding	v-yes-1 Yamaguchi sarcoma viral oncogene homolog 1 [Source:HGNC Symbol;Acc:12841]
AML1.Control-6.smooth.chr18.cher5	Control	18	5633996	5634578	AML1.Control-6 smooth	1.17521	1.31265	EPB41L3	23136	ENSG00000082397	5392383	5630640	-1	protein_coding	erythrocyte membrane protein band 4.1-like 3 [Source:HGNC Symbol;Acc:3380]
AML1.Control-6.smooth.chr18.cher6	Control	18	7754234	7755026	AML1.Control-6 smooth	1.32246	1.16318	PTPRM	5797	ENSG00000173482	7567817	8406859	1	protein_coding	protein tyrosine phosphatase, receptor type, M [Source:HGNC Symbol;Acc:9675]
AML1.Control-6.smooth.chr18.cher7	Control	18	7757096	7757822	AML1.Control-6 smooth	1.32621	1.70959	PTPRM	5797	ENSG00000173482	7567817	8406859	1	protein_coding	protein tyrosine phosphatase, receptor type, M [Source:HGNC Symbol;Acc:9675]
AML1.Control-6.smooth.chr18.cher8	Control	18	8611582	8612280	AML1.Control-6 smooth	1.96375	5.9725	RAB12	201475	ENSG00000206418	8609443	8639380	1	protein_coding	RAB12, member RAS oncogene family [Source:HGNC Symbol;Acc:31332]
AML1.Control-6.smooth.chr18.cher9	Control	18	9912910	9913538	AML1.Control-6 smooth	1.68994	3.77573	VAPA	9218	ENSG00000101558	9913999	9960018	1	protein_coding	VAMP (vesicle-associated membrane protein)-associated protein A, 33kDa [Source:HGNC Symbol;Acc:12648]
AML1.Control-6.smooth.chr18.cher10	Control	18	10524882	10525566	AML1.Control-6 smooth	1.28866	2.22748	NAPG	8774	ENSG00000134265	10525873	10552762	1	protein_coding	N-ethylmaleimide-sensitive factor attachment protein, gamma [Source:HGNC Symbol;Acc:7642]
AML1.Control-6.smooth.chr18.cher11	Control	18	12248726	12249198	AML1.Control-6 smooth	1.27287	1.44171	CIDEA	1149	ENSG00000176194	12254318	12277594	1	protein_coding	cell death-inducing DFFA-like effector a [Source:HGNC Symbol;Acc:1976]
AML1.Control-6.smooth.chr18.cher12	Control	18	13004550	13005440	AML1.Control-6 smooth	1.25837	2.36837	CEP192	55125	ENSG00000101639	12991361	13125051	1	protein_coding	centrosomal protein 192kDa [Source:HGNC Symbol;Acc:25515]
AML1.Control-6.smooth.chr18.cher15	Control	18	13885070	13885751	AML1.Control-6 smooth	1.78179	5.63791	MC2R	4158	ENSG00000185231	13882043	13915535	-1	protein_coding	melanocortin 2 receptor (adrenocorticotropic hormone) [Source:HGNC Symbol;Acc:6930]
AML1.Control-6.smooth.chr18.cher16	Control	18	22003240	22003750	AML1.Control-6 smooth	1.01947	0.231051	IMPACT	55364	ENSG00000154059	22006580	22033499	1	protein_coding	Impact homolog (mouse) [Source:HGNC Symbol;Acc:20387]
AML1.Control-6.smooth.chr18.cher16	Control	18	22003240	22003750	AML1.Control-6 smooth	1.01947	0.231051	Y_RNA	NA	ENSG00000199636	22009469	22009573	1	misc_RNA	Y RNA [Source:RFAM;Acc:RF00019]
AML1.Control-6.smooth.chr18.cher18	Control	18	25754695	25755172	AML1.Control-6 smooth	1.33283	1.77825	CDH2	1000	ENSG00000170558	25530930	25757410	-1	protein_coding	cadherin 2, type 1, N-cadherin (neuronal) [Source:HGNC Symbol;Acc:1759]
AML1.Control-6.smooth.chr18.cher19	Control	18	29674266	29675085	AML1.Control-6 smooth	1.44048	3.47716	RNF138	51444	ENSG00000134758	29671828	29711524	1	protein_coding	ring finger protein 138, E3 ubiquitin protein ligase [Source:HGNC Symbol;Acc:17765]
AML1.Control-6.smooth.chr18.cher21	Control	18	43298591	43299216	AML1.Control-6 smooth	1.3493	1.81193	SLC14A1	6563	ENSG00000141469	43304092	43332485	1	protein_coding	solute carrier family 14 (urea transporter), member 1 (Kidd blood group) [Source:HGNC Symbol;Acc:10918]
AML1.Control-6.smooth.chr18.cher22	Control	18	43446438	43446948	AML1.Control-6 smooth	1.67658	3.74662	EPG5	57724	ENSG00000152223	43427574	43547240	-1	protein_coding	ectopic P-granules autophagy protein 5 homolog (C. elegans) [Source:HGNC Symbol;Acc:29331]
AML1.Control-6.smooth.chr18.cher23	Control	18	43502362	43502865	AML1.Control-6 smooth	1.41394	2.26911	EPG5	57724	ENSG00000152223	43427574	43547240	-1	protein_coding	ectopic P-granules autophagy protein 5 homolog (C. elegans) [Source:HGNC Symbol;Acc:29331]
AML1.Control-6.smooth.chr18.cher25	Control	18	45667846	45668356	AML1.Control-6 smooth	1.22163	1.04551	ZBTB7C	201501	ENSG00000184828	45553640	45935663	-1	protein_coding	zinc finger and BTB domain containing 7C [Source:HGNC Symbol;Acc:31700]
AML1.Control-6.smooth.chr18.cher26	Control	18	56532100	56533186	AML1.Control-6 smooth	1.7466	6.06072	ZNF532	55205	ENSG00000074657	56529832	56653712	1	protein_coding	zinc finger protein 532 [Source:HGNC Symbol;Acc:30940]
AML1.Control-6.smooth.chr18.cher28	Control	18	60380383	60380995	AML1.Control-6 smooth	1.37562	0.819229	PHLPP1	23239	ENSG00000081913	60382672	60647666	1	protein_coding	PH domain and leucine rich repeat protein phosphatase 1 [Source:HGNC Symbol;Acc:20610]
AML1.Control-6.smooth.chr18.cher29	Control	18	61145216	61145850	AML1.Control-6 smooth	1.13063	0.688251	SERPINB5	5268	ENSG00000206075	61143994	61172318	1	protein_coding	serpin peptidase inhibitor, clade B (ovalbumin), member 5 [Source:HGNC Symbol;Acc:8949]
AML1.Control-6.smooth.chr18.cher30	Control	18	61256761	61257527	AML1.Control-6 smooth	1.30702	1.67233	SERPINB13	5275	ENSG00000197641	61254223	61271873	1	protein_coding	serpin peptidase inhibitor, clade B (ovalbumin), member 13 [Source:HGNC Symbol;Acc:8944]
AML1.Control-6.smooth.chr18.cher31	Control	18	61535354	61535867	AML1.Control-6 smooth	1.2887	1.14757	SERPINB2	5055	ENSG00000197632	61538926	61571124	1	protein_coding	serpin peptidase inhibitor, clade B (ovalbumin), member 2 [Source:HGNC Symbol;Acc:8584]
AML1.Control-6.smooth.chr18.cher32	Control	18	61652472	61652956	AML1.Control-6 smooth	1.09847	0.661828	SERPINB8	5271	ENSG00000166401	61637159	61672278	1	protein_coding	serpin peptidase inhibitor, clade B (ovalbumin), member 8 [Source:HGNC Symbol;Acc:8952]
AML1.Control-6.smooth.chr18.cher34	Control	18	66461826	66462410	AML1.Control-6 smooth	1.09124	0.7287	CCDC102B	79839	ENSG00000150636	66401969	66722426	1	protein_coding	coiled-coil domain containing 102B [Source:HGNC Symbol;Acc:26295]
AML1.Control-6.smooth.chr18.cher36	Control	18	67874096	67874697	AML1.Control-6 smooth	1.49699	2.92171	RTTN	25914	ENSG00000176225	67671045	67872962	-1	protein_coding	rotatin [Source:HGNC Symbol;Acc:18654]
AML1.Control-6.smooth.chr18.cher38	Control	18	74724858	74725530	AML1.Control-6 smooth	1.33974	2.61264	MBP	4155	ENSG00000197971	74690783	74845639	-1	protein_coding	myelin basic protein [Source:HGNC Symbol;Acc:6925]
AML1.Control-6.smooth.chr19.cher1	Control	19	1524562	1525142	AML1.Control-6 smooth	1.18252	1.11972	PLK5	126520	ENSG00000185988	1524138	1535455	1	pseudogene	polo-like kinase 5 [Source:HGNC Symbol;Acc:27001]
AML1.Control-6.smooth.chr19.cher2	Control	19	4873826	4874308	AML1.Control-6 smooth	1.98337	5.8728	PLIN3	10226	ENSG00000105355	4838346	4867780	-1	protein_coding	perilipin 3 [Source:HGNC Symbol;Acc:16893]
AML1.Control-6.smooth.chr19.cher3	Control	19	5626122	5626820	AML1.Control-6 smooth	1.17343	0.728255	SAFB2	9667	ENSG00000130254	5587011	5622938	-1	protein_coding	scaffold attachment factor B2 [Source:HGNC Symbol;Acc:21605]
AML1.Control-6.smooth.chr19.cher3	Control	19	5626122	5626820	AML1.Control-6 smooth	1.17343	0.728255	SAFB	6294	ENSG00000160633	5623150	5668488	1	protein_coding	scaffold attachment factor B [Source:HGNC Symbol;Acc:10520]
AML1.Control-6.smooth.chr19.cher4	Control	19	8842146	8842636	AML1.Control-6 smooth	1.08217	0.587167	CTD-2557P19.1	NA	ENSG00000241812	8839097	8839566	-1	pseudogene
AML1.Control-6.smooth.chr19.cher5	Control	19	10051324	10051934	AML1.Control-6 smooth	1.34572	1.4261	OLFM2	93145	ENSG00000105088	9964395	10047070	-1	protein_coding	olfactomedin 2 [Source:HGNC Symbol;Acc:17189]
AML1.Control-6.smooth.chr19.cher6	Control	19	12724438	12725025	AML1.Control-6 smooth	1.78364	4.74439	ZNF490	57474	ENSG00000188033	12688775	12750912	-1	protein_coding	zinc finger protein 490 [Source:HGNC Symbol;Acc:23705]
AML1.Control-6.smooth.chr19.cher6	Control	19	12724438	12725025	AML1.Control-6 smooth	1.78364	4.74439	ZNF791	163049	ENSG00000173875	12721732	12742735	1	protein_coding	zinc finger protein 791 [Source:HGNC Symbol;Acc:26895]
AML1.Control-6.smooth.chr19.cher7	Control	19	12861236	12862062	AML1.Control-6 smooth	1.34465	1.97654	BEST2	54831	ENSG00000039987	12862516	12869272	1	protein_coding	bestrophin 2 [Source:HGNC Symbol;Acc:17107]
AML1.Control-6.smooth.chr19.cher8	Control	19	12884386	12884870	AML1.Control-6 smooth	1.26463	1.51149	HOOK2	29911	ENSG00000095066	12873817	12886434	-1	protein_coding	hook homolog 2 (Drosophila) [Source:HGNC Symbol;Acc:19885]
AML1.Control-6.smooth.chr19.cher9	Control	19	16611554	16612256	AML1.Control-6 smooth	1.15325	0.982299	CALR3	NA	ENSG00000141979	16589875	16739015	-1	protein_coding	calreticulin 3 [Source:HGNC Symbol;Acc:20407]
AML1.Control-6.smooth.chr19.cher11	Control	19	33163984	33164606	AML1.Control-6 smooth	1.09232	0.674361	RGS9BP	388531	ENSG00000186326	33166313	33169206	1	protein_coding	regulator of G protein signaling 9 binding protein [Source:HGNC Symbol;Acc:30304]
AML1.Control-6.smooth.chr19.cher11	Control	19	33163984	33164606	AML1.Control-6 smooth	1.09232	0.674361	ANKRD27	84079	ENSG00000105186	33087907	33166102	-1	protein_coding	ankyrin repeat domain 27 (VPS9 domain) [Source:HGNC Symbol;Acc:25310]
AML1.Control-6.smooth.chr19.cher12	Control	19	36979387	36979862	AML1.Control-6 smooth	1.56792	2.05059	ZNF566	84924	ENSG00000186017	36936021	36980804	-1	protein_coding	zinc finger protein 566 [Source:HGNC Symbol;Acc:25919]
AML1.Control-6.smooth.chr19.cher13	Control	19	37960868	37961390	AML1.Control-6 smooth	1.11218	0.555942	AC008806.2	NA	ENSG00000240185	37957641	37960165	-1	processed_transcript
AML1.Control-6.smooth.chr19.cher13	Control	19	37960868	37961390	AML1.Control-6 smooth	1.11218	0.555942	ZNF569	148266	ENSG00000196437	37902062	37958339	-1	protein_coding	zinc finger protein 569 [Source:HGNC Symbol;Acc:24737]
AML1.Control-6.smooth.chr19.cher13	Control	19	37960868	37961390	AML1.Control-6 smooth	1.11218	0.555942	ZNF570	148268	ENSG00000171827	37959982	37976260	1	protein_coding	zinc finger protein 570 [Source:HGNC Symbol;Acc:26416]
AML1.Control-6.smooth.chr19.cher14	Control	19	38145141	38145738	AML1.Control-6 smooth	1.32498	2.17087	ZFP30	22835	ENSG00000120784	38123389	38147162	-1	protein_coding	zinc finger protein 30 homolog (mouse) [Source:HGNC Symbol;Acc:29555]
AML1.Control-6.smooth.chr19.cher15	Control	19	38884412	38885004	AML1.Control-6 smooth	1.1832	0.764509	GGN	199720	ENSG00000179168	38874995	38878668	-1	protein_coding	gametogenetin [Source:HGNC Symbol;Acc:18869]
AML1.Control-6.smooth.chr19.cher16	Control	19	39923828	39924808	AML1.Control-6 smooth	1.3579	2.71316	AC011500.1	NA	ENSG00000213922	39930212	39932082	1	protein_coding	Interleukin-like; Uncharacterized protein [Source:UniProtKB/TrEMBL;Acc:Q1AN28]
AML1.Control-6.smooth.chr19.cher16	Control	19	39923828	39924808	AML1.Control-6 smooth	1.3579	2.71316	RPS16	6217	ENSG00000105193	39923852	39926618	-1	protein_coding	ribosomal protein S16 [Source:HGNC Symbol;Acc:10396]
AML1.Control-6.smooth.chr19.cher17	Control	19	40086314	40086924	AML1.Control-6 smooth	1.07667	0.593037	AC005205.4	NA	ENSG00000239320	40088472	40088642	1	pseudogene
AML1.Control-6.smooth.chr19.cher17	Control	19	40086314	40086924	AML1.Control-6 smooth	1.07667	0.593037	LGALS13	29124	ENSG00000105198	40093164	40098113	1	protein_coding	lectin, galactoside-binding, soluble, 13 [Source:HGNC Symbol;Acc:15449]
AML1.Control-6.smooth.chr19.cher18	Control	19	40731332	40731812	AML1.Control-6 smooth	1.12774	0.47487	CNTD2	79935	ENSG00000105219	40728115	40732597	-1	protein_coding	cyclin N-terminal domain containing 2 [Source:HGNC Symbol;Acc:25805]
AML1.Control-6.smooth.chr19.cher19	Control	19	42581086	42581709	AML1.Control-6 smooth	1.08584	0.598966	ZNF574	64763	ENSG00000105732	42572864	42585717	1	protein_coding	zinc finger protein 574 [Source:HGNC Symbol;Acc:26166]
AML1.Control-6.smooth.chr19.cher20	Control	19	42826000	42826810	AML1.Control-6 smooth	1.10413	0.629737	MEGF8	1954	ENSG00000105429	42829761	42882921	1	protein_coding	multiple EGF-like-domains 8 [Source:HGNC Symbol;Acc:3233]
AML1.Control-6.smooth.chr19.cher21	Control	19	46479014	46479484	AML1.Control-6 smooth	1.95209	4.47272	NOVA2	4858	ENSG00000104967	46437010	46476804	-1	protein_coding	neuro-oncological ventral antigen 2 [Source:HGNC Symbol;Acc:7887]
AML1.Control-6.smooth.chr19.cher22	Control	19	48900646	48901380	AML1.Control-6 smooth	1.48972	3.7971	KDELR1	10945	ENSG00000105438	48885827	48894810	-1	protein_coding	KDEL (Lys-Asp-Glu-Leu) endoplasmic reticulum protein retention receptor 1 [Source:HGNC Symbol;Acc:6304]
AML1.Control-6.smooth.chr19.cher22	Control	19	48900646	48901380	AML1.Control-6 smooth	1.48972	3.7971	GRIN2D	2906	ENSG00000105464	48898132	48948187	1	protein_coding	glutamate receptor, ionotropic, N-methyl D-aspartate 2D [Source:HGNC Symbol;Acc:4588]
AML1.Control-6.smooth.chr19.cher23	Control	19	49951604	49952094	AML1.Control-6 smooth	2.05504	4.97626	SLC17A7	57030	ENSG00000104888	49932656	49945617	-1	protein_coding	solute carrier family 17 (sodium-dependent inorganic phosphate cotransporter), member 7 [Source:HGNC Symbol;Acc:16704]
AML1.Control-6.smooth.chr19.cher23	Control	19	49951604	49952094	AML1.Control-6 smooth	2.05504	4.97626	ALDH16A1	126133	ENSG00000161618	49956473	49974304	1	protein_coding	aldehyde dehydrogenase 16 family, member A1 [Source:HGNC Symbol;Acc:28114]
AML1.Control-6.smooth.chr19.cher24	Control	19	51294226	51294822	AML1.Control-6 smooth	1.67376	3.83445	CTD-2568A17.1	NA	ENSG00000261341	51279398	51289467	-1	lincRNA
AML1.Control-6.smooth.chr19.cher24	Control	19	51294226	51294822	AML1.Control-6 smooth	1.67376	3.83445	ACPT	93650	ENSG00000142513	51293672	51298481	1	protein_coding	acid phosphatase, testicular [Source:HGNC Symbol;Acc:14376]
AML1.Control-6.smooth.chr19.cher25	Control	19	51317880	51318694	AML1.Control-6 smooth	1.90604	6.87095	AC010325.1	284365	ENSG00000180279	51320937	51322131	1	protein_coding	HCG2008078; MGC45922 protein; Uncharacterized protein [Source:UniProtKB/TrEMBL;Acc:Q8N4W5]
AML1.Control-6.smooth.chr19.cher26	Control	19	53762770	53763375	AML1.Control-6 smooth	1.14286	0.94004	ZNF677	342926	ENSG00000197928	53727087	53758126	-1	protein_coding	zinc finger protein 677 [Source:HGNC Symbol;Acc:28730]
AML1.Control-6.smooth.chr19.cher27	Control	19	54276066	54276854	AML1.Control-6 smooth	1.91563	5.47378	HMGN1P32	NA	ENSG00000237589	54271225	54271807	-1	pseudogene	high mobility group nucleosome binding domain 1 pseudogene 32 [Source:HGNC Symbol;Acc:39376]
AML1.Control-6.smooth.chr19.cher27	Control	19	54276066	54276854	AML1.Control-6 smooth	1.91563	5.47378	AC008753.3	NA	ENSG00000238150	54278853	54279136	1	pseudogene
AML1.Control-6.smooth.chr19.cher27	Control	19	54276066	54276854	AML1.Control-6 smooth	1.91563	5.47378	U6	NA	ENSG00000252979	54269788	54269886	-1	snRNA	U6 spliceosomal RNA [Source:RFAM;Acc:RF00026]
AML1.Control-6.smooth.chr19.cher27	Control	19	54276066	54276854	AML1.Control-6 smooth	1.91563	5.47378	SEPT7P8	NA	ENSG00000229000	54275760	54276534	-1	pseudogene	septin 7 pseudogene 8 [Source:HGNC Symbol;Acc:38044]
AML1.Control-6.smooth.chr19.cher28	Control	19	54644622	54645098	AML1.Control-6 smooth	1.13616	0.664452	CNOT3	4849	ENSG00000088038	54641444	54659419	1	protein_coding	CCR4-NOT transcription complex, subunit 3 [Source:HGNC Symbol;Acc:7879]
AML1.Control-6.smooth.chr19.cher29	Control	19	55159405	55160000	AML1.Control-6 smooth	1.311	1.48414	AC009892.9	NA	ENSG00000237323	55163535	55163680	1	pseudogene
AML1.Control-6.smooth.chr19.cher29	Control	19	55159405	55160000	AML1.Control-6 smooth	1.311	1.48414	VN1R105P	NA	ENSG00000242856	55159393	55160302	1	pseudogene	vomeronasal 1 receptor 105 pseudogene [Source:HGNC Symbol;Acc:37428]
AML1.Control-6.smooth.chr19.cher30	Control	19	55774352	55774883	AML1.Control-6 smooth	1.18882	1.10391	PPP6R1	22870	ENSG00000105063	55741148	55770363	-1	protein_coding	protein phosphatase 6, regulatory subunit 1 [Source:HGNC Symbol;Acc:29195]
AML1.Control-6.smooth.chr19.cher31	Control	19	55893736	55894436	AML1.Control-6 smooth	1.41664	2.40668	RPL28	102465483	ENSG00000108107	55896713	55914612	1	protein_coding	ribosomal protein L28 [Source:HGNC Symbol;Acc:10330]
AML1.Control-6.smooth.chr19.cher31	Control	19	55893736	55894436	AML1.Control-6 smooth	1.41664	2.40668	TMEM238	388564	ENSG00000233493	55890613	55895627	-1	protein_coding	transmembrane protein 238 [Source:HGNC Symbol;Acc:40042]
AML1.Control-6.smooth.chr19.cher33	Control	19	58034656	58035522	AML1.Control-6 smooth	1.76395	6.35245	ZNF549	256051	ENSG00000121406	58038693	58052124	1	protein_coding	zinc finger protein 549 [Source:HGNC Symbol;Acc:26632]
AML1.Control-6.smooth.chr19.cher34	Control	19	58067078	58067852	AML1.Control-6 smooth	1.44976	1.5953	AC003682.1	162972	ENSG00000251369	58053208	58071207	-1	protein_coding	Zinc finger protein 550 [Source:UniProtKB/Swiss-Prot;Acc:Q7Z398]
AML1.Control-6.smooth.chr19.cher35	Control	19	58096366	58096886	AML1.Control-6 smooth	1.07934	0.196607	ZNF416	55659	ENSG00000083817	58082935	58090243	-1	protein_coding	zinc finger protein 416 [Source:HGNC Symbol;Acc:20645]
AML1.Control-6.smooth.chr19.cher35	Control	19	58096366	58096886	AML1.Control-6 smooth	1.07934	0.196607	ZIK1	284307	ENSG00000171649	58095508	58105253	1	protein_coding	zinc finger protein interacting with K protein 1 homolog (mouse) [Source:HGNC Symbol;Acc:33104]
AML1.Control-6.smooth.chr19.cher36	Control	19	58741092	58742186	AML1.Control-6 smooth	1.73296	4.5083	ZNF544	27300	ENSG00000198131	58740070	58775010	1	protein_coding	zinc finger protein 544 [Source:HGNC Symbol;Acc:16759]
AML1.Control-6.smooth.chr19.cher38	Control	19	59075384	59076114	AML1.Control-6 smooth	1.23271	1.5471	UBE2M	9040	ENSG00000130725	59067080	59070343	-1	protein_coding	ubiquitin-conjugating enzyme E2M [Source:HGNC Symbol;Acc:12491]
AML1.Control-6.smooth.chr1.cher1	Control	1	6192232	6192745	AML1.Control-6 smooth	1.22823	1.17957	CHD5	101928723	ENSG00000116254	6161853	6240183	-1	protein_coding	chromodomain helicase DNA binding protein 5 [Source:HGNC Symbol;Acc:16816]
AML1.Control-6.smooth.chr1.cher2	Control	1	11922058	11922638	AML1.Control-6 smooth	1.2459	1.63995	NPPB	4879	ENSG00000120937	11917521	11918988	-1	protein_coding	natriuretic peptide B [Source:HGNC Symbol;Acc:7940]
AML1.Control-6.smooth.chr1.cher3	Control	1	14920728	14921356	AML1.Control-6 smooth	1.78604	3.15242	KAZN	23254	ENSG00000189337	14925200	15444539	1	protein_coding	kazrin, periplakin interacting protein [Source:HGNC Symbol;Acc:29173]
AML1.Control-6.smooth.chr1.cher4	Control	1	15423623	15424722	AML1.Control-6 smooth	1.13513	1.01718	KAZN	23254	ENSG00000189337	14925200	15444539	1	protein_coding	kazrin, periplakin interacting protein [Source:HGNC Symbol;Acc:29173]
AML1.Control-6.smooth.chr1.cher5	Control	1	16763550	16764146	AML1.Control-6 smooth	1.1872	1.13318	SPATA21	374955	ENSG00000187144	16713612	16763919	-1	protein_coding	spermatogenesis associated 21 [Source:HGNC Symbol;Acc:28026]
AML1.Control-6.smooth.chr1.cher5	Control	1	16763550	16764146	AML1.Control-6 smooth	1.1872	1.13318	NECAP2	55707	ENSG00000157191	16767167	16786573	1	protein_coding	NECAP endocytosis associated 2 [Source:HGNC Symbol;Acc:25528]
AML1.Control-6.smooth.chr1.cher6	Control	1	17452326	17452830	AML1.Control-6 smooth	1.22635	1.08272	PADI2	11240	ENSG00000117115	17393256	17445948	-1	protein_coding	peptidyl arginine deiminase, type II [Source:HGNC Symbol;Acc:18341]
AML1.Control-6.smooth.chr1.cher8	Control	1	19640590	19641106	AML1.Control-6 smooth	1.06821	0.494655	AKR7A2	8574	ENSG00000053371	19630459	19638640	-1	protein_coding	aldo-keto reductase family 7, member A2 (aflatoxin aldehyde reductase) [Source:HGNC Symbol;Acc:389]
AML1.Control-6.smooth.chr1.cher8	Control	1	19640590	19641106	AML1.Control-6 smooth	1.06821	0.494655	PQLC2	54896	ENSG00000040487	19638820	19655794	1	protein_coding	PQ loop repeat containing 2 [Source:HGNC Symbol;Acc:26001]
AML1.Control-6.smooth.chr1.cher9	Control	1	19922804	19923296	AML1.Control-6 smooth	1.31295	1.47286	MINOS1	440574	ENSG00000173436	19923477	19956314	1	protein_coding	mitochondrial inner membrane organizing system 1 [Source:HGNC Symbol;Acc:32068]
AML1.Control-6.smooth.chr1.cher9	Control	1	19922804	19923296	AML1.Control-6 smooth	1.31295	1.47286	RP5-1056L3.1	NA	ENSG00000235185	19918296	19923326	-1	antisense
AML1.Control-6.smooth.chr1.cher10	Control	1	20124690	20125164	AML1.Control-6 smooth	1.12892	0.619719	TMCO4	255104	ENSG00000162542	20008706	20126438	-1	protein_coding	transmembrane and coiled-coil domains 4 [Source:HGNC Symbol;Acc:27393]
AML1.Control-6.smooth.chr1.cher11	Control	1	20988730	20989238	AML1.Control-6 smooth	1.32111	1.35478	DDOST	1650	ENSG00000244038	20978270	20988000	-1	protein_coding	dolichyl-diphosphooligosaccharide--protein glycosyltransferase [Source:HGNC Symbol;Acc:2728]
AML1.Control-6.smooth.chr1.cher12	Control	1	21042926	21043510	AML1.Control-6 smooth	1.43826	1.95296	KIF17	57576	ENSG00000117245	20990507	21044510	-1	protein_coding	kinesin family member 17 [Source:HGNC Symbol;Acc:19167]
AML1.Control-6.smooth.chr1.cher13	Control	1	21620856	21621438	AML1.Control-6 smooth	1.17888	0.871157	ECE1	1889	ENSG00000117298	21543740	21671997	-1	protein_coding	endothelin converting enzyme 1 [Source:HGNC Symbol;Acc:3146]
AML1.Control-6.smooth.chr1.cher13	Control	1	21620856	21621438	AML1.Control-6 smooth	1.17888	0.871157	RP5-1071N3.1	100506801	ENSG00000231105	21619783	21626267	1	antisense
AML1.Control-6.smooth.chr1.cher14	Control	1	24747892	24748374	AML1.Control-6 smooth	1.48646	2.71432	C1orf201	90529	ENSG00000001460	24683489	24743424	-1	protein_coding	chromosome 1 open reading frame 201 [Source:HGNC Symbol;Acc:28070]
AML1.Control-6.smooth.chr1.cher14	Control	1	24747892	24748374	AML1.Control-6 smooth	1.48646	2.71432	NIPAL3	57185	ENSG00000001461	24742284	24799466	1	protein_coding	NIPA-like domain containing 3 [Source:HGNC Symbol;Acc:25233]
AML1.Control-6.smooth.chr1.cher15	Control	1	24825848	24826520	AML1.Control-6 smooth	1.27936	2.00003	RCAN3	11123	ENSG00000117602	24829387	24863506	1	protein_coding	RCAN family member 3 [Source:HGNC Symbol;Acc:3042]
AML1.Control-6.smooth.chr1.cher16	Control	1	24880642	24881262	AML1.Control-6 smooth	1.12393	0.775935	C1orf130	400746	ENSG00000184454	24882602	24935819	1	protein_coding	chromosome 1 open reading frame 130 [Source:HGNC Symbol;Acc:29332]
AML1.Control-6.smooth.chr1.cher17	Control	1	27049381	27049898	AML1.Control-6 smooth	1.02085	0.213964	ARID1A	8289	ENSG00000117713	27022524	27108595	1	protein_coding	AT rich interactive domain 1A (SWI-like) [Source:HGNC Symbol;Acc:11110]
AML1.Control-6.smooth.chr1.cher18	Control	1	27646078	27646674	AML1.Control-6 smooth	1.78097	2.56675	RP11-4K3__A.5	NA	ENSG00000241547	27651820	27652287	1	pseudogene
AML1.Control-6.smooth.chr1.cher18	Control	1	27646078	27646674	AML1.Control-6 smooth	1.78097	2.56675	TMEM222	84065	ENSG00000186501	27648651	27662891	1	protein_coding	transmembrane protein 222 [Source:HGNC Symbol;Acc:25363]
AML1.Control-6.smooth.chr1.cher18	Control	1	27646078	27646674	AML1.Control-6 smooth	1.78097	2.56675	AL663123.1	NA	ENSG00000241856	27641249	27641361	-1	scRNA_pseudogene
AML1.Control-6.smooth.chr1.cher18	Control	1	27646078	27646674	AML1.Control-6 smooth	1.78097	2.56675	U6	100887744	ENSG00000206888	27651710	27651816	1	snRNA	U6 spliceosomal RNA [Source:RFAM;Acc:RF00026]
AML1.Control-6.smooth.chr1.cher19	Control	1	28874952	28875542	AML1.Control-6 smooth	1.20663	1.41588	TRNAU1AP	54952	ENSG00000180098	28879597	28905051	1	protein_coding	tRNA selenocysteine 1 associated protein 1 [Source:HGNC Symbol;Acc:30813]
AML1.Control-6.smooth.chr1.cher20	Control	1	31184594	31185084	AML1.Control-6 smooth	1.44167	2.27834	RP5-1166H10.2	100129196	ENSG00000186056	31190940	31199674	1	antisense
AML1.Control-6.smooth.chr1.cher22	Control	1	32799168	32799780	AML1.Control-6 smooth	1.1095	0.658687	MARCKSL1	65108	ENSG00000175130	32799433	32801980	-1	protein_coding	MARCKS-like 1 [Source:HGNC Symbol;Acc:7142]
AML1.Control-6.smooth.chr1.cher23	Control	1	36546002	36546706	AML1.Control-6 smooth	1.14864	1.15001	TEKT2	27285	ENSG00000092850	36549676	36553876	1	protein_coding	tektin 2 (testicular) [Source:HGNC Symbol;Acc:11725]
AML1.Control-6.smooth.chr1.cher23	Control	1	36546002	36546706	AML1.Control-6 smooth	1.14864	1.15001	RP4-665N4.5	NA	ENSG00000232862	36545921	36546923	-1	pseudogene
AML1.Control-6.smooth.chr1.cher24	Control	1	38478806	38479330	AML1.Control-6 smooth	1.93019	4.90861	UTP11L	51118	ENSG00000183520	38474930	38490496	1	protein_coding	UTP11-like, U3 small nucleolar ribonucleoprotein, (yeast) [Source:HGNC Symbol;Acc:24329]
AML1.Control-6.smooth.chr1.cher25	Control	1	42382420	42382910	AML1.Control-6 smooth	1.49218	2.66353	HIVEP3	59269	ENSG00000127124	41972036	42501596	-1	protein_coding	human immunodeficiency virus type I enhancer binding protein 3 [Source:HGNC Symbol;Acc:13561]
AML1.Control-6.smooth.chr1.cher26	Control	1	43230907	43231514	AML1.Control-6 smooth	1.40525	2.4047	LEPRE1	64175	ENSG00000117385	43212006	43232755	-1	protein_coding	leucine proline-enriched proteoglycan (leprecan) 1 [Source:HGNC Symbol;Acc:19316]
AML1.Control-6.smooth.chr1.cher26	Control	1	43230907	43231514	AML1.Control-6 smooth	1.40525	2.4047	C1orf50	100129924	ENSG00000164008	43232940	43264127	1	protein_coding	chromosome 1 open reading frame 50 [Source:HGNC Symbol;Acc:28795]
AML1.Control-6.smooth.chr1.cher27	Control	1	43749674	43750280	AML1.Control-6 smooth	1.47015	2.56465	C1orf210	149466	ENSG00000253313	43747554	43751288	-1	protein_coding	chromosome 1 open reading frame 210 [Source:HGNC Symbol;Acc:28755]
AML1.Control-6.smooth.chr1.cher28	Control	1	43753878	43754784	AML1.Control-6 smooth	1.54869	2.98912	C1orf210	149466	ENSG00000253313	43747554	43751288	-1	protein_coding	chromosome 1 open reading frame 210 [Source:HGNC Symbol;Acc:28755]
AML1.Control-6.smooth.chr1.cher29	Control	1	43854122	43854723	AML1.Control-6 smooth	1.22276	1.55262	SZT2	23334	ENSG00000198198	43855553	43918321	1	protein_coding	seizure threshold 2 homolog (mouse) [Source:HGNC Symbol;Acc:29040]
AML1.Control-6.smooth.chr1.cher29	Control	1	43854122	43854723	AML1.Control-6 smooth	1.22276	1.55262	MED8	112950	ENSG00000159479	43849588	43855479	-1	protein_coding	mediator complex subunit 8 [Source:HGNC Symbol;Acc:19971]
AML1.Control-6.smooth.chr1.cher30	Control	1	44195178	44195786	AML1.Control-6 smooth	1.34375	1.32119	RP11-184I16.4	101929592	ENSG00000229444	44175063	44193014	-1	antisense
AML1.Control-6.smooth.chr1.cher30	Control	1	44195178	44195786	AML1.Control-6 smooth	1.34375	1.32119	ST3GAL3	6487	ENSG00000126091	44171495	44396831	1	protein_coding	ST3 beta-galactoside alpha-2,3-sialyltransferase 3 [Source:HGNC Symbol;Acc:10866]
AML1.Control-6.smooth.chr1.cher31	Control	1	44427538	44428462	AML1.Control-6 smooth	1.39034	2.09677	IPO13	9670	ENSG00000117408	44412611	44433694	1	protein_coding	importin 13 [Source:HGNC Symbol;Acc:16853]
AML1.Control-6.smooth.chr1.cher32	Control	1	45803481	45803996	AML1.Control-6 smooth	1.05136	0.375727	MUTYH	4595	ENSG00000132781	45794835	45806142	-1	protein_coding	mutY homolog (E. coli) [Source:HGNC Symbol;Acc:7527]
AML1.Control-6.smooth.chr1.cher32	Control	1	45803481	45803996	AML1.Control-6 smooth	1.05136	0.375727	TOE1	114034	ENSG00000132773	45805342	45809647	1	protein_coding	target of EGR1, member 1 (nuclear) [Source:HGNC Symbol;Acc:15954]
AML1.Control-6.smooth.chr1.cher33	Control	1	45956840	45957450	AML1.Control-6 smooth	1.72403	2.51106	TESK2	10420	ENSG00000070759	45809555	45956872	-1	protein_coding	testis-specific kinase 2 [Source:HGNC Symbol;Acc:11732]
AML1.Control-6.smooth.chr1.cher34	Control	1	46526402	46527027	AML1.Control-6 smooth	1.17726	1.17138	PIK3R3	8503	ENSG00000117461	46505812	46642160	-1	protein_coding	phosphoinositide-3-kinase, regulatory subunit 3 (gamma) [Source:HGNC Symbol;Acc:8981]
AML1.Control-6.smooth.chr1.cher35	Control	1	46860928	46861442	AML1.Control-6 smooth	1.00669	0.147054	FAAH	2166	ENSG00000117480	46859937	46879520	1	protein_coding	fatty acid amide hydrolase [Source:HGNC Symbol;Acc:3553]
AML1.Control-6.smooth.chr1.cher36	Control	1	51763322	51763822	AML1.Control-6 smooth	1.45958	2.01226	TTC39A	22996	ENSG00000085831	51752930	51810788	-1	protein_coding	tetratricopeptide repeat domain 39A [Source:HGNC Symbol;Acc:18657]
AML1.Control-6.smooth.chr1.cher37	Control	1	55014258	55015254	AML1.Control-6 smooth	1.53247	3.21137	ACOT11	26027	ENSG00000162390	55007930	55104865	1	protein_coding	acyl-CoA thioesterase 11 [Source:HGNC Symbol;Acc:18156]
AML1.Control-6.smooth.chr1.cher38	Control	1	55161292	55161888	AML1.Control-6 smooth	1.44356	2.17548	HEATR8	374977	ENSG00000184313	55107459	55207981	1	protein_coding	HEAT repeat containing 8 [Source:HGNC Symbol;Acc:24802]
AML1.Control-6.smooth.chr1.cher39	Control	1	65721268	65721900	AML1.Control-6 smooth	1.06924	0.479456	DNAJC6	9829	ENSG00000116675	65713902	65881552	1	protein_coding	DnaJ (Hsp40) homolog, subfamily C, member 6 [Source:HGNC Symbol;Acc:15469]
AML1.Control-6.smooth.chr1.cher40	Control	1	66992324	66993108	AML1.Control-6 smooth	1.60838	4.43372	SGIP1	84251	ENSG00000118473	66999066	67213982	1	protein_coding	SH3-domain GRB2-like (endophilin) interacting protein 1 [Source:HGNC Symbol;Acc:25412]
AML1.Control-6.smooth.chr1.cher41	Control	1	68145824	68146434	AML1.Control-6 smooth	1.11114	0.37423	GADD45A	1647	ENSG00000116717	68150744	68154021	1	protein_coding	growth arrest and DNA-damage-inducible, alpha [Source:HGNC Symbol;Acc:4095]
AML1.Control-6.smooth.chr1.cher42	Control	1	74702416	74702912	AML1.Control-6 smooth	1.13914	0.540779	FPGT-TNNI3K	100526835	ENSG00000116783	74663937	75010112	1	protein_coding	FPGT-TNNI3K readthrough [Source:HGNC Symbol;Acc:42952]
AML1.Control-6.smooth.chr1.cher43	Control	1	78151896	78152534	AML1.Control-6 smooth	1.09	0.631517	ZZZ3	26009	ENSG00000036549	78028101	78149104	-1	protein_coding	zinc finger, ZZ-type containing 3 [Source:HGNC Symbol;Acc:24523]
AML1.Control-6.smooth.chr1.cher44	Control	1	89143416	89144114	AML1.Control-6 smooth	1.05493	0.353935	PKN2	5586	ENSG00000065243	89149905	89301938	1	protein_coding	protein kinase N2 [Source:HGNC Symbol;Acc:9406]
AML1.Control-6.smooth.chr1.cher45	Control	1	89148478	89149013	AML1.Control-6 smooth	1.26777	0.770706	PKN2	5586	ENSG00000065243	89149905	89301938	1	protein_coding	protein kinase N2 [Source:HGNC Symbol;Acc:9406]
AML1.Control-6.smooth.chr1.cher45	Control	1	89148478	89149013	AML1.Control-6 smooth	1.26777	0.770706	RP11-76N22.2	101927891	ENSG00000237505	89003196	89150887	-1	lincRNA
AML1.Control-6.smooth.chr1.cher46	Control	1	90285238	90285756	AML1.Control-6 smooth	1.08239	0.219733	LRRC8D	55144	ENSG00000171492	90286573	90402170	1	protein_coding	leucine rich repeat containing 8 family, member D [Source:HGNC Symbol;Acc:16992]
AML1.Control-6.smooth.chr1.cher47	Control	1	92494810	92495294	AML1.Control-6 smooth	1.04919	0.351981	EPHX4	253152	ENSG00000172031	92495539	92529093	1	protein_coding	epoxide hydrolase 4 [Source:HGNC Symbol;Acc:23758]
AML1.Control-6.smooth.chr1.cher48	Control	1	100428798	100429401	AML1.Control-6 smooth	1.38373	2.04915	SLC35A3	23443	ENSG00000117620	100435345	100492535	1	protein_coding	solute carrier family 35 (UDP-N-acetylglucosamine (UDP-GlcNAc) transporter), member A3 [Source:HGNC Symbol;Acc:11023]
AML1.Control-6.smooth.chr1.cher49	Control	1	109099039	109099534	AML1.Control-6 smooth	1.15734	0.98775	FAM102B	284611	ENSG00000162636	109102711	109187522	1	protein_coding	family with sequence similarity 102, member B [Source:HGNC Symbol;Acc:27637]
AML1.Control-6.smooth.chr1.cher50	Control	1	109774090	109774904	AML1.Control-6 smooth	1.21217	1.46884	SARS	6301	ENSG00000031698	109756540	109780791	1	protein_coding	seryl-tRNA synthetase [Source:HGNC Symbol;Acc:10537]
AML1.Control-6.smooth.chr1.cher51	Control	1	109779814	109780394	AML1.Control-6 smooth	1.24208	1.30082	SARS	6301	ENSG00000031698	109756540	109780791	1	protein_coding	seryl-tRNA synthetase [Source:HGNC Symbol;Acc:10537]
AML1.Control-6.smooth.chr1.cher52	Control	1	109973670	109974274	AML1.Control-6 smooth	1.38079	2.47847	PSMA5	5686	ENSG00000143106	109941653	109969062	-1	protein_coding	proteasome (prosome, macropain) subunit, alpha type, 5 [Source:HGNC Symbol;Acc:9534]
AML1.Control-6.smooth.chr1.cher53	Control	1	110200130	110200730	AML1.Control-6 smooth	1.13382	0.565549	GSTM4	2948	ENSG00000168765	110198703	110208118	1	protein_coding	glutathione S-transferase mu 4 [Source:HGNC Symbol;Acc:4636]
AML1.Control-6.smooth.chr1.cher54	Control	1	110553974	110554683	AML1.Control-6 smooth	1.39509	2.73288	AHCYL1	10768	ENSG00000168710	110527308	110566357	1	protein_coding	adenosylhomocysteinase-like 1 [Source:HGNC Symbol;Acc:344]
AML1.Control-6.smooth.chr1.cher55	Control	1	112013644	112014234	AML1.Control-6 smooth	1.12077	0.545517	C1orf162	128346	ENSG00000143110	112016414	112021134	1	protein_coding	chromosome 1 open reading frame 162 [Source:HGNC Symbol;Acc:28344]
AML1.Control-6.smooth.chr1.cher56	Control	1	114450438	114450932	AML1.Control-6 smooth	1.15665	1.04161	AP4B1	10717	ENSG00000134262	114437370	114447823	-1	protein_coding	adaptor-related protein complex 4, beta 1 subunit [Source:HGNC Symbol;Acc:572]
AML1.Control-6.smooth.chr1.cher56	Control	1	114450438	114450932	AML1.Control-6 smooth	1.15665	1.04161	DCLRE1B	64858	ENSG00000118655	114447763	114456708	1	protein_coding	DNA cross-link repair 1B [Source:HGNC Symbol;Acc:17641]
AML1.Control-6.smooth.chr1.cher57	Control	1	116384834	116385842	AML1.Control-6 smooth	1.30748	2.60471	NHLH2	4808	ENSG00000177551	116378998	116386538	-1	protein_coding	nescient helix loop helix 2 [Source:HGNC Symbol;Acc:7818]
AML1.Control-6.smooth.chr1.cher58	Control	1	117212564	117213374	AML1.Control-6 smooth	1.31097	2.12544	IGSF3	3321	ENSG00000143061	117117031	117210375	-1	protein_coding	immunoglobulin superfamily, member 3 [Source:HGNC Symbol;Acc:5950]
AML1.Control-6.smooth.chr1.cher58	Control	1	117212564	117213374	AML1.Control-6 smooth	1.31097	2.12544	MIR320B1	100302117	ENSG00000211543	117214371	117214449	1	miRNA	microRNA 320b-1 [Source:HGNC Symbol;Acc:35247]
AML1.Control-6.smooth.chr1.cher59	Control	1	149897884	149898494	AML1.Control-6 smooth	1.32236	1.97666	SF3B4	10262	ENSG00000143368	149895209	149900236	-1	protein_coding	splicing factor 3b, subunit 4, 49kDa [Source:HGNC Symbol;Acc:10771]
AML1.Control-6.smooth.chr1.cher60	Control	1	151206972	151207474	AML1.Control-6 smooth	1.31627	1.8341	PIP5K1A	8394	ENSG00000143398	151170425	151222012	1	protein_coding	phosphatidylinositol-4-phosphate 5-kinase, type I, alpha [Source:HGNC Symbol;Acc:8994]
AML1.Control-6.smooth.chr1.cher63	Control	1	151728575	151729198	AML1.Control-6 smooth	1.17348	0.958571	RP11-98D18.7	NA	ENSG00000236940	151730135	151730918	1	pseudogene
AML1.Control-6.smooth.chr1.cher63	Control	1	151728575	151729198	AML1.Control-6 smooth	1.17348	0.958571	OAZ3	51686	ENSG00000143450	151735445	151743808	1	protein_coding	ornithine decarboxylase antizyme 3 [Source:HGNC Symbol;Acc:8097]
AML1.Control-6.smooth.chr1.cher64	Control	1	151887968	151888474	AML1.Control-6 smooth	1.06529	0.511333	THEM4	117145	ENSG00000159445	151846060	151882284	-1	protein_coding	thioesterase superfamily member 4 [Source:HGNC Symbol;Acc:17947]
AML1.Control-6.smooth.chr1.cher65	Control	1	152129332	152130556	AML1.Control-6 smooth	1.40656	3.19017	RPTN	126638	ENSG00000215853	152126071	152131704	-1	protein_coding	repetin [Source:HGNC Symbol;Acc:26809]
AML1.Control-6.smooth.chr1.cher66	Control	1	152386260	152386887	AML1.Control-6 smooth	1.20222	0.909048	CRNN	49860	ENSG00000143536	152381719	152386739	-1	protein_coding	cornulin [Source:HGNC Symbol;Acc:1230]
AML1.Control-6.smooth.chr1.cher67	Control	1	153002717	153003334	AML1.Control-6 smooth	1.25953	0.977271	SPRR1B	6699	ENSG00000169469	153003678	153005376	1	protein_coding	small proline-rich protein 1B [Source:HGNC Symbol;Acc:11260]
AML1.Control-6.smooth.chr1.cher68	Control	1	153523180	153523654	AML1.Control-6 smooth	1.04248	0.364666	S100A4	6275	ENSG00000196154	153516089	153522612	-1	protein_coding	S100 calcium binding protein A4 [Source:HGNC Symbol;Acc:10494]
AML1.Control-6.smooth.chr1.cher68	Control	1	153523180	153523654	AML1.Control-6 smooth	1.04248	0.364666	S100A3	6274	ENSG00000188015	153519805	153521848	-1	protein_coding	S100 calcium binding protein A3 [Source:HGNC Symbol;Acc:10493]
AML1.Control-6.smooth.chr1.cher69	Control	1	154241119	154241620	AML1.Control-6 smooth	1.20349	1.09969	HAX1	10456	ENSG00000143575	154244987	154248351	1	protein_coding	HCLS1 associated protein X-1 [Source:HGNC Symbol;Acc:16915]
AML1.Control-6.smooth.chr1.cher69	Control	1	154241119	154241620	AML1.Control-6 smooth	1.20349	1.09969	UBAP2L	9898	ENSG00000143569	154192655	154243986	1	protein_coding	ubiquitin associated protein 2-like [Source:HGNC Symbol;Acc:29877]
AML1.Control-6.smooth.chr1.cher70	Control	1	155230114	155230736	AML1.Control-6 smooth	1.74956	4.97473	FAM189B	10712	ENSG00000160767	155216996	155225274	-1	protein_coding	family with sequence similarity 189, member B [Source:HGNC Symbol;Acc:1233]
AML1.Control-6.smooth.chr1.cher70	Control	1	155230114	155230736	AML1.Control-6 smooth	1.74956	4.97473	SCAMP3	10067	ENSG00000116521	155225770	155232221	-1	protein_coding	secretory carrier membrane protein 3 [Source:HGNC Symbol;Acc:10565]
AML1.Control-6.smooth.chr1.cher71	Control	1	156122824	156123324	AML1.Control-6 smooth	1.1646	0.889415	SEMA4A	64218	ENSG00000196189	156117157	156147543	1	protein_coding	sema domain, immunoglobulin domain (Ig), transmembrane domain (TM) and short cytoplasmic domain, (semaphorin) 4A [Source:HGNC Symbol;Acc:10729]
AML1.Control-6.smooth.chr1.cher72	Control	1	156572514	156572988	AML1.Control-6 smooth	1.26727	0.96013	GPATCH4	54865	ENSG00000160818	156564279	156571288	-1	protein_coding	G patch domain containing 4 [Source:HGNC Symbol;Acc:25982]
AML1.Control-6.smooth.chr1.cher73	Control	1	156781886	156782592	AML1.Control-6 smooth	1.30813	1.79674	NTRK1	4914	ENSG00000198400	156785432	156851642	1	protein_coding	neurotrophic tyrosine kinase, receptor, type 1 [Source:HGNC Symbol;Acc:8031]
AML1.Control-6.smooth.chr1.cher73	Control	1	156781886	156782592	AML1.Control-6 smooth	1.30813	1.79674	SH2D2A	9047	ENSG00000027869	156776035	156786654	-1	protein_coding	SH2 domain containing 2A [Source:HGNC Symbol;Acc:10821]
AML1.Control-6.smooth.chr1.cher74	Control	1	157075756	157076270	AML1.Control-6 smooth	1.43657	2.36726	ETV3L	440695	ENSG00000253831	157061836	157069600	-1	protein_coding	ets variant 3-like [Source:HGNC Symbol;Acc:33834]
AML1.Control-6.smooth.chr1.cher75	Control	1	157746569	157747170	AML1.Control-6 smooth	1.11591	0.660251	FCRL2	79368	ENSG00000132704	157715521	157746922	-1	protein_coding	Fc receptor-like 2 [Source:HGNC Symbol;Acc:14875]
AML1.Control-6.smooth.chr1.cher76	Control	1	159870396	159871086	AML1.Control-6 smooth	1.25956	1.64391	CCDC19	25790	ENSG00000213085	159842154	159869953	-1	protein_coding	coiled-coil domain containing 19 [Source:HGNC Symbol;Acc:17229]
AML1.Control-6.smooth.chr1.cher77	Control	1	160045788	160046288	AML1.Control-6 smooth	1.25864	1.3619	KCNJ10	3766	ENSG00000177807	160007257	160040038	-1	protein_coding	potassium inwardly-rectifying channel, subfamily J, member 10 [Source:HGNC Symbol;Acc:6256]
AML1.Control-6.smooth.chr1.cher77	Control	1	160045788	160046288	AML1.Control-6 smooth	1.25864	1.3619	KCNJ9	3765	ENSG00000162728	160051360	160060353	1	protein_coding	potassium inwardly-rectifying channel, subfamily J, member 9 [Source:HGNC Symbol;Acc:6270]
AML1.Control-6.smooth.chr1.cher78	Control	1	160337108	160337604	AML1.Control-6 smooth	1.99647	4.58886	NHLH1	4807	ENSG00000171786	160336857	160342638	1	protein_coding	nescient helix loop helix 1 [Source:HGNC Symbol;Acc:7817]
AML1.Control-6.smooth.chr1.cher79	Control	1	161066358	161066858	AML1.Control-6 smooth	1.15116	0.892246	PVRL4	81607	ENSG00000143217	161040785	161059389	-1	protein_coding	poliovirus receptor-related 4 [Source:HGNC Symbol;Acc:19688]
AML1.Control-6.smooth.chr1.cher79	Control	1	161066358	161066858	AML1.Control-6 smooth	1.15116	0.892246	KLHDC9	126823	ENSG00000162755	161068151	161070136	1	protein_coding	kelch domain containing 9 [Source:HGNC Symbol;Acc:28489]
AML1.Control-6.smooth.chr1.cher80	Control	1	161173868	161174472	AML1.Control-6 smooth	1.33657	1.7784	ADAMTS4	9507	ENSG00000158859	161159538	161168846	-1	protein_coding	ADAM metallopeptidase with thrombospondin type 1 motif, 4 [Source:HGNC Symbol;Acc:220]
AML1.Control-6.smooth.chr1.cher80	Control	1	161173868	161174472	AML1.Control-6 smooth	1.33657	1.7784	NDUFS2	4720	ENSG00000158864	161166894	161184185	1	protein_coding	NADH dehydrogenase (ubiquinone) Fe-S protein 2, 49kDa (NADH-coenzyme Q reductase) [Source:HGNC Symbol;Acc:7708]
AML1.Control-6.smooth.chr1.cher81	Control	1	162386566	162387100	AML1.Control-6 smooth	1.25219	1.13775	SH2D1B	117157	ENSG00000198574	162365056	162381928	-1	protein_coding	SH2 domain containing 1B [Source:HGNC Symbol;Acc:30416]
AML1.Control-6.smooth.chr1.cher82	Control	1	165180344	165181066	AML1.Control-6 smooth	1.3262	2.11331	RP11-38C18.3	NA	ENSG00000238022	165185217	165188341	1	antisense
AML1.Control-6.smooth.chr1.cher82	Control	1	165180344	165181066	AML1.Control-6 smooth	1.3262	2.11331	RP11-38C18.2	NA	ENSG00000224702	165179864	165182327	1	antisense
AML1.Control-6.smooth.chr1.cher82	Control	1	165180344	165181066	AML1.Control-6 smooth	1.3262	2.11331	LMX1A	4009	ENSG00000162761	165171104	165325952	-1	protein_coding	LIM homeobox transcription factor 1, alpha [Source:HGNC Symbol;Acc:6653]
AML1.Control-6.smooth.chr1.cher83	Control	1	166943388	166944204	AML1.Control-6 smooth	1.87324	5.62622	ILDR2	387597	ENSG00000143195	166887996	166944719	-1	protein_coding	immunoglobulin-like domain containing receptor 2 [Source:HGNC Symbol;Acc:18131]
AML1.Control-6.smooth.chr1.cher84	Control	1	168333592	168334316	AML1.Control-6 smooth	1.22725	1.84243	RP5-1059H15.1	NA	ENSG00000227722	168338292	168338839	1	pseudogene
AML1.Control-6.smooth.chr1.cher85	Control	1	168337390	168338008	AML1.Control-6 smooth	1.00645	0.13575	RP5-1059H15.1	NA	ENSG00000227722	168338292	168338839	1	pseudogene
AML1.Control-6.smooth.chr1.cher85	Control	1	168337390	168338008	AML1.Control-6 smooth	1.00645	0.13575	MIR557	693142	ENSG00000207974	168344762	168344859	1	miRNA	microRNA 557 [Source:HGNC Symbol;Acc:32813]
AML1.Control-6.smooth.chr1.cher86	Control	1	169072200	169072800	AML1.Control-6 smooth	1.21133	1.42812	RP5-1018K9.1	101928596	ENSG00000237707	169073362	169074145	1	antisense
AML1.Control-6.smooth.chr1.cher86	Control	1	169072200	169072800	AML1.Control-6 smooth	1.21133	1.42812	ATP1B1	481	ENSG00000143153	169074935	169101960	1	protein_coding	ATPase, Na+/K+ transporting, beta 1 polypeptide [Source:HGNC Symbol;Acc:804]
AML1.Control-6.smooth.chr1.cher87	Control	1	171752294	171752984	AML1.Control-6 smooth	1.46825	2.19549	METTL13	51603	ENSG00000010165	171750788	171783163	1	protein_coding	methyltransferase like 13 [Source:HGNC Symbol;Acc:24248]
AML1.Control-6.smooth.chr1.cher88	Control	1	172410338	172411034	AML1.Control-6 smooth	1.31504	1.90159	C1orf105	92346	ENSG00000180999	172389828	172437971	1	protein_coding	chromosome 1 open reading frame 105 [Source:HGNC Symbol;Acc:29591]
AML1.Control-6.smooth.chr1.cher88	Control	1	172410338	172411034	AML1.Control-6 smooth	1.31504	1.90159	PIGC	5279	ENSG00000135845	172339329	172413230	-1	protein_coding	phosphatidylinositol glycan anchor biosynthesis, class C [Source:HGNC Symbol;Acc:8960]
AML1.Control-6.smooth.chr1.cher90	Control	1	177941078	177941608	AML1.Control-6 smooth	1.24766	0.556014	SEC16B	89866	ENSG00000120341	177896701	177995366	-1	protein_coding	Protein transport protein Sec16B [Source:UniProtKB/Swiss-Prot;Acc:Q96JE7]
AML1.Control-6.smooth.chr1.cher91	Control	1	182362733	182363450	AML1.Control-6 smooth	1.37422	2.62306	GLUL	2752	ENSG00000135821	182350839	182361341	-1	protein_coding	glutamate-ammonia ligase [Source:HGNC Symbol;Acc:4341]
AML1.Control-6.smooth.chr1.cher92	Control	1	182641576	182642446	AML1.Control-6 smooth	1.39477	1.60101	RGS8	85397	ENSG00000135824	182615239	182653711	-1	protein_coding	regulator of G-protein signaling 8 [Source:HGNC Symbol;Acc:16810]
AML1.Control-6.smooth.chr1.cher93	Control	1	183443978	183444569	AML1.Control-6 smooth	1.77	4.53305	RP11-74N20.1	284649	ENSG00000232860	183430009	183441400	-1	lincRNA
AML1.Control-6.smooth.chr1.cher93	Control	1	183443978	183444569	AML1.Control-6 smooth	1.77	4.53305	SMG7	9887	ENSG00000116698	183441351	183567381	1	protein_coding	smg-7 homolog, nonsense mediated mRNA decay factor (C. elegans) [Source:HGNC Symbol;Acc:16792]
AML1.Control-6.smooth.chr1.cher94	Control	1	183623080	183623599	AML1.Control-6 smooth	1.32076	1.86757	APOBEC4	403314	ENSG00000173627	183615541	183622451	-1	protein_coding	apolipoprotein B mRNA editing enzyme, catalytic polypeptide-like 4 (putative) [Source:HGNC Symbol;Acc:32152]
AML1.Control-6.smooth.chr1.cher95	Control	1	183936866	183937386	AML1.Control-6 smooth	1.09071	0.578091	GLT25D2	23127	ENSG00000198756	183898796	184006863	-1	protein_coding	glycosyltransferase 25 domain containing 2 [Source:HGNC Symbol;Acc:16790]
AML1.Control-6.smooth.chr1.cher96	Control	1	196583302	196584014	AML1.Control-6 smooth	1.31812	2.30687	KCNT2	343450	ENSG00000162687	196194909	196577541	-1	protein_coding	potassium channel, subfamily T, member 2 [Source:HGNC Symbol;Acc:18866]
AML1.Control-6.smooth.chr1.cher97	Control	1	201795674	201796374	AML1.Control-6 smooth	1.42756	2.33672	IPO9	55705	ENSG00000198700	201798269	201853422	1	protein_coding	importin 9 [Source:HGNC Symbol;Acc:19425]
AML1.Control-6.smooth.chr1.cher97	Control	1	201795674	201796374	AML1.Control-6 smooth	1.42756	2.33672	IPO9-AS1	100873949	ENSG00000231871	201657387	201798687	-1	antisense	IPO9 antisense RNA 1 (non-protein coding) [Source:HGNC Symbol;Acc:40892]
AML1.Control-6.smooth.chr1.cher98	Control	1	202119990	202120614	AML1.Control-6 smooth	1.41437	1.943	ARL8A	127829	ENSG00000143862	202102532	202113869	-1	protein_coding	ADP-ribosylation factor-like 8A [Source:HGNC Symbol;Acc:25192]
AML1.Control-6.smooth.chr1.cher99	Control	1	202171342	202172166	AML1.Control-6 smooth	1.1778	0.964704	LGR6	59352	ENSG00000133067	202162938	202288909	1	protein_coding	leucine-rich repeat containing G protein-coupled receptor 6 [Source:HGNC Symbol;Acc:19719]
AML1.Control-6.smooth.chr1.cher99	Control	1	202171342	202172166	AML1.Control-6 smooth	1.1778	0.964704	snoU13	NA	ENSG00000238571	202166756	202166859	-1	snoRNA	Small nucleolar RNA U13 [Source:RFAM;Acc:RF01210]
AML1.Control-6.smooth.chr1.cher100	Control	1	204181076	204182076	AML1.Control-6 smooth	1.52058	2.25113	GOLT1A	127845	ENSG00000174567	204167288	204183220	-1	protein_coding	golgi transport 1A [Source:HGNC Symbol;Acc:24766]
AML1.Control-6.smooth.chr1.cher101	Control	1	204184382	204184846	AML1.Control-6 smooth	1.69893	3.00964	GOLT1A	127845	ENSG00000174567	204167288	204183220	-1	protein_coding	golgi transport 1A [Source:HGNC Symbol;Acc:24766]
AML1.Control-6.smooth.chr1.cher102	Control	1	205427469	205428054	AML1.Control-6 smooth	1.19973	1.34132	LEMD1	93273	ENSG00000186007	205350506	205425082	-1	protein_coding	LEM domain containing 1 [Source:HGNC Symbol;Acc:18725]
AML1.Control-6.smooth.chr1.cher102	Control	1	205427469	205428054	AML1.Control-6 smooth	1.19973	1.34132	RP11-576D8.4	284577	ENSG00000224717	205425057	205438152	1	lincRNA
AML1.Control-6.smooth.chr1.cher103	Control	1	207264658	207265442	AML1.Control-6 smooth	1.50471	3.09235	C4BPB	725	ENSG00000123843	207262187	207273338	1	protein_coding	complement component 4 binding protein, beta [Source:HGNC Symbol;Acc:1328]
AML1.Control-6.smooth.chr1.cher104	Control	1	207490190	207490910	AML1.Control-6 smooth	1.18137	1.19772	CD55	1604	ENSG00000196352	207494853	207534311	1	protein_coding	CD55 molecule, decay accelerating factor for complement (Cromer blood group) [Source:HGNC Symbol;Acc:2665]
AML1.Control-6.smooth.chr1.cher106	Control	1	209981748	209982318	AML1.Control-6 smooth	1.32974	1.13545	IRF6	3664	ENSG00000117595	209959036	209979465	-1	protein_coding	interferon regulatory factor 6 [Source:HGNC Symbol;Acc:6121]
AML1.Control-6.smooth.chr1.cher107	Control	1	211849986	211850587	AML1.Control-6 smooth	1.47919	2.05306	RP11-122M14.1	91548	ENSG00000231057	211849104	211860801	1	antisense
AML1.Control-6.smooth.chr1.cher107	Control	1	211849986	211850587	AML1.Control-6 smooth	1.47919	2.05306	NEK2	4751	ENSG00000117650	211836114	211848960	-1	protein_coding	NIMA (never in mitosis gene a)-related kinase 2 [Source:HGNC Symbol;Acc:7745]
AML1.Control-6.smooth.chr1.cher108	Control	1	215174869	215175372	AML1.Control-6 smooth	1.06593	0.467001	KCNK2	3776	ENSG00000082482	215179118	215410436	1	protein_coding	potassium channel, subfamily K, member 2 [Source:HGNC Symbol;Acc:6277]
AML1.Control-6.smooth.chr1.cher109	Control	1	223306626	223307132	AML1.Control-6 smooth	1.29592	1.74505	TLR5	7100	ENSG00000187554	223282748	223316624	-1	protein_coding	toll-like receptor 5 [Source:HGNC Symbol;Acc:11851]
AML1.Control-6.smooth.chr1.cher110	Control	1	225601856	225602360	AML1.Control-6 smooth	1.00701	0.116964	LBR	3930	ENSG00000143815	225589204	225616627	-1	protein_coding	lamin B receptor [Source:HGNC Symbol;Acc:6518]
AML1.Control-6.smooth.chr1.cher111	Control	1	226413467	226413967	AML1.Control-6 smooth	2.01189	4.73765	MIXL1	83881	ENSG00000185155	226411319	226414785	1	protein_coding	Mix paired-like homeobox [Source:HGNC Symbol;Acc:13363]
AML1.Control-6.smooth.chr1.cher112	Control	1	228865811	228866502	AML1.Control-6 smooth	1.2467	1.2203	RHOU	58480	ENSG00000116574	228870824	228882416	1	protein_coding	ras homolog family member U [Source:HGNC Symbol;Acc:17794]
AML1.Control-6.smooth.chr1.cher113	Control	1	229436126	229436714	AML1.Control-6 smooth	1.0282	0.285726	SPHAR	10638	ENSG00000213029	229440129	229441248	1	protein_coding	S-phase response (cyclin related) [Source:HGNC Symbol;Acc:16957]
AML1.Control-6.smooth.chr1.cher114	Control	1	231299826	231300316	AML1.Control-6 smooth	1.11194	0.738646	TRIM67	440730	ENSG00000119283	231297858	231357302	1	protein_coding	tripartite motif containing 67 [Source:HGNC Symbol;Acc:31859]
AML1.Control-6.smooth.chr1.cher115	Control	1	231383326	231383844	AML1.Control-6 smooth	1.64233	3.26217	C1orf131	128061	ENSG00000143633	231359509	231376933	-1	protein_coding	chromosome 1 open reading frame 131 [Source:HGNC Symbol;Acc:25332]
AML1.Control-6.smooth.chr1.cher116	Control	1	232942013	232942490	AML1.Control-6 smooth	1.03181	0.0850939	KIAA1383	54627	ENSG00000212916	232940643	232946092	1	protein_coding	KIAA1383 [Source:HGNC Symbol;Acc:29265]
AML1.Control-6.smooth.chr1.cher117	Control	1	235324704	235325204	AML1.Control-6 smooth	1.20418	0.736034	RBM34	23029	ENSG00000188739	235294498	235324772	-1	protein_coding	RNA binding motif protein 34 [Source:HGNC Symbol;Acc:28965]
AML1.Control-6.smooth.chr1.cher118	Control	1	235398548	235399042	AML1.Control-6 smooth	1.08553	0.353791	ARID4B	51742	ENSG00000054267	235294949	235491534	-1	protein_coding	AT rich interactive domain 4B (RBP1-like) [Source:HGNC Symbol;Acc:15550]
AML1.Control-6.smooth.chr1.cher119	Control	1	236049294	236049770	AML1.Control-6 smooth	1.29515	1.70419	LYST	1130	ENSG00000143669	235824341	236046940	-1	protein_coding	lysosomal trafficking regulator [Source:HGNC Symbol;Acc:1968]
AML1.Control-6.smooth.chr1.cher120	Control	1	236683609	236684796	AML1.Control-6 smooth	1.44045	2.20197	LGALS8	3964	ENSG00000116977	236681300	236716281	1	protein_coding	lectin, galactoside-binding, soluble, 8 [Source:HGNC Symbol;Acc:6569]
AML1.Control-6.smooth.chr1.cher121	Control	1	240620138	240620632	AML1.Control-6 smooth	1.38629	2.18291	FMN2	56776	ENSG00000155816	240177648	240655529	1	protein_coding	formin 2 [Source:HGNC Symbol;Acc:14074]
AML1.Control-6.smooth.chr1.cher122	Control	1	249153754	249154385	AML1.Control-6 smooth	1.42178	1.65502	ZNF692	55657	ENSG00000171163	249144205	249153343	-1	protein_coding	zinc finger protein 692 [Source:HGNC Symbol;Acc:26049]
AML1.Control-6.smooth.chr1.cher122	Control	1	249153754	249154385	AML1.Control-6 smooth	1.42178	1.65502	AL672294.1	NA	ENSG00000227237	249153363	249158995	1	antisense
AML1.Control-6.smooth.chr20.cher1	Control	20	634996	635492	AML1.Control-6 smooth	1.28326	1.07736	SRXN1	NA	ENSG00000172070	627259	656444	-1	protein_coding	sulfiredoxin 1 [Source:HGNC Symbol;Acc:16132]
AML1.Control-6.smooth.chr20.cher1	Control	20	634996	635492	AML1.Control-6 smooth	1.28326	1.07736	AL121758.1	NA	ENSG00000234516	627270	629157	-1	protein_coding	CDNA FLJ25552 fis, clone JTH02127; HBV preS1-transactivated protein 5; Sulfiredoxin 1 homolog (S. cerevisiae), isoform CRA_a; Uncharacterized protein [Source:UniProtKB/TrEMBL;Acc:Q8N7H8]
AML1.Control-6.smooth.chr20.cher2	Control	20	984860	985646	AML1.Control-6 smooth	1.36854	2.32707	RSPO4	343637	ENSG00000101282	939095	982907	-1	protein_coding	R-spondin 4 [Source:HGNC Symbol;Acc:16175]
AML1.Control-6.smooth.chr20.cher3	Control	20	1099774	1100494	AML1.Control-6 smooth	2.03766	7.30454	PSMF1	9491	ENSG00000125818	1093906	1149022	1	protein_coding	proteasome (prosome, macropain) inhibitor subunit 1 (PI31) [Source:HGNC Symbol;Acc:9571]
AML1.Control-6.smooth.chr20.cher4	Control	20	1448526	1449412	AML1.Control-6 smooth	1.29127	2.63103	NSFL1C	55968	ENSG00000088833	1422807	1448417	-1	protein_coding	NSFL1 (p97) cofactor (p47) [Source:HGNC Symbol;Acc:15912]
AML1.Control-6.smooth.chr20.cher5	Control	20	2630428	2631112	AML1.Control-6 smooth	1.35597	2.17369	SNORD56	26793	ENSG00000229686	2637270	2637340	1	processed_transcript	small nucleolar RNA, C/D box 56 [Source:HGNC Symbol;Acc:10206]
AML1.Control-6.smooth.chr20.cher5	Control	20	2630428	2631112	AML1.Control-6 smooth	1.35597	2.17369	SNORD57	26792	ENSG00000226572	2637585	2637656	1	processed_transcript	small nucleolar RNA, C/D box 57 [Source:HGNC Symbol;Acc:10207]
AML1.Control-6.smooth.chr20.cher5	Control	20	2630428	2631112	AML1.Control-6 smooth	1.35597	2.17369	NOP56	100302138	ENSG00000101361	2632791	2639039	1	protein_coding	NOP56 ribonucleoprotein homolog (yeast) [Source:HGNC Symbol;Acc:15911]
AML1.Control-6.smooth.chr20.cher5	Control	20	2630428	2631112	AML1.Control-6 smooth	1.35597	2.17369	MIR1292	100302138	ENSG00000221062	2633423	2633488	1	miRNA	microRNA 1292 [Source:HGNC Symbol;Acc:35364]
AML1.Control-6.smooth.chr20.cher5	Control	20	2630428	2631112	AML1.Control-6 smooth	1.35597	2.17369	SNORD110	692213	ENSG00000221116	2634858	2634932	1	snoRNA	small nucleolar RNA, C/D box 110 [Source:HGNC Symbol;Acc:32775]
AML1.Control-6.smooth.chr20.cher5	Control	20	2630428	2631112	AML1.Control-6 smooth	1.35597	2.17369	SNORA51	NA	ENSG00000207427	2635713	2635844	1	snoRNA	small nucleolar RNA, H/ACA box 51 [Source:HGNC Symbol;Acc:32644]
AML1.Control-6.smooth.chr20.cher5	Control	20	2630428	2631112	AML1.Control-6 smooth	1.35597	2.17369	SNORD86	692201	ENSG00000212498	2636743	2636828	1	snoRNA	small nucleolar RNA, C/D box 86 [Source:HGNC Symbol;Acc:32745]
AML1.Control-6.smooth.chr20.cher5	Control	20	2630428	2631112	AML1.Control-6 smooth	1.35597	2.17369	SNORD56	NA	ENSG00000206794	2637270	2637340	1	snoRNA	Small nucleolar RNA SNORD56 [Source:RFAM;Acc:RF00275]
AML1.Control-6.smooth.chr20.cher5	Control	20	2630428	2631112	AML1.Control-6 smooth	1.35597	2.17369	SNORD57	NA	ENSG00000207262	2637585	2637656	1	snoRNA	Small nucleolar RNA SNORD57 [Source:RFAM;Acc:RF00274]
AML1.Control-6.smooth.chr20.cher6	Control	20	3189344	3189838	AML1.Control-6 smooth	1.22658	0.999113	DDRGK1	65992	ENSG00000198171	3170996	3185331	-1	protein_coding	DDRGK domain containing 1 [Source:HGNC Symbol;Acc:16110]
AML1.Control-6.smooth.chr20.cher6	Control	20	3189344	3189838	AML1.Control-6 smooth	1.22658	0.999113	ITPA	3704	ENSG00000125877	3189514	3204516	1	protein_coding	inosine triphosphatase (nucleoside triphosphate pyrophosphatase) [Source:HGNC Symbol;Acc:6176]
AML1.Control-6.smooth.chr20.cher7	Control	20	4161176	4161786	AML1.Control-6 smooth	1.01238	0.171964	SMOX	54498	ENSG00000088826	4101627	4168394	1	protein_coding	spermine oxidase [Source:HGNC Symbol;Acc:15862]
AML1.Control-6.smooth.chr20.cher8	Control	20	4698598	4699382	AML1.Control-6 smooth	1.12592	0.997502	PRND	23627	ENSG00000171864	4702556	4709106	1	protein_coding	prion protein 2 (dublet) [Source:HGNC Symbol;Acc:15748]
AML1.Control-6.smooth.chr20.cher9	Control	20	5092903	5093394	AML1.Control-6 smooth	1.12631	0.778345	TMEM230	29058	ENSG00000089063	5080486	5093749	-1	protein_coding	transmembrane protein 230 [Source:HGNC Symbol;Acc:15876]
AML1.Control-6.smooth.chr20.cher10	Control	20	5446408	5446892	AML1.Control-6 smooth	1.04381	0.336588	RP5-828H9.1	643406	ENSG00000230563	5451853	5455828	1	processed_transcript
AML1.Control-6.smooth.chr20.cher11	Control	20	6746857	6747446	AML1.Control-6 smooth	1.32902	0.478793	BMP2	650	ENSG00000125845	6748311	6760910	1	protein_coding	bone morphogenetic protein 2 [Source:HGNC Symbol;Acc:1069]
AML1.Control-6.smooth.chr20.cher12	Control	20	9497428	9498026	AML1.Control-6 smooth	1.3725	2.4658	RP5-1119D9.4	101929329	ENSG00000225988	9485827	9495645	-1	antisense
AML1.Control-6.smooth.chr20.cher12	Control	20	9497428	9498026	AML1.Control-6 smooth	1.3725	2.4658	LAMP5	24141	ENSG00000125869	9495008	9511171	1	protein_coding	lysosomal-associated membrane protein family, member 5 [Source:HGNC Symbol;Acc:16097]
AML1.Control-6.smooth.chr20.cher13	Control	20	9818054	9818738	AML1.Control-6 smooth	1.35956	2.27588	PAK7	57144	ENSG00000101349	9518036	9819689	-1	protein_coding	p21 protein (Cdc42/Rac)-activated kinase 7 [Source:HGNC Symbol;Acc:15916]
AML1.Control-6.smooth.chr20.cher15	Control	20	15909638	15910428	AML1.Control-6 smooth	1.34095	1.60352	MACROD2	140733	ENSG00000172264	13976015	16033842	1	protein_coding	MACRO domain containing 2 [Source:HGNC Symbol;Acc:16126]
AML1.Control-6.smooth.chr20.cher17	Control	20	17540556	17541036	AML1.Control-6 smooth	1.18523	0.914166	BFSP1	631	ENSG00000125864	17474550	17549865	-1	protein_coding	beaded filament structural protein 1, filensin [Source:HGNC Symbol;Acc:1040]
AML1.Control-6.smooth.chr20.cher18	Control	20	24977372	24977862	AML1.Control-6 smooth	1.17827	0.756255	C20orf3	57136	ENSG00000101474	24943561	24973615	-1	protein_coding	chromosome 20 open reading frame 3 [Source:HGNC Symbol;Acc:13238]
AML1.Control-6.smooth.chr20.cher19	Control	20	25608918	25609506	AML1.Control-6 smooth	1.00132	0.131998	RP4-694B14.5	NA	ENSG00000213742	25604681	25658710	1	antisense
AML1.Control-6.smooth.chr20.cher19	Control	20	25608918	25609506	AML1.Control-6 smooth	1.00132	0.131998	NANP	140838	ENSG00000170191	25593571	25604811	-1	protein_coding	N-acetylneuraminic acid phosphatase [Source:HGNC Symbol;Acc:16140]
AML1.Control-6.smooth.chr20.cher20	Control	20	29955464	29956285	AML1.Control-6 smooth	1.5099	2.19125	DEFB118	117285	ENSG00000131068	29956421	29961726	1	protein_coding	defensin, beta 118 [Source:HGNC Symbol;Acc:16196]
AML1.Control-6.smooth.chr20.cher21	Control	20	31174416	31175410	AML1.Control-6 smooth	1.03232	0.402145	C20orf112	140688	ENSG00000197183	31030862	31172876	-1	protein_coding	chromosome 20 open reading frame 112 [Source:HGNC Symbol;Acc:16106]
AML1.Control-6.smooth.chr20.cher21	Control	20	31174416	31175410	AML1.Control-6 smooth	1.03232	0.402145	RP11-410N8.4	NA	ENSG00000204393	31175281	31196695	1	protein_coding
AML1.Control-6.smooth.chr20.cher22	Control	20	34818336	34818838	AML1.Control-6 smooth	1.04135	0.343507	C20orf4	25980	ENSG00000131043	34824381	34858840	1	protein_coding	chromosome 20 open reading frame 4 [Source:HGNC Symbol;Acc:15886]
AML1.Control-6.smooth.chr20.cher23	Control	20	35279812	35280432	AML1.Control-6 smooth	1.07462	0.583465	SLA2	84174	ENSG00000101082	35240721	35274619	-1	protein_coding	Src-like-adaptor 2 [Source:HGNC Symbol;Acc:17329]
AML1.Control-6.smooth.chr20.cher24	Control	20	41823504	41824086	AML1.Control-6 smooth	1.43512	2.71495	PTPRT	11122	ENSG00000196090	40701392	41818610	-1	protein_coding	protein tyrosine phosphatase, receptor type, T [Source:HGNC Symbol;Acc:9682]
AML1.Control-6.smooth.chr20.cher26	Control	20	42840526	42841051	AML1.Control-6 smooth	1.23805	1.36495	C20orf111	51526	ENSG00000132823	42825136	42839431	-1	protein_coding	chromosome 20 open reading frame 111 [Source:HGNC Symbol;Acc:16105]
AML1.Control-6.smooth.chr20.cher26	Control	20	42840526	42841051	AML1.Control-6 smooth	1.23805	1.36495	RP5-995J12.2	100505783	ENSG00000223891	42839600	42854667	1	lincRNA
AML1.Control-6.smooth.chr20.cher27	Control	20	43753406	43754019	AML1.Control-6 smooth	1.20644	1.50357	WFDC12	128488	ENSG00000168703	43752066	43753106	-1	protein_coding	WAP four-disulfide core domain 12 [Source:HGNC Symbol;Acc:16115]
AML1.Control-6.smooth.chr20.cher28	Control	20	45003982	45004582	AML1.Control-6 smooth	1.37851	2.51387	ELMO2	63916	ENSG00000062598	44994688	45061704	-1	protein_coding	engulfment and cell motility 2 [Source:HGNC Symbol;Acc:17233]
AML1.Control-6.smooth.chr20.cher29	Control	20	45339906	45340542	AML1.Control-6 smooth	1.23057	1.37367	SLC2A10	81031	ENSG00000197496	45338126	45364965	1	protein_coding	solute carrier family 2 (facilitated glucose transporter), member 10 [Source:HGNC Symbol;Acc:13444]
AML1.Control-6.smooth.chr20.cher30	Control	20	47887906	47888412	AML1.Control-6 smooth	1.20837	0.753996	ZNFX1-AS1	441951	ENSG00000177410	47894715	47905797	1	lincRNA	ZNFX1 antisense RNA 1 (non-protein coding) [Source:HGNC Symbol;Acc:33101]
AML1.Control-6.smooth.chr20.cher30	Control	20	47887906	47888412	AML1.Control-6 smooth	1.20837	0.753996	ZNFX1	57169	ENSG00000124201	47826982	47894963	-1	protein_coding	zinc finger, NFX1-type containing 1 [Source:HGNC Symbol;Acc:29271]
AML1.Control-6.smooth.chr20.cher31	Control	20	55941949	55942444	AML1.Control-6 smooth	1.20469	0.778168	RAE1	8480	ENSG00000101146	55926066	55954267	1	protein_coding	RAE1 RNA export 1 homolog (S. pombe) [Source:HGNC Symbol;Acc:9828]
AML1.Control-6.smooth.chr20.cher31	Control	20	55941949	55942444	AML1.Control-6 smooth	1.20469	0.778168	AL109955.2	NA	ENSG00000242760	55935047	55935115	-1	Mt_tRNA_pseudogene
AML1.Control-6.smooth.chr20.cher31	Control	20	55941949	55942444	AML1.Control-6 smooth	1.20469	0.778168	AL109955.1	NA	ENSG00000239561	55936040	55936110	-1	Mt_tRNA_pseudogene
AML1.Control-6.smooth.chr20.cher32	Control	20	55944520	55945116	AML1.Control-6 smooth	1.19555	1.46226	RAE1	8480	ENSG00000101146	55926066	55954267	1	protein_coding	RAE1 RNA export 1 homolog (S. pombe) [Source:HGNC Symbol;Acc:9828]
AML1.Control-6.smooth.chr20.cher33	Control	20	56290470	56291016	AML1.Control-6 smooth	2.19389	5.19179	PMEPA1	56937	ENSG00000124225	56223448	56286592	-1	protein_coding	prostate transmembrane protein, androgen induced 1 [Source:HGNC Symbol;Acc:14107]
AML1.Control-6.smooth.chr20.cher34	Control	20	57612007	57612578	AML1.Control-6 smooth	1.62187	2.76182	ATP5E	514	ENSG00000124172	57600522	57607437	-1	protein_coding	ATP synthase, H+ transporting, mitochondrial F1 complex, epsilon subunit [Source:HGNC Symbol;Acc:838]
AML1.Control-6.smooth.chr20.cher35	Control	20	61570572	61571302	AML1.Control-6 smooth	2.10345	6.1291	DIDO1	11083	ENSG00000101191	61509090	61569304	-1	protein_coding	death inducer-obliterator 1 [Source:HGNC Symbol;Acc:2680]
AML1.Control-6.smooth.chr20.cher35	Control	20	61570572	61571302	AML1.Control-6 smooth	2.10345	6.1291	C20orf11	54994	ENSG00000101193	61569471	61578019	1	protein_coding	chromosome 20 open reading frame 11 [Source:HGNC Symbol;Acc:15857]
AML1.Control-6.smooth.chr21.cher1	Control	21	33750406	33751210	AML1.Control-6 smooth	1.98188	6.71578	SNORA80	677846	ENSG00000200792	33749496	33749631	-1	snoRNA	small nucleolar RNA, H/ACA box 80 [Source:HGNC Symbol;Acc:32666]
AML1.Control-6.smooth.chr21.cher5	Control	21	34522100	34522592	AML1.Control-6 smooth	1.82704	4.85361	AP000290.7	NA	ENSG00000226433	34528938	34531416	1	antisense
AML1.Control-6.smooth.chr21.cher6	Control	21	34650692	34651210	AML1.Control-6 smooth	1.0016	0.0898997	IL10RB	3588	ENSG00000243646	34638663	34669539	1	protein_coding	interleukin 10 receptor, beta [Source:HGNC Symbol;Acc:5965]
AML1.Control-6.smooth.chr21.cher7	Control	21	34883216	34883816	AML1.Control-6 smooth	1.0702	0.542113	GART	2618	ENSG00000159131	34870940	34915797	-1	protein_coding	phosphoribosylglycinamide formyltransferase, phosphoribosylglycinamide synthetase, phosphoribosylaminoimidazole synthetase [Source:HGNC Symbol;Acc:4163]
AML1.Control-6.smooth.chr21.cher11	Control	21	37838080	37838555	AML1.Control-6 smooth	1.12632	0.746099	CLDN14	23562	ENSG00000159261	37832919	37948867	-1	protein_coding	claudin 14 [Source:HGNC Symbol;Acc:2035]
AML1.Control-6.smooth.chr21.cher12	Control	21	38458688	38459985	AML1.Control-6 smooth	1.54082	4.94631	TTC3	286495	ENSG00000182670	38445526	38575413	1	protein_coding	tetratricopeptide repeat domain 3 [Source:HGNC Symbol;Acc:12393]
AML1.Control-6.smooth.chr21.cher13	Control	21	40314252	40314756	AML1.Control-6 smooth	1.34437	1.99755	AF064858.6	400867	ENSG00000205622	40249215	40328392	-1	lincRNA
AML1.Control-6.smooth.chr21.cher14	Control	21	40332558	40333048	AML1.Control-6 smooth	1.13419	0.424854	AF064858.6	400867	ENSG00000205622	40249215	40328392	-1	lincRNA
AML1.Control-6.smooth.chr21.cher15	Control	21	40407254	40407732	AML1.Control-6 smooth	1.11908	0.748387	AF064858.10	NA	ENSG00000237609	40400461	40401053	-1	lincRNA
AML1.Control-6.smooth.chr21.cher17	Control	21	40798624	40799154	AML1.Control-6 smooth	1.00873	0.134741	WRB	7485	ENSG00000182093	40752170	40800454	1	protein_coding	tryptophan rich basic protein [Source:HGNC Symbol;Acc:12790]
AML1.Control-6.smooth.chr21.cher18	Control	21	42742422	42742913	AML1.Control-6 smooth	1.06794	0.514818	MX2	4600	ENSG00000183486	42733870	45746674	1	protein_coding	myxovirus (influenza virus) resistance 2 (mouse) [Source:HGNC Symbol;Acc:7533]
AML1.Control-6.smooth.chr21.cher19	Control	21	43432808	43433298	AML1.Control-6 smooth	1.58253	3.58903	ZNF295	49854	ENSG00000173276	43406940	43430496	-1	protein_coding	zinc finger protein 295 [Source:HGNC Symbol;Acc:13083]
AML1.Control-6.smooth.chr21.cher20	Control	21	44421064	44421578	AML1.Control-6 smooth	1.42709	1.69388	PKNOX1	5316	ENSG00000160199	44394620	44454172	1	protein_coding	PBX/knotted 1 homeobox 1 [Source:HGNC Symbol;Acc:9022]
AML1.Control-6.smooth.chr21.cher21	Control	21	46077331	46077812	AML1.Control-6 smooth	1.20018	1.07309	KRTAP12-3	386683	ENSG00000205439	46067057	46078258	1	protein_coding	keratin associated protein 12-3 [Source:HGNC Symbol;Acc:20531]
AML1.Control-6.smooth.chr21.cher21	Control	21	46077331	46077812	AML1.Control-6 smooth	1.20018	1.07309	KRTAP12-4	386684	ENSG00000212933	46074130	46074576	-1	protein_coding	keratin associated protein 12-4 [Source:HGNC Symbol;Acc:20532]
AML1.Control-6.smooth.chr21.cher22	Control	21	47874920	47875422	AML1.Control-6 smooth	1.46692	2.46444	DIP2A	23181	ENSG00000160305	47878812	47989926	1	protein_coding	DIP2 disco-interacting protein 2 homolog A (Drosophila) [Source:HGNC Symbol;Acc:17217]
AML1.Control-6.smooth.chr21.cher22	Control	21	47874920	47875422	AML1.Control-6 smooth	1.46692	2.46444	DIP2A-IT1	100862692	ENSG00000223692	47882384	47889219	1	sense_intronic	DIP2A intronic transcript 1 (non-protein coding) [Source:HGNC Symbol;Acc:41430]
AML1.Control-6.smooth.chr22.cher1	Control	22	17954466	17955056	AML1.Control-6 smooth	1.23968	1.33642	CECR2	27443	ENSG00000099954	17840837	18033845	1	protein_coding	cat eye syndrome chromosome region, candidate 2 [Source:HGNC Symbol;Acc:1840]
AML1.Control-6.smooth.chr22.cher3	Control	22	19134404	19134908	AML1.Control-6 smooth	1.57606	3.56121	DGCR14	23617	ENSG00000100056	19117792	19132197	-1	protein_coding	DiGeorge syndrome critical region gene 14 [Source:HGNC Symbol;Acc:16817]
AML1.Control-6.smooth.chr22.cher4	Control	22	19139080	19139580	AML1.Control-6 smooth	1.644	3.32297	DGCR14	23617	ENSG00000100056	19117792	19132197	-1	protein_coding	DiGeorge syndrome critical region gene 14 [Source:HGNC Symbol;Acc:16817]
AML1.Control-6.smooth.chr22.cher4	Control	22	19139080	19139580	AML1.Control-6 smooth	1.644	3.32297	GSC2	2928	ENSG00000063515	19136089	19137796	-1	protein_coding	goosecoid homeobox 2 [Source:HGNC Symbol;Acc:4613]
AML1.Control-6.smooth.chr22.cher5	Control	22	19440952	19441749	AML1.Control-6 smooth	1.3516	2.25273	HIRA	7290	ENSG00000100084	19318221	19435224	-1	protein_coding	HIR histone cell cycle regulation defective homolog A (S. cerevisiae) [Source:HGNC Symbol;Acc:4916]
AML1.Control-6.smooth.chr22.cher5	Control	22	19440952	19441749	AML1.Control-6 smooth	1.3516	2.25273	C22orf39	128977	ENSG00000242259	19338891	19435755	-1	protein_coding	chromosome 22 open reading frame 39 [Source:HGNC Symbol;Acc:27012]
AML1.Control-6.smooth.chr22.cher7	Control	22	21207401	21208008	AML1.Control-6 smooth	1.5364	2.96391	SNAP29	9342	ENSG00000099940	21213271	21245502	1	protein_coding	synaptosomal-associated protein, 29kDa [Source:HGNC Symbol;Acc:11133]
AML1.Control-6.smooth.chr22.cher8	Control	22	22094588	22095072	AML1.Control-6 smooth	1.22295	1.17366	YPEL1	29799	ENSG00000100027	22051833	22090123	-1	protein_coding	yippee-like 1 (Drosophila) [Source:HGNC Symbol;Acc:12845]
AML1.Control-6.smooth.chr22.cher9	Control	22	23096246	23096751	AML1.Control-6 smooth	1.16321	0.912922	IGLV3-15	NA	ENSG00000253786	23098043	23098286	1	IG_V_pseudogene	immunoglobulin lambda variable 3-15 (pseudogene) [Source:HGNC Symbol;Acc:5900]
AML1.Control-6.smooth.chr22.cher9	Control	22	23096246	23096751	AML1.Control-6 smooth	1.16321	0.912922	IGLV2-14	NA	ENSG00000211666	23101189	23101707	1	IG_V_gene	immunoglobulin lambda variable 2-14 [Source:HGNC Symbol;Acc:5888]
AML1.Control-6.smooth.chr22.cher9	Control	22	23096246	23096751	AML1.Control-6 smooth	1.16321	0.912922	D87015.1	NA	ENSG00000207835	23101185	23101279	1	miRNA
AML1.Control-6.smooth.chr22.cher10	Control	22	23228746	23229244	AML1.Control-6 smooth	1.39209	2.14233	IGLL5	100423062	ENSG00000254709	23229960	23238005	1	protein_coding	immunoglobulin lambda-like polypeptide 5 [Source:HGNC Symbol;Acc:38476]
AML1.Control-6.smooth.chr22.cher10	Control	22	23228746	23229244	AML1.Control-6 smooth	1.39209	2.14233	IGLJ1	NA	ENSG00000211674	23235872	23235998	1	IG_J_gene	immunoglobulin lambda joining 1 [Source:HGNC Symbol;Acc:5863]
AML1.Control-6.smooth.chr22.cher11	Control	22	24887838	24888632	AML1.Control-6 smooth	1.30331	1.91754	UPB1	51733	ENSG00000100024	24863206	24924358	1	protein_coding	ureidopropionase, beta [Source:HGNC Symbol;Acc:16297]
AML1.Control-6.smooth.chr22.cher11	Control	22	24887838	24888632	AML1.Control-6 smooth	1.30331	1.91754	C22orf45	646023	ENSG00000178803	24825178	24891042	-1	protein_coding	chromosome 22 open reading frame 45 [Source:HGNC Symbol;Acc:37122]
AML1.Control-6.smooth.chr22.cher12	Control	22	25589169	25589770	AML1.Control-6 smooth	1.01025	0.0707124	CRYBB3	1417	ENSG00000100053	25595817	25603330	1	protein_coding	crystallin, beta B3 [Source:HGNC Symbol;Acc:2400]
AML1.Control-6.smooth.chr22.cher14	Control	22	26872706	26874004	AML1.Control-6 smooth	1.67771	5.52441	HPS4	89781	ENSG00000100099	26839389	26879820	-1	protein_coding	Hermansky-Pudlak syndrome 4 [Source:HGNC Symbol;Acc:15844]
AML1.Control-6.smooth.chr22.cher14	Control	22	26872706	26874004	AML1.Control-6 smooth	1.67771	5.52441	SRRD	402055	ENSG00000100104	26879843	26887899	1	protein_coding	SRR1 domain containing [Source:HGNC Symbol;Acc:33910]
AML1.Control-6.smooth.chr22.cher15	Control	22	30208314	30209318	AML1.Control-6 smooth	1.20768	1.04447	ASCC2	84164	ENSG00000100325	30184597	30234271	-1	protein_coding	activating signal cointegrator 1 complex subunit 2 [Source:HGNC Symbol;Acc:24103]
AML1.Control-6.smooth.chr22.cher16	Control	22	30417346	30418061	AML1.Control-6 smooth	1.20529	0.615713	MTMR3	8897	ENSG00000100330	30279144	31521442	1	protein_coding	myotubularin related protein 3 [Source:HGNC Symbol;Acc:7451]
AML1.Control-6.smooth.chr22.cher17	Control	22	30746532	30747002	AML1.Control-6 smooth	1.18399	1.08338	SF3A1	10291	ENSG00000099995	30727979	30752936	-1	protein_coding	splicing factor 3a, subunit 1, 120kDa [Source:HGNC Symbol;Acc:10765]
AML1.Control-6.smooth.chr22.cher17	Control	22	30746532	30747002	AML1.Control-6 smooth	1.18399	1.08338	CCDC157	550631	ENSG00000187860	30752624	30774647	1	protein_coding	coiled-coil domain containing 157 [Source:HGNC Symbol;Acc:33854]
AML1.Control-6.smooth.chr22.cher18	Control	22	31320696	31321169	AML1.Control-6 smooth	1.28452	1.15512	MORC2-AS1	150291	ENSG00000235989	31318295	31328436	1	antisense	MORC2 antisense RNA 1 (non-protein coding) [Source:HGNC Symbol;Acc:26662]
AML1.Control-6.smooth.chr22.cher23	Control	22	32808486	32810380	AML1.Control-6 smooth	2.11002	11.7436	C22orf28	51493	ENSG00000100220	32783569	32808242	-1	protein_coding	chromosome 22 open reading frame 28 [Source:HGNC Symbol;Acc:26935]
AML1.Control-6.smooth.chr22.cher24	Control	22	36011915	36012489	AML1.Control-6 smooth	1.05272	0.507356	MB	4151	ENSG00000198125	36002811	36033998	-1	protein_coding	myoglobin [Source:HGNC Symbol;Acc:6915]
AML1.Control-6.smooth.chr22.cher26	Control	22	37103382	37103992	AML1.Control-6 smooth	1.16999	1.15279	CACNG2	10369	ENSG00000166862	36959968	37099603	-1	protein_coding	calcium channel, voltage-dependent, gamma subunit 2 [Source:HGNC Symbol;Acc:1406]
AML1.Control-6.smooth.chr22.cher27	Control	22	37174360	37176184	AML1.Control-6 smooth	1.92984	8.9077	IFT27	11020	ENSG00000100360	37154246	37172300	-1	protein_coding	intraflagellar transport 27 homolog (Chlamydomonas) [Source:HGNC Symbol;Acc:18626]
AML1.Control-6.smooth.chr22.cher28	Control	22	37644179	37644778	AML1.Control-6 smooth	1.12525	0.614751	RAC2	5880	ENSG00000128340	37621301	37640488	-1	protein_coding	ras-related C3 botulinum toxin substrate 2 (rho family, small GTP binding protein Rac2) [Source:HGNC Symbol;Acc:9802]
AML1.Control-6.smooth.chr22.cher29	Control	22	38250990	38251480	AML1.Control-6 smooth	1.32223	0.995844	EIF3L	51386	ENSG00000100129	38244875	38285414	1	protein_coding	eukaryotic translation initiation factor 3, subunit L [Source:HGNC Symbol;Acc:18138]
AML1.Control-6.smooth.chr22.cher31	Control	22	38353458	38353954	AML1.Control-6 smooth	1.15722	0.600831	C22orf23	84645	ENSG00000128346	38339528	38349676	-1	protein_coding	chromosome 22 open reading frame 23 [Source:HGNC Symbol;Acc:18589]
AML1.Control-6.smooth.chr22.cher33	Control	22	41847867	41848356	AML1.Control-6 smooth	1.31956	1.03512	TOB2	10766	ENSG00000183864	41829496	41843027	-1	protein_coding	transducer of ERBB2, 2 [Source:HGNC Symbol;Acc:11980]
AML1.Control-6.smooth.chr22.cher34	Control	22	42090486	42091870	AML1.Control-6 smooth	1.83976	9.35132	NHP2L1	4809	ENSG00000100138	42069934	42086508	-1	protein_coding	NHP2 non-histone chromosome protein 2-like 1 (S. cerevisiae) [Source:HGNC Symbol;Acc:7819]
AML1.Control-6.smooth.chr22.cher34	Control	22	42090486	42091870	AML1.Control-6 smooth	1.83976	9.35132	MEI1	150365	ENSG00000167077	42095503	42195460	1	protein_coding	meiosis inhibitor 1 [Source:HGNC Symbol;Acc:28613]
AML1.Control-6.smooth.chr22.cher34	Control	22	42090486	42091870	AML1.Control-6 smooth	1.83976	9.35132	Z83840.1	NA	ENSG00000255782	42090191	42092048	1	pseudogene
AML1.Control-6.smooth.chr22.cher35	Control	22	42946126	42946626	AML1.Control-6 smooth	1.28384	1.75614	SERHL2	253190	ENSG00000183569	42949623	42970388	1	protein_coding	serine hydrolase-like 2 [Source:HGNC Symbol;Acc:29446]
AML1.Control-6.smooth.chr22.cher36	Control	22	42981266	42981866	AML1.Control-6 smooth	1.24529	1.16904	RP1-222E13.10	91695	ENSG00000182841	42951229	42978044	-1	pseudogene
AML1.Control-6.smooth.chr22.cher37	Control	22	43356632	43357116	AML1.Control-6 smooth	1.10968	0.572621	PACSIN2	11252	ENSG00000100266	43231418	43411151	-1	protein_coding	protein kinase C and casein kinase substrate in neurons 2 [Source:HGNC Symbol;Acc:8571]
AML1.Control-6.smooth.chr22.cher39	Control	22	45149608	45150200	AML1.Control-6 smooth	1.25816	1.05345	ARHGAP8	553158	ENSG00000241484	45098355	45258665	1	protein_coding	Rho GTPase activating protein 8 [Source:HGNC Symbol;Acc:677]
AML1.Control-6.smooth.chr22.cher40	Control	22	46694690	46695294	AML1.Control-6 smooth	1.59883	1.91405	GTSE1	51512	ENSG00000075218	46692638	46726707	1	protein_coding	G-2 and S-phase expressed 1 [Source:HGNC Symbol;Acc:13698]
AML1.Control-6.smooth.chr22.cher41	Control	22	48531352	48532040	AML1.Control-6 smooth	1.42946	2.52158	LL22NC03-121E8.3	NA	ENSG00000229275	48537359	48539046	1	lincRNA
AML1.Control-6.smooth.chr22.cher42	Control	22	51040868	51041378	AML1.Control-6 smooth	1.0577	0.213059	CHKB	1120	ENSG00000100288	51017378	51039884	-1	protein_coding	choline kinase beta [Source:HGNC Symbol;Acc:1938]
AML1.Control-6.smooth.chr22.cher42	Control	22	51040868	51041378	AML1.Control-6 smooth	1.0577	0.213059	MAPK8IP2	23542	ENSG00000008735	51039114	51052409	1	protein_coding	mitogen-activated protein kinase 8 interacting protein 2 [Source:HGNC Symbol;Acc:6883]
AML1.Control-6.smooth.chr2.cher1	Control	2	267346	267934	AML1.Control-6 smooth	1.17604	1.0042	SH3YL1	26751	ENSG00000035115	217730	266398	-1	protein_coding	SH3 domain containing, Ysc84-like 1 (S. cerevisiae) [Source:HGNC Symbol;Acc:29546]
AML1.Control-6.smooth.chr2.cher1	Control	2	267346	267934	AML1.Control-6 smooth	1.17604	1.0042	ACP1	52	ENSG00000143727	264140	278283	1	protein_coding	acid phosphatase 1, soluble [Source:HGNC Symbol;Acc:122]
AML1.Control-6.smooth.chr2.cher2	Control	2	1414784	1415260	AML1.Control-6 smooth	1.34569	1.9888	TPO	7173	ENSG00000115705	1377995	1547483	1	protein_coding	thyroid peroxidase [Source:HGNC Symbol;Acc:12015]
AML1.Control-6.smooth.chr2.cher3	Control	2	3478328	3478811	AML1.Control-6 smooth	1.00272	0.140374	TRAPPC12	51112	ENSG00000171853	3383446	3488865	1	protein_coding	trafficking protein particle complex 12 [Source:HGNC Symbol;Acc:24284]
AML1.Control-6.smooth.chr2.cher4	Control	2	9345246	9345748	AML1.Control-6 smooth	1.2769	1.48887	ASAP2	8853	ENSG00000151693	9346894	9545812	1	protein_coding	ArfGAP with SH3 domain, ankyrin repeat and PH domain 2 [Source:HGNC Symbol;Acc:2721]
AML1.Control-6.smooth.chr2.cher5	Control	2	12850738	12852134	AML1.Control-6 smooth	1.50626	4.61843	RP11-333O1.1	NA	ENSG00000261117	12855541	12856353	1	lincRNA
AML1.Control-6.smooth.chr2.cher5	Control	2	12850738	12852134	AML1.Control-6 smooth	1.50626	4.61843	TRIB2	28951	ENSG00000071575	12857015	12882860	1	protein_coding	tribbles homolog 2 (Drosophila) [Source:HGNC Symbol;Acc:30809]
AML1.Control-6.smooth.chr2.cher6	Control	2	20255402	20256003	AML1.Control-6 smooth	1.02296	0.302116	LAPTM4A	9741	ENSG00000068697	20232411	20251789	-1	protein_coding	lysosomal protein transmembrane 4 alpha [Source:HGNC Symbol;Acc:6924]
AML1.Control-6.smooth.chr2.cher8	Control	2	27328792	27329401	AML1.Control-6 smooth	1.76548	5.01954	CGREF1	10669	ENSG00000138028	27321757	27341995	-1	protein_coding	cell growth regulator with EF-hand domain 1 [Source:HGNC Symbol;Acc:16962]
AML1.Control-6.smooth.chr2.cher9	Control	2	27506427	27507444	AML1.Control-6 smooth	1.26925	1.32495	TRIM54	57159	ENSG00000138100	27505260	27600344	1	protein_coding	tripartite motif containing 54 [Source:HGNC Symbol;Acc:16008]
AML1.Control-6.smooth.chr2.cher10	Control	2	27537236	27537718	AML1.Control-6 smooth	1.61188	2.36406	UCN	7349	ENSG00000163794	27530268	27531313	-1	protein_coding	urocortin [Source:HGNC Symbol;Acc:12516]
AML1.Control-6.smooth.chr2.cher10	Control	2	27537236	27537718	AML1.Control-6 smooth	1.61188	2.36406	MPV17	4358	ENSG00000115204	27532360	27548547	-1	protein_coding	MpV17 mitochondrial inner membrane protein [Source:HGNC Symbol;Acc:7224]
AML1.Control-6.smooth.chr2.cher11	Control	2	27594146	27594748	AML1.Control-6 smooth	1.44447	2.76459	EIF2B4	8890	ENSG00000115211	27587219	27593353	-1	protein_coding	eukaryotic translation initiation factor 2B, subunit 4 delta, 67kDa [Source:HGNC Symbol;Acc:3260]
AML1.Control-6.smooth.chr2.cher11	Control	2	27594146	27594748	AML1.Control-6 smooth	1.44447	2.76459	SNX17	9784	ENSG00000115234	27593389	27599995	1	protein_coding	sorting nexin 17 [Source:HGNC Symbol;Acc:14979]
AML1.Control-6.smooth.chr2.cher12	Control	2	28767820	28768320	AML1.Control-6 smooth	1.23153	1.13304	PLB1	151056	ENSG00000163803	28680012	28866654	1	protein_coding	phospholipase B1 [Source:HGNC Symbol;Acc:30041]
AML1.Control-6.smooth.chr2.cher13	Control	2	28783616	28784288	AML1.Control-6 smooth	1.23877	1.01044	PLB1	151056	ENSG00000163803	28680012	28866654	1	protein_coding	phospholipase B1 [Source:HGNC Symbol;Acc:30041]
AML1.Control-6.smooth.chr2.cher14	Control	2	30456438	30457318	AML1.Control-6 smooth	1.5854	4.89924	LBH	81606	ENSG00000213626	30454397	30546596	1	protein_coding	limb bud and heart development homolog (mouse) [Source:HGNC Symbol;Acc:29532]
AML1.Control-6.smooth.chr2.cher15	Control	2	37373383	37374009	AML1.Control-6 smooth	1.22188	0.917305	AC007899.3	NA	ENSG00000224891	37375673	37376447	1	pseudogene
AML1.Control-6.smooth.chr2.cher15	Control	2	37373383	37374009	AML1.Control-6 smooth	1.22188	0.917305	EIF2AK2	5610	ENSG00000055332	37326353	37384208	-1	protein_coding	eukaryotic translation initiation factor 2-alpha kinase 2 [Source:HGNC Symbol;Acc:9437]
AML1.Control-6.smooth.chr2.cher16	Control	2	37415140	37415614	AML1.Control-6 smooth	1.27127	1.47301	SULT6B1	391365	ENSG00000138068	37394963	37423741	-1	protein_coding	sulfotransferase family, cytosolic, 6B, member 1 [Source:HGNC Symbol;Acc:33433]
AML1.Control-6.smooth.chr2.cher17	Control	2	40677560	40678040	AML1.Control-6 smooth	1.15805	0.859194	SLC8A1	6546	ENSG00000183023	40339286	40838193	-1	protein_coding	solute carrier family 8 (sodium/calcium exchanger), member 1 [Source:HGNC Symbol;Acc:11068]
AML1.Control-6.smooth.chr2.cher18	Control	2	47177265	47177942	AML1.Control-6 smooth	1.44225	2.62735	TTC7A	57217	ENSG00000068724	47143296	47303276	1	protein_coding	tetratricopeptide repeat domain 7A [Source:HGNC Symbol;Acc:19750]
AML1.Control-6.smooth.chr2.cher19	Control	2	47795818	47796622	AML1.Control-6 smooth	1.49096	2.35118	KCNK12	56660	ENSG00000184261	47747910	47798078	-1	protein_coding	potassium channel, subfamily K, member 12 [Source:HGNC Symbol;Acc:6274]
AML1.Control-6.smooth.chr2.cher20	Control	2	49380816	49381488	AML1.Control-6 smooth	1.26432	2.00691	FSHR	2492	ENSG00000170820	49189296	49381676	-1	protein_coding	follicle stimulating hormone receptor [Source:HGNC Symbol;Acc:3969]
AML1.Control-6.smooth.chr2.cher24	Control	2	55747484	55747964	AML1.Control-6 smooth	1.10686	0.686605	CCDC104	112942	ENSG00000163001	55746740	55773015	1	protein_coding	coiled-coil domain containing 104 [Source:HGNC Symbol;Acc:30540]
AML1.Control-6.smooth.chr2.cher25	Control	2	56213351	56213850	AML1.Control-6 smooth	1.11359	0.705468	MIR217	406999	ENSG00000207548	56210102	56210211	-1	miRNA	microRNA 217 [Source:HGNC Symbol;Acc:31594]
AML1.Control-6.smooth.chr2.cher26	Control	2	58134914	58135738	AML1.Control-6 smooth	1.30728	2.23113	VRK2	101927261	ENSG00000028116	58134786	58387055	1	protein_coding	vaccinia related kinase 2 [Source:HGNC Symbol;Acc:12719]
AML1.Control-6.smooth.chr2.cher27	Control	2	61763702	61764196	AML1.Control-6 smooth	1.26742	1.58643	XPO1	7514	ENSG00000082898	61704984	61765761	-1	protein_coding	exportin 1 (CRM1 homolog, yeast) [Source:HGNC Symbol;Acc:12825]
AML1.Control-6.smooth.chr2.cher28	Control	2	63671415	63671917	AML1.Control-6 smooth	1.29381	1.43488	WDPCP	51057	ENSG00000143951	63348518	64054977	-1	protein_coding	WD repeat containing planar cell polarity effector [Source:HGNC Symbol;Acc:28027]
AML1.Control-6.smooth.chr2.cher29	Control	2	64884049	64884581	AML1.Control-6 smooth	1.2025	1.31778	SERTAD2	9792	ENSG00000179833	64858755	64977449	-1	protein_coding	SERTA domain containing 2 [Source:HGNC Symbol;Acc:30784]
AML1.Control-6.smooth.chr2.cher30	Control	2	69001066	69001572	AML1.Control-6 smooth	1.28845	1.33275	ARHGAP25	9938	ENSG00000163219	68906733	69053965	1	protein_coding	Rho GTPase activating protein 25 [Source:HGNC Symbol;Acc:28951]
AML1.Control-6.smooth.chr2.cher31	Control	2	69098062	69098734	AML1.Control-6 smooth	1.36026	2.35333	BMP10	27302	ENSG00000163217	69092613	69098649	-1	protein_coding	bone morphogenetic protein 10 [Source:HGNC Symbol;Acc:20869]
AML1.Control-6.smooth.chr2.cher32	Control	2	69237839	69238622	AML1.Control-6 smooth	1.79405	5.34105	ANTXR1	84168	ENSG00000169604	69240310	69476459	1	protein_coding	anthrax toxin receptor 1 [Source:HGNC Symbol;Acc:21014]
AML1.Control-6.smooth.chr2.cher34	Control	2	74650970	74651690	AML1.Control-6 smooth	1.16131	1.14495	HMGA1P8	NA	ENSG00000233155	74645249	74645569	-1	pseudogene	high mobility group AT-hook 1 pseudogene 8 [Source:HGNC Symbol;Acc:39183]
AML1.Control-6.smooth.chr2.cher34	Control	2	74650970	74651690	AML1.Control-6 smooth	1.16131	1.14495	C2orf81	388963	ENSG00000159239	74641304	74648718	-1	protein_coding	chromosome 2 open reading frame 81 [Source:HGNC Symbol;Acc:34350]
AML1.Control-6.smooth.chr2.cher34	Control	2	74650970	74651690	AML1.Control-6 smooth	1.16131	1.14495	WDR54	84058	ENSG00000005448	74648805	74652882	1	protein_coding	WD repeat domain 54 [Source:HGNC Symbol;Acc:25770]
AML1.Control-6.smooth.chr2.cher35	Control	2	85130320	85130789	AML1.Control-6 smooth	1.30961	1.73336	TMSB10	9168	ENSG00000034510	85132749	85133795	1	protein_coding	thymosin beta 10 [Source:HGNC Symbol;Acc:11879]
AML1.Control-6.smooth.chr2.cher36	Control	2	85582670	85583546	AML1.Control-6 smooth	1.5846	4.40832	RETSAT	54884	ENSG00000042445	85569211	85581743	-1	protein_coding	retinol saturase (all-trans-retinol 13,14-reductase) [Source:HGNC Symbol;Acc:25991]
AML1.Control-6.smooth.chr2.cher36	Control	2	85582670	85583546	AML1.Control-6 smooth	1.5846	4.40832	ELMOD3	84173	ENSG00000115459	85581517	85618875	1	protein_coding	ELMO/CED-12 domain containing 3 [Source:HGNC Symbol;Acc:26158]
AML1.Control-6.smooth.chr2.cher37	Control	2	85821494	85822060	AML1.Control-6 smooth	1.29938	1.5192	RNF181	51255	ENSG00000168894	85822848	85824736	1	protein_coding	ring finger protein 181 [Source:HGNC Symbol;Acc:28037]
AML1.Control-6.smooth.chr2.cher38	Control	2	86070240	86071036	AML1.Control-6 smooth	1.39388	2.75834	ST3GAL5	8869	ENSG00000115525	86066267	86116137	-1	protein_coding	ST3 beta-galactoside alpha-2,3-sialyltransferase 5 [Source:HGNC Symbol;Acc:10872]
AML1.Control-6.smooth.chr2.cher39	Control	2	86269806	86270294	AML1.Control-6 smooth	1.41063	2.16206	POLR1A	25885	ENSG00000068654	86247339	86333278	-1	protein_coding	polymerase (RNA) I polypeptide A, 194kDa [Source:HGNC Symbol;Acc:17264]
AML1.Control-6.smooth.chr2.cher40	Control	2	86565970	86566866	AML1.Control-6 smooth	1.34644	2.25438	REEP1	65055	ENSG00000068615	86441116	86565206	-1	protein_coding	receptor accessory protein 1 [Source:HGNC Symbol;Acc:25786]
AML1.Control-6.smooth.chr2.cher41	Control	2	86663496	86663980	AML1.Control-6 smooth	1.17386	1.13482	KDM3A	55818	ENSG00000115548	86667770	86719839	1	protein_coding	lysine (K)-specific demethylase 3A [Source:HGNC Symbol;Acc:20815]
AML1.Control-6.smooth.chr2.cher42	Control	2	88357300	88357784	AML1.Control-6 smooth	1.02358	0.259162	KRCC1	51315	ENSG00000172086	88326724	88355248	-1	protein_coding	lysine-rich coiled-coil 1 [Source:HGNC Symbol;Acc:28039]
AML1.Control-6.smooth.chr2.cher43	Control	2	95694444	95695135	AML1.Control-6 smooth	1.1265	1.04413	AC103563.8	NA	ENSG00000233850	95690938	95692454	-1	antisense
AML1.Control-6.smooth.chr2.cher44	Control	2	96900128	96900620	AML1.Control-6 smooth	1.24573	1.27118	AC012307.3	285033	ENSG00000204685	96874154	96908359	1	processed_transcript
AML1.Control-6.smooth.chr2.cher45	Control	2	98701088	98701874	AML1.Control-6 smooth	1.29322	1.89416	VWA3B	200403	ENSG00000168658	98703579	98929762	1	protein_coding	von Willebrand factor A domain containing 3B [Source:HGNC Symbol;Acc:28385]
AML1.Control-6.smooth.chr2.cher46	Control	2	99133150	99134253	AML1.Control-6 smooth	1.29052	2.69792	INPP4A	3631	ENSG00000040933	99061317	99207496	1	protein_coding	inositol polyphosphate-4-phosphatase, type I, 107kDa [Source:HGNC Symbol;Acc:6074]
AML1.Control-6.smooth.chr2.cher47	Control	2	99222008	99222484	AML1.Control-6 smooth	1.14233	0.903064	COA5	493753	ENSG00000183513	99215773	99224978	-1	protein_coding	cytochrome C oxidase assembly factor 5 [Source:HGNC Symbol;Acc:33848]
AML1.Control-6.smooth.chr2.cher47	Control	2	99222008	99222484	AML1.Control-6 smooth	1.14233	0.903064	UNC50	25972	ENSG00000115446	99225042	99234978	1	protein_coding	unc-50 homolog (C. elegans) [Source:HGNC Symbol;Acc:16046]
AML1.Control-6.smooth.chr2.cher48	Control	2	109154200	109154732	AML1.Control-6 smooth	1.2609	1.54473	AC012487.2	NA	ENSG00000214184	109123971	109150652	-1	antisense
AML1.Control-6.smooth.chr2.cher49	Control	2	113595686	113596202	AML1.Control-6 smooth	1.4327	2.72028	IL1B	3553	ENSG00000125538	113587328	113594480	-1	protein_coding	interleukin 1, beta [Source:HGNC Symbol;Acc:5992]
AML1.Control-6.smooth.chr2.cher49	Control	2	113595686	113596202	AML1.Control-6 smooth	1.4327	2.72028	AC079753.1	NA	ENSG00000221541	113601888	113601988	1	miRNA
AML1.Control-6.smooth.chr2.cher50	Control	2	113599978	113600480	AML1.Control-6 smooth	1.30994	1.7062	IL1B	3553	ENSG00000125538	113587328	113594480	-1	protein_coding	interleukin 1, beta [Source:HGNC Symbol;Acc:5992]
AML1.Control-6.smooth.chr2.cher50	Control	2	113599978	113600480	AML1.Control-6 smooth	1.30994	1.7062	AC079753.1	NA	ENSG00000221541	113601888	113601988	1	miRNA
AML1.Control-6.smooth.chr2.cher51	Control	2	113822894	113823592	AML1.Control-6 smooth	1.42228	2.07657	IL1F10	84639	ENSG00000136697	113825547	113833427	1	protein_coding	interleukin 1 family, member 10 (theta) [Source:HGNC Symbol;Acc:15552]
AML1.Control-6.smooth.chr2.cher52	Control	2	115201046	115201538	AML1.Control-6 smooth	1.15281	1.00159	DPP10	57628	ENSG00000175497	115199876	116603328	1	protein_coding	dipeptidyl-peptidase 10 (non-functional) [Source:HGNC Symbol;Acc:20823]
AML1.Control-6.smooth.chr2.cher55	Control	2	119696168	119696804	AML1.Control-6 smooth	1.06811	0.521253	MARCO	8685	ENSG00000019169	119699742	119752236	1	protein_coding	macrophage receptor with collagenous structure [Source:HGNC Symbol;Acc:6895]
AML1.Control-6.smooth.chr2.cher56	Control	2	120510940	120511549	AML1.Control-6 smooth	1.28206	1.40537	PTPN4	5775	ENSG00000088179	120517207	120741394	1	protein_coding	protein tyrosine phosphatase, non-receptor type 4 (megakaryocyte) [Source:HGNC Symbol;Acc:9656]
AML1.Control-6.smooth.chr2.cher57	Control	2	128617858	128618444	AML1.Control-6 smooth	1.90259	5.6028	POLR2D	5433	ENSG00000144231	128603896	128615731	-1	protein_coding	polymerase (RNA) II (DNA directed) polypeptide D [Source:HGNC Symbol;Acc:9191]
AML1.Control-6.smooth.chr2.cher58	Control	2	145271354	145271868	AML1.Control-6 smooth	1.08393	0.524704	ZEB2-AS1	100303491	ENSG00000238057	145275982	145278683	1	antisense	ZEB2 antisense RNA 1 (non-protein coding) [Source:HGNC Symbol;Acc:37149]
AML1.Control-6.smooth.chr2.cher58	Control	2	145271354	145271868	AML1.Control-6 smooth	1.08393	0.524704	ZEB2	9839	ENSG00000169554	145121063	145282147	-1	protein_coding	zinc finger E-box binding homeobox 2 [Source:HGNC Symbol;Acc:14881]
AML1.Control-6.smooth.chr2.cher59	Control	2	149889804	149890306	AML1.Control-6 smooth	1.20006	0.836992	LYPD6B	130576	ENSG00000150556	149894621	150071776	1	protein_coding	LY6/PLAUR domain containing 6B [Source:HGNC Symbol;Acc:27018]
AML1.Control-6.smooth.chr2.cher63	Control	2	163172420	163172915	AML1.Control-6 smooth	1.05497	0.440184	GCA	25801	ENSG00000115271	163175350	163228105	1	protein_coding	grancalcin, EF-hand calcium binding protein [Source:HGNC Symbol;Acc:15990]
AML1.Control-6.smooth.chr2.cher63	Control	2	163172420	163172915	AML1.Control-6 smooth	1.05497	0.440184	IFIH1	64135	ENSG00000115267	163123589	163175213	-1	protein_coding	interferon induced with helicase C domain 1 [Source:HGNC Symbol;Acc:18873]
AML1.Control-6.smooth.chr2.cher64	Control	2	171032411	171032908	AML1.Control-6 smooth	1.03392	0.300378	MYO3B	140469	ENSG00000071909	171034655	171511662	1	protein_coding	myosin IIIB [Source:HGNC Symbol;Acc:15576]
AML1.Control-6.smooth.chr2.cher65	Control	2	173598462	173599246	AML1.Control-6 smooth	1.21608	1.39831	RAPGEF4	11069	ENSG00000091428	173600002	173917621	1	protein_coding	Rap guanine nucleotide exchange factor (GEF) 4 [Source:HGNC Symbol;Acc:16626]
AML1.Control-6.smooth.chr2.cher65	Control	2	173598462	173599246	AML1.Control-6 smooth	1.21608	1.39831	AC018712.3	91149	ENSG00000228016	173541869	173600934	-1	lincRNA
AML1.Control-6.smooth.chr2.cher66	Control	2	174830686	174831188	AML1.Control-6 smooth	1.25891	1.5534	SP3	6670	ENSG00000172845	174771187	174830430	-1	protein_coding	Sp3 transcription factor [Source:HGNC Symbol;Acc:11208]
AML1.Control-6.smooth.chr2.cher67	Control	2	174834774	174835656	AML1.Control-6 smooth	1.34561	2.28053	SP3	6670	ENSG00000172845	174771187	174830430	-1	protein_coding	Sp3 transcription factor [Source:HGNC Symbol;Acc:11208]
AML1.Control-6.smooth.chr2.cher68	Control	2	183939326	183940230	AML1.Control-6 smooth	1.17347	1.38773	KRT8P10	NA	ENSG00000231203	183935768	183937214	-1	pseudogene	keratin 8 pseudogene 10 [Source:HGNC Symbol;Acc:33364]
AML1.Control-6.smooth.chr2.cher68	Control	2	183939326	183940230	AML1.Control-6 smooth	1.17347	1.38773	DUSP19	142679	ENSG00000162999	183943287	183964733	1	protein_coding	dual specificity phosphatase 19 [Source:HGNC Symbol;Acc:18894]
AML1.Control-6.smooth.chr2.cher69	Control	2	190449206	190449716	AML1.Control-6 smooth	1.61844	3.39345	SLC40A1	30061	ENSG00000138449	190425305	190448484	-1	protein_coding	solute carrier family 40 (iron-regulated transporter), member 1 [Source:HGNC Symbol;Acc:10909]
AML1.Control-6.smooth.chr2.cher70	Control	2	190537351	190538162	AML1.Control-6 smooth	1.50599	3.49934	ANKAR	150709	ENSG00000151687	190539016	190625919	1	protein_coding	ankyrin and armadillo repeat containing [Source:HGNC Symbol;Acc:26350]
AML1.Control-6.smooth.chr2.cher71	Control	2	201388408	201389007	AML1.Control-6 smooth	1.20249	0.813559	KCTD18	130535	ENSG00000155729	201353675	201384507	-1	protein_coding	potassium channel tetramerisation domain containing 18 [Source:HGNC Symbol;Acc:26446]
AML1.Control-6.smooth.chr2.cher71	Control	2	201388408	201389007	AML1.Control-6 smooth	1.20249	0.813559	SGOL2	151246	ENSG00000163535	201374731	201448505	1	protein_coding	shugoshin-like 2 (S. pombe) [Source:HGNC Symbol;Acc:30812]
AML1.Control-6.smooth.chr2.cher72	Control	2	207085656	207086274	AML1.Control-6 smooth	1.30194	1.32098	GPR1	2825	ENSG00000183671	207040040	207082771	-1	protein_coding	G protein-coupled receptor 1 [Source:HGNC Symbol;Acc:4463]
AML1.Control-6.smooth.chr2.cher72	Control	2	207085656	207086274	AML1.Control-6 smooth	1.30194	1.32098	7SK	NA	ENSG00000222496	207086039	207086358	1	misc_RNA	7SK RNA [Source:RFAM;Acc:RF00100]
AML1.Control-6.smooth.chr2.cher73	Control	2	207627154	207627768	AML1.Control-6 smooth	1.24681	1.75013	FASTKD2	22868	ENSG00000118246	207630081	207657233	1	protein_coding	FAST kinase domains 2 [Source:HGNC Symbol;Acc:29160]
AML1.Control-6.smooth.chr2.cher73	Control	2	207627154	207627768	AML1.Control-6 smooth	1.24681	1.75013	MDH1B	130752	ENSG00000138400	207602487	207630271	-1	protein_coding	malate dehydrogenase 1B, NAD (soluble) [Source:HGNC Symbol;Acc:17836]
AML1.Control-6.smooth.chr2.cher74	Control	2	208391714	208392830	AML1.Control-6 smooth	1.44833	3.63333	CREB1	1385	ENSG00000118260	208394461	208468155	1	protein_coding	cAMP responsive element binding protein 1 [Source:HGNC Symbol;Acc:2345]
AML1.Control-6.smooth.chr2.cher74	Control	2	208391714	208392830	AML1.Control-6 smooth	1.44833	3.63333	AC007879.5	101927887	ENSG00000223725	208104588	208394519	-1	antisense
AML1.Control-6.smooth.chr2.cher75	Control	2	218894643	218895140	AML1.Control-6 smooth	1.11668	0.824172	RUFY4	285180	ENSG00000188282	218899683	218955304	1	protein_coding	RUN and FYVE domain containing 4 [Source:HGNC Symbol;Acc:24804]
AML1.Control-6.smooth.chr2.cher76	Control	2	219746315	219747040	AML1.Control-6 smooth	1.38939	2.07191	WNT10A	80326	ENSG00000135925	219745085	219764303	1	protein_coding	wingless-type MMTV integration site family, member 10A [Source:HGNC Symbol;Acc:13829]
AML1.Control-6.smooth.chr2.cher77	Control	2	219825812	219826422	AML1.Control-6 smooth	1.70535	4.47286	AC097468.7	NA	ENSG00000235024	219809351	219826625	-1	processed_transcript
AML1.Control-6.smooth.chr2.cher77	Control	2	219825812	219826422	AML1.Control-6 smooth	1.70535	4.47286	CDK5R2	8941	ENSG00000171450	219824377	219826876	1	protein_coding	cyclin-dependent kinase 5, regulatory subunit 2 (p39) [Source:HGNC Symbol;Acc:1776]
AML1.Control-6.smooth.chr2.cher78	Control	2	220047992	220048602	AML1.Control-6 smooth	1.65952	3.52089	CNPPD1	27013	ENSG00000115649	220036619	220042828	-1	protein_coding	cyclin Pas1/PHO80 domain containing 1 [Source:HGNC Symbol;Acc:25220]
AML1.Control-6.smooth.chr2.cher78	Control	2	220047992	220048602	AML1.Control-6 smooth	1.65952	3.52089	FAM134A	79137	ENSG00000144567	220040947	220050201	1	protein_coding	family with sequence similarity 134, member A [Source:HGNC Symbol;Acc:28450]
AML1.Control-6.smooth.chr2.cher79	Control	2	220412956	220413730	AML1.Control-6 smooth	2.04192	7.27771	CHPF	79586	ENSG00000123989	220403669	220408509	-1	protein_coding	chondroitin polymerizing factor [Source:HGNC Symbol;Acc:24291]
AML1.Control-6.smooth.chr2.cher80	Control	2	220474530	220475050	AML1.Control-6 smooth	1.47303	1.97227	STK11IP	114790	ENSG00000144589	220462582	220481173	1	protein_coding	serine/threonine kinase 11 interacting protein [Source:HGNC Symbol;Acc:19184]
AML1.Control-6.smooth.chr2.cher81	Control	2	222290396	222290977	AML1.Control-6 smooth	1.13353	0.923358	EPHA4	2043	ENSG00000116106	222282747	222438922	-1	protein_coding	EPH receptor A4 [Source:HGNC Symbol;Acc:3388]
AML1.Control-6.smooth.chr2.cher82	Control	2	228243239	228244444	AML1.Control-6 smooth	1.43367	3.61604	TM4SF20	79853	ENSG00000168955	228226872	228246711	-1	protein_coding	transmembrane 4 L six family member 20 [Source:HGNC Symbol;Acc:26230]
AML1.Control-6.smooth.chr2.cher83	Control	2	230098531	230099026	AML1.Control-6 smooth	1.06592	0.455123	PID1	55022	ENSG00000153823	229715242	230136001	-1	protein_coding	phosphotyrosine interaction domain containing 1 [Source:HGNC Symbol;Acc:26084]
AML1.Control-6.smooth.chr2.cher84	Control	2	234639180	234639784	AML1.Control-6 smooth	1.19086	0.932364	UGT1A3	54659	ENSG00000243135	234637754	234681945	1	protein_coding	UDP glucuronosyltransferase 1 family, polypeptide A3 [Source:HGNC Symbol;Acc:12535]
AML1.Control-6.smooth.chr2.cher86	Control	2	234819672	234820583	AML1.Control-6 smooth	1.64162	4.02098	TRPM8	79054	ENSG00000144481	234826043	234928166	1	protein_coding	transient receptor potential cation channel, subfamily M, member 8 [Source:HGNC Symbol;Acc:17961]
AML1.Control-6.smooth.chr2.cher88	Control	2	236812942	236813444	AML1.Control-6 smooth	1.08959	0.648704	AGAP1	116987	ENSG00000157985	236402733	237035198	1	protein_coding	ArfGAP with GTPase domain, ankyrin repeat and PH domain 1 [Source:HGNC Symbol;Acc:16922]
AML1.Control-6.smooth.chr3.cher1	Control	3	3079654	3080364	AML1.Control-6 smooth	1.21718	1.27119	CNTN4	152330	ENSG00000144619	2140497	3099645	1	protein_coding	contactin 4 [Source:HGNC Symbol;Acc:2174]
AML1.Control-6.smooth.chr3.cher2	Control	3	3151097	3151690	AML1.Control-6 smooth	1.16301	0.806952	IL5RA	3568	ENSG00000091181	3111233	3168297	-1	protein_coding	interleukin 5 receptor, alpha [Source:HGNC Symbol;Acc:6017]
AML1.Control-6.smooth.chr3.cher3	Control	3	3166998	3167580	AML1.Control-6 smooth	1.17572	0.797324	TRNT1	51095	ENSG00000072756	3168600	3192563	1	protein_coding	tRNA nucleotidyl transferase, CCA-adding, 1 [Source:HGNC Symbol;Acc:17341]
AML1.Control-6.smooth.chr3.cher3	Control	3	3166998	3167580	AML1.Control-6 smooth	1.17572	0.797324	IL5RA	3568	ENSG00000091181	3111233	3168297	-1	protein_coding	interleukin 5 receptor, alpha [Source:HGNC Symbol;Acc:6017]
AML1.Control-6.smooth.chr3.cher4	Control	3	5223716	5224286	AML1.Control-6 smooth	1.12924	0.999955	EDEM1	9695	ENSG00000134109	5229331	5261642	1	protein_coding	ER degradation enhancer, mannosidase alpha-like 1 [Source:HGNC Symbol;Acc:18967]
AML1.Control-6.smooth.chr3.cher5	Control	3	11615862	11616542	AML1.Control-6 smooth	1.14642	1.02264	VGLL4	9686	ENSG00000144560	11597544	11762220	-1	protein_coding	vestigial like 4 (Drosophila) [Source:HGNC Symbol;Acc:28966]
AML1.Control-6.smooth.chr3.cher6	Control	3	13923154	13923664	AML1.Control-6 smooth	1.20808	1.34119	WNT7A	7476	ENSG00000154764	13857755	13921618	-1	protein_coding	wingless-type MMTV integration site family, member 7A [Source:HGNC Symbol;Acc:12786]
AML1.Control-6.smooth.chr3.cher7	Control	3	15843508	15844012	AML1.Control-6 smooth	1.1048	0.586104	ANKRD28	23243	ENSG00000206560	15708743	15901278	-1	protein_coding	ankyrin repeat domain 28 [Source:HGNC Symbol;Acc:29024]
AML1.Control-6.smooth.chr3.cher8	Control	3	23848874	23849792	AML1.Control-6 smooth	1.68338	5.79084	UBE2E1	7324	ENSG00000170142	23847394	23932807	1	protein_coding	ubiquitin-conjugating enzyme E2E 1 [Source:HGNC Symbol;Acc:12477]
AML1.Control-6.smooth.chr3.cher8	Control	3	23848874	23849792	AML1.Control-6 smooth	1.68338	5.79084	UBE2E1-AS1	NA	ENSG00000223791	23845515	23848396	-1	antisense	UBE2E1 antisense RNA 1 (non-protein coding) [Source:HGNC Symbol;Acc:40598]
AML1.Control-6.smooth.chr3.cher9	Control	3	25823482	25824008	AML1.Control-6 smooth	1.28381	1.66852	NGLY1	55768	ENSG00000151092	25760435	25831530	-1	protein_coding	N-glycanase 1 [Source:HGNC Symbol;Acc:17646]
AML1.Control-6.smooth.chr3.cher9	Control	3	25823482	25824008	AML1.Control-6 smooth	1.28381	1.66852	OXSM	54995	ENSG00000151093	25824408	25836025	1	protein_coding	3-oxoacyl-ACP synthase, mitochondrial [Source:HGNC Symbol;Acc:26063]
AML1.Control-6.smooth.chr3.cher10	Control	3	28283862	28284448	AML1.Control-6 smooth	1.21657	1.1682	CMC1	152100	ENSG00000187118	28283075	28366633	1	protein_coding	COX assembly mitochondrial protein 1 homolog (S. cerevisiae) [Source:HGNC Symbol;Acc:28783]
AML1.Control-6.smooth.chr3.cher11	Control	3	29322023	29322788	AML1.Control-6 smooth	1.74436	3.62368	RBMS3	27303	ENSG00000144642	29322473	30051886	1	protein_coding	RNA binding motif, single stranded interacting protein 3 [Source:HGNC Symbol;Acc:13427]
AML1.Control-6.smooth.chr3.cher12	Control	3	32728331	32728857	AML1.Control-6 smooth	1.33052	1.60419	CNOT10	25904	ENSG00000182973	32726637	32815367	1	protein_coding	CCR4-NOT transcription complex, subunit 10 [Source:HGNC Symbol;Acc:23817]
AML1.Control-6.smooth.chr3.cher13	Control	3	33319890	33320584	AML1.Control-6 smooth	1.05276	0.203552	FBXL2	25827	ENSG00000153558	33318517	33445154	1	protein_coding	F-box and leucine-rich repeat protein 2 [Source:HGNC Symbol;Acc:13598]
AML1.Control-6.smooth.chr3.cher14	Control	3	38390598	38391068	AML1.Control-6 smooth	1.78367	3.49803	XYLB	9942	ENSG00000093217	38388251	38462839	1	protein_coding	xylulokinase homolog (H. influenzae) [Source:HGNC Symbol;Acc:12839]
AML1.Control-6.smooth.chr3.cher15	Control	3	38532186	38533590	AML1.Control-6 smooth	1.53173	3.92934	EXOG	9941	ENSG00000157036	38537618	38583652	1	protein_coding	endo/exonuclease (5'-3'), endonuclease G-like [Source:HGNC Symbol;Acc:3347]
AML1.Control-6.smooth.chr3.cher18	Control	3	42638162	42638752	AML1.Control-6 smooth	1.08126	0.560793	NKTR	4820	ENSG00000114857	42642106	42690227	1	protein_coding	natural killer-tumor recognition sequence [Source:HGNC Symbol;Acc:7833]
AML1.Control-6.smooth.chr3.cher19	Control	3	43151300	43151964	AML1.Control-6 smooth	1.18154	1.02925	C3orf39	84892	ENSG00000144647	43120724	43147568	-1	protein_coding	chromosome 3 open reading frame 39 [Source:HGNC Symbol;Acc:25902]
AML1.Control-6.smooth.chr3.cher20	Control	3	45886422	45886850	AML1.Control-6 smooth	1.18283	1.02239	LZTFL1	54585	ENSG00000163818	45864808	45957534	-1	protein_coding	leucine zipper transcription factor-like 1 [Source:HGNC Symbol;Acc:6741]
AML1.Control-6.smooth.chr3.cher21	Control	3	46398451	46399346	AML1.Control-6 smooth	1.38712	2.90128	CCR2	729230	ENSG00000121807	46395225	46402419	1	protein_coding	chemokine (C-C motif) receptor 2 [Source:HGNC Symbol;Acc:1603]
AML1.Control-6.smooth.chr3.cher22	Control	3	46400242	46400686	AML1.Control-6 smooth	1.33175	1.09034	CCR2	729230	ENSG00000121807	46395225	46402419	1	protein_coding	chemokine (C-C motif) receptor 2 [Source:HGNC Symbol;Acc:1603]
AML1.Control-6.smooth.chr3.cher23	Control	3	46445006	46445649	AML1.Control-6 smooth	1.42766	2.36019	RP11-24F11.5	NA	ENSG00000240310	46451005	46454488	1	processed_transcript
AML1.Control-6.smooth.chr3.cher23	Control	3	46445006	46445649	AML1.Control-6 smooth	1.42766	2.36019	CCRL2	9034	ENSG00000121797	46448654	46451014	1	protein_coding	chemokine (C-C motif) receptor-like 2 [Source:HGNC Symbol;Acc:1612]
AML1.Control-6.smooth.chr3.cher23	Control	3	46445006	46445649	AML1.Control-6 smooth	1.42766	2.36019	RP11-24F11.2	NA	ENSG00000223552	46406446	46448550	-1	antisense
AML1.Control-6.smooth.chr3.cher24	Control	3	46879220	46879928	AML1.Control-6 smooth	1.65562	4.21993	PRSS42	339906	ENSG00000178055	46871032	46875585	-1	protein_coding	protease, serine, 42 [Source:HGNC Symbol;Acc:30716]
AML1.Control-6.smooth.chr3.cher25	Control	3	48231852	48232428	AML1.Control-6 smooth	2.01807	6.09178	CDC25A	993	ENSG00000164045	48198636	48229892	-1	protein_coding	cell division cycle 25 homolog A (S. pombe) [Source:HGNC Symbol;Acc:1725]
AML1.Control-6.smooth.chr3.cher26	Control	3	49379446	49380046	AML1.Control-6 smooth	1.86919	5.70301	USP4	7375	ENSG00000114316	49315264	49378145	-1	protein_coding	ubiquitin specific peptidase 4 (proto-oncogene) [Source:HGNC Symbol;Acc:12627]
AML1.Control-6.smooth.chr3.cher27	Control	3	51738986	51739516	AML1.Control-6 smooth	1.17912	0.94498	GRM2	2912	ENSG00000164082	51741086	51752629	1	protein_coding	glutamate receptor, metabotropic 2 [Source:HGNC Symbol;Acc:4594]
AML1.Control-6.smooth.chr3.cher28	Control	3	52030920	52031510	AML1.Control-6 smooth	1.29672	1.51504	RPL29	6159	ENSG00000162244	52027644	52029958	-1	protein_coding	ribosomal protein L29 [Source:HGNC Symbol;Acc:10331]
AML1.Control-6.smooth.chr3.cher29	Control	3	52274548	52275132	AML1.Control-6 smooth	1.56664	2.89873	TWF2	11344	ENSG00000247596	52262626	52273177	-1	protein_coding	twinfilin, actin-binding protein, homolog 2 (Drosophila) [Source:HGNC Symbol;Acc:9621]
AML1.Control-6.smooth.chr3.cher29	Control	3	52274548	52275132	AML1.Control-6 smooth	1.56664	2.89873	PPM1M	132160	ENSG00000164088	52279841	52284613	1	protein_coding	protein phosphatase, Mg2+/Mn2+ dependent, 1M [Source:HGNC Symbol;Acc:26506]
AML1.Control-6.smooth.chr3.cher29	Control	3	52274548	52275132	AML1.Control-6 smooth	1.56664	2.89873	RP5-1157M23.2	101929029	ENSG00000243224	52273274	52275113	1	lincRNA
AML1.Control-6.smooth.chr3.cher30	Control	3	53530536	53531306	AML1.Control-6 smooth	1.50704	3.15657	CACNA1D	776	ENSG00000157388	53528683	53846490	1	protein_coding	calcium channel, voltage-dependent, L type, alpha 1D subunit [Source:HGNC Symbol;Acc:1391]
AML1.Control-6.smooth.chr3.cher31	Control	3	56502992	56503490	AML1.Control-6 smooth	1.67806	2.38966	ERC2	26059	ENSG00000187672	55542336	56502391	-1	protein_coding	ELKS/RAB6-interacting/CAST family member 2 [Source:HGNC Symbol;Acc:31922]
AML1.Control-6.smooth.chr3.cher32	Control	3	57239378	57239862	AML1.Control-6 smooth	1.74472	4.0845	HESX1	8820	ENSG00000163666	57231944	57260549	-1	protein_coding	HESX homeobox 1 [Source:HGNC Symbol;Acc:4877]
AML1.Control-6.smooth.chr3.cher33	Control	3	58061130	58061808	AML1.Control-6 smooth	1.28437	0.914713	FLNB	2317	ENSG00000136068	57994127	58157982	1	protein_coding	filamin B, beta [Source:HGNC Symbol;Acc:3755]
AML1.Control-6.smooth.chr3.cher34	Control	3	73040408	73041128	AML1.Control-6 smooth	1.10876	0.680394	PPP4R2	151987	ENSG00000163605	73045936	73118350	1	protein_coding	protein phosphatase 4, regulatory subunit 2 [Source:HGNC Symbol;Acc:18296]
AML1.Control-6.smooth.chr3.cher35	Control	3	98242516	98243019	AML1.Control-6 smooth	1.29377	0.855967	CLDND1	56650	ENSG00000080822	98216756	98241910	-1	protein_coding	claudin domain containing 1 [Source:HGNC Symbol;Acc:1322]
AML1.Control-6.smooth.chr3.cher35	Control	3	98242516	98243019	AML1.Control-6 smooth	1.29377	0.855967	RP11-227H4.5	NA	ENSG00000248839	98241414	98244178	1	antisense
AML1.Control-6.smooth.chr3.cher36	Control	3	98313430	98314328	AML1.Control-6 smooth	1.36445	3.0283	CPOX	1371	ENSG00000080819	98239976	98312567	-1	protein_coding	coproporphyrinogen oxidase [Source:HGNC Symbol;Acc:2321]
AML1.Control-6.smooth.chr3.cher37	Control	3	99358010	99358690	AML1.Control-6 smooth	1.09098	0.608204	COL8A1	1295	ENSG00000144810	99357319	99518070	1	protein_coding	collagen, type VIII, alpha 1 [Source:HGNC Symbol;Acc:2215]
AML1.Control-6.smooth.chr3.cher38	Control	3	107431128	107432038	AML1.Control-6 smooth	1.27304	1.5531	BBX	56987	ENSG00000114439	107241783	107530171	1	protein_coding	bobby sox homolog (Drosophila) [Source:HGNC Symbol;Acc:14422]
AML1.Control-6.smooth.chr3.cher40	Control	3	107810962	107811568	AML1.Control-6 smooth	1.52629	3.3018	CD47	961	ENSG00000196776	107762145	107809872	-1	protein_coding	CD47 molecule [Source:HGNC Symbol;Acc:1682]
AML1.Control-6.smooth.chr3.cher41	Control	3	109056137	109056750	AML1.Control-6 smooth	1.41077	1.85547	DPPA4	55211	ENSG00000121570	109044988	109056419	-1	protein_coding	developmental pluripotency associated 4 [Source:HGNC Symbol;Acc:19200]
AML1.Control-6.smooth.chr3.cher42	Control	3	111855990	111856874	AML1.Control-6 smooth	1.43772	3.00253	GCET2	257144	ENSG00000174500	111839688	111852152	-1	protein_coding	germinal center expressed transcript 2 [Source:HGNC Symbol;Acc:20253]
AML1.Control-6.smooth.chr3.cher43	Control	3	114106034	114106840	AML1.Control-6 smooth	1.62516	4.07703	ZBTB20-AS1	100131117	ENSG00000241560	114070658	114107825	1	antisense	ZBTB20 antisense RNA 1 (non-protein coding) [Source:HGNC Symbol;Acc:40640]
AML1.Control-6.smooth.chr3.cher43	Control	3	114106034	114106840	AML1.Control-6 smooth	1.62516	4.07703	ZBTB20	26137	ENSG00000181722	114056941	114866118	-1	protein_coding	zinc finger and BTB domain containing 20 [Source:HGNC Symbol;Acc:13503]
AML1.Control-6.smooth.chr3.cher44	Control	3	114107414	114107914	AML1.Control-6 smooth	1.27378	1.56791	ZBTB20	26137	ENSG00000181722	114056941	114866118	-1	protein_coding	zinc finger and BTB domain containing 20 [Source:HGNC Symbol;Acc:13503]
AML1.Control-6.smooth.chr3.cher44	Control	3	114107414	114107914	AML1.Control-6 smooth	1.27378	1.56791	ZBTB20-AS1	100131117	ENSG00000241560	114070658	114107825	1	antisense	ZBTB20 antisense RNA 1 (non-protein coding) [Source:HGNC Symbol;Acc:40640]
AML1.Control-6.smooth.chr3.cher45	Control	3	119318946	119319562	AML1.Control-6 smooth	1.05609	0.345898	PLA1A	51365	ENSG00000144837	119316689	119348658	1	protein_coding	phospholipase A1 member A [Source:HGNC Symbol;Acc:17661]
AML1.Control-6.smooth.chr3.cher46	Control	3	121904172	121904678	AML1.Control-6 smooth	1.1855	0.748296	CASR	846	ENSG00000036828	121902530	122005342	1	protein_coding	calcium-sensing receptor [Source:HGNC Symbol;Acc:1514]
AML1.Control-6.smooth.chr3.cher47	Control	3	122294862	122295376	AML1.Control-6 smooth	1.13995	0.345094	PARP15	165631	ENSG00000173200	122296449	122357894	1	protein_coding	poly (ADP-ribose) polymerase family, member 15 [Source:HGNC Symbol;Acc:26876]
AML1.Control-6.smooth.chr3.cher48	Control	3	122408510	122409296	AML1.Control-6 smooth	1.565	4.54224	PARP14	54625	ENSG00000173193	122399465	122449687	1	protein_coding	poly (ADP-ribose) polymerase family, member 14 [Source:HGNC Symbol;Acc:29232]
AML1.Control-6.smooth.chr3.cher49	Control	3	124734920	124735411	AML1.Control-6 smooth	1.15853	0.941316	HEG1	57493	ENSG00000173706	124684554	124774802	-1	protein_coding	HEG homolog 1 (zebrafish) [Source:HGNC Symbol;Acc:29227]
AML1.Control-6.smooth.chr3.cher50	Control	3	127874472	127874948	AML1.Control-6 smooth	1.23045	1.08478	RUVBL1	8607	ENSG00000175792	127783625	127872757	-1	protein_coding	RuvB-like 1 (E. coli) [Source:HGNC Symbol;Acc:10474]
AML1.Control-6.smooth.chr3.cher50	Control	3	127874472	127874948	AML1.Control-6 smooth	1.23045	1.08478	EEFSEC	60678	ENSG00000132394	127872297	128127485	1	protein_coding	eukaryotic elongation factor, selenocysteine-tRNA-specific [Source:HGNC Symbol;Acc:24614]
AML1.Control-6.smooth.chr3.cher52	Control	3	128775300	128775882	AML1.Control-6 smooth	1.21879	1.44991	GP9	2815	ENSG00000169704	128779610	128781249	1	protein_coding	glycoprotein IX (platelet) [Source:HGNC Symbol;Acc:4444]
AML1.Control-6.smooth.chr3.cher53	Control	3	128993442	128994106	AML1.Control-6 smooth	1.52304	2.74288	C3orf37	56941	ENSG00000183624	128997671	129024146	1	protein_coding	chromosome 3 open reading frame 37 [Source:HGNC Symbol;Acc:24446]
AML1.Control-6.smooth.chr3.cher53	Control	3	128993442	128994106	AML1.Control-6 smooth	1.52304	2.74288	COPG1	22820	ENSG00000181789	128968449	128996614	1	protein_coding	coatomer protein complex, subunit gamma 1 [Source:HGNC Symbol;Acc:2236]
AML1.Control-6.smooth.chr3.cher54	Control	3	132313723	132314236	AML1.Control-6 smooth	1.21338	1.16036	CCRL1	51554	ENSG00000129048	132316081	132337811	1	protein_coding	chemokine (C-C motif) receptor-like 1 [Source:HGNC Symbol;Acc:1611]
AML1.Control-6.smooth.chr3.cher55	Control	3	134088384	134088894	AML1.Control-6 smooth	1.28125	1.67273	AMOTL2	51421	ENSG00000114019	134074716	134094321	-1	protein_coding	angiomotin like 2 [Source:HGNC Symbol;Acc:17812]
AML1.Control-6.smooth.chr3.cher56	Control	3	135680322	135680930	AML1.Control-6 smooth	1.33451	1.54857	RP11-305O4.1	NA	ENSG00000241905	135678117	135678432	-1	pseudogene
AML1.Control-6.smooth.chr3.cher56	Control	3	135680322	135680930	AML1.Control-6 smooth	1.33451	1.54857	PPP2R3A	5523	ENSG00000073711	135684515	135866733	1	protein_coding	protein phosphatase 2, regulatory subunit B'', alpha [Source:HGNC Symbol;Acc:9307]
AML1.Control-6.smooth.chr3.cher57	Control	3	139262790	139263580	AML1.Control-6 smooth	1.27065	0.828079	RBP1	5947	ENSG00000114115	139236276	139258671	-1	protein_coding	retinol binding protein 1, cellular [Source:HGNC Symbol;Acc:9919]
AML1.Control-6.smooth.chr3.cher59	Control	3	141162566	141163083	AML1.Control-6 smooth	1.11639	0.782713	ZBTB38	253461	ENSG00000177311	141043055	141168634	1	protein_coding	zinc finger and BTB domain containing 38 [Source:HGNC Symbol;Acc:26636]
AML1.Control-6.smooth.chr3.cher60	Control	3	141163982	141164576	AML1.Control-6 smooth	1.6294	3.79363	ZBTB38	253461	ENSG00000177311	141043055	141168634	1	protein_coding	zinc finger and BTB domain containing 38 [Source:HGNC Symbol;Acc:26636]
AML1.Control-6.smooth.chr3.cher61	Control	3	141752095	141752692	AML1.Control-6 smooth	1.05556	0.329226	TFDP2	7029	ENSG00000114126	141663277	141868386	-1	protein_coding	transcription factor Dp-2 (E2F dimerization partner 2) [Source:HGNC Symbol;Acc:11751]
AML1.Control-6.smooth.chr3.cher62	Control	3	142301956	142302568	AML1.Control-6 smooth	1.92194	4.32986	ATR	545	ENSG00000175054	142168077	142297668	-1	protein_coding	ataxia telangiectasia and Rad3 related [Source:HGNC Symbol;Acc:882]
AML1.Control-6.smooth.chr3.cher64	Control	3	148584910	148585540	AML1.Control-6 smooth	1.59439	3.60394	CPA3	1359	ENSG00000163751	148583043	148614983	1	protein_coding	carboxypeptidase A3 (mast cell) [Source:HGNC Symbol;Acc:2298]
AML1.Control-6.smooth.chr3.cher65	Control	3	153836355	153836847	AML1.Control-6 smooth	1.13887	0.833104	ARHGEF26	26084	ENSG00000114790	153838792	153975616	1	protein_coding	Rho guanine nucleotide exchange factor (GEF) 26 [Source:HGNC Symbol;Acc:24490]
AML1.Control-6.smooth.chr3.cher65	Control	3	153836355	153836847	AML1.Control-6 smooth	1.13887	0.833104	ARHGEF26-AS1	100507524	ENSG00000243069	153742190	153839121	-1	antisense	ARHGEF26 antisense RNA 1 (non-protein coding) [Source:HGNC Symbol;Acc:41048]
AML1.Control-6.smooth.chr3.cher66	Control	3	155837398	155837902	AML1.Control-6 smooth	1.25456	1.54044	RP11-294L13.1	NA	ENSG00000242537	155829221	155831987	-1	pseudogene
AML1.Control-6.smooth.chr3.cher66	Control	3	155837398	155837902	AML1.Control-6 smooth	1.25456	1.54044	KCNAB1	7881	ENSG00000169282	155755490	156256545	1	protein_coding	potassium voltage-gated channel, shaker-related subfamily, beta member 1 [Source:HGNC Symbol;Acc:6228]
AML1.Control-6.smooth.chr3.cher67	Control	3	155855706	155856490	AML1.Control-6 smooth	1.50124	3.59661	KCNAB1	7881	ENSG00000169282	155755490	156256545	1	protein_coding	potassium voltage-gated channel, shaker-related subfamily, beta member 1 [Source:HGNC Symbol;Acc:6228]
AML1.Control-6.smooth.chr3.cher68	Control	3	169710486	169711006	AML1.Control-6 smooth	1.66065	3.24448	SEC62-AS1	NA	ENSG00000240373	169696324	169703503	-1	antisense	SEC62 antisense RNA 1 (non-protein coding) [Source:HGNC Symbol;Acc:40586]
AML1.Control-6.smooth.chr3.cher69	Control	3	172432262	172432741	AML1.Control-6 smooth	2.095	5.5665	NCEH1	57552	ENSG00000144959	172348039	172429008	-1	protein_coding	neutral cholesterol ester hydrolase 1 [Source:HGNC Symbol;Acc:29260]
AML1.Control-6.smooth.chr3.cher70	Control	3	180711380	180711980	AML1.Control-6 smooth	1.20876	1.07215	DNAJC19	131118	ENSG00000205981	180701497	180707562	-1	protein_coding	DnaJ (Hsp40) homolog, subfamily C, member 19 [Source:HGNC Symbol;Acc:30528]
AML1.Control-6.smooth.chr3.cher71	Control	3	182510545	182511014	AML1.Control-6 smooth	1.40644	1.14965	ATP11B	23200	ENSG00000058063	182511288	182639423	1	protein_coding	ATPase, class VI, type 11B [Source:HGNC Symbol;Acc:13553]
AML1.Control-6.smooth.chr3.cher71	Control	3	182510545	182511014	AML1.Control-6 smooth	1.40644	1.14965	RP11-225N10.1	NA	ENSG00000240063	182501024	182511182	-1	antisense
AML1.Control-6.smooth.chr3.cher72	Control	3	183871220	183871711	AML1.Control-6 smooth	1.53315	3.02254	DVL3	1857	ENSG00000161202	183873176	183891398	1	protein_coding	dishevelled, dsh homolog 3 (Drosophila) [Source:HGNC Symbol;Acc:3087]
AML1.Control-6.smooth.chr3.cher73	Control	3	186359696	186360209	AML1.Control-6 smooth	1.13203	0.779998	FETUB	26998	ENSG00000090512	186353758	186370930	1	protein_coding	fetuin B [Source:HGNC Symbol;Acc:3658]
AML1.Control-6.smooth.chr3.cher74	Control	3	187006622	187007214	AML1.Control-6 smooth	1.59575	3.71395	MASP1	5648	ENSG00000127241	186935942	187009810	-1	protein_coding	mannan-binding lectin serine peptidase 1 (C4/C2 activating component of Ra-reactive factor) [Source:HGNC Symbol;Acc:6901]
AML1.Control-6.smooth.chr3.cher75	Control	3	187932244	187932782	AML1.Control-6 smooth	1.07886	0.597241	LPP	4026	ENSG00000145012	187871072	188608460	1	protein_coding	LIM domain containing preferred translocation partner in lipoma [Source:HGNC Symbol;Acc:6679]
AML1.Control-6.smooth.chr3.cher76	Control	3	188890196	188891092	AML1.Control-6 smooth	1.46223	3.75462	TPRG1	285386	ENSG00000188001	188665003	189043093	1	protein_coding	tumor protein p63 regulated 1 [Source:HGNC Symbol;Acc:24759]
AML1.Control-6.smooth.chr3.cher77	Control	3	190040846	190041451	AML1.Control-6 smooth	1.44699	2.7622	CLDN1	9076	ENSG00000163347	190023490	190040264	-1	protein_coding	claudin 1 [Source:HGNC Symbol;Acc:2032]
AML1.Control-6.smooth.chr3.cher77	Control	3	190040846	190041451	AML1.Control-6 smooth	1.44699	2.7622	CLDN16	10686	ENSG00000113946	190040330	190129932	1	protein_coding	claudin 16 [Source:HGNC Symbol;Acc:2037]
AML1.Control-6.smooth.chr3.cher78	Control	3	192961174	192961753	AML1.Control-6 smooth	1.37872	2.35223	HRASLS	57110	ENSG00000127252	192958914	192995527	1	protein_coding	HRAS-like suppressor [Source:HGNC Symbol;Acc:14922]
AML1.Control-6.smooth.chr3.cher79	Control	3	194096568	194097158	AML1.Control-6 smooth	1.01508	0.232353	LRRC15	131578	ENSG00000172061	194075976	194090472	-1	protein_coding	leucine rich repeat containing 15 [Source:HGNC Symbol;Acc:20818]
AML1.Control-6.smooth.chr3.cher80	Control	3	196299149	196299762	AML1.Control-6 smooth	1.50087	3.21325	WDR53	348793	ENSG00000185798	196281056	196295545	-1	protein_coding	WD repeat domain 53 [Source:HGNC Symbol;Acc:28786]
AML1.Control-6.smooth.chr4.cher1	Control	4	471338	471818	AML1.Control-6 smooth	1.34503	1.89752	ABCA11P	79963	ENSG00000251595	419224	467918	-1	pseudogene	ATP-binding cassette, sub-family A (ABC1), member 11, pseudogene [Source:HGNC Symbol;Acc:31]
AML1.Control-6.smooth.chr4.cher1	Control	4	471338	471818	AML1.Control-6 smooth	1.34503	1.89752	ZNF721	170960	ENSG00000182903	419604	492945	-1	protein_coding	zinc finger protein 721 [Source:HGNC Symbol;Acc:29425]
AML1.Control-6.smooth.chr4.cher2	Control	4	721492	722098	AML1.Control-6 smooth	1.45341	2.88085	RP11-1191J2.4	NA	ENSG00000248416	716064	717823	-1	antisense
AML1.Control-6.smooth.chr4.cher2	Control	4	721492	722098	AML1.Control-6 smooth	1.45341	2.88085	PCGF3	10336	ENSG00000185619	699537	764428	1	protein_coding	polycomb group ring finger 3 [Source:HGNC Symbol;Acc:10066]
AML1.Control-6.smooth.chr4.cher3	Control	4	866976	867870	AML1.Control-6 smooth	1.67638	5.90357	GAK	2580	ENSG00000178950	843064	926161	-1	protein_coding	cyclin G associated kinase [Source:HGNC Symbol;Acc:4113]
AML1.Control-6.smooth.chr4.cher4	Control	4	2421988	2422482	AML1.Control-6 smooth	1.13182	0.899039	RP11-503N18.2	NA	ENSG00000249391	2428248	2452087	1	processed_transcript
AML1.Control-6.smooth.chr4.cher4	Control	4	2421988	2422482	AML1.Control-6 smooth	1.13182	0.899039	ZFYVE28	57732	ENSG00000159733	2271309	2420390	-1	protein_coding	zinc finger, FYVE domain containing 28 [Source:HGNC Symbol;Acc:29334]
AML1.Control-6.smooth.chr4.cher4	Control	4	2421988	2422482	AML1.Control-6 smooth	1.13182	0.899039	RP11-503N18.1	NA	ENSG00000206113	2420701	2430972	1	antisense
AML1.Control-6.smooth.chr4.cher5	Control	4	3072365	3072944	AML1.Control-6 smooth	1.60524	3.38296	HTT	3064	ENSG00000197386	3076408	3245676	1	protein_coding	huntingtin [Source:HGNC Symbol;Acc:4851]
AML1.Control-6.smooth.chr4.cher6	Control	4	3384428	3385030	AML1.Control-6 smooth	1.60294	2.6882	RGS12	6002	ENSG00000159788	3294755	3441640	1	protein_coding	regulator of G-protein signaling 12 [Source:HGNC Symbol;Acc:9994]
AML1.Control-6.smooth.chr4.cher7	Control	4	5895361	5895940	AML1.Control-6 smooth	1.39045	2.25257	CRMP1	1400	ENSG00000072832	5749811	5894785	-1	protein_coding	collapsin response mediator protein 1 [Source:HGNC Symbol;Acc:2365]
AML1.Control-6.smooth.chr4.cher8	Control	4	7880160	7880896	AML1.Control-6 smooth	1.12474	0.790843	AFAP1	60312	ENSG00000196526	7760441	7941653	-1	protein_coding	actin filament associated protein 1 [Source:HGNC Symbol;Acc:24017]
AML1.Control-6.smooth.chr4.cher9	Control	4	7935454	7936068	AML1.Control-6 smooth	1.1195	0.875418	AC097381.1	NA	ENSG00000228919	7940728	7942023	1	protein_coding
AML1.Control-6.smooth.chr4.cher10	Control	4	10460478	10461364	AML1.Control-6 smooth	1.44543	1.50105	ZNF518B	85460	ENSG00000178163	10441498	10459034	-1	protein_coding	zinc finger protein 518B [Source:HGNC Symbol;Acc:29365]
AML1.Control-6.smooth.chr4.cher11	Control	4	11365498	11367316	AML1.Control-6 smooth	1.18861	2.40912	RNPS1P1	NA	ENSG00000250896	11373599	11374516	1	pseudogene	RNA binding protein S1, serine-rich domain pseudogene 1 [Source:HGNC Symbol;Acc:39525]
AML1.Control-6.smooth.chr4.cher11	Control	4	11365498	11367316	AML1.Control-6 smooth	1.18861	2.40912	MIR572	693157	ENSG00000207716	11370451	11370545	1	miRNA	microRNA 572 [Source:HGNC Symbol;Acc:32828]
AML1.Control-6.smooth.chr4.cher14	Control	4	17492284	17492883	AML1.Control-6 smooth	1.15508	0.88278	QDPR	5860	ENSG00000151552	17461884	17513857	-1	protein_coding	quinoid dihydropteridine reductase [Source:HGNC Symbol;Acc:9752]
AML1.Control-6.smooth.chr4.cher15	Control	4	22519230	22519800	AML1.Control-6 smooth	1.21295	1.16732	GPR125	166647	ENSG00000152990	22346694	22517677	-1	protein_coding	G protein-coupled receptor 125 [Source:HGNC Symbol;Acc:13839]
AML1.Control-6.smooth.chr4.cher16	Control	4	37457134	37457952	AML1.Control-6 smooth	1.48599	2.47116	C4orf19	55286	ENSG00000154274	37455563	37625117	1	protein_coding	chromosome 4 open reading frame 19 [Source:HGNC Symbol;Acc:25618]
AML1.Control-6.smooth.chr4.cher17	Control	4	41257861	41258588	AML1.Control-6 smooth	1.24085	1.48503	UCHL1	7345	ENSG00000154277	41258430	41270472	1	protein_coding	ubiquitin carboxyl-terminal esterase L1 (ubiquitin thiolesterase) [Source:HGNC Symbol;Acc:12513]
AML1.Control-6.smooth.chr4.cher17	Control	4	41257861	41258588	AML1.Control-6 smooth	1.24085	1.48503	RP11-124A7.2	101410542	ENSG00000251173	41222091	41258744	-1	antisense
AML1.Control-6.smooth.chr4.cher18	Control	4	54856986	54857584	AML1.Control-6 smooth	1.41479	2.19356	RPL21P44	402176	ENSG00000229585	54852751	54853225	-1	pseudogene	ribosomal protein L21 pseudogene 44 [Source:HGNC Symbol;Acc:33820]
AML1.Control-6.smooth.chr4.cher19	Control	4	54964654	54965346	AML1.Control-6 smooth	1.15652	1.05206	GSX2	170825	ENSG00000180613	54965690	54968672	1	protein_coding	GS homeobox 2 [Source:HGNC Symbol;Acc:24959]
AML1.Control-6.smooth.chr4.cher20	Control	4	68928174	68928871	AML1.Control-6 smooth	1.34799	0.947479	RP11-453E17.1	550112	ENSG00000248049	68566998	68946670	1	lincRNA
AML1.Control-6.smooth.chr4.cher20	Control	4	68928174	68928871	AML1.Control-6 smooth	1.34799	0.947479	RP11-35D5.1	401135	ENSG00000215127	68926312	68929015	-1	pseudogene
AML1.Control-6.smooth.chr4.cher21	Control	4	77136778	77138320	AML1.Control-6 smooth	1.73145	7.94548	SCARB2	950	ENSG00000138760	77079890	77135046	-1	protein_coding	scavenger receptor class B, member 2 [Source:HGNC Symbol;Acc:1665]
AML1.Control-6.smooth.chr4.cher21	Control	4	77136778	77138320	AML1.Control-6 smooth	1.73145	7.94548	FAM47E	100129583	ENSG00000189157	77135193	77232282	1	protein_coding	family with sequence similarity 47, member E [Source:HGNC Symbol;Acc:34343]
AML1.Control-6.smooth.chr4.cher22	Control	4	77356976	77357506	AML1.Control-6 smooth	1.29768	1.41507	SHROOM3	100996628	ENSG00000138771	77356253	77704406	1	protein_coding	shroom family member 3 [Source:HGNC Symbol;Acc:30422]
AML1.Control-6.smooth.chr4.cher23	Control	4	77633090	77633710	AML1.Control-6 smooth	1.18716	0.765276	SHROOM3	100996628	ENSG00000138771	77356253	77704406	1	protein_coding	shroom family member 3 [Source:HGNC Symbol;Acc:30422]
AML1.Control-6.smooth.chr4.cher24	Control	4	81121018	81121484	AML1.Control-6 smooth	1.06048	0.374608	PRDM8	56978	ENSG00000152784	81105033	81125483	1	protein_coding	PR domain containing 8 [Source:HGNC Symbol;Acc:13993]
AML1.Control-6.smooth.chr4.cher25	Control	4	84458224	84458692	AML1.Control-6 smooth	1.18013	0.89055	AGPAT9	84803	ENSG00000138678	84457067	84527028	1	protein_coding	1-acylglycerol-3-phosphate O-acyltransferase 9 [Source:HGNC Symbol;Acc:28157]
AML1.Control-6.smooth.chr4.cher26	Control	4	96027544	96028359	AML1.Control-6 smooth	1.83008	5.90516	BMPR1B	658	ENSG00000138696	95679119	96079599	1	protein_coding	bone morphogenetic protein receptor, type IB [Source:HGNC Symbol;Acc:1077]
AML1.Control-6.smooth.chr4.cher27	Control	4	101438538	101439104	AML1.Control-6 smooth	1.68703	4.3029	EMCN	51705	ENSG00000164035	101316498	101801283	-1	protein_coding	endomucin [Source:HGNC Symbol;Acc:16041]
AML1.Control-6.smooth.chr4.cher28	Control	4	103944860	103945366	AML1.Control-6 smooth	1.07809	0.495317	SLC9B1	101929373	ENSG00000164037	103806205	103940896	-1	protein_coding	solute carrier family 9, subfamily B (NHA1, cation proton antiporter 1), member 1 [Source:HGNC Symbol;Acc:24244]
AML1.Control-6.smooth.chr4.cher29	Control	4	106068076	106068554	AML1.Control-6 smooth	1.57675	3.21426	TET2	54790	ENSG00000168769	106067032	106200973	1	protein_coding	tet methylcytosine dioxygenase 2 [Source:HGNC Symbol;Acc:25941]
AML1.Control-6.smooth.chr4.cher29	Control	4	106068076	106068554	AML1.Control-6 smooth	1.57675	3.21426	AC004069.2	101929491	ENSG00000251259	106058437	106061776	-1	lincRNA
AML1.Control-6.smooth.chr4.cher30	Control	4	113442743	113443228	AML1.Control-6 smooth	1.05388	0.295737	NEUROG2	63973	ENSG00000178403	113434672	113437328	-1	protein_coding	neurogenin 2 [Source:HGNC Symbol;Acc:13805]
AML1.Control-6.smooth.chr4.cher31	Control	4	120225042	120226339	AML1.Control-6 smooth	1.64651	5.02448	C4orf3	401152	ENSG00000164096	120218207	120225600	-1	protein_coding	chromosome 4 open reading frame 3 [Source:HGNC Symbol;Acc:19225]
AML1.Control-6.smooth.chr4.cher33	Control	4	129749942	129750544	AML1.Control-6 smooth	1.2395	1.37676	PHF17	79960	ENSG00000077684	129730779	129796379	1	protein_coding	PHD finger protein 17 [Source:HGNC Symbol;Acc:30027]
AML1.Control-6.smooth.chr4.cher34	Control	4	153707164	153707746	AML1.Control-6 smooth	1.30985	1.85985	TIGD4	201798	ENSG00000169989	153690506	153700916	-1	protein_coding	tigger transposable element derived 4 [Source:HGNC Symbol;Acc:18335]
AML1.Control-6.smooth.chr4.cher35	Control	4	155511903	155512522	AML1.Control-6 smooth	1.17598	1.26349	FGA	2243	ENSG00000171560	155504278	155511918	-1	protein_coding	fibrinogen alpha chain [Source:HGNC Symbol;Acc:3661]
AML1.Control-6.smooth.chr4.cher36	Control	4	155539423	155539910	AML1.Control-6 smooth	1.46478	2.42746	FGG	2266	ENSG00000171557	155525286	155534119	-1	protein_coding	fibrinogen gamma chain [Source:HGNC Symbol;Acc:3694]
AML1.Control-6.smooth.chr4.cher37	Control	4	159960408	159961114	AML1.Control-6 smooth	1.52466	2.95174	C4orf45	152940	ENSG00000164123	159814286	159959912	-1	protein_coding	chromosome 4 open reading frame 45 [Source:HGNC Symbol;Acc:26342]
AML1.Control-6.smooth.chr4.cher38	Control	4	174087782	174088261	AML1.Control-6 smooth	1.14238	0.574318	GALNT7	51809	ENSG00000109586	174089904	174245118	1	protein_coding	UDP-N-acetyl-alpha-D-galactosamine:polypeptide N-acetylgalactosaminyltransferase 7 (GalNAc-T7) [Source:HGNC Symbol;Acc:4129]
AML1.Control-6.smooth.chr4.cher38	Control	4	174087782	174088261	AML1.Control-6 smooth	1.14238	0.574318	RP11-10K16.1	NA	ENSG00000245213	174053079	174090803	-1	lincRNA
AML1.Control-6.smooth.chr4.cher39	Control	4	185399056	185399532	AML1.Control-6 smooth	1.28003	1.26417	IRF2	3660	ENSG00000168310	185308867	185395734	-1	protein_coding	interferon regulatory factor 2 [Source:HGNC Symbol;Acc:6117]
AML1.Control-6.smooth.chr4.cher40	Control	4	185935026	185935527	AML1.Control-6 smooth	1.27255	1.61149	HELT	391723	ENSG00000187821	185939995	185941958	1	protein_coding	helt bHLH transcription factor [Source:HGNC Symbol;Acc:33783]
AML1.Control-6.smooth.chr4.cher41	Control	4	186210730	186211506	AML1.Control-6 smooth	1.38428	2.30159	SNX25	83891	ENSG00000109762	186125391	186291339	1	protein_coding	sorting nexin 25 [Source:HGNC Symbol;Acc:21883]
AML1.Control-6.smooth.chr5.cher1	Control	5	5423844	5424664	AML1.Control-6 smooth	1.07308	0.781368	KIAA0947	23379	ENSG00000164151	5420777	5490347	1	protein_coding	KIAA0947 [Source:HGNC Symbol;Acc:29154]
AML1.Control-6.smooth.chr5.cher2	Control	5	6623941	6624650	AML1.Control-6 smooth	1.06063	0.47319	NSUN2	54888	ENSG00000037474	6599352	6633404	-1	protein_coding	NOP2/Sun domain family, member 2 [Source:HGNC Symbol;Acc:25994]
AML1.Control-6.smooth.chr5.cher4	Control	5	13944618	13945518	AML1.Control-6 smooth	1.29489	2.10391	DNAH5	1767	ENSG00000039139	13690440	13944652	-1	protein_coding	dynein, axonemal, heavy chain 5 [Source:HGNC Symbol;Acc:2950]
AML1.Control-6.smooth.chr5.cher5	Control	5	31528733	31529201	AML1.Control-6 smooth	1.09502	0.292194	DROSHA	29102	ENSG00000113360	31400604	31532303	-1	protein_coding	drosha, ribonuclease type III [Source:HGNC Symbol;Acc:17904]
AML1.Control-6.smooth.chr5.cher5	Control	5	31528733	31529201	AML1.Control-6 smooth	1.09502	0.292194	C5orf22	55322	ENSG00000082213	31532373	31555165	1	protein_coding	chromosome 5 open reading frame 22 [Source:HGNC Symbol;Acc:25639]
AML1.Control-6.smooth.chr5.cher6	Control	5	32144760	32145358	AML1.Control-6 smooth	1.05155	0.369215	GOLPH3	64083	ENSG00000113384	32124810	32174456	-1	protein_coding	golgi phosphoprotein 3 (coat-protein) [Source:HGNC Symbol;Acc:15452]
AML1.Control-6.smooth.chr5.cher7	Control	5	32450096	32450586	AML1.Control-6 smooth	1.36118	1.94487	ZFR	51663	ENSG00000056097	32354456	32444867	-1	protein_coding	zinc finger RNA binding protein [Source:HGNC Symbol;Acc:17277]
AML1.Control-6.smooth.chr5.cher8	Control	5	33988216	33988714	AML1.Control-6 smooth	1.2614	1.35033	SLC45A2	51151	ENSG00000164175	33944721	33984835	-1	protein_coding	solute carrier family 45, member 2 [Source:HGNC Symbol;Acc:16472]
AML1.Control-6.smooth.chr5.cher9	Control	5	34048187	34048936	AML1.Control-6 smooth	1.13093	0.972152	C1QTNF3	114899	ENSG00000082196	33987279	34124633	-1	protein_coding	C1q and tumor necrosis factor related protein 3 [Source:HGNC Symbol;Acc:14326]
AML1.Control-6.smooth.chr5.cher10	Control	5	34679896	34680408	AML1.Control-6 smooth	1.08248	0.421403	RAI14	26064	ENSG00000039560	34656342	34832732	1	protein_coding	retinoic acid induced 14 [Source:HGNC Symbol;Acc:14873]
AML1.Control-6.smooth.chr5.cher11	Control	5	35936122	35936628	AML1.Control-6 smooth	1.32358	1.2314	RP11-79C6.3	100506406	ENSG00000249748	35938924	35940095	1	antisense
AML1.Control-6.smooth.chr5.cher11	Control	5	35936122	35936628	AML1.Control-6 smooth	1.32358	1.2314	CAPSL	133690	ENSG00000152611	35904397	35938881	-1	protein_coding	calcyphosine-like [Source:HGNC Symbol;Acc:28375]
AML1.Control-6.smooth.chr5.cher12	Control	5	36158980	36159492	AML1.Control-6 smooth	1.05553	0.403366	LMBRD2	92255	ENSG00000164187	36098514	36152063	-1	protein_coding	LMBR1 domain containing 2 [Source:HGNC Symbol;Acc:25287]
AML1.Control-6.smooth.chr5.cher13	Control	5	36874848	36875422	AML1.Control-6 smooth	1.27054	1.09744	NIPBL	25836	ENSG00000164190	36876861	37066515	1	protein_coding	Nipped-B homolog (Drosophila) [Source:HGNC Symbol;Acc:28862]
AML1.Control-6.smooth.chr5.cher13	Control	5	36874848	36875422	AML1.Control-6 smooth	1.27054	1.09744	CTD-2653M23.2	NA	ENSG00000248044	36864527	36876759	-1	lincRNA
AML1.Control-6.smooth.chr5.cher14	Control	5	39216824	39217794	AML1.Control-6 smooth	1.22103	2.12109	FYB	2533	ENSG00000082074	39105338	39274630	-1	protein_coding	FYN binding protein [Source:HGNC Symbol;Acc:4036]
AML1.Control-6.smooth.chr5.cher15	Control	5	40834762	40835254	AML1.Control-6 smooth	1.08767	0.57311	RPL37	6167	ENSG00000145592	40825364	40835437	-1	protein_coding	ribosomal protein L37 [Source:HGNC Symbol;Acc:10347]
AML1.Control-6.smooth.chr5.cher15	Control	5	40834762	40835254	AML1.Control-6 smooth	1.08767	0.57311	CARD6	84674	ENSG00000132357	40841286	40860275	1	protein_coding	caspase recruitment domain family, member 6 [Source:HGNC Symbol;Acc:16394]
AML1.Control-6.smooth.chr5.cher15	Control	5	40834762	40835254	AML1.Control-6 smooth	1.08767	0.57311	SNORD72	619564	ENSG00000212296	40832758	40832837	-1	snoRNA	small nucleolar RNA, C/D box 72 [Source:HGNC Symbol;Acc:32733]
AML1.Control-6.smooth.chr5.cher16	Control	5	41264364	41264978	AML1.Control-6 smooth	1.09882	0.550121	C6	729	ENSG00000039537	41142336	41261540	-1	protein_coding	complement component 6 [Source:HGNC Symbol;Acc:1339]
AML1.Control-6.smooth.chr5.cher17	Control	5	54317830	54318450	AML1.Control-6 smooth	1.31379	1.93284	GZMK	3003	ENSG00000113088	54320081	54330398	1	protein_coding	granzyme K (granzyme 3; tryptase II) [Source:HGNC Symbol;Acc:4711]
AML1.Control-6.smooth.chr5.cher17	Control	5	54317830	54318450	AML1.Control-6 smooth	1.31379	1.93284	CTD-2313F11.1	102467081	ENSG00000240535	54317127	54319997	-1	antisense
AML1.Control-6.smooth.chr5.cher19	Control	5	60187742	60188322	AML1.Control-6 smooth	1.34075	2.29796	GNL3LP1	NA	ENSG00000215032	60187762	60189404	-1	pseudogene	guanine nucleotide binding protein-like 3 (nucleolar)-like pseudogene 1 [Source:HGNC Symbol;Acc:25733]
AML1.Control-6.smooth.chr5.cher20	Control	5	60928161	60928864	AML1.Control-6 smooth	1.15097	0.764883	C5orf64	285668	ENSG00000178722	60933535	61047590	1	protein_coding	chromosome 5 open reading frame 64 [Source:HGNC Symbol;Acc:26744]
AML1.Control-6.smooth.chr5.cher21	Control	5	66299150	66299734	AML1.Control-6 smooth	1.44701	2.3508	MAST4	375449	ENSG00000069020	65892176	66465423	1	protein_coding	microtubule associated serine/threonine kinase family member 4 [Source:HGNC Symbol;Acc:19037]
AML1.Control-6.smooth.chr5.cher21	Control	5	66299150	66299734	AML1.Control-6 smooth	1.44701	2.3508	MAST4-AS1	NA	ENSG00000229666	66297211	66299781	-1	antisense	MAST4 antisense RNA 1 (non-protein coding) [Source:HGNC Symbol;Acc:40865]
AML1.Control-6.smooth.chr5.cher22	Control	5	79326754	79327524	AML1.Control-6 smooth	1.39026	2.77068	THBS4	7060	ENSG00000113296	79287134	79379110	1	protein_coding	thrombospondin 4 [Source:HGNC Symbol;Acc:11788]
AML1.Control-6.smooth.chr5.cher23	Control	5	79550076	79550682	AML1.Control-6 smooth	1.76788	2.20145	SERINC5	256987	ENSG00000164300	79407050	79551898	-1	protein_coding	serine incorporator 5 [Source:HGNC Symbol;Acc:18825]
AML1.Control-6.smooth.chr5.cher24	Control	5	96216228	96217326	AML1.Control-6 smooth	1.29216	2.3692	ERAP2	64167	ENSG00000164308	96211643	96255420	1	protein_coding	endoplasmic reticulum aminopeptidase 2 [Source:HGNC Symbol;Acc:29499]
AML1.Control-6.smooth.chr5.cher25	Control	5	102592371	102593172	AML1.Control-6 smooth	1.60293	3.06377	CTC-503K11.2	NA	ENSG00000248203	102581749	102589220	-1	antisense
AML1.Control-6.smooth.chr5.cher25	Control	5	102592371	102593172	AML1.Control-6 smooth	1.60293	3.06377	C5orf30	90355	ENSG00000181751	102594403	102614361	1	protein_coding	chromosome 5 open reading frame 30 [Source:HGNC Symbol;Acc:25052]
AML1.Control-6.smooth.chr5.cher26	Control	5	108748429	108748918	AML1.Control-6 smooth	1.33065	1.28646	PJA2	9867	ENSG00000198961	108670410	108745695	-1	protein_coding	praja ring finger 2, E3 ubiquitin protein ligase [Source:HGNC Symbol;Acc:17481]
AML1.Control-6.smooth.chr5.cher27	Control	5	110409134	110409631	AML1.Control-6 smooth	1.17844	1.14864	TSLP	85480	ENSG00000145777	110405760	110413722	1	protein_coding	thymic stromal lymphopoietin [Source:HGNC Symbol;Acc:30743]
AML1.Control-6.smooth.chr5.cher28	Control	5	112775014	112775518	AML1.Control-6 smooth	1.68136	4.11187	TSSK1B	83942	ENSG00000212122	112768251	112770728	-1	protein_coding	testis-specific serine kinase 1B [Source:HGNC Symbol;Acc:14968]
AML1.Control-6.smooth.chr5.cher29	Control	5	118604814	118605394	AML1.Control-6 smooth	1.32679	1.5823	TNFAIP8	25816	ENSG00000145779	118604387	118730294	1	protein_coding	tumor necrosis factor, alpha-induced protein 8 [Source:HGNC Symbol;Acc:17260]
AML1.Control-6.smooth.chr5.cher30	Control	5	118966790	118967388	AML1.Control-6 smooth	1.33417	1.39511	FAM170A	340069	ENSG00000164334	118965254	118971517	1	protein_coding	family with sequence similarity 170, member A [Source:HGNC Symbol;Acc:27963]
AML1.Control-6.smooth.chr5.cher31	Control	5	126850474	126851292	AML1.Control-6 smooth	1.20216	1.78651	PRRC1	133619	ENSG00000164244	126853301	126890782	1	protein_coding	proline-rich coiled-coil 1 [Source:HGNC Symbol;Acc:28164]
AML1.Control-6.smooth.chr5.cher31	Control	5	126850474	126851292	AML1.Control-6 smooth	1.20216	1.78651	HNRNPKP1	NA	ENSG00000250859	126847156	126848534	-1	pseudogene	heterogeneous nuclear ribonucleoprotein K pseudogene 1 [Source:HGNC Symbol;Acc:42374]
AML1.Control-6.smooth.chr5.cher32	Control	5	127415906	127416409	AML1.Control-6 smooth	1.44605	1.57154	SLC12A2	6558	ENSG00000064651	127419458	127525380	1	protein_coding	solute carrier family 12 (sodium/potassium/chloride transporters), member 2 [Source:HGNC Symbol;Acc:10911]
AML1.Control-6.smooth.chr5.cher32	Control	5	127415906	127416409	AML1.Control-6 smooth	1.44605	1.57154	CTC-228N24.3	101930640	ENSG00000245937	127276118	127418792	-1	lincRNA
AML1.Control-6.smooth.chr5.cher33	Control	5	130506980	130507552	AML1.Control-6 smooth	1.69846	4.71368	HINT1	3094	ENSG00000169567	130494720	130507428	-1	protein_coding	histidine triad nucleotide binding protein 1 [Source:HGNC Symbol;Acc:4912]
AML1.Control-6.smooth.chr5.cher33	Control	5	130506980	130507552	AML1.Control-6 smooth	1.69846	4.71368	LYRM7	90624	ENSG00000186687	130506503	130541119	1	protein_coding	Lyrm7 homolog (mouse) [Source:HGNC Symbol;Acc:28072]
AML1.Control-6.smooth.chr5.cher34	Control	5	131130436	131130944	AML1.Control-6 smooth	1.24532	1.22031	FNIP1	96459	ENSG00000217128	130761584	131132756	-1	protein_coding	folliculin interacting protein 1 [Source:HGNC Symbol;Acc:29418]
AML1.Control-6.smooth.chr5.cher36	Control	5	131316378	131316854	AML1.Control-6 smooth	1.13879	0.925481	ACSL6	23305	ENSG00000164398	131142683	131347936	-1	protein_coding	acyl-CoA synthetase long-chain family member 6 [Source:HGNC Symbol;Acc:16496]
AML1.Control-6.smooth.chr5.cher39	Control	5	131708074	131708544	AML1.Control-6 smooth	1.24884	1.25719	SLC22A5	6584	ENSG00000197375	131705444	131731306	1	protein_coding	solute carrier family 22 (organic cation/carnitine transporter), member 5 [Source:HGNC Symbol;Acc:10969]
AML1.Control-6.smooth.chr5.cher39	Control	5	131708074	131708544	AML1.Control-6 smooth	1.24884	1.25719	AC034220.3	553103	ENSG00000233006	131646978	131705608	-1	processed_transcript
AML1.Control-6.smooth.chr5.cher40	Control	5	131718566	131719150	AML1.Control-6 smooth	1.38632	0.872393	SLC22A5	6584	ENSG00000197375	131705444	131731306	1	protein_coding	solute carrier family 22 (organic cation/carnitine transporter), member 5 [Source:HGNC Symbol;Acc:10969]
AML1.Control-6.smooth.chr5.cher41	Control	5	131898475	131899044	AML1.Control-6 smooth	1.40234	1.55891	IL5	3567	ENSG00000113525	131877136	131892530	-1	protein_coding	interleukin 5 (colony-stimulating factor, eosinophil) [Source:HGNC Symbol;Acc:6016]
AML1.Control-6.smooth.chr5.cher42	Control	5	132084142	132084654	AML1.Control-6 smooth	1.13653	0.617647	CCNI2	645121	ENSG00000205089	132083137	132089856	1	protein_coding	cyclin I family, member 2 [Source:HGNC Symbol;Acc:33869]
AML1.Control-6.smooth.chr5.cher43	Control	5	133749706	133750196	AML1.Control-6 smooth	1.79253	4.42936	CDKN2AIPNL	91368	ENSG00000237190	133737778	133747589	-1	protein_coding	CDKN2A interacting protein N-terminal like [Source:HGNC Symbol;Acc:30545]
AML1.Control-6.smooth.chr5.cher44	Control	5	133855774	133856502	AML1.Control-6 smooth	1.67327	2.33345	PHF15	23338	ENSG00000043143	133860003	133918918	1	protein_coding	PHD finger protein 15 [Source:HGNC Symbol;Acc:22984]
AML1.Control-6.smooth.chr5.cher45	Control	5	136833340	136833840	AML1.Control-6 smooth	1.1708	1.10861	SPOCK1	6695	ENSG00000152377	136310987	136934068	-1	protein_coding	sparc/osteonectin, cwcv and kazal-like domains proteoglycan (testican) 1 [Source:HGNC Symbol;Acc:11251]
AML1.Control-6.smooth.chr5.cher46	Control	5	137413936	137414726	AML1.Control-6 smooth	1.2027	1.12546	WNT8A	7478	ENSG00000061492	137419581	137428054	1	protein_coding	wingless-type MMTV integration site family, member 8A [Source:HGNC Symbol;Acc:12788]
AML1.Control-6.smooth.chr5.cher47	Control	5	139726508	139727128	AML1.Control-6 smooth	1.36608	1.35548	HBEGF	1839	ENSG00000113070	139712428	139726216	-1	protein_coding	heparin-binding EGF-like growth factor [Source:HGNC Symbol;Acc:3059]
AML1.Control-6.smooth.chr5.cher48	Control	5	140080462	140081074	AML1.Control-6 smooth	1.24646	1.496	ZMAT2	153527	ENSG00000146007	140079747	140086266	1	protein_coding	zinc finger, matrin-type 2 [Source:HGNC Symbol;Acc:26433]
AML1.Control-6.smooth.chr5.cher49	Control	5	140529582	140530196	AML1.Control-6 smooth	1.3901	2.10452	PCDHB6	56130	ENSG00000113211	140529683	140532868	1	protein_coding	protocadherin beta 6 [Source:HGNC Symbol;Acc:8691]
AML1.Control-6.smooth.chr5.cher49	Control	5	140529582	140530196	AML1.Control-6 smooth	1.3901	2.10452	AC005754.1	NA	ENSG00000255622	140535577	140538639	1	protein_coding	Protocadherin-psi1; Uncharacterized protein [Source:UniProtKB/TrEMBL;Acc:Q96T98]
AML1.Control-6.smooth.chr5.cher50	Control	5	140750344	140751024	AML1.Control-6 smooth	1.9375	6.36979	PCDHGA6	56109	ENSG00000253731	140753651	140892546	1	protein_coding	protocadherin gamma subfamily A, 6 [Source:HGNC Symbol;Acc:8704]
AML1.Control-6.smooth.chr5.cher50	Control	5	140750344	140751024	AML1.Control-6 smooth	1.9375	6.36979	PCDHGB3	56102	ENSG00000262209	140749831	140892546	1	protein_coding	protocadherin gamma subfamily B, 3 [Source:HGNC Symbol;Acc:8710]
AML1.Control-6.smooth.chr5.cher51	Control	5	141014662	141015158	AML1.Control-6 smooth	1.25355	1.51691	HDAC3	8841	ENSG00000171720	141000443	141016437	-1	protein_coding	histone deacetylase 3 [Source:HGNC Symbol;Acc:4854]
AML1.Control-6.smooth.chr5.cher51	Control	5	141014662	141015158	AML1.Control-6 smooth	1.25355	1.51691	RELL2	285613	ENSG00000164620	141016517	141020644	1	protein_coding	RELT-like 2 [Source:HGNC Symbol;Acc:26902]
AML1.Control-6.smooth.chr5.cher54	Control	5	142076609	142077122	AML1.Control-6 smooth	1.13708	0.894769	AC005592.3	NA	ENSG00000261757	142083347	142084986	1	lincRNA
AML1.Control-6.smooth.chr5.cher54	Control	5	142076609	142077122	AML1.Control-6 smooth	1.13708	0.894769	FGF1	2246	ENSG00000113578	141971743	142077617	-1	protein_coding	fibroblast growth factor 1 (acidic) [Source:HGNC Symbol;Acc:3665]
AML1.Control-6.smooth.chr5.cher59	Control	5	147694124	147694652	AML1.Control-6 smooth	1.16822	0.912262	SPINK9	643394	ENSG00000204909	147700766	147719412	1	protein_coding	serine peptidase inhibitor, Kazal type 9 [Source:HGNC Symbol;Acc:32951]
AML1.Control-6.smooth.chr5.cher59	Control	5	147694124	147694652	AML1.Control-6 smooth	1.16822	0.912262	RP11-373N22.4	NA	ENSG00000254282	147693506	147695485	1	processed_transcript
AML1.Control-6.smooth.chr5.cher59	Control	5	147694124	147694652	AML1.Control-6 smooth	1.16822	0.912262	SPINK7	84651	ENSG00000145879	147691982	147695485	1	protein_coding	serine peptidase inhibitor, Kazal type 7 (putative) [Source:HGNC Symbol;Acc:24643]
AML1.Control-6.smooth.chr5.cher60	Control	5	148804534	148805242	AML1.Control-6 smooth	1.12852	0.866447	MIR143	406935	ENSG00000208035	148808481	148808586	1	miRNA	microRNA 143 [Source:HGNC Symbol;Acc:31530]
AML1.Control-6.smooth.chr5.cher60	Control	5	148804534	148805242	AML1.Control-6 smooth	1.12852	0.866447	MIR145	NA	ENSG00000207700	148810209	148810296	1	miRNA	microRNA 145 [Source:HGNC Symbol;Acc:31532]
AML1.Control-6.smooth.chr5.cher61	Control	5	150077828	150078334	AML1.Control-6 smooth	1.16126	0.998851	RBM22	55696	ENSG00000086589	150070356	150080669	-1	protein_coding	RNA binding motif protein 22 [Source:HGNC Symbol;Acc:25503]
AML1.Control-6.smooth.chr5.cher62	Control	5	150140716	150141504	AML1.Control-6 smooth	1.46434	3.41847	DCTN4	51164	ENSG00000132912	150088002	150138671	-1	protein_coding	dynactin 4 (p62) [Source:HGNC Symbol;Acc:15518]
AML1.Control-6.smooth.chr5.cher63	Control	5	150541966	150542446	AML1.Control-6 smooth	1.30202	1.80332	ANXA6	309	ENSG00000197043	150480273	150537443	-1	protein_coding	annexin A6 [Source:HGNC Symbol;Acc:544]
AML1.Control-6.smooth.chr5.cher63	Control	5	150541966	150542446	AML1.Control-6 smooth	1.30202	1.80332	CTB-17P3.4	NA	ENSG00000254298	150537667	150538023	-1	lincRNA
AML1.Control-6.smooth.chr5.cher64	Control	5	150604714	150605484	AML1.Control-6 smooth	1.51345	3.85924	CCDC69	26112	ENSG00000198624	150560613	150603706	-1	protein_coding	coiled-coil domain containing 69 [Source:HGNC Symbol;Acc:24487]
AML1.Control-6.smooth.chr5.cher65	Control	5	153782970	153783480	AML1.Control-6 smooth	1.35339	1.69932	GALNT10	55568	ENSG00000164574	153570290	153800544	1	protein_coding	UDP-N-acetyl-alpha-D-galactosamine:polypeptide N-acetylgalactosaminyltransferase 10 (GalNAc-T10) [Source:HGNC Symbol;Acc:19873]
AML1.Control-6.smooth.chr5.cher66	Control	5	156490700	156491200	AML1.Control-6 smooth	1.10879	0.776787	HAVCR1	26762	ENSG00000113249	156456424	156486130	-1	protein_coding	hepatitis A virus cellular receptor 1 [Source:HGNC Symbol;Acc:17866]
AML1.Control-6.smooth.chr5.cher67	Control	5	156690138	156690644	AML1.Control-6 smooth	2.0708	4.47771	CYFIP2	26999	ENSG00000055163	156693089	156822606	1	protein_coding	cytoplasmic FMR1 interacting protein 2 [Source:HGNC Symbol;Acc:13760]
AML1.Control-6.smooth.chr5.cher67	Control	5	156690138	156690644	AML1.Control-6 smooth	2.0708	4.47771	CTC-248O19.1	NA	ENSG00000253653	156687132	156693635	-1	antisense
AML1.Control-6.smooth.chr5.cher68	Control	5	159519380	159519991	AML1.Control-6 smooth	1.15875	0.345397	PWWP2A	114825	ENSG00000170234	159488808	159546430	-1	protein_coding	PWWP domain containing 2A [Source:HGNC Symbol;Acc:29406]
AML1.Control-6.smooth.chr5.cher69	Control	5	159796567	159797066	AML1.Control-6 smooth	1.20457	0.774699	C1QTNF2	114898	ENSG00000145861	159774758	159797648	-1	protein_coding	C1q and tumor necrosis factor related protein 2 [Source:HGNC Symbol;Acc:14325]
AML1.Control-6.smooth.chr5.cher70	Control	5	168725108	168725935	AML1.Control-6 smooth	1.31783	2.14649	SLIT3	6586	ENSG00000184347	168088745	168728133	-1	protein_coding	slit homolog 3 (Drosophila) [Source:HGNC Symbol;Acc:11087]
AML1.Control-6.smooth.chr5.cher71	Control	5	172384126	172384706	AML1.Control-6 smooth	1.36929	1.37581	RPL26L1	51121	ENSG00000037241	172385732	172396774	1	protein_coding	ribosomal protein L26-like 1 [Source:HGNC Symbol;Acc:17050]
AML1.Control-6.smooth.chr5.cher71	Control	5	172384126	172384706	AML1.Control-6 smooth	1.36929	1.37581	CTC-308K20.1	100268168	ENSG00000204758	172381789	172386395	-1	lincRNA
AML1.Control-6.smooth.chr5.cher72	Control	5	175301658	175302230	AML1.Control-6 smooth	1.48627	2.72253	CPLX2	10814	ENSG00000145920	175223313	175311023	1	protein_coding	complexin 2 [Source:HGNC Symbol;Acc:2310]
AML1.Control-6.smooth.chr5.cher73	Control	5	176776678	176777204	AML1.Control-6 smooth	1.07206	0.464715	LMAN2	10960	ENSG00000169223	176758563	176778853	-1	protein_coding	lectin, mannose-binding 2 [Source:HGNC Symbol;Acc:16986]
AML1.Control-6.smooth.chr5.cher74	Control	5	178288352	178289156	AML1.Control-6 smooth	1.43612	2.86065	ZNF354B	117608	ENSG00000178338	178286954	178315123	1	protein_coding	zinc finger protein 354B [Source:HGNC Symbol;Acc:17197]
AML1.Control-6.smooth.chr6.cher1	Control	6	2846836	2847454	AML1.Control-6 smooth	1.59445	3.35684	SERPINB1	1992	ENSG00000021355	2832566	2842240	-1	protein_coding	serpin peptidase inhibitor, clade B (ovalbumin), member 1 [Source:HGNC Symbol;Acc:3311]
AML1.Control-6.smooth.chr6.cher2	Control	6	2960984	2961486	AML1.Control-6 smooth	1.29492	1.6251	SERPINB6	5269	ENSG00000124570	2948393	2972399	-1	protein_coding	serpin peptidase inhibitor, clade B (ovalbumin), member 6 [Source:HGNC Symbol;Acc:8950]
AML1.Control-6.smooth.chr6.cher3	Control	6	2986804	2987324	AML1.Control-6 smooth	1.73035	3.41099	RP1-90J20.7	401232	ENSG00000244041	2988201	2991400	1	processed_transcript
AML1.Control-6.smooth.chr6.cher3	Control	6	2986804	2987324	AML1.Control-6 smooth	1.73035	3.41099	NQO2	4835	ENSG00000124588	2988221	3019996	1	protein_coding	NAD(P)H dehydrogenase, quinone 2 [Source:HGNC Symbol;Acc:7856]
AML1.Control-6.smooth.chr6.cher4	Control	6	3112137	3112742	AML1.Control-6 smooth	1.30605	1.1059	BPHL	670	ENSG00000137274	3118608	3153812	1	protein_coding	biphenyl hydrolase-like (serine hydrolase) [Source:HGNC Symbol;Acc:1094]
AML1.Control-6.smooth.chr6.cher5	Control	6	3257152	3257628	AML1.Control-6 smooth	1.05771	0.395097	PSMG4	389362	ENSG00000180822	3231637	3303607	1	protein_coding	proteasome (prosome, macropain) assembly chaperone 4 [Source:HGNC Symbol;Acc:21108]
AML1.Control-6.smooth.chr6.cher6	Control	6	6327127	6327750	AML1.Control-6 smooth	1.23682	1.12396	F13A1	2162	ENSG00000124491	6144318	6321246	-1	protein_coding	coagulation factor XIII, A1 polypeptide [Source:HGNC Symbol;Acc:3531]
AML1.Control-6.smooth.chr6.cher7	Control	6	7914093	7915620	AML1.Control-6 smooth	1.60018	4.31212	TXNDC5	81567	ENSG00000239264	7881483	8026646	-1	protein_coding	thioredoxin domain containing 5 (endoplasmic reticulum) [Source:HGNC Symbol;Acc:21073]
AML1.Control-6.smooth.chr6.cher8	Control	6	11043137	11043734	AML1.Control-6 smooth	1.27799	1.55505	RP1-62D2.3	100506409	ENSG00000230314	11043993	11078459	1	lincRNA
AML1.Control-6.smooth.chr6.cher8	Control	6	11043137	11043734	AML1.Control-6 smooth	1.27799	1.55505	ELOVL2	54898	ENSG00000197977	10980992	11044547	-1	protein_coding	ELOVL fatty acid elongase 2 [Source:HGNC Symbol;Acc:14416]
AML1.Control-6.smooth.chr6.cher11	Control	6	15664140	15664865	AML1.Control-6 smooth	1.22136	1.21595	DTNBP1	84062	ENSG00000047579	15523032	15663289	-1	protein_coding	dystrobrevin binding protein 1 [Source:HGNC Symbol;Acc:17328]
AML1.Control-6.smooth.chr6.cher12	Control	6	24663046	24663621	AML1.Control-6 smooth	1.2357	1.23602	TDP2	51567	ENSG00000111802	24650205	24667261	-1	protein_coding	tyrosyl-DNA phosphodiesterase 2 [Source:HGNC Symbol;Acc:17768]
AML1.Control-6.smooth.chr6.cher12	Control	6	24663046	24663621	AML1.Control-6 smooth	1.2357	1.23602	ACOT13	55856	ENSG00000112304	24667263	24705293	1	protein_coding	acyl-CoA thioesterase 13 [Source:HGNC Symbol;Acc:20999]
AML1.Control-6.smooth.chr6.cher13	Control	6	25936914	25937401	AML1.Control-6 smooth	1.25879	1.22386	SLC17A2	10246	ENSG00000112337	25912982	25930946	-1	protein_coding	solute carrier family 17 (sodium phosphate), member 2 [Source:HGNC Symbol;Acc:10930]
AML1.Control-6.smooth.chr6.cher14	Control	6	26016966	26017468	AML1.Control-6 smooth	1.08837	0.551927	HIST1H3A	8968	ENSG00000198366	26020718	26021186	1	protein_coding	histone cluster 1, H3a [Source:HGNC Symbol;Acc:4766]
AML1.Control-6.smooth.chr6.cher14	Control	6	26016966	26017468	AML1.Control-6 smooth	1.08837	0.551927	HIST1H4A	554313	ENSG00000196176	26021907	26044555	1	protein_coding	histone cluster 1, H4a [Source:HGNC Symbol;Acc:4781]
AML1.Control-6.smooth.chr6.cher15	Control	6	28323612	28324086	AML1.Control-6 smooth	1.12129	0.678447	ZNF323	64288	ENSG00000235109	28292470	28324048	-1	protein_coding	zinc finger protein 323 [Source:HGNC Symbol;Acc:14097]
AML1.Control-6.smooth.chr6.cher15	Control	6	28323612	28324086	AML1.Control-6 smooth	1.12129	0.678447	ZKSCAN3	80317	ENSG00000189298	28317691	28335336	1	protein_coding	zinc finger with KRAB and SCAN domains 3 [Source:HGNC Symbol;Acc:13853]
AML1.Control-6.smooth.chr6.cher16	Control	6	28368470	28368935	AML1.Control-6 smooth	1.09168	0.340735	ZSCAN12	9753	ENSG00000158691	28346732	28367511	-1	protein_coding	zinc finger and SCAN domain containing 12 [Source:HGNC Symbol;Acc:13172]
AML1.Control-6.smooth.chr6.cher17	Control	6	29427260	29427958	AML1.Control-6 smooth	1.30436	1.14186	OR11A1	26531	ENSG00000204694	29393281	29424848	-1	protein_coding	olfactory receptor, family 11, subfamily A, member 1 [Source:HGNC Symbol;Acc:8176]
AML1.Control-6.smooth.chr6.cher17	Control	6	29427260	29427958	AML1.Control-6 smooth	1.30436	1.14186	OR2H1	26716	ENSG00000204688	29424958	29432105	1	protein_coding	olfactory receptor, family 2, subfamily H, member 1 [Source:HGNC Symbol;Acc:8252]
AML1.Control-6.smooth.chr6.cher18	Control	6	30849200	30849786	AML1.Control-6 smooth	1.75945	4.32446	TIGD1L	NA	ENSG00000237775	30834759	30843695	-1	antisense	tigger transposable element derived 1-like [Source:HGNC Symbol;Acc:28694]
AML1.Control-6.smooth.chr6.cher18	Control	6	30849200	30849786	AML1.Control-6 smooth	1.75945	4.32446	DDR1	100616237	ENSG00000204580	30844198	30867933	1	protein_coding	discoidin domain receptor tyrosine kinase 1 [Source:HGNC Symbol;Acc:2730]
AML1.Control-6.smooth.chr6.cher19	Control	6	30921948	30922554	AML1.Control-6 smooth	1.07206	0.55488	HCG21	NA	ENSG00000233529	30913756	30922639	-1	antisense	HLA complex group 21 (non-protein coding) [Source:HGNC Symbol;Acc:31335]
AML1.Control-6.smooth.chr6.cher20	Control	6	31577666	31578170	AML1.Control-6 smooth	1.0474	0.379763	AIF1	199	ENSG00000204472	31582961	31584798	1	protein_coding	allograft inflammatory factor 1 [Source:HGNC Symbol;Acc:352]
AML1.Control-6.smooth.chr6.cher21	Control	6	31681938	31682442	AML1.Control-6 smooth	1.58485	3.59947	LY6G6E	NA	ENSG00000204422	31654739	31681849	-1	processed_transcript	lymphocyte antigen 6 complex, locus G6E (pseudogene) [Source:HGNC Symbol;Acc:13934]
AML1.Control-6.smooth.chr6.cher21	Control	6	31681938	31682442	AML1.Control-6 smooth	1.58485	3.59947	LY6G6E	NA	ENSG00000255552	31679548	31681842	-1	protein_coding	Lymphocyte antigen 6 complex, locus G6E; Lymphocyte antigen 6 complex, locus G6E, isoform CRA_a; Uncharacterized protein [Source:UniProtKB/TrEMBL;Acc:A2ABS3]
AML1.Control-6.smooth.chr6.cher21	Control	6	31681938	31682442	AML1.Control-6 smooth	1.58485	3.59947	LY6G6D	259215	ENSG00000244355	31683133	31685581	1	protein_coding	lymphocyte antigen 6 complex, locus G6D [Source:HGNC Symbol;Acc:13935]
AML1.Control-6.smooth.chr6.cher21	Control	6	31681938	31682442	AML1.Control-6 smooth	1.58485	3.59947	C6orf25	80739	ENSG00000204420	31686371	31694491	1	protein_coding	chromosome 6 open reading frame 25 [Source:HGNC Symbol;Acc:13937]
AML1.Control-6.smooth.chr6.cher22	Control	6	31934295	31934980	AML1.Control-6 smooth	1.39857	1.83307	SKIV2L	6499	ENSG00000204351	31926857	31937532	1	protein_coding	superkiller viralicidic activity 2-like (S. cerevisiae) [Source:HGNC Symbol;Acc:10898]
AML1.Control-6.smooth.chr6.cher22	Control	6	31934295	31934980	AML1.Control-6 smooth	1.39857	1.83307	STK19	8859	ENSG00000204344	31938868	31949228	1	protein_coding	serine/threonine kinase 19 [Source:HGNC Symbol;Acc:11398]
AML1.Control-6.smooth.chr6.cher22	Control	6	31934295	31934980	AML1.Control-6 smooth	1.39857	1.83307	XXbac-BPG116M5.15	NA	ENSG00000254729	31940158	31950598	1	protein_coding	Serine/threonine kinase 19 [Source:UniProtKB/TrEMBL;Acc:H0YAS4]
AML1.Control-6.smooth.chr6.cher23	Control	6	32376858	32377328	AML1.Control-6 smooth	1.18073	0.822347	BTNL2	56244	ENSG00000204290	32359241	32379511	-1	protein_coding	butyrophilin-like 2 (MHC class II associated) [Source:HGNC Symbol;Acc:1142]
AML1.Control-6.smooth.chr6.cher24	Control	6	34858258	34858762	AML1.Control-6 smooth	1.44342	2.22575	TAF11	6882	ENSG00000064995	34845555	34855866	-1	protein_coding	TAF11 RNA polymerase II, TATA box binding protein (TBP)-associated factor, 28kDa [Source:HGNC Symbol;Acc:11544]
AML1.Control-6.smooth.chr6.cher24	Control	6	34858258	34858762	AML1.Control-6 smooth	1.44342	2.22575	ANKS1A	23294	ENSG00000064999	34857038	35085317	1	protein_coding	ankyrin repeat and sterile alpha motif domain containing 1A [Source:HGNC Symbol;Acc:20961]
AML1.Control-6.smooth.chr6.cher25	Control	6	35175890	35176866	AML1.Control-6 smooth	1.34701	2.39096	SCUBE3	222663	ENSG00000146197	35182190	35220856	1	protein_coding	signal peptide, CUB domain, EGF-like 3 [Source:HGNC Symbol;Acc:13655]
AML1.Control-6.smooth.chr6.cher26	Control	6	35739516	35740150	AML1.Control-6 smooth	1.45155	2.67339	CLPSL2	389383	ENSG00000196748	35744371	35747329	1	protein_coding	colipase-like 2 [Source:HGNC Symbol;Acc:21250]
AML1.Control-6.smooth.chr6.cher27	Control	6	38148630	38149136	AML1.Control-6 smooth	1.09662	0.693695	RP3-322I12.2	NA	ENSG00000225874	38141449	38145069	-1	processed_transcript
AML1.Control-6.smooth.chr6.cher28	Control	6	39286116	39286708	AML1.Control-6 smooth	1.34836	1.91798	KCNK17	89822	ENSG00000124780	39266777	39282329	-1	protein_coding	potassium channel, subfamily K, member 17 [Source:HGNC Symbol;Acc:14465]
AML1.Control-6.smooth.chr6.cher29	Control	6	39756993	39757502	AML1.Control-6 smooth	1.30229	1.73196	DAAM2	23500	ENSG00000146122	39760142	39872648	1	protein_coding	dishevelled associated activator of morphogenesis 2 [Source:HGNC Symbol;Acc:18143]
AML1.Control-6.smooth.chr6.cher30	Control	6	41034233	41034922	AML1.Control-6 smooth	1.26341	1.53376	NFYA	4800	ENSG00000001167	41040684	41067715	1	protein_coding	nuclear transcription factor Y, alpha [Source:HGNC Symbol;Acc:7804]
AML1.Control-6.smooth.chr6.cher35	Control	6	41629482	41630162	AML1.Control-6 smooth	1.15522	0.808373	RP4-696P19.2	NA	ENSG00000230913	41634644	41635387	1	pseudogene
AML1.Control-6.smooth.chr6.cher36	Control	6	42528316	42529081	AML1.Control-6 smooth	1.09674	0.8596	UBR2	23304	ENSG00000024048	42531800	42661242	1	protein_coding	ubiquitin protein ligase E3 component n-recognin 2 [Source:HGNC Symbol;Acc:21289]
AML1.Control-6.smooth.chr6.cher37	Control	6	42985350	42986040	AML1.Control-6 smooth	1.40848	2.71565	MEA1	4201	ENSG00000124733	42979832	42981706	-1	protein_coding	male-enhanced antigen 1 [Source:HGNC Symbol;Acc:6986]
AML1.Control-6.smooth.chr6.cher37	Control	6	42985350	42986040	AML1.Control-6 smooth	1.40848	2.71565	RRP36	88745	ENSG00000124541	42989383	42997335	1	protein_coding	ribosomal RNA processing 36 homolog (S. cerevisiae) [Source:HGNC Symbol;Acc:21374]
AML1.Control-6.smooth.chr6.cher37	Control	6	42985350	42986040	AML1.Control-6 smooth	1.40848	2.71565	KLHDC3	116138	ENSG00000124702	42981951	42989036	1	protein_coding	kelch domain containing 3 [Source:HGNC Symbol;Acc:20704]
AML1.Control-6.smooth.chr6.cher38	Control	6	43023696	43024212	AML1.Control-6 smooth	1.11234	0.603909	CUL7	9820	ENSG00000044090	43005355	43021683	-1	protein_coding	cullin 7 [Source:HGNC Symbol;Acc:21024]
AML1.Control-6.smooth.chr6.cher38	Control	6	43023696	43024212	AML1.Control-6 smooth	1.11234	0.603909	KLC4	89953	ENSG00000137171	43008515	43042837	1	protein_coding	kinesin light chain 4 [Source:HGNC Symbol;Acc:21624]
AML1.Control-6.smooth.chr6.cher38	Control	6	43023696	43024212	AML1.Control-6 smooth	1.11234	0.603909	MRPL2	51069	ENSG00000112651	43021767	43027544	-1	protein_coding	mitochondrial ribosomal protein L2 [Source:HGNC Symbol;Acc:14056]
AML1.Control-6.smooth.chr6.cher39	Control	6	43429710	43430620	AML1.Control-6 smooth	1.28068	2.38883	DLK2	65989	ENSG00000171462	43418090	43424370	-1	protein_coding	delta-like 2 homolog (Drosophila) [Source:HGNC Symbol;Acc:21113]
AML1.Control-6.smooth.chr6.cher40	Control	6	43493604	43494514	AML1.Control-6 smooth	1.33472	2.71824	XPO5	57510	ENSG00000124571	43490072	43543812	-1	protein_coding	exportin 5 [Source:HGNC Symbol;Acc:17675]
AML1.Control-6.smooth.chr6.cher41	Control	6	43540193	43541294	AML1.Control-6 smooth	1.49411	4.72908	POLH	5429	ENSG00000170734	43543887	43586701	1	protein_coding	polymerase (DNA directed), eta [Source:HGNC Symbol;Acc:9181]
AML1.Control-6.smooth.chr6.cher41	Control	6	43540193	43541294	AML1.Control-6 smooth	1.49411	4.72908	XPO5	57510	ENSG00000124571	43490072	43543812	-1	protein_coding	exportin 5 [Source:HGNC Symbol;Acc:17675]
AML1.Control-6.smooth.chr6.cher42	Control	6	43733496	43734376	AML1.Control-6 smooth	1.69163	4.10758	VEGFA	7422	ENSG00000112715	43737921	43754224	1	protein_coding	vascular endothelial growth factor A [Source:HGNC Symbol;Acc:12680]
AML1.Control-6.smooth.chr6.cher43	Control	6	46293256	46294048	AML1.Control-6 smooth	1.15855	1.19539	RCAN2	10231	ENSG00000172348	46188475	46459709	-1	protein_coding	regulator of calcineurin 2 [Source:HGNC Symbol;Acc:3041]
AML1.Control-6.smooth.chr6.cher44	Control	6	52744332	52745310	AML1.Control-6 smooth	1.52766	4.22078	RP11-392A23.5	NA	ENSG00000230845	52737812	52744738	-1	pseudogene
AML1.Control-6.smooth.chr6.cher46	Control	6	69349688	69350391	AML1.Control-6 smooth	1.36691	2.46573	RP3-525N10.2	NA	ENSG00000230910	69342555	69344216	-1	antisense
AML1.Control-6.smooth.chr6.cher48	Control	6	73327494	73328190	AML1.Control-6 smooth	1.05694	0.39599	KCNQ5	56479	ENSG00000185760	73331520	73908574	1	protein_coding	potassium voltage-gated channel, KQT-like subfamily, member 5 [Source:HGNC Symbol;Acc:6299]
AML1.Control-6.smooth.chr6.cher50	Control	6	73750990	73751490	AML1.Control-6 smooth	1.00773	0.157346	KCNQ5	56479	ENSG00000185760	73331520	73908574	1	protein_coding	potassium voltage-gated channel, KQT-like subfamily, member 5 [Source:HGNC Symbol;Acc:6299]
AML1.Control-6.smooth.chr6.cher51	Control	6	82960834	82961333	AML1.Control-6 smooth	1.03363	0.298607	IBTK	25998	ENSG00000005700	82879700	82957471	-1	protein_coding	inhibitor of Bruton agammaglobulinemia tyrosine kinase [Source:HGNC Symbol;Acc:17853]
AML1.Control-6.smooth.chr6.cher52	Control	6	88412190	88412695	AML1.Control-6 smooth	1.18313	0.584456	AKIRIN2	55122	ENSG00000135334	88384790	88411927	-1	protein_coding	akirin 2 [Source:HGNC Symbol;Acc:21407]
AML1.Control-6.smooth.chr6.cher53	Control	6	90059743	90060231	AML1.Control-6 smooth	1.07438	0.199009	UBE2J1	51465	ENSG00000198833	90036344	90062567	-1	protein_coding	ubiquitin-conjugating enzyme E2, J1, U [Source:HGNC Symbol;Acc:17598]
AML1.Control-6.smooth.chr6.cher54	Control	6	90527104	90527596	AML1.Control-6 smooth	1.05711	0.363366	snoU13	NA	ENSG00000238747	90533014	90533115	1	snoRNA	Small nucleolar RNA U13 [Source:RFAM;Acc:RF01210]
AML1.Control-6.smooth.chr6.cher54	Control	6	90527104	90527596	AML1.Control-6 smooth	1.05711	0.363366	MDN1	23195	ENSG00000112159	90352218	90529442	-1	protein_coding	MDN1, midasin homolog (yeast) [Source:HGNC Symbol;Acc:18302]
AML1.Control-6.smooth.chr6.cher55	Control	6	99790540	99791004	AML1.Control-6 smooth	1.05425	0.30497	FAXC	84553	ENSG00000146267	99728536	99797938	-1	protein_coding	failed axon connections homolog (Drosophila) [Source:HGNC Symbol;Acc:20742]
AML1.Control-6.smooth.chr6.cher56	Control	6	105851918	105853618	AML1.Control-6 smooth	1.36523	5.24285	PREP	5550	ENSG00000085377	105725440	105850959	-1	protein_coding	prolyl endopeptidase [Source:HGNC Symbol;Acc:9358]
AML1.Control-6.smooth.chr6.cher58	Control	6	109162763	109163258	AML1.Control-6 smooth	1.38142	2.19796	ARMC2	84071	ENSG00000118690	109169619	109295186	1	protein_coding	armadillo repeat containing 2 [Source:HGNC Symbol;Acc:23045]
AML1.Control-6.smooth.chr6.cher59	Control	6	112375132	112375726	AML1.Control-6 smooth	1.06527	0.485189	WISP3	8838	ENSG00000112761	112375275	112392171	1	protein_coding	WNT1 inducible signaling pathway protein 3 [Source:HGNC Symbol;Acc:12771]
AML1.Control-6.smooth.chr6.cher60	Control	6	125623742	125624218	AML1.Control-6 smooth	1.21278	1.11944	HDDC2	51020	ENSG00000111906	125596496	125623282	-1	protein_coding	HD domain containing 2 [Source:HGNC Symbol;Acc:21078]
AML1.Control-6.smooth.chr6.cher61	Control	6	130752208	130753120	AML1.Control-6 smooth	1.73898	5.27648	TMEM200A	114801	ENSG00000164484	130686879	130764208	1	protein_coding	transmembrane protein 200A [Source:HGNC Symbol;Acc:21075]
AML1.Control-6.smooth.chr6.cher63	Control	6	135819604	135820512	AML1.Control-6 smooth	1.36404	3.11483	AHI1	54806	ENSG00000135541	135604670	135830219	-1	protein_coding	Abelson helper integration site 1 [Source:HGNC Symbol;Acc:21575]
AML1.Control-6.smooth.chr6.cher63	Control	6	135819604	135820512	AML1.Control-6 smooth	1.36404	3.11483	RP11-94K8.1	100131814	ENSG00000231028	135818489	135842287	1	lincRNA
AML1.Control-6.smooth.chr6.cher64	Control	6	138192795	138193304	AML1.Control-6 smooth	1.20157	1.13616	RP11-356I2.4	100130476	ENSG00000237499	138178423	138188841	-1	lincRNA
AML1.Control-6.smooth.chr6.cher64	Control	6	138192795	138193304	AML1.Control-6 smooth	1.20157	1.13616	TNFAIP3	7128	ENSG00000118503	138188351	138204449	1	protein_coding	tumor necrosis factor, alpha-induced protein 3 [Source:HGNC Symbol;Acc:11896]
AML1.Control-6.smooth.chr6.cher65	Control	6	138540452	138541060	AML1.Control-6 smooth	1.12315	0.681916	PBOV1	59351	ENSG00000254440	138537123	138539628	-1	protein_coding	prostate and breast cancer overexpressed 1 [Source:HGNC Symbol;Acc:21079]
AML1.Control-6.smooth.chr6.cher66	Control	6	143659284	143659982	AML1.Control-6 smooth	1.49569	1.97643	RP1-95L4.4	NA	ENSG00000217648	143663383	143664520	1	pseudogene
AML1.Control-6.smooth.chr6.cher67	Control	6	143761964	143762444	AML1.Control-6 smooth	1.14211	0.585816	ADAT2	134637	ENSG00000189007	143747078	143771810	-1	protein_coding	adenosine deaminase, tRNA-specific 2 [Source:HGNC Symbol;Acc:21172]
AML1.Control-6.smooth.chr6.cher68	Control	6	144468106	144468902	AML1.Control-6 smooth	1.39921	2.65787	STX11	8676	ENSG00000135604	144471663	144509507	1	protein_coding	syntaxin 11 [Source:HGNC Symbol;Acc:11429]
AML1.Control-6.smooth.chr6.cher69	Control	6	147830887	147831486	AML1.Control-6 smooth	1.2311	1.36607	SAMD5	389432	ENSG00000203727	147830063	148058683	1	protein_coding	sterile alpha motif domain containing 5 [Source:HGNC Symbol;Acc:21180]
AML1.Control-6.smooth.chr6.cher71	Control	6	153066694	153067264	AML1.Control-6 smooth	1.48113	2.79111	VIP	7432	ENSG00000146469	153071933	153080900	1	protein_coding	vasoactive intestinal peptide [Source:HGNC Symbol;Acc:12693]
AML1.Control-6.smooth.chr6.cher72	Control	6	155539228	155539928	AML1.Control-6 smooth	1.30785	2.13213	TIAM2	26230	ENSG00000146426	155153831	155578857	1	protein_coding	T-cell lymphoma invasion and metastasis 2 [Source:HGNC Symbol;Acc:11806]
AML1.Control-6.smooth.chr6.cher73	Control	6	159592078	159592658	AML1.Control-6 smooth	1.21917	0.99092	FNDC1	84624	ENSG00000164694	159590429	159693141	1	protein_coding	fibronectin type III domain containing 1 [Source:HGNC Symbol;Acc:21184]
AML1.Control-6.smooth.chr6.cher76	Control	6	160460564	160461278	AML1.Control-6 smooth	1.37447	2.45245	IGF2R	3482	ENSG00000197081	160390131	160534539	1	protein_coding	insulin-like growth factor 2 receptor [Source:HGNC Symbol;Acc:5467]
AML1.Control-6.smooth.chr6.cher77	Control	6	160766552	160767150	AML1.Control-6 smooth	1.4143	2.33889	SLC22A3	6581	ENSG00000146477	160769300	160876014	1	protein_coding	solute carrier family 22 (extraneuronal monoamine transporter), member 3 [Source:HGNC Symbol;Acc:10967]
AML1.Control-6.smooth.chr6.cher78	Control	6	163149302	163149822	AML1.Control-6 smooth	1.49117	2.48155	PARK2	5071	ENSG00000185345	161768452	163148803	-1	protein_coding	parkinson protein 2, E3 ubiquitin protein ligase (parkin) [Source:HGNC Symbol;Acc:8607]
AML1.Control-6.smooth.chr6.cher78	Control	6	163149302	163149822	AML1.Control-6 smooth	1.49117	2.48155	PACRG	135138	ENSG00000112530	163148164	163736524	1	protein_coding	PARK2 co-regulated [Source:HGNC Symbol;Acc:19152]
AML1.Control-6.smooth.chr6.cher79	Control	6	167275102	167275808	AML1.Control-6 smooth	1.4081	2.54653	RPS6KA2	6196	ENSG00000071242	166822852	167319939	-1	protein_coding	ribosomal protein S6 kinase, 90kDa, polypeptide 2 [Source:HGNC Symbol;Acc:10431]
AML1.Control-6.smooth.chr7.cher1	Control	7	20258672	20259144	AML1.Control-6 smooth	1.0602	0.400114	MACC1	346389	ENSG00000183742	20176020	20257027	-1	protein_coding	metastasis associated in colon cancer 1 [Source:HGNC Symbol;Acc:30215]
AML1.Control-6.smooth.chr7.cher1	Control	7	20258672	20259144	AML1.Control-6 smooth	1.0602	0.400114	AC005083.1	100506098	ENSG00000233834	20257200	20261323	1	lincRNA
AML1.Control-6.smooth.chr7.cher2	Control	7	22762866	22763660	AML1.Control-6 smooth	1.36299	2.56845	IL6	3569	ENSG00000136244	22765503	22771621	1	protein_coding	interleukin 6 (interferon, beta 2) [Source:HGNC Symbol;Acc:6018]
AML1.Control-6.smooth.chr7.cher5	Control	7	30813862	30814362	AML1.Control-6 smooth	1.24833	1.49099	FAM188B	84182	ENSG00000106125	30811033	30932002	1	protein_coding	family with sequence similarity 188, member B [Source:HGNC Symbol;Acc:21916]
AML1.Control-6.smooth.chr7.cher6	Control	7	33151528	33152128	AML1.Control-6 smooth	1.16567	0.488307	RP9	6100	ENSG00000164610	33134409	33149013	-1	protein_coding	retinitis pigmentosa 9 (autosomal dominant) [Source:HGNC Symbol;Acc:10288]
AML1.Control-6.smooth.chr7.cher7	Control	7	38358016	38358740	AML1.Control-6 smooth	1.01299	0.192853	TRGV9	NA	ENSG00000211695	38356618	38358462	-1	TR_V_gene	T cell receptor gamma variable 9 [Source:HGNC Symbol;Acc:12295]
AML1.Control-6.smooth.chr7.cher8	Control	7	43158624	43159718	AML1.Control-6 smooth	1.92508	8.35807	HECW1-IT1	NA	ENSG00000181211	43157495	43202786	1	sense_intronic	HECW1 intronic transcript 1 (non-protein coding) [Source:HGNC Symbol;Acc:41465]
AML1.Control-6.smooth.chr7.cher9	Control	7	44160568	44161058	AML1.Control-6 smooth	1.51941	2.81643	POLD2	5425	ENSG00000106628	44154286	44163957	-1	protein_coding	polymerase (DNA directed), delta 2, regulatory subunit 50kDa [Source:HGNC Symbol;Acc:9176]
AML1.Control-6.smooth.chr7.cher10	Control	7	45067212	45067738	AML1.Control-6 smooth	0.994516	0.0590798	CCM2	83605	ENSG00000136280	45039074	45116068	1	protein_coding	cerebral cavernous malformation 2 [Source:HGNC Symbol;Acc:21708]
AML1.Control-6.smooth.chr7.cher11	Control	7	47836647	47837126	AML1.Control-6 smooth	1.3145	1.82293	C7orf69	80099	ENSG00000136275	47834889	47859428	1	protein_coding	chromosome 7 open reading frame 69 [Source:HGNC Symbol;Acc:21911]
AML1.Control-6.smooth.chr7.cher12	Control	7	47991187	47991766	AML1.Control-6 smooth	1.1868	0.875751	AC069282.6	NA	ENSG00000225507	47996390	47996915	1	pseudogene
AML1.Control-6.smooth.chr7.cher12	Control	7	47991187	47991766	AML1.Control-6 smooth	1.1868	0.875751	PKD1L1	168507	ENSG00000158683	47814250	47988088	-1	protein_coding	polycystic kidney disease 1 like 1 [Source:HGNC Symbol;Acc:18053]
AML1.Control-6.smooth.chr7.cher13	Control	7	55980062	55980689	AML1.Control-6 smooth	1.53844	3.39554	ZNF713	349075	ENSG00000178665	55955169	56009918	1	protein_coding	zinc finger protein 713 [Source:HGNC Symbol;Acc:22043]
AML1.Control-6.smooth.chr7.cher14	Control	7	75674620	75675408	AML1.Control-6 smooth	1.73719	4.24118	MDH2	4191	ENSG00000146701	75677369	75696826	1	protein_coding	malate dehydrogenase 2, NAD (mitochondrial) [Source:HGNC Symbol;Acc:6971]
AML1.Control-6.smooth.chr7.cher14	Control	7	75674620	75675408	AML1.Control-6 smooth	1.73719	4.24118	STYXL1	51657	ENSG00000127952	75625656	75677322	-1	protein_coding	serine/threonine/tyrosine interacting-like 1 [Source:HGNC Symbol;Acc:18165]
AML1.Control-6.smooth.chr7.cher15	Control	7	77321516	77321996	AML1.Control-6 smooth	1.28317	1.82308	RSBN1L	222194	ENSG00000187257	77325760	77409008	1	protein_coding	round spermatid basic protein 1-like [Source:HGNC Symbol;Acc:24765]
AML1.Control-6.smooth.chr7.cher16	Control	7	86970518	86971322	AML1.Control-6 smooth	1.189	1.36184	CROT	54677	ENSG00000005469	86974997	87029111	1	protein_coding	carnitine O-octanoyltransferase [Source:HGNC Symbol;Acc:2366]
AML1.Control-6.smooth.chr7.cher22	Control	7	91876581	91877413	AML1.Control-6 smooth	1.07161	0.32157	KRIT1	889	ENSG00000001631	91828283	91875480	-1	protein_coding	KRIT1, ankyrin repeat containing [Source:HGNC Symbol;Acc:1573]
AML1.Control-6.smooth.chr7.cher22	Control	7	91876581	91877413	AML1.Control-6 smooth	1.07161	0.32157	ANKIB1	54467	ENSG00000001629	91875548	92030698	1	protein_coding	ankyrin repeat and IBR domain containing 1 [Source:HGNC Symbol;Acc:22215]
AML1.Control-6.smooth.chr7.cher23	Control	7	92075652	92076120	AML1.Control-6 smooth	1.57205	2.95794	AC007566.11	NA	ENSG00000230927	92042290	92068876	-1	pseudogene
AML1.Control-6.smooth.chr7.cher23	Control	7	92075652	92076120	AML1.Control-6 smooth	1.57205	2.95794	GATAD1	57798	ENSG00000157259	92076767	92088150	1	protein_coding	GATA zinc finger domain containing 1 [Source:HGNC Symbol;Acc:29941]
AML1.Control-6.smooth.chr7.cher24	Control	7	93522794	93523592	AML1.Control-6 smooth	1.20008	1.7828	TFPI2	7980	ENSG00000105825	93514709	93520303	-1	protein_coding	tissue factor pathway inhibitor 2 [Source:HGNC Symbol;Acc:11761]
AML1.Control-6.smooth.chr7.cher25	Control	7	95851020	95851536	AML1.Control-6 smooth	1.03564	0.0804039	MIR591	693176	ENSG00000208025	95848974	95849068	-1	miRNA	microRNA 591 [Source:HGNC Symbol;Acc:32847]
AML1.Control-6.smooth.chr7.cher26	Control	7	96136708	96137193	AML1.Control-6 smooth	1.16731	0.788518	SHFM1	7979	ENSG00000127922	96110938	96339203	-1	protein_coding	split hand/foot malformation (ectrodactyly) type 1 [Source:HGNC Symbol;Acc:10845]
AML1.Control-6.smooth.chr7.cher26	Control	7	96136708	96137193	AML1.Control-6 smooth	1.16731	0.788518	AC092031.1	401388	ENSG00000197851	96110938	96132835	-1	protein_coding
AML1.Control-6.smooth.chr7.cher27	Control	7	97931456	97931950	AML1.Control-6 smooth	1.38814	1.90291	BRI3	25798	ENSG00000164713	97881691	97937162	1	protein_coding	brain protein I3 [Source:HGNC Symbol;Acc:1109]
AML1.Control-6.smooth.chr7.cher28	Control	7	97935052	97935732	AML1.Control-6 smooth	1.59275	3.31193	BRI3	25798	ENSG00000164713	97881691	97937162	1	protein_coding	brain protein I3 [Source:HGNC Symbol;Acc:1109]
AML1.Control-6.smooth.chr7.cher28	Control	7	97935052	97935732	AML1.Control-6 smooth	1.59275	3.31193	BAIAP2L1	55971	ENSG00000006453	97920963	98030380	-1	protein_coding	BAI1-associated protein 2-like 1 [Source:HGNC Symbol;Acc:21649]
AML1.Control-6.smooth.chr7.cher29	Control	7	97941440	97941942	AML1.Control-6 smooth	1.176	0.224873	BAIAP2L1	55971	ENSG00000006453	97920963	98030380	-1	protein_coding	BAI1-associated protein 2-like 1 [Source:HGNC Symbol;Acc:21649]
AML1.Control-6.smooth.chr7.cher30	Control	7	99696094	99696988	AML1.Control-6 smooth	1.37018	3.50542	MCM7	4176	ENSG00000166508	99690351	99699563	-1	protein_coding	minichromosome maintenance complex component 7 [Source:HGNC Symbol;Acc:6950]
AML1.Control-6.smooth.chr7.cher30	Control	7	99696094	99696988	AML1.Control-6 smooth	1.37018	3.50542	AP4M1	9179	ENSG00000221838	99699172	99707968	1	protein_coding	adaptor-related protein complex 4, mu 1 subunit [Source:HGNC Symbol;Acc:574]
AML1.Control-6.smooth.chr7.cher30	Control	7	99696094	99696988	AML1.Control-6 smooth	1.37018	3.50542	MIR25	407014	ENSG00000207547	99691183	99691266	-1	miRNA	microRNA 25 [Source:HGNC Symbol;Acc:31609]
AML1.Control-6.smooth.chr7.cher30	Control	7	99696094	99696988	AML1.Control-6 smooth	1.37018	3.50542	MIR93	407050	ENSG00000207757	99691391	99691470	-1	miRNA	microRNA 93 [Source:HGNC Symbol;Acc:31645]
AML1.Control-6.smooth.chr7.cher30	Control	7	99696094	99696988	AML1.Control-6 smooth	1.37018	3.50542	MIR106B	406900	ENSG00000208036	99691616	99691697	-1	miRNA	microRNA 106b [Source:HGNC Symbol;Acc:31495]
AML1.Control-6.smooth.chr7.cher31	Control	7	99973406	99973918	AML1.Control-6 smooth	1.08178	0.356321	PILRA	29992	ENSG00000085514	99965153	99997719	1	protein_coding	paired immunoglobin-like type 2 receptor alpha [Source:HGNC Symbol;Acc:20396]
AML1.Control-6.smooth.chr7.cher32	Control	7	103061326	103061894	AML1.Control-6 smooth	1.04896	0.432915	SLC26A5	375611	ENSG00000170615	102993177	103086624	-1	protein_coding	solute carrier family 26, member 5 (prestin) [Source:HGNC Symbol;Acc:9359]
AML1.Control-6.smooth.chr7.cher37	Control	7	115879068	115879954	AML1.Control-6 smooth	1.24707	2.20649	AC073130.3	NA	ENSG00000243243	115877983	115967950	-1	antisense
AML1.Control-6.smooth.chr7.cher38	Control	7	116161850	116162568	AML1.Control-6 smooth	1.38686	1.52283	CAV1	857	ENSG00000105974	116164839	116201233	1	protein_coding	caveolin 1, caveolae protein, 22kDa [Source:HGNC Symbol;Acc:1527]
AML1.Control-6.smooth.chr7.cher39	Control	7	116255367	116255854	AML1.Control-6 smooth	1.13175	0.729071	AC006159.3	NA	ENSG00000231210	116211014	116254874	-1	lincRNA
AML1.Control-6.smooth.chr7.cher41	Control	7	116336356	116336944	AML1.Control-6 smooth	1.61925	3.95126	MET	4233	ENSG00000105976	116312248	116438440	1	protein_coding	met proto-oncogene (hepatocyte growth factor receptor) [Source:HGNC Symbol;Acc:7029]
AML1.Control-6.smooth.chr7.cher43	Control	7	116589361	116589856	AML1.Control-6 smooth	1.34905	1.23873	ST7	102466616	ENSG00000004866	116593292	116870157	1	protein_coding	suppression of tumorigenicity 7 [Source:HGNC Symbol;Acc:11351]
AML1.Control-6.smooth.chr7.cher43	Control	7	116589361	116589856	AML1.Control-6 smooth	1.34905	1.23873	ST7-OT4	NA	ENSG00000214188	116593953	116738860	1	protein_coding	ST7 overlapping transcript 4 (non-protein coding) [Source:HGNC Symbol;Acc:18835]
AML1.Control-6.smooth.chr7.cher43	Control	7	116589361	116589856	AML1.Control-6 smooth	1.34905	1.23873	RN5S239	NA	ENSG00000222150	116584340	116584468	-1	rRNA	RNA, 5S ribosomal 239 [Source:HGNC Symbol;Acc:43139]
AML1.Control-6.smooth.chr7.cher45	Control	7	116733152	116734770	AML1.Control-6 smooth	1.33898	3.59259	ST7-AS2	101928159	ENSG00000226367	116712126	116786534	-1	antisense	ST7 antisense RNA 2 (non-protein coding) [Source:HGNC Symbol;Acc:16044]
AML1.Control-6.smooth.chr7.cher45	Control	7	116733152	116734770	AML1.Control-6 smooth	1.33898	3.59259	ST7	102466616	ENSG00000004866	116593292	116870157	1	protein_coding	suppression of tumorigenicity 7 [Source:HGNC Symbol;Acc:11351]
AML1.Control-6.smooth.chr7.cher46	Control	7	117079878	117080464	AML1.Control-6 smooth	1.30683	0.894429	AC003045.1	NA	ENSG00000214684	117080036	117080834	-1	pseudogene
AML1.Control-6.smooth.chr7.cher49	Control	7	120504602	120505094	AML1.Control-6 smooth	1.19655	0.922637	TSPAN12	23554	ENSG00000106025	120427376	120498456	-1	protein_coding	tetraspanin 12 [Source:HGNC Symbol;Acc:21641]
AML1.Control-6.smooth.chr7.cher50	Control	7	122635912	122636402	AML1.Control-6 smooth	1.15518	1.04221	TAS2R16	50833	ENSG00000128519	122634759	122635754	-1	protein_coding	taste receptor, type 2, member 16 [Source:HGNC Symbol;Acc:14921]
AML1.Control-6.smooth.chr7.cher53	Control	7	127875960	127876984	AML1.Control-6 smooth	1.43118	2.91493	LEP	3952	ENSG00000174697	127881337	127897681	1	protein_coding	leptin [Source:HGNC Symbol;Acc:6553]
AML1.Control-6.smooth.chr7.cher54	Control	7	128346246	128346846	AML1.Control-6 smooth	1.1824	0.750472	FAM71F1	84691	ENSG00000135248	128349115	128371677	1	protein_coding	family with sequence similarity 71, member F1 [Source:HGNC Symbol;Acc:30704]
AML1.Control-6.smooth.chr7.cher55	Control	7	128466730	128467220	AML1.Control-6 smooth	1.05145	0.404244	FLNC	2318	ENSG00000128591	128470431	128499328	1	protein_coding	filamin C, gamma [Source:HGNC Symbol;Acc:3756]
AML1.Control-6.smooth.chr7.cher56	Control	7	129841304	129841792	AML1.Control-6 smooth	1.16654	0.957556	C7orf45	136263	ENSG00000165120	129847700	129856683	1	protein_coding	chromosome 7 open reading frame 45 [Source:HGNC Symbol;Acc:29580]
AML1.Control-6.smooth.chr7.cher57	Control	7	130132790	130133396	AML1.Control-6 smooth	1.1966	1.27571	MEST	4232	ENSG00000106484	130126046	130146133	1	protein_coding	mesoderm specific transcript homolog (mouse) [Source:HGNC Symbol;Acc:7028]
AML1.Control-6.smooth.chr7.cher57	Control	7	130132790	130133396	AML1.Control-6 smooth	1.1966	1.27571	MIR335	442904	ENSG00000199043	130135952	130136045	1	miRNA	microRNA 335 [Source:HGNC Symbol;Acc:31773]
AML1.Control-6.smooth.chr7.cher58	Control	7	130421092	130421618	AML1.Control-6 smooth	1.24628	1.23607	KLF14	136259	ENSG00000174595	130417401	130418888	-1	protein_coding	Kruppel-like factor 14 [Source:HGNC Symbol;Acc:23025]
AML1.Control-6.smooth.chr7.cher60	Control	7	141253149	141253645	AML1.Control-6 smooth	1.10682	0.393118	AGK	55750	ENSG00000006530	141250989	141355044	1	protein_coding	acylglycerol kinase [Source:HGNC Symbol;Acc:21869]
AML1.Control-6.smooth.chr7.cher60	Control	7	141253149	141253645	AML1.Control-6 smooth	1.10682	0.393118	RP11-744I24.2	NA	ENSG00000261570	141229003	141251104	-1	antisense
AML1.Control-6.smooth.chr7.cher61	Control	7	141649570	141650314	AML1.Control-6 smooth	1.29859	1.18478	CLEC5A	23601	ENSG00000258227	141627157	141646807	-1	protein_coding	C-type lectin domain family 5, member A [Source:HGNC Symbol;Acc:2054]
AML1.Control-6.smooth.chr7.cher62	Control	7	142514426	142515035	AML1.Control-6 smooth	1.16142	1.04198	TRBV30	NA	ENSG00000237254	142510271	142511084	-1	TR_V_gene	T cell receptor beta variable 30 (gene/pseudogene) [Source:HGNC Symbol;Acc:12214]
AML1.Control-6.smooth.chr7.cher63	Control	7	142765744	142766230	AML1.Control-6 smooth	1.26494	0.847281	OR6W1P	89883	ENSG00000179420	142759427	142760735	-1	pseudogene	olfactory receptor, family 6, subfamily W, member 1 pseudogene [Source:HGNC Symbol;Acc:15091]
AML1.Control-6.smooth.chr7.cher64	Control	7	142980292	142981303	AML1.Control-6 smooth	1.30879	2.64867	TMEM139	135932	ENSG00000178826	142977050	142985141	1	protein_coding	transmembrane protein 139 [Source:HGNC Symbol;Acc:22058]
AML1.Control-6.smooth.chr7.cher64	Control	7	142980292	142981303	AML1.Control-6 smooth	1.30879	2.64867	CASP2	835	ENSG00000106144	142985308	143004789	1	protein_coding	caspase 2, apoptosis-related cysteine peptidase [Source:HGNC Symbol;Acc:1503]
AML1.Control-6.smooth.chr7.cher64	Control	7	142980292	142981303	AML1.Control-6 smooth	1.30879	2.64867	AC073342.1	NA	ENSG00000239419	142987708	142987999	1	scRNA_pseudogene
AML1.Control-6.smooth.chr7.cher64	Control	7	142980292	142981303	AML1.Control-6 smooth	1.30879	2.64867	AC073342.12	NA	ENSG00000231840	142952357	142984473	-1	antisense
AML1.Control-6.smooth.chr7.cher65	Control	7	143072296	143073000	AML1.Control-6 smooth	1.3789	1.03994	ZYX	7791	ENSG00000159840	143078173	143088204	1	protein_coding	zyxin [Source:HGNC Symbol;Acc:13200]
AML1.Control-6.smooth.chr7.cher67	Control	7	143632970	143633580	AML1.Control-6 smooth	1.20941	1.24788	OR2F2	135948	ENSG00000221910	143632259	143633372	1	protein_coding	olfactory receptor, family 2, subfamily F, member 2 [Source:HGNC Symbol;Acc:8247]
AML1.Control-6.smooth.chr7.cher68	Control	7	143650966	143651650	AML1.Control-6 smooth	1.07941	0.56862	OR2F1	26211	ENSG00000213215	143657027	143658108	1	protein_coding	olfactory receptor, family 2, subfamily F, member 1 [Source:HGNC Symbol;Acc:8246]
AML1.Control-6.smooth.chr7.cher68	Control	7	143650966	143651650	AML1.Control-6 smooth	1.07941	0.56862	RP4-669B10.3	NA	ENSG00000243583	143651937	143694405	1	processed_transcript
AML1.Control-6.smooth.chr7.cher69	Control	7	143747138	143747638	AML1.Control-6 smooth	1.18316	0.729542	OR2A5	393046	ENSG00000221836	143747461	143748473	1	protein_coding	olfactory receptor, family 2, subfamily A, member 5 [Source:HGNC Symbol;Acc:8232]
AML1.Control-6.smooth.chr7.cher70	Control	7	148393969	148394584	AML1.Control-6 smooth	1.13672	0.89535	CUL1	8454	ENSG00000055130	148395006	148498201	1	protein_coding	cullin 1 [Source:HGNC Symbol;Acc:2551]
AML1.Control-6.smooth.chr7.cher71	Control	7	149151446	149152156	AML1.Control-6 smooth	1.44285	2.38541	ZNF777	27153	ENSG00000196453	149128454	149158214	-1	protein_coding	zinc finger protein 777 [Source:HGNC Symbol;Acc:22213]
AML1.Control-6.smooth.chr7.cher72	Control	7	150414354	150414830	AML1.Control-6 smooth	1.06237	0.422475	GIMAP5	100527949	ENSG00000196329	150419341	150447121	1	protein_coding	GTPase, IMAP family member 5 [Source:HGNC Symbol;Acc:18005]
AML1.Control-6.smooth.chr7.cher72	Control	7	150414354	150414830	AML1.Control-6 smooth	1.06237	0.422475	GIMAP1	170575	ENSG00000213203	150413645	150421372	1	protein_coding	GTPase, IMAP family member 1 [Source:HGNC Symbol;Acc:23237]
AML1.Control-6.smooth.chr8.cher1	Control	8	6564004	6564508	AML1.Control-6 smooth	1.52826	3.09029	AGPAT5	55326	ENSG00000155189	6565878	6617184	1	protein_coding	1-acylglycerol-3-phosphate O-acyltransferase 5 (lysophosphatidic acid acyltransferase, epsilon) [Source:HGNC Symbol;Acc:20886]
AML1.Control-6.smooth.chr8.cher1	Control	8	6564004	6564508	AML1.Control-6 smooth	1.52826	3.09029	CTD-2541M15.1	NA	ENSG00000249898	6475996	6565730	-1	antisense
AML1.Control-6.smooth.chr8.cher2	Control	8	12603294	12603878	AML1.Control-6 smooth	1.27872	2.06198	LONRF1	91694	ENSG00000154359	12579403	12613582	-1	protein_coding	LON peptidase N-terminal domain and ring finger 1 [Source:HGNC Symbol;Acc:26302]
AML1.Control-6.smooth.chr8.cher3	Control	8	12807296	12808223	AML1.Control-6 smooth	1.6119	2.3715	KIAA1456	101927137	ENSG00000250305	12803151	12889012	1	protein_coding	Putative methyltransferase KIAA1456 [Source:UniProtKB/Swiss-Prot;Acc:Q9P272]
AML1.Control-6.smooth.chr8.cher3	Control	8	12807296	12808223	AML1.Control-6 smooth	1.6119	2.3715	AC135352.1	NA	ENSG00000170941	12808865	12865179	1	protein_coding	Uncharacterized protein KIAA1456 [Source:UniProtKB/Swiss-Prot;Acc:Q8N9K7]
AML1.Control-6.smooth.chr8.cher4	Control	8	16054519	16055006	AML1.Control-6 smooth	1.09752	0.558006	MSR1	4481	ENSG00000038945	15965387	16424999	-1	protein_coding	macrophage scavenger receptor 1 [Source:HGNC Symbol;Acc:7376]
AML1.Control-6.smooth.chr8.cher5	Control	8	18546720	18547616	AML1.Control-6 smooth	1.38873	3.63342	PSD3	23362	ENSG00000156011	18384811	18942240	-1	protein_coding	pleckstrin and Sec7 domain containing 3 [Source:HGNC Symbol;Acc:19093]
AML1.Control-6.smooth.chr8.cher6	Control	8	18870437	18870926	AML1.Control-6 smooth	1.45125	2.56098	PSD3	23362	ENSG00000156011	18384811	18942240	-1	protein_coding	pleckstrin and Sec7 domain containing 3 [Source:HGNC Symbol;Acc:19093]
AML1.Control-6.smooth.chr8.cher8	Control	8	21895740	21896246	AML1.Control-6 smooth	1.213	1.40209	FGF17	8822	ENSG00000158815	21899909	21906320	1	protein_coding	fibroblast growth factor 17 [Source:HGNC Symbol;Acc:3673]
AML1.Control-6.smooth.chr8.cher9	Control	8	22297155	22297652	AML1.Control-6 smooth	1.55468	2.7703	PPP3CC	5533	ENSG00000120910	22298332	22398652	1	protein_coding	protein phosphatase 3, catalytic subunit, gamma isozyme [Source:HGNC Symbol;Acc:9316]
AML1.Control-6.smooth.chr8.cher10	Control	8	22932862	22933498	AML1.Control-6 smooth	1.23501	1.31655	RP11-875O11.3	NA	ENSG00000253616	22928890	22932001	-1	antisense
AML1.Control-6.smooth.chr8.cher10	Control	8	22932862	22933498	AML1.Control-6 smooth	1.23501	1.31655	TNFRSF10B	8795	ENSG00000120889	22877646	22926692	-1	protein_coding	tumor necrosis factor receptor superfamily, member 10b [Source:HGNC Symbol;Acc:11905]
AML1.Control-6.smooth.chr8.cher11	Control	8	30397492	30398006	AML1.Control-6 smooth	1.92978	3.97809	RBPMS	11030	ENSG00000157110	30241944	30429778	1	protein_coding	RNA binding protein with multiple splicing [Source:HGNC Symbol;Acc:19097]
AML1.Control-6.smooth.chr8.cher12	Control	8	30514556	30515060	AML1.Control-6 smooth	1.04132	0.201781	GTF2E2	2961	ENSG00000197265	30435835	30515768	-1	protein_coding	general transcription factor IIE, polypeptide 2, beta 34kDa [Source:HGNC Symbol;Acc:4651]
AML1.Control-6.smooth.chr8.cher13	Control	8	32407410	32408078	AML1.Control-6 smooth	1.6889	3.9196	NRG1	3084	ENSG00000157168	31496902	32622548	1	protein_coding	neuregulin 1 [Source:HGNC Symbol;Acc:7997]
AML1.Control-6.smooth.chr8.cher14	Control	8	40753772	40754457	AML1.Control-6 smooth	1.35928	0.860943	ZMAT4	79698	ENSG00000165061	40388109	40755352	-1	protein_coding	zinc finger, matrin-type 4 [Source:HGNC Symbol;Acc:25844]
AML1.Control-6.smooth.chr8.cher15	Control	8	41519924	41520408	AML1.Control-6 smooth	1.36151	1.55237	ANK1	286	ENSG00000029534	41510739	41754280	-1	protein_coding	ankyrin 1, erythrocytic [Source:HGNC Symbol;Acc:492]
AML1.Control-6.smooth.chr8.cher15	Control	8	41519924	41520408	AML1.Control-6 smooth	1.36151	1.55237	RP11-930P14.1	NA	ENSG00000253389	41518509	41523084	1	protein_coding	Uncharacterized protein [Source:UniProtKB/TrEMBL;Acc:E5RFF1]
AML1.Control-6.smooth.chr8.cher16	Control	8	42549118	42549590	AML1.Control-6 smooth	1.31265	1.36678	CHRNB3	1142	ENSG00000147432	42552519	42592550	1	protein_coding	cholinergic receptor, nicotinic, beta 3 (neuronal) [Source:HGNC Symbol;Acc:1963]
AML1.Control-6.smooth.chr8.cher17	Control	8	67699764	67700354	AML1.Control-6 smooth	1.26309	1.35128	SGK3	100533105	ENSG00000104205	67579831	67774257	1	protein_coding	serum/glucocorticoid regulated kinase family, member 3 [Source:HGNC Symbol;Acc:10812]
AML1.Control-6.smooth.chr8.cher19	Control	8	72754748	72755248	AML1.Control-6 smooth	1.31504	1.76178	RP11-383H13.1	100132891	ENSG00000235531	72740402	73030628	1	protein_coding	Uncharacterized protein; cDNA FLJ53548 [Source:UniProtKB/TrEMBL;Acc:B7Z945]
AML1.Control-6.smooth.chr8.cher19	Control	8	72754748	72755248	AML1.Control-6 smooth	1.31504	1.76178	MSC	9242	ENSG00000178860	72753784	72756703	-1	protein_coding	musculin [Source:HGNC Symbol;Acc:7321]
AML1.Control-6.smooth.chr8.cher21	Control	8	81788655	81789362	AML1.Control-6 smooth	1.46155	3.59852	ZNF704	619279	ENSG00000164684	81540686	81787016	-1	protein_coding	zinc finger protein 704 [Source:HGNC Symbol;Acc:32291]
AML1.Control-6.smooth.chr8.cher22	Control	8	89343418	89343998	AML1.Control-6 smooth	1.36236	2.42209	MMP16	4325	ENSG00000156103	89044237	89340254	-1	protein_coding	matrix metallopeptidase 16 (membrane-inserted) [Source:HGNC Symbol;Acc:7162]
AML1.Control-6.smooth.chr8.cher23	Control	8	93033437	93034136	AML1.Control-6 smooth	1.49585	3.58242	RUNX1T1	862	ENSG00000079102	92967203	93115514	-1	protein_coding	runt-related transcription factor 1; translocated to, 1 (cyclin D-related) [Source:HGNC Symbol;Acc:1535]
AML1.Control-6.smooth.chr8.cher25	Control	8	97250826	97251462	AML1.Control-6 smooth	1.24261	1.77427	UQCRB	7381	ENSG00000156467	97238148	97247862	-1	protein_coding	ubiquinol-cytochrome c reductase binding protein [Source:HGNC Symbol;Acc:12582]
AML1.Control-6.smooth.chr8.cher26	Control	8	97507936	97508436	AML1.Control-6 smooth	1.2705	1.50903	SDC2	6383	ENSG00000169439	97505579	97624000	1	protein_coding	syndecan 2 [Source:HGNC Symbol;Acc:10659]
AML1.Control-6.smooth.chr8.cher27	Control	8	98287510	98288104	AML1.Control-6 smooth	1.5501	2.95971	TSPYL5	85453	ENSG00000180543	98285717	98290176	-1	protein_coding	TSPY-like 5 [Source:HGNC Symbol;Acc:29367]
AML1.Control-6.smooth.chr8.cher28	Control	8	99479535	99480138	AML1.Control-6 smooth	1.03225	0.296449	U6	NA	ENSG00000207378	99475172	99475278	-1	snRNA	U6 spliceosomal RNA [Source:RFAM;Acc:RF00026]
AML1.Control-6.smooth.chr8.cher29	Control	8	101326532	101327005	AML1.Control-6 smooth	1.19288	0.740336	RNF19A	25897	ENSG00000034677	101269288	101348446	-1	protein_coding	ring finger protein 19A, E3 ubiquitin protein ligase [Source:HGNC Symbol;Acc:13432]
AML1.Control-6.smooth.chr8.cher30	Control	8	103562386	103563116	AML1.Control-6 smooth	1.51885	2.95957	ODF1	4956	ENSG00000155087	103563800	103573245	1	protein_coding	outer dense fiber of sperm tails 1 [Source:HGNC Symbol;Acc:8113]
AML1.Control-6.smooth.chr8.cher31	Control	8	104506603	104507906	AML1.Control-6 smooth	1.73527	4.66066	RIMS2	9699	ENSG00000176406	104512976	105268322	1	protein_coding	regulating synaptic membrane exocytosis 2 [Source:HGNC Symbol;Acc:17283]
AML1.Control-6.smooth.chr8.cher32	Control	8	105481866	105482317	AML1.Control-6 smooth	1.1775	1.18399	DPYS	1807	ENSG00000147647	105391652	105479281	-1	protein_coding	dihydropyrimidinase [Source:HGNC Symbol;Acc:3013]
AML1.Control-6.smooth.chr8.cher33	Control	8	109261480	109262082	AML1.Control-6 smooth	1.56154	3.36272	EIF3E	3646	ENSG00000104408	109213445	109447562	-1	protein_coding	eukaryotic translation initiation factor 3, subunit E [Source:HGNC Symbol;Acc:3277]
AML1.Control-6.smooth.chr8.cher34	Control	8	110984485	110984978	AML1.Control-6 smooth	1.13274	0.597479	RP11-696P8.2	NA	ENSG00000255402	110986172	110987010	1	antisense
AML1.Control-6.smooth.chr8.cher34	Control	8	110984485	110984978	AML1.Control-6 smooth	1.13274	0.597479	KCNV1	27012	ENSG00000164794	110975874	110988076	-1	protein_coding	potassium channel, subfamily V, member 1 [Source:HGNC Symbol;Acc:18861]
AML1.Control-6.smooth.chr8.cher35	Control	8	117777274	117777772	AML1.Control-6 smooth	1.12097	0.566013	UTP23	84294	ENSG00000147679	117778742	117861702	1	protein_coding	UTP23, small subunit (SSU) processome component, homolog (yeast) [Source:HGNC Symbol;Acc:28224]
AML1.Control-6.smooth.chr8.cher35	Control	8	117777274	117777772	AML1.Control-6 smooth	1.12097	0.566013	EIF3H	8667	ENSG00000147677	117654369	117779164	-1	protein_coding	eukaryotic translation initiation factor 3, subunit H [Source:HGNC Symbol;Acc:3273]
AML1.Control-6.smooth.chr8.cher41	Control	8	120655882	120656664	AML1.Control-6 smooth	1.59246	3.19556	ENPP2	5168	ENSG00000136960	120569326	120685693	-1	protein_coding	ectonucleotide pyrophosphatase/phosphodiesterase 2 [Source:HGNC Symbol;Acc:3357]
AML1.Control-6.smooth.chr8.cher43	Control	8	124252368	124252864	AML1.Control-6 smooth	1.21497	0.530269	C8orf76	84933	ENSG00000189376	124232196	124253638	-1	protein_coding	chromosome 8 open reading frame 76 [Source:HGNC Symbol;Acc:25924]
AML1.Control-6.smooth.chr8.cher44	Control	8	124753288	124753792	AML1.Control-6 smooth	1.11945	0.450327	ANXA13	312	ENSG00000104537	124693034	124749647	-1	protein_coding	annexin A13 [Source:HGNC Symbol;Acc:536]
AML1.Control-6.smooth.chr8.cher45	Control	8	125057798	125058275	AML1.Control-6 smooth	1.14656	0.956727	FER1L6-AS1	439941	ENSG00000181171	124996378	125053023	-1	antisense	FER1L6 antisense RNA 1 (non-protein coding) [Source:HGNC Symbol;Acc:26652]
AML1.Control-6.smooth.chr8.cher45	Control	8	125057798	125058275	AML1.Control-6 smooth	1.14656	0.956727	RP11-959I15.4	NA	ENSG00000254249	125048251	125052709	-1	antisense
AML1.Control-6.smooth.chr8.cher46	Control	8	126109354	126110164	AML1.Control-6 smooth	1.35737	2.2825	KIAA0196	9897	ENSG00000164961	126036502	126104082	-1	protein_coding	KIAA0196 [Source:HGNC Symbol;Acc:28984]
AML1.Control-6.smooth.chr8.cher46	Control	8	126109354	126110164	AML1.Control-6 smooth	1.35737	2.2825	NSMCE2	286053	ENSG00000156831	126103921	126379362	1	protein_coding	non-SMC element 2, MMS21 homolog (S. cerevisiae) [Source:HGNC Symbol;Acc:26513]
AML1.Control-6.smooth.chr8.cher47	Control	8	134198869	134199566	AML1.Control-6 smooth	1.41839	2.59373	WISP1	8840	ENSG00000104415	134203282	134240603	1	protein_coding	WNT1 inducible signaling pathway protein 1 [Source:HGNC Symbol;Acc:12769]
AML1.Control-6.smooth.chr8.cher48	Control	8	134201567	134202366	AML1.Control-6 smooth	1.80314	5.32985	WISP1	8840	ENSG00000104415	134203282	134240603	1	protein_coding	WNT1 inducible signaling pathway protein 1 [Source:HGNC Symbol;Acc:12769]
AML1.Control-6.smooth.chr8.cher49	Control	8	144244435	144245122	AML1.Control-6 smooth	1.07105	0.553617	LY6H	4062	ENSG00000176956	144239331	144242128	-1	protein_coding	lymphocyte antigen 6 complex, locus H [Source:HGNC Symbol;Acc:6728]
AML1.Control-6.smooth.chr8.cher50	Control	8	144725278	144726168	AML1.Control-6 smooth	1.24719	0.707333	ZNF623	9831	ENSG00000183309	144718183	144738588	1	protein_coding	zinc finger protein 623 [Source:HGNC Symbol;Acc:29084]
AML1.Control-6.smooth.chr9.cher2	Control	9	15416620	15417242	AML1.Control-6 smooth	1.49202	2.03957	SNAPC3	6619	ENSG00000164975	15422702	15465951	1	protein_coding	small nuclear RNA activating complex, polypeptide 3, 50kDa [Source:HGNC Symbol;Acc:11136]
AML1.Control-6.smooth.chr9.cher3	Control	9	18825188	18825684	AML1.Control-6 smooth	1.00804	0.121686	ADAMTSL1	92949	ENSG00000178031	18473892	18910948	1	protein_coding	ADAMTS-like 1 [Source:HGNC Symbol;Acc:14632]
AML1.Control-6.smooth.chr9.cher4	Control	9	21032454	21032961	AML1.Control-6 smooth	1.12082	0.341594	PTPLAD2	401494	ENSG00000188921	20995306	21031635	-1	protein_coding	protein tyrosine phosphatase-like A domain containing 2 [Source:HGNC Symbol;Acc:20920]
AML1.Control-6.smooth.chr9.cher5	Control	9	21485134	21485650	AML1.Control-6 smooth	1.07922	0.47816	IFNE	338376	ENSG00000184995	21480841	21482312	-1	protein_coding	interferon, epsilon [Source:HGNC Symbol;Acc:18163]
AML1.Control-6.smooth.chr9.cher6	Control	9	27104166	27104696	AML1.Control-6 smooth	1.04183	0.325595	TEK	7010	ENSG00000120156	27109139	27230173	1	protein_coding	TEK tyrosine kinase, endothelial [Source:HGNC Symbol;Acc:11724]
AML1.Control-6.smooth.chr9.cher6	Control	9	27104166	27104696	AML1.Control-6 smooth	1.04183	0.325595	RP11-56F10.3	NA	ENSG00000254396	27102628	27104726	1	lincRNA
AML1.Control-6.smooth.chr9.cher7	Control	9	27530038	27530674	AML1.Control-6 smooth	1.14777	0.477198	MOB3B	79817	ENSG00000120162	27325207	27529779	-1	protein_coding	MOB kinase activator 3B [Source:HGNC Symbol;Acc:23825]
AML1.Control-6.smooth.chr9.cher8	Control	9	32988742	32989554	AML1.Control-6 smooth	1.37275	2.08771	APTX	54840	ENSG00000137074	32972604	33025166	-1	protein_coding	aprataxin [Source:HGNC Symbol;Acc:15984]
AML1.Control-6.smooth.chr9.cher9	Control	9	32992568	32993564	AML1.Control-6 smooth	1.81118	5.82894	APTX	54840	ENSG00000137074	32972604	33025166	-1	protein_coding	aprataxin [Source:HGNC Symbol;Acc:15984]
AML1.Control-6.smooth.chr9.cher10	Control	9	33081035	33081639	AML1.Control-6 smooth	1.18903	0.965623	SMU1	55234	ENSG00000122692	33041762	33076665	-1	protein_coding	smu-1 suppressor of mec-8 and unc-52 homolog (C. elegans) [Source:HGNC Symbol;Acc:18247]
AML1.Control-6.smooth.chr9.cher11	Control	9	33235934	33236428	AML1.Control-6 smooth	1.19164	0.897524	SPINK4	27290	ENSG00000122711	33218363	33248565	1	protein_coding	serine peptidase inhibitor, Kazal type 4 [Source:HGNC Symbol;Acc:16646]
AML1.Control-6.smooth.chr9.cher12	Control	9	33240538	33241048	AML1.Control-6 smooth	1.32006	1.75188	SPINK4	27290	ENSG00000122711	33218363	33248565	1	protein_coding	serine peptidase inhibitor, Kazal type 4 [Source:HGNC Symbol;Acc:16646]
AML1.Control-6.smooth.chr9.cher13	Control	9	33292060	33292744	AML1.Control-6 smooth	1.81782	4.81963	NFX1	4799	ENSG00000086102	33290509	33371155	1	protein_coding	nuclear transcription factor, X-box binding 1 [Source:HGNC Symbol;Acc:7803]
AML1.Control-6.smooth.chr9.cher14	Control	9	34131485	34131978	AML1.Control-6 smooth	1.10807	0.756543	DCAF12	25853	ENSG00000198876	34086522	34127397	-1	protein_coding	DDB1 and CUL4 associated factor 12 [Source:HGNC Symbol;Acc:19911]
AML1.Control-6.smooth.chr9.cher15	Control	9	34382618	34383213	AML1.Control-6 smooth	1.4017	2.61136	KIAA1161	57462	ENSG00000164976	34366668	34376851	-1	protein_coding	KIAA1161 [Source:HGNC Symbol;Acc:19918]
AML1.Control-6.smooth.chr9.cher15	Control	9	34382618	34383213	AML1.Control-6 smooth	1.4017	2.61136	C9orf24	84688	ENSG00000164972	34379017	34397830	-1	protein_coding	chromosome 9 open reading frame 24 [Source:HGNC Symbol;Acc:19919]
AML1.Control-6.smooth.chr9.cher16	Control	9	34384418	34385226	AML1.Control-6 smooth	1.31267	2.73471	C9orf24	84688	ENSG00000164972	34379017	34397830	-1	protein_coding	chromosome 9 open reading frame 24 [Source:HGNC Symbol;Acc:19919]
AML1.Control-6.smooth.chr9.cher18	Control	9	35401222	35401788	AML1.Control-6 smooth	1.07384	0.513579	ATP8B5P	158381	ENSG00000179766	35406752	35483026	1	pseudogene	ATPase, class I, type 8B, member 5, pseudogene [Source:HGNC Symbol;Acc:27245]
AML1.Control-6.smooth.chr9.cher19	Control	9	35727530	35728025	AML1.Control-6 smooth	1.00534	0.154175	CREB3	10488	ENSG00000107175	35732332	35737001	1	protein_coding	cAMP responsive element binding protein 3 [Source:HGNC Symbol;Acc:2347]
AML1.Control-6.smooth.chr9.cher20	Control	9	35831498	35832398	AML1.Control-6 smooth	1.39457	2.25217	C9orf128	392307	ENSG00000204930	35816388	35828744	-1	protein_coding	chromosome 9 open reading frame 128 [Source:HGNC Symbol;Acc:30762]
AML1.Control-6.smooth.chr9.cher20	Control	9	35831498	35832398	AML1.Control-6 smooth	1.39457	2.25217	TMEM8B	51754	ENSG00000137103	35814448	35854844	1	protein_coding	transmembrane protein 8B [Source:HGNC Symbol;Acc:21427]
AML1.Control-6.smooth.chr9.cher21	Control	9	37749862	37750458	AML1.Control-6 smooth	1.86617	5.47241	RG9MTD3	158234	ENSG00000165275	37753804	37778969	1	protein_coding	RNA (guanine-9-) methyltransferase domain containing 3 [Source:HGNC Symbol;Acc:26454]
AML1.Control-6.smooth.chr9.cher22	Control	9	85944404	85944902	AML1.Control-6 smooth	1.36517	1.65524	FRMD3	257019	ENSG00000172159	85857905	86153461	-1	protein_coding	FERM domain containing 3 [Source:HGNC Symbol;Acc:24125]
AML1.Control-6.smooth.chr9.cher24	Control	9	90496110	90496600	AML1.Control-6 smooth	1.46492	2.03801	FAM75E1	286234	ENSG00000177992	90497741	90503814	1	protein_coding	family with sequence similarity 75, member E1 [Source:HGNC Symbol;Acc:26672]
AML1.Control-6.smooth.chr9.cher26	Control	9	99066634	99067113	AML1.Control-6 smooth	1.31021	1.8847	HSD17B3	3293	ENSG00000130948	98997588	99064434	-1	protein_coding	hydroxysteroid (17-beta) dehydrogenase 3 [Source:HGNC Symbol;Acc:5212]
AML1.Control-6.smooth.chr9.cher27	Control	9	100055238	100055696	AML1.Control-6 smooth	1.16587	0.678825	RP11-23J9.4	57653	ENSG00000255036	100000779	100139569	1	processed_transcript
AML1.Control-6.smooth.chr9.cher28	Control	9	103231956	103232658	AML1.Control-6 smooth	1.29127	1.94243	TMEFF1	8577	ENSG00000241697	103204560	103339918	1	protein_coding	transmembrane protein with EGF-like and two follistatin-like domains 1 [Source:HGNC Symbol;Acc:11866]
AML1.Control-6.smooth.chr9.cher29	Control	9	104167126	104167620	AML1.Control-6 smooth	1.15426	0.830841	MRPL50	54534	ENSG00000136897	104149915	104160896	-1	protein_coding	mitochondrial ribosomal protein L50 [Source:HGNC Symbol;Acc:16654]
AML1.Control-6.smooth.chr9.cher30	Control	9	104356428	104356928	AML1.Control-6 smooth	1.08298	0.562632	PPP3R2	5535	ENSG00000188386	104353897	104357283	-1	protein_coding	protein phosphatase 3, regulatory subunit B, beta [Source:HGNC Symbol;Acc:9318]
AML1.Control-6.smooth.chr9.cher31	Control	9	107382412	107383246	AML1.Control-6 smooth	1.22972	1.84424	OR13C9	286362	ENSG00000136839	107379529	107380485	-1	protein_coding	olfactory receptor, family 13, subfamily C, member 9 [Source:HGNC Symbol;Acc:15104]
AML1.Control-6.smooth.chr9.cher32	Control	9	115817855	115818655	AML1.Control-6 smooth	1.56056	4.28221	ZFP37	7539	ENSG00000136866	115800660	115819039	-1	protein_coding	zinc finger protein 37 homolog (mouse) [Source:HGNC Symbol;Acc:12863]
AML1.Control-6.smooth.chr9.cher34	Control	9	116964652	116965172	AML1.Control-6 smooth	1.07906	0.261114	MIR455	619556	ENSG00000207726	116971714	116971809	1	miRNA	microRNA 455 [Source:HGNC Symbol;Acc:32344]
AML1.Control-6.smooth.chr9.cher35	Control	9	117137062	117138246	AML1.Control-6 smooth	1.45183	3.24643	AKNA	80709	ENSG00000106948	117096436	117156685	-1	protein_coding	AT-hook transcription factor [Source:HGNC Symbol;Acc:24108]
AML1.Control-6.smooth.chr9.cher36	Control	9	117193538	117194114	AML1.Control-6 smooth	1.20253	1.21998	DFNB31	25861	ENSG00000095397	117164360	117267730	-1	protein_coding	deafness, autosomal recessive 31 [Source:HGNC Symbol;Acc:16361]
AML1.Control-6.smooth.chr9.cher37	Control	9	117903838	117904446	AML1.Control-6 smooth	1.46849	2.56319	RP11-523L1.2	101928748	ENSG00000236461	117881818	117900688	-1	lincRNA
AML1.Control-6.smooth.chr9.cher37	Control	9	117903838	117904446	AML1.Control-6 smooth	1.46849	2.56319	DEC1	50514	ENSG00000173077	117904097	118164923	1	protein_coding	deleted in esophageal cancer 1 [Source:HGNC Symbol;Acc:23658]
AML1.Control-6.smooth.chr9.cher38	Control	9	117905322	117905920	AML1.Control-6 smooth	1.06907	0.569354	RP11-523L1.2	101928748	ENSG00000236461	117881818	117900688	-1	lincRNA
AML1.Control-6.smooth.chr9.cher38	Control	9	117905322	117905920	AML1.Control-6 smooth	1.06907	0.569354	DEC1	50514	ENSG00000173077	117904097	118164923	1	protein_coding	deleted in esophageal cancer 1 [Source:HGNC Symbol;Acc:23658]
AML1.Control-6.smooth.chr9.cher40	Control	9	125875642	125876136	AML1.Control-6 smooth	1.09019	0.489362	MIR600HG	693185	ENSG00000236901	125871773	125877756	-1	ncrna_host	MIR600 host gene (non-protein coding) [Source:HGNC Symbol;Acc:23642]
AML1.Control-6.smooth.chr9.cher40	Control	9	125875642	125876136	AML1.Control-6 smooth	1.09019	0.489362	MIR600	NA	ENSG00000207740	125873825	125873922	-1	miRNA	microRNA 600 [Source:HGNC Symbol;Acc:32856]
AML1.Control-6.smooth.chr9.cher41	Control	9	126032090	126032876	AML1.Control-6 smooth	1.53001	3.99508	STRBP	55342	ENSG00000165209	125871779	126030855	-1	protein_coding	spermatid perinuclear RNA binding protein [Source:HGNC Symbol;Acc:16462]
AML1.Control-6.smooth.chr9.cher42	Control	9	131134388	131135058	AML1.Control-6 smooth	1.50743	2.03712	URM1	81605	ENSG00000167118	131133598	131153015	1	protein_coding	ubiquitin related modifier 1 [Source:HGNC Symbol;Acc:28378]
AML1.Control-6.smooth.chr9.cher43	Control	9	131257964	131258658	AML1.Control-6 smooth	1.15102	0.915532	ODF2	4957	ENSG00000136811	131217466	131263239	1	protein_coding	outer dense fiber of sperm tails 2 [Source:HGNC Symbol;Acc:8114]
AML1.Control-6.smooth.chr9.cher44	Control	9	131315808	131316798	AML1.Control-6 smooth	1.17423	1.12438	RP11-216B9.6	NA	ENSG00000228395	131291180	131314689	-1	antisense
AML1.Control-6.smooth.chr9.cher44	Control	9	131315808	131316798	AML1.Control-6 smooth	1.17423	1.12438	SPTAN1	6709	ENSG00000197694	131314866	131395941	1	protein_coding	spectrin, alpha, non-erythrocytic 1 (alpha-fodrin) [Source:HGNC Symbol;Acc:11273]
AML1.Control-6.smooth.chr9.cher45	Control	9	131647158	131647620	AML1.Control-6 smooth	1.33121	1.56676	CCBL1	883	ENSG00000171097	131595221	131644773	-1	protein_coding	cysteine conjugate-beta lyase, cytoplasmic [Source:HGNC Symbol;Acc:1564]
AML1.Control-6.smooth.chr9.cher45	Control	9	131647158	131647620	AML1.Control-6 smooth	1.33121	1.56676	LRRC8A	56262	ENSG00000136802	131644391	131680318	1	protein_coding	leucine rich repeat containing 8 family, member A [Source:HGNC Symbol;Acc:19027]
AML1.Control-6.smooth.chr9.cher47	Control	9	135815442	135815933	AML1.Control-6 smooth	1.14399	0.915504	GFI1B	8328	ENSG00000165702	135820932	135867083	1	protein_coding	growth factor independent 1B transcription repressor [Source:HGNC Symbol;Acc:4238]
AML1.Control-6.smooth.chr9.cher47	Control	9	135815442	135815933	AML1.Control-6 smooth	1.14399	0.915504	RP11-295G24.4	NA	ENSG00000233800	135822456	135826943	1	sense_intronic
AML1.Control-6.smooth.chr9.cher48	Control	9	136218598	136219090	AML1.Control-6 smooth	1.19597	0.849323	SURF2	6835	ENSG00000148291	136223428	136228045	1	protein_coding	surfeit 2 [Source:HGNC Symbol;Acc:11475]
AML1.Control-6.smooth.chr9.cher48	Control	9	136218598	136219090	AML1.Control-6 smooth	1.19597	0.849323	MED22	6837	ENSG00000148297	136205160	136214986	-1	protein_coding	mediator complex subunit 22 [Source:HGNC Symbol;Acc:11477]
AML1.Control-6.smooth.chr9.cher48	Control	9	136218598	136219090	AML1.Control-6 smooth	1.19597	0.849323	SURF1	6834	ENSG00000148290	136218610	136223552	-1	protein_coding	surfeit 1 [Source:HGNC Symbol;Acc:11474]
AML1.Control-6.smooth.chr9.cher49	Control	9	136279012	136280128	AML1.Control-6 smooth	1.40375	2.5817	REXO4	57109	ENSG00000148300	136271186	136283164	-1	protein_coding	REX4, RNA exonuclease 4 homolog (S. cerevisiae) [Source:HGNC Symbol;Acc:12820]
AML1.Control-6.smooth.chr9.cher49	Control	9	136279012	136280128	AML1.Control-6 smooth	1.40375	2.5817	ADAMTS13	11093	ENSG00000160323	136279478	136324508	1	protein_coding	ADAM metallopeptidase with thrombospondin type 1 motif, 13 [Source:HGNC Symbol;Acc:1366]
AML1.Control-6.smooth.chr9.cher50	Control	9	138720364	138720856	AML1.Control-6 smooth	1.0735	0.412237	CAMSAP1	157922	ENSG00000130559	138700333	138799074	-1	protein_coding	calmodulin regulated spectrin-associated protein 1 [Source:HGNC Symbol;Acc:19946]
AML1.Control-6.smooth.chrX.cher1	Control	X	228698	229138	AML1.Control-6 smooth	1.08197	0.455562	GTPBP6	8225	ENSG00000178605	220013	230886	-1	protein_coding	GTP binding protein 6 (putative) [Source:HGNC Symbol;Acc:30189]
AML1.Control-6.smooth.chrX.cher2	Control	X	2670378	2671489	AML1.Control-6 smooth	1.4624	2.98585	XG	100132596	ENSG00000124343	2670091	2734539	1	protein_coding	Xg blood group [Source:HGNC Symbol;Acc:12806]
AML1.Control-6.smooth.chrX.cher4	Control	X	7804452	7804962	AML1.Control-6 smooth	1.11324	0.662118	VCX	26609	ENSG00000182583	7810303	7812184	1	protein_coding	variable charge, X-linked [Source:HGNC Symbol;Acc:12667]
AML1.Control-6.smooth.chrX.cher5	Control	X	12150144	12150647	AML1.Control-6 smooth	1.69383	3.85663	FRMPD4	9758	ENSG00000169933	12156585	12742642	1	protein_coding	FERM and PDZ domain containing 4 [Source:HGNC Symbol;Acc:29007]
AML1.Control-6.smooth.chrX.cher6	Control	X	13068425	13068904	AML1.Control-6 smooth	1.32797	1.90515	FAM9C	171484	ENSG00000187268	13053737	13062801	-1	protein_coding	family with sequence similarity 9, member C [Source:HGNC Symbol;Acc:18405]
AML1.Control-6.smooth.chrX.cher7	Control	X	15405124	15405902	AML1.Control-6 smooth	1.50315	1.79355	FIGF	2277	ENSG00000165197	15363713	15402498	-1	protein_coding	c-fos induced growth factor (vascular endothelial growth factor D) [Source:HGNC Symbol;Acc:3708]
AML1.Control-6.smooth.chrX.cher8	Control	X	19820800	19821642	AML1.Control-6 smooth	1.19781	0.936869	SH3KBP1	30011	ENSG00000147010	19552083	19905719	-1	protein_coding	SH3-domain kinase binding protein 1 [Source:HGNC Symbol;Acc:13867]
AML1.Control-6.smooth.chrX.cher9	Control	X	24692018	24692538	AML1.Control-6 smooth	1.25152	1.17436	PCYT1B	9468	ENSG00000102230	24576204	24690794	-1	protein_coding	phosphate cytidylyltransferase 1, choline, beta [Source:HGNC Symbol;Acc:8755]
AML1.Control-6.smooth.chrX.cher10	Control	X	30669536	30670216	AML1.Control-6 smooth	1.33311	2.10878	GK	2710	ENSG00000198814	30671476	30748725	1	protein_coding	glycerol kinase [Source:HGNC Symbol;Acc:4289]
AML1.Control-6.smooth.chrX.cher11	Control	X	32435796	32436327	AML1.Control-6 smooth	1.19888	1.16539	DMD	1756	ENSG00000198947	31132808	33357558	-1	protein_coding	dystrophin [Source:HGNC Symbol;Acc:2928]
AML1.Control-6.smooth.chrX.cher12	Control	X	37545748	37546233	AML1.Control-6 smooth	1.16874	0.626593	XK	7504	ENSG00000047597	37545012	37591383	1	protein_coding	X-linked Kx blood group (McLeod syndrome) [Source:HGNC Symbol;Acc:12811]
AML1.Control-6.smooth.chrX.cher14	Control	X	46760698	46761200	AML1.Control-6 smooth	1.11497	0.513156	CXorf31	NA	ENSG00000204904	46746852	46759138	-1	protein_coding	chromosome X open reading frame 31 [Source:HGNC Symbol;Acc:17986]
AML1.Control-6.smooth.chrX.cher15	Control	X	46773696	46774522	AML1.Control-6 smooth	1.6977	3.89922	PHF16	9767	ENSG00000102221	46771711	46920641	1	protein_coding	PHD finger protein 16 [Source:HGNC Symbol;Acc:22982]
AML1.Control-6.smooth.chrX.cher16	Control	X	47001438	47002624	AML1.Control-6 smooth	1.99948	7.96013	RBM10	8241	ENSG00000182872	47004268	47046212	1	protein_coding	RNA binding motif protein 10 [Source:HGNC Symbol;Acc:9896]
AML1.Control-6.smooth.chrX.cher16	Control	X	47001438	47002624	AML1.Control-6 smooth	1.99948	7.96013	NDUFB11	54539	ENSG00000147123	47001615	47004903	-1	protein_coding	NADH dehydrogenase (ubiquinone) 1 beta subcomplex, 11, 17.3kDa [Source:HGNC Symbol;Acc:20372]
AML1.Control-6.smooth.chrX.cher17	Control	X	48911762	48912446	AML1.Control-6 smooth	2.12012	7.65241	CCDC120	90060	ENSG00000147144	48916514	48927509	1	protein_coding	coiled-coil domain containing 120 [Source:HGNC Symbol;Acc:28910]
AML1.Control-6.smooth.chrX.cher18	Control	X	53027986	53028486	AML1.Control-6 smooth	1.28397	1.24559	FAM156A	727866	ENSG00000182646	52976462	53024651	-1	protein_coding	family with sequence similarity 156, member A [Source:HGNC Symbol;Acc:30114]
AML1.Control-6.smooth.chrX.cher20	Control	X	54519470	54520058	AML1.Control-6 smooth	1.30693	2.09623	FGD1	2245	ENSG00000102302	54471887	54522599	-1	protein_coding	FYVE, RhoGEF and PH domain containing 1 [Source:HGNC Symbol;Acc:3663]
AML1.Control-6.smooth.chrX.cher21	Control	X	55018268	55018758	AML1.Control-6 smooth	1.145	0.475514	PFKFB1	5207	ENSG00000158571	54959394	55024967	-1	protein_coding	6-phosphofructo-2-kinase/fructose-2,6-biphosphatase 1 [Source:HGNC Symbol;Acc:8872]
AML1.Control-6.smooth.chrX.cher22	Control	X	66789316	66790036	AML1.Control-6 smooth	1.82816	5.97799	AR	367	ENSG00000169083	66763874	66950461	1	protein_coding	androgen receptor [Source:HGNC Symbol;Acc:644]
AML1.Control-6.smooth.chrX.cher23	Control	X	68398858	68399358	AML1.Control-6 smooth	1.09098	0.349627	LINC00269	100996279	ENSG00000215162	68399400	68429767	1	lincRNA	long intergenic non-protein coding RNA 269 [Source:HGNC Symbol;Acc:26586]
AML1.Control-6.smooth.chrX.cher24	Control	X	69503028	69503806	AML1.Control-6 smooth	1.43396	2.4022	KIF4A	24137	ENSG00000090889	69509879	69640682	1	protein_coding	kinesin family member 4A [Source:HGNC Symbol;Acc:13339]
AML1.Control-6.smooth.chrX.cher24	Control	X	69503028	69503806	AML1.Control-6 smooth	1.43396	2.4022	RAB41	347517	ENSG00000147127	69501943	69504852	1	protein_coding	RAB41, member RAS oncogene family [Source:HGNC Symbol;Acc:18293]
AML1.Control-6.smooth.chrX.cher25	Control	X	69663752	69664242	AML1.Control-6 smooth	1.26517	0.97968	DLG3	1741	ENSG00000082458	69664711	69725337	1	protein_coding	discs, large homolog 3 (Drosophila) [Source:HGNC Symbol;Acc:2902]
AML1.Control-6.smooth.chrX.cher25	Control	X	69663752	69664242	AML1.Control-6 smooth	1.26517	0.97968	U4	NA	ENSG00000200431	69670729	69670872	1	snRNA	U4 spliceosomal RNA [Source:RFAM;Acc:RF00015]
AML1.Control-6.smooth.chrX.cher26	Control	X	70311172	70311843	AML1.Control-6 smooth	1.80958	5.92467	FOXO4	4303	ENSG00000184481	70316047	70323385	1	protein_coding	forkhead box O4 [Source:HGNC Symbol;Acc:7139]
AML1.Control-6.smooth.chrX.cher27	Control	X	70432346	70432846	AML1.Control-6 smooth	1.41324	1.5776	GJB1	2705	ENSG00000169562	70435044	70445366	1	protein_coding	gap junction protein, beta 1, 32kDa [Source:HGNC Symbol;Acc:4283]
AML1.Control-6.smooth.chrX.cher28	Control	X	75641274	75641778	AML1.Control-6 smooth	1.28248	0.879841	MAGEE1	57692	ENSG00000198934	75648046	75651744	1	protein_coding	melanoma antigen family E, 1 [Source:HGNC Symbol;Acc:24934]
AML1.Control-6.smooth.chrX.cher29	Control	X	86962264	86962746	AML1.Control-6 smooth	1.41063	2.48311	RPSAP9	653162	ENSG00000237506	86958277	86959307	-1	pseudogene	ribosomal protein SA pseudogene 9 [Source:HGNC Symbol;Acc:31463]
AML1.Control-6.smooth.chrX.cher30	Control	X	100186748	100187428	AML1.Control-6 smooth	1.75804	3.86911	XKRX	402415	ENSG00000182489	100168431	100184422	-1	protein_coding	XK, Kell blood group complex subunit-related, X-linked [Source:HGNC Symbol;Acc:29845]
AML1.Control-6.smooth.chrX.cher31	Control	X	101972684	101973166	AML1.Control-6 smooth	1.38061	2.32691	BHLHB9	80823	ENSG00000198908	101975616	102008468	1	protein_coding	basic helix-loop-helix domain containing, class B, 9 [Source:HGNC Symbol;Acc:29353]
AML1.Control-6.smooth.chrX.cher32	Control	X	101975662	101976272	AML1.Control-6 smooth	1.75421	3.71557	BHLHB9	80823	ENSG00000198908	101975616	102008468	1	protein_coding	basic helix-loop-helix domain containing, class B, 9 [Source:HGNC Symbol;Acc:29353]
AML1.Control-6.smooth.chrX.cher33	Control	X	102857493	102858084	AML1.Control-6 smooth	1.20024	0.95846	TCEAL3	85012	ENSG00000196507	102862379	102884618	1	protein_coding	transcription elongation factor A (SII)-like 3 [Source:HGNC Symbol;Acc:28247]
AML1.Control-6.smooth.chrX.cher34	Control	X	102964596	102965260	AML1.Control-6 smooth	1.09139	0.896504	TMEM31	203562	ENSG00000179363	102965837	102968956	1	protein_coding	transmembrane protein 31 [Source:HGNC Symbol;Acc:28601]
AML1.Control-6.smooth.chrX.cher35	Control	X	110041754	110042236	AML1.Control-6 smooth	1.21031	0.886878	CHRDL1	91851	ENSG00000101938	109917084	110039286	-1	protein_coding	chordin-like 1 [Source:HGNC Symbol;Acc:29861]
AML1.Control-6.smooth.chrX.cher36	Control	X	117954690	117955392	AML1.Control-6 smooth	1.20563	1.5156	ZCCHC12	170261	ENSG00000174460	117957753	117960931	1	protein_coding	zinc finger, CCHC domain containing 12 [Source:HGNC Symbol;Acc:27273]
AML1.Control-6.smooth.chrX.cher37	Control	X	122913770	122914651	AML1.Control-6 smooth	1.41435	2.87558	CHCHD2P1	NA	ENSG00000226902	122918859	122919301	1	pseudogene	coiled-coil-helix-coiled-coil-helix domain containing 2 pseudogene 1 [Source:HGNC Symbol;Acc:39585]
AML1.Control-6.smooth.chrX.cher39	Control	X	122991072	122991570	AML1.Control-6 smooth	1.20766	1.31235	XIAP	331	ENSG00000101966	122993574	123047829	1	protein_coding	X-linked inhibitor of apoptosis [Source:HGNC Symbol;Acc:592]
AML1.Control-6.smooth.chrX.cher39	Control	X	122991072	122991570	AML1.Control-6 smooth	1.20766	1.31235	Y_RNA	NA	ENSG00000199705	122990912	122991013	-1	misc_RNA	Y RNA [Source:RFAM;Acc:RF00019]
AML1.Control-6.smooth.chrX.cher40	Control	X	123482718	123483355	AML1.Control-6 smooth	1.1065	0.326697	SH2D1A	4068	ENSG00000183918	123480194	123507005	1	protein_coding	SH2 domain containing 1A [Source:HGNC Symbol;Acc:10820]
AML1.Control-6.smooth.chrX.cher41	Control	X	130034365	130035164	AML1.Control-6 smooth	1.63064	4.80148	ENOX2	10495	ENSG00000165675	129751713	130037208	-1	protein_coding	ecto-NOX disulfide-thiol exchanger 2 [Source:HGNC Symbol;Acc:2259]
AML1.Control-6.smooth.chrX.cher42	Control	X	130678108	130678604	AML1.Control-6 smooth	1.33344	1.82418	OR13H1	347468	ENSG00000171054	130677950	130679030	1	protein_coding	olfactory receptor, family 13, subfamily H, member 1 [Source:HGNC Symbol;Acc:14755]
AML1.Control-6.smooth.chrX.cher43	Control	X	134474395	134474986	AML1.Control-6 smooth	1.11313	0.600287	ZNF449	203523	ENSG00000173275	134478721	134497077	1	protein_coding	zinc finger protein 449 [Source:HGNC Symbol;Acc:21039]
AML1.Control-6.smooth.chrX.cher44	Control	X	134475910	134476390	AML1.Control-6 smooth	1.5574	3.29999	ZNF449	203523	ENSG00000173275	134478721	134497077	1	protein_coding	zinc finger protein 449 [Source:HGNC Symbol;Acc:21039]
AML1.Control-6.smooth.chrX.cher44	Control	X	134475910	134476390	AML1.Control-6 smooth	1.5574	3.29999	ZNF75D	7626	ENSG00000186376	134382867	134478012	-1	protein_coding	zinc finger protein 75D [Source:HGNC Symbol;Acc:13145]
AML1.Control-6.smooth.chrX.cher46	Control	X	135723240	135723952	AML1.Control-6 smooth	1.52591	3.38496	CD40LG	959	ENSG00000102245	135730352	135742549	1	protein_coding	CD40 ligand [Source:HGNC Symbol;Acc:11935]
AML1.Control-6.smooth.chrX.cher46	Control	X	135723240	135723952	AML1.Control-6 smooth	1.52591	3.38496	RP3-527F8.2	100128420	ENSG00000233093	135721702	135724588	1	processed_transcript
AML1.Control-6.smooth.chrX.cher47	Control	X	137826678	137827318	AML1.Control-6 smooth	1.37533	2.5559	FGF13	2258	ENSG00000129682	137713735	138304939	-1	protein_coding	fibroblast growth factor 13 [Source:HGNC Symbol;Acc:3670]
AML1.Control-6.smooth.chrX.cher48	Control	X	140276962	140277660	AML1.Control-6 smooth	1.17782	1.37726	LDOC1	23641	ENSG00000182195	140269934	140271310	-1	protein_coding	leucine zipper, down-regulated in cancer 1 [Source:HGNC Symbol;Acc:6548]
AML1.Control-6.smooth.chrX.cher49	Control	X	140924062	140924527	AML1.Control-6 smooth	1.14996	0.734082	MAGEC3	139081	ENSG00000165509	140926102	140985618	1	protein_coding	melanoma antigen family C, 3 [Source:HGNC Symbol;Acc:23798]
AML1.Control-6.smooth.chrX.cher50	Control	X	140990212	140990784	AML1.Control-6 smooth	1.23642	0.927475	MAGEC1	9947	ENSG00000155495	140991680	140997174	1	protein_coding	melanoma antigen family C, 1 [Source:HGNC Symbol;Acc:6812]
AML1.Control-6.smooth.chrX.cher51	Control	X	149735197	149735828	AML1.Control-6 smooth	1.15681	0.433504	MTM1	4534	ENSG00000171100	149737069	149841795	1	protein_coding	myotubularin 1 [Source:HGNC Symbol;Acc:7448]
AML1.Control-6.smooth.chrX.cher53	Control	X	151145578	151146426	AML1.Control-6 smooth	1.52484	4.03147	GABRE	574412	ENSG00000102287	151121596	151143152	-1	protein_coding	gamma-aminobutyric acid (GABA) A receptor, epsilon [Source:HGNC Symbol;Acc:4085]
AML1.Control-6.smooth.chrX.cher54	Control	X	151620152	151620686	AML1.Control-6 smooth	1.21295	1.23708	GABRA3	2556	ENSG00000011677	151334706	151620337	-1	protein_coding	gamma-aminobutyric acid (GABA) A receptor, alpha 3 [Source:HGNC Symbol;Acc:4077]
AML1.Control-6.smooth.chrX.cher55	Control	X	153365024	153365727	AML1.Control-6 smooth	1.5523	2.98237	MECP2	4204	ENSG00000169057	153287024	153402578	-1	protein_coding	methyl CpG binding protein 2 (Rett syndrome) [Source:HGNC Symbol;Acc:6990]
AML1.Control-6.smooth.chrX.cher56	Control	X	154996650	154997108	AML1.Control-6 smooth	1.08225	0.209867	SPRY3	10251	ENSG00000168939	154997474	155012121	1	protein_coding	sprouty homolog 3 (Drosophila) [Source:HGNC Symbol;Acc:11271]
AML1.Control-6.smooth.chrY.cher2	Control	Y	23757478	23757978	AML1.Control-6 smooth	1.09034	0.391134	TTTY13	83868	ENSG00000184991	23745486	23756552	-1	lincRNA	testis-specific transcript, Y-linked 13 (non-protein coding) [Source:HGNC Symbol;Acc:18494]
STAT5.AAA-3.smooth.chr10.cher1	AAA	10	4863982	4864852	STAT5.AAA-3 smooth	1.75361	2.5112	AKR1E2	83592	ENSG00000165568	4828820	4890254	1	protein_coding	aldo-keto reductase family 1, member E2 [Source:HGNC Symbol;Acc:23437]
STAT5.AAA-3.smooth.chr10.cher2	AAA	10	6110320	6111018	STAT5.AAA-3 smooth	1.78909	2.50575	IL2RA	3559	ENSG00000134460	6052652	6104333	-1	protein_coding	interleukin 2 receptor, alpha [Source:HGNC Symbol;Acc:6008]
STAT5.AAA-3.smooth.chr10.cher3	AAA	10	15763002	15763606	STAT5.AAA-3 smooth	1.56434	1.08042	ITGA8	8516	ENSG00000077943	15555948	15762124	-1	protein_coding	integrin, alpha 8 [Source:HGNC Symbol;Acc:6144]
STAT5.AAA-3.smooth.chr10.cher4	AAA	10	23215696	23216286	STAT5.AAA-3 smooth	1.56017	1.29225	ARMC3	219681	ENSG00000165309	23216953	23326518	1	protein_coding	armadillo repeat containing 3 [Source:HGNC Symbol;Acc:30964]
STAT5.AAA-3.smooth.chr10.cher5	AAA	10	24733440	24734144	STAT5.AAA-3 smooth	1.893	2.55271	KIAA1217	56243	ENSG00000120549	23983675	24836772	1	protein_coding	KIAA1217 [Source:HGNC Symbol;Acc:25428]
STAT5.AAA-3.smooth.chr10.cher6	AAA	10	26501450	26502150	STAT5.AAA-3 smooth	1.95255	3.44888	GAD2	2572	ENSG00000136750	26505236	26593487	1	protein_coding	glutamate decarboxylase 2 (pancreatic islets and brain, 65kDa) [Source:HGNC Symbol;Acc:4093]
STAT5.AAA-3.smooth.chr10.cher7	AAA	10	27705082	27705552	STAT5.AAA-3 smooth	1.66335	1.54307	PTCHD3	374308	ENSG00000182077	27687116	27703297	-1	protein_coding	patched domain containing 3 [Source:HGNC Symbol;Acc:24776]
STAT5.AAA-3.smooth.chr10.cher10	AAA	10	52108839	52109344	STAT5.AAA-3 smooth	1.8422	2.65216	SGMS1	259230	ENSG00000198964	52065346	52384795	-1	protein_coding	sphingomyelin synthase 1 [Source:HGNC Symbol;Acc:29799]
STAT5.AAA-3.smooth.chr10.cher13	AAA	10	61470374	61470951	STAT5.AAA-3 smooth	1.51978	0.789659	SLC16A9	220963	ENSG00000165449	61410523	61495760	-1	protein_coding	solute carrier family 16, member 9 (monocarboxylic acid transporter 9) [Source:HGNC Symbol;Acc:23520]
STAT5.AAA-3.smooth.chr10.cher14	AAA	10	65224122	65224642	STAT5.AAA-3 smooth	2.01251	3.18501	JMJD1C	221037	ENSG00000171988	64926981	65225722	-1	protein_coding	jumonji domain containing 1C [Source:HGNC Symbol;Acc:12313]
STAT5.AAA-3.smooth.chr10.cher15	AAA	10	65275882	65276482	STAT5.AAA-3 smooth	1.6944	1.79593	REEP3	221035	ENSG00000165476	65281123	65384883	1	protein_coding	receptor accessory protein 3 [Source:HGNC Symbol;Acc:23711]
STAT5.AAA-3.smooth.chr10.cher16	AAA	10	70844857	70845356	STAT5.AAA-3 smooth	1.76996	2.22856	SRGN	5552	ENSG00000122862	70847862	70864567	1	protein_coding	serglycin [Source:HGNC Symbol;Acc:9361]
STAT5.AAA-3.smooth.chr10.cher17	AAA	10	71556370	71557070	STAT5.AAA-3 smooth	1.72512	1.46806	COL13A1	1305	ENSG00000197467	71561644	71724031	1	protein_coding	collagen, type XIII, alpha 1 [Source:HGNC Symbol;Acc:2190]
STAT5.AAA-3.smooth.chr10.cher18	AAA	10	75685988	75686484	STAT5.AAA-3 smooth	1.49163	0.21601	C10orf55	414236	ENSG00000222047	75669727	75682535	-1	protein_coding	chromosome 10 open reading frame 55 [Source:HGNC Symbol;Acc:31008]
STAT5.AAA-3.smooth.chr10.cher19	AAA	10	75754610	75755124	STAT5.AAA-3 smooth	1.48714	0.37635	VCL	7414	ENSG00000035403	75757872	75879918	1	protein_coding	vinculin [Source:HGNC Symbol;Acc:12665]
STAT5.AAA-3.smooth.chr10.cher20	AAA	10	79742716	79743238	STAT5.AAA-3 smooth	1.78198	2.21566	POLR3A	11128	ENSG00000148606	79729008	79789303	-1	protein_coding	polymerase (RNA) III (DNA directed) polypeptide A, 155kDa [Source:HGNC Symbol;Acc:30074]
STAT5.AAA-3.smooth.chr10.cher22	AAA	10	81962848	81963338	STAT5.AAA-3 smooth	1.63472	1.03478	RP11-40F6.2	439990	ENSG00000237523	81967466	81979413	1	lincRNA
STAT5.AAA-3.smooth.chr10.cher22	AAA	10	81962848	81963338	STAT5.AAA-3 smooth	1.63472	1.03478	ANXA11	311	ENSG00000122359	81910645	81965433	-1	protein_coding	annexin A11 [Source:HGNC Symbol;Acc:535]
STAT5.AAA-3.smooth.chr10.cher23	AAA	10	88128581	88129104	STAT5.AAA-3 smooth	1.73459	1.60094	GRID1	2894	ENSG00000182771	87359312	88126250	-1	protein_coding	glutamate receptor, ionotropic, delta 1 [Source:HGNC Symbol;Acc:4575]
STAT5.AAA-3.smooth.chr10.cher24	AAA	10	88283160	88283641	STAT5.AAA-3 smooth	1.79734	1.03879	WAPAL	23063	ENSG00000062650	88195013	88281572	-1	protein_coding	wings apart-like homolog (Drosophila) [Source:HGNC Symbol;Acc:23293]
STAT5.AAA-3.smooth.chr10.cher25	AAA	10	88852327	88853404	STAT5.AAA-3 smooth	2.1137	6.49038	FAM35A	54537	ENSG00000122376	88854953	88951225	1	protein_coding	family with sequence similarity 35, member A [Source:HGNC Symbol;Acc:28773]
STAT5.AAA-3.smooth.chr10.cher25	AAA	10	88852327	88853404	STAT5.AAA-3 smooth	2.1137	6.49038	RP11-96C23.7	NA	ENSG00000240475	88854266	88856746	1	processed_transcript
STAT5.AAA-3.smooth.chr10.cher25	AAA	10	88852327	88853404	STAT5.AAA-3 smooth	2.1137	6.49038	GLUD1	2746	ENSG00000148672	88810243	88854627	-1	protein_coding	glutamate dehydrogenase 1 [Source:HGNC Symbol;Acc:4335]
STAT5.AAA-3.smooth.chr10.cher26	AAA	10	92917967	92918566	STAT5.AAA-3 smooth	1.74132	2.20319	RP11-56M3.1	NA	ENSG00000234043	92912362	92913106	-1	pseudogene
STAT5.AAA-3.smooth.chr10.cher27	AAA	10	99092269	99092756	STAT5.AAA-3 smooth	1.60956	1.36427	RP11-452K12.4	NA	ENSG00000225850	99094321	99102960	1	antisense
STAT5.AAA-3.smooth.chr10.cher27	AAA	10	99092269	99092756	STAT5.AAA-3 smooth	1.60956	1.36427	FRAT2	23401	ENSG00000181274	99092255	99094458	-1	protein_coding	frequently rearranged in advanced T-cell lymphomas 2 [Source:HGNC Symbol;Acc:16048]
STAT5.AAA-3.smooth.chr10.cher28	AAA	10	99626116	99626646	STAT5.AAA-3 smooth	1.51495	0.735206	RP11-459F3.6	NA	ENSG00000239666	99625988	99631337	1	processed_transcript
STAT5.AAA-3.smooth.chr10.cher29	AAA	10	102109002	102110028	STAT5.AAA-3 smooth	1.84312	4.52976	RP11-34D15.2	NA	ENSG00000231188	102095320	102106147	-1	antisense
STAT5.AAA-3.smooth.chr10.cher29	AAA	10	102109002	102110028	STAT5.AAA-3 smooth	1.84312	4.52976	SCD	6319	ENSG00000099194	102106877	102124591	1	protein_coding	stearoyl-CoA desaturase (delta-9-desaturase) [Source:HGNC Symbol;Acc:10571]
STAT5.AAA-3.smooth.chr10.cher30	AAA	10	103998984	103999660	STAT5.AAA-3 smooth	2.25463	6.17772	GBF1	8729	ENSG00000107862	104005289	104142656	1	protein_coding	golgi brefeldin A resistant guanine nucleotide exchange factor 1 [Source:HGNC Symbol;Acc:4181]
STAT5.AAA-3.smooth.chr10.cher30	AAA	10	103998984	103999660	STAT5.AAA-3 smooth	2.25463	6.17772	PITX3	5309	ENSG00000107859	103989943	104001231	-1	protein_coding	paired-like homeodomain 3 [Source:HGNC Symbol;Acc:9006]
STAT5.AAA-3.smooth.chr10.cher32	AAA	10	105682788	105683478	STAT5.AAA-3 smooth	1.92324	3.58559	OBFC1	79991	ENSG00000107960	105642300	105677963	-1	protein_coding	oligonucleotide/oligosaccharide-binding fold containing 1 [Source:HGNC Symbol;Acc:26200]
STAT5.AAA-3.smooth.chr10.cher33	AAA	10	111672428	111673226	STAT5.AAA-3 smooth	2.18568	5.34672	XPNPEP1	7511	ENSG00000108039	111624524	111683311	-1	protein_coding	X-prolyl aminopeptidase (aminopeptidase P) 1, soluble [Source:HGNC Symbol;Acc:12822]
STAT5.AAA-3.smooth.chr10.cher34	AAA	10	111676340	111676826	STAT5.AAA-3 smooth	1.68853	1.44602	XPNPEP1	7511	ENSG00000108039	111624524	111683311	-1	protein_coding	X-prolyl aminopeptidase (aminopeptidase P) 1, soluble [Source:HGNC Symbol;Acc:12822]
STAT5.AAA-3.smooth.chr10.cher35	AAA	10	111964410	111965086	STAT5.AAA-3 smooth	2.05503	4.84135	MXI1	4601	ENSG00000119950	111967363	112047123	1	protein_coding	MAX interactor 1 [Source:HGNC Symbol;Acc:7534]
STAT5.AAA-3.smooth.chr10.cher36	AAA	10	112718544	112719252	STAT5.AAA-3 smooth	1.60343	1.18161	SHOC2	8036	ENSG00000108061	112679301	112773425	1	protein_coding	soc-2 suppressor of clear homolog (C. elegans) [Source:HGNC Symbol;Acc:15454]
STAT5.AAA-3.smooth.chr10.cher38	AAA	10	116416286	116417292	STAT5.AAA-3 smooth	2.23766	7.0343	ABLIM1	3983	ENSG00000099204	116190872	116444414	-1	protein_coding	actin binding LIM protein 1 [Source:HGNC Symbol;Acc:78]
STAT5.AAA-3.smooth.chr10.cher39	AAA	10	116851378	116851976	STAT5.AAA-3 smooth	1.87248	3.14039	ATRNL1	26033	ENSG00000107518	116853124	117708503	1	protein_coding	attractin-like 1 [Source:HGNC Symbol;Acc:29063]
STAT5.AAA-3.smooth.chr10.cher40	AAA	10	120099546	120100268	STAT5.AAA-3 smooth	1.74848	1.86947	FAM204A	63877	ENSG00000165669	120065401	120101840	-1	protein_coding	family with sequence similarity 204, member A [Source:HGNC Symbol;Acc:25794]
STAT5.AAA-3.smooth.chr10.cher41	AAA	10	120790752	120791262	STAT5.AAA-3 smooth	1.56008	0.993721	RP11-498J9.4	NA	ENSG00000230139	120789351	120790661	-1	antisense
STAT5.AAA-3.smooth.chr10.cher41	AAA	10	120790752	120791262	STAT5.AAA-3 smooth	1.56008	0.993721	NANOS1	340719	ENSG00000188613	120789228	120793854	1	protein_coding	nanos homolog 1 (Drosophila) [Source:HGNC Symbol;Acc:23044]
STAT5.AAA-3.smooth.chr10.cher43	AAA	10	123740292	123740830	STAT5.AAA-3 smooth	1.43745	0.319878	NSMCE4A	54780	ENSG00000107672	123716603	123734732	-1	protein_coding	non-SMC element 4 homolog A (S. cerevisiae) [Source:HGNC Symbol;Acc:25935]
STAT5.AAA-3.smooth.chr10.cher44	AAA	10	123868980	123869489	STAT5.AAA-3 smooth	1.54611	0.451287	TACC2	10579	ENSG00000138162	123748689	124014060	1	protein_coding	transforming, acidic coiled-coil containing protein 2 [Source:HGNC Symbol;Acc:11523]
STAT5.AAA-3.smooth.chr10.cher45	AAA	10	123969683	123970298	STAT5.AAA-3 smooth	1.62769	1.81906	TACC2	10579	ENSG00000138162	123748689	124014060	1	protein_coding	transforming, acidic coiled-coil containing protein 2 [Source:HGNC Symbol;Acc:11523]
STAT5.AAA-3.smooth.chr10.cher46	AAA	10	124023977	124024446	STAT5.AAA-3 smooth	1.62537	1.27234	BTBD16	118663	ENSG00000138152	124030821	124097677	1	protein_coding	BTB (POZ) domain containing 16 [Source:HGNC Symbol;Acc:26340]
STAT5.AAA-3.smooth.chr10.cher47	AAA	10	127516780	127517364	STAT5.AAA-3 smooth	1.69157	1.55562	UROS	7390	ENSG00000188690	127477146	127511817	-1	protein_coding	uroporphyrinogen III synthase [Source:HGNC Symbol;Acc:12592]
STAT5.AAA-3.smooth.chr10.cher47	AAA	10	127516780	127517364	STAT5.AAA-3 smooth	1.69157	1.55562	BCCIP	56647	ENSG00000107949	127512115	127542264	1	protein_coding	BRCA2 and CDKN1A interacting protein [Source:HGNC Symbol;Acc:978]
STAT5.AAA-3.smooth.chr10.cher48	AAA	10	133798073	133798486	STAT5.AAA-3 smooth	1.45521	0.641791	BNIP3	664	ENSG00000176171	133781578	133795435	-1	protein_coding	BCL2/adenovirus E1B 19kDa interacting protein 3 [Source:HGNC Symbol;Acc:1084]
STAT5.AAA-3.smooth.chr11.cher1	AAA	11	241542	242058	STAT5.AAA-3 smooth	1.71841	1.53793	SIRT3	23410	ENSG00000142082	215458	236931	-1	protein_coding	sirtuin 3 [Source:HGNC Symbol;Acc:14931]
STAT5.AAA-3.smooth.chr11.cher1	AAA	11	241542	242058	STAT5.AAA-3 smooth	1.71841	1.53793	PSMD13	5719	ENSG00000185627	236546	252983	1	protein_coding	proteasome (prosome, macropain) 26S subunit, non-ATPase, 13 [Source:HGNC Symbol;Acc:9558]
STAT5.AAA-3.smooth.chr11.cher3	AAA	11	4605198	4606405	STAT5.AAA-3 smooth	1.99479	5.36321	C11orf40	143501	ENSG00000171987	4592653	4599050	-1	protein_coding	chromosome 11 open reading frame 40 [Source:HGNC Symbol;Acc:23986]
STAT5.AAA-3.smooth.chr11.cher3	AAA	11	4605198	4606405	STAT5.AAA-3 smooth	1.99479	5.36321	OR52I2	143502	ENSG00000226288	4608021	4609135	1	protein_coding	olfactory receptor, family 52, subfamily I, member 2 [Source:HGNC Symbol;Acc:15221]
STAT5.AAA-3.smooth.chr11.cher4	AAA	11	4903546	4904046	STAT5.AAA-3 smooth	1.40439	0.330996	OR51T1	401665	ENSG00000176900	4903049	4904113	1	protein_coding	olfactory receptor, family 51, subfamily T, member 1 [Source:HGNC Symbol;Acc:15205]
STAT5.AAA-3.smooth.chr11.cher5	AAA	11	5227749	5228272	STAT5.AAA-3 smooth	1.7624	2.04167	OR51V1	283111	ENSG00000176742	5220965	5221930	-1	protein_coding	olfactory receptor, family 51, subfamily V, member 1 [Source:HGNC Symbol;Acc:19597]
STAT5.AAA-3.smooth.chr11.cher5	AAA	11	5227749	5228272	STAT5.AAA-3 smooth	1.7624	2.04167	AC104389.16	NA	ENSG00000224091	5226271	5228538	1	antisense
STAT5.AAA-3.smooth.chr11.cher9	AAA	11	5601874	5602368	STAT5.AAA-3 smooth	1.677	1.44882	OR52B6	340980	ENSG00000187747	5602107	5603114	1	protein_coding	olfactory receptor, family 52, subfamily B, member 6 [Source:HGNC Symbol;Acc:15211]
STAT5.AAA-3.smooth.chr11.cher10	AAA	11	6485052	6485857	STAT5.AAA-3 smooth	1.9522	4.63371	TRIM3	10612	ENSG00000110171	6469843	6495689	-1	protein_coding	tripartite motif containing 3 [Source:HGNC Symbol;Acc:10064]
STAT5.AAA-3.smooth.chr11.cher11	AAA	11	6674228	6674698	STAT5.AAA-3 smooth	2.16125	3.23046	DCHS1	8642	ENSG00000166341	6642554	6677085	-1	protein_coding	dachsous 1 (Drosophila) [Source:HGNC Symbol;Acc:13681]
STAT5.AAA-3.smooth.chr11.cher12	AAA	11	7533375	7534004	STAT5.AAA-3 smooth	1.57428	0.839611	PPFIBP2	8495	ENSG00000166387	7534529	7678358	1	protein_coding	PTPRF interacting protein, binding protein 2 (liprin beta 2) [Source:HGNC Symbol;Acc:9250]
STAT5.AAA-3.smooth.chr11.cher12	AAA	11	7533375	7534004	STAT5.AAA-3 smooth	1.57428	0.839611	CTD-2516F10.2	100506258	ENSG00000251364	7448497	7533746	-1	antisense
STAT5.AAA-3.smooth.chr11.cher14	AAA	11	8701096	8701976	STAT5.AAA-3 smooth	1.79431	2.96095	RPL27A	619562	ENSG00000166441	8703958	8736306	1	protein_coding	ribosomal protein L27a [Source:HGNC Symbol;Acc:10329]
STAT5.AAA-3.smooth.chr11.cher14	AAA	11	8701096	8701976	STAT5.AAA-3 smooth	1.79431	2.96095	SNORA3	619562	ENSG00000200983	8705774	8705903	1	snoRNA	small nucleolar RNA, H/ACA box 3 [Source:HGNC Symbol;Acc:32586]
STAT5.AAA-3.smooth.chr11.cher14	AAA	11	8701096	8701976	STAT5.AAA-3 smooth	1.79431	2.96095	SNORA45	677826	ENSG00000212607	8706986	8707116	1	snoRNA	small nucleolar RNA, H/ACA box 45 [Source:HGNC Symbol;Acc:32638]
STAT5.AAA-3.smooth.chr11.cher14	AAA	11	8701096	8701976	STAT5.AAA-3 smooth	1.79431	2.96095	RP11-152H18.4	NA	ENSG00000254900	8700636	8702460	1	antisense
STAT5.AAA-3.smooth.chr11.cher15	AAA	11	13981366	13981866	STAT5.AAA-3 smooth	2.01782	3.44806	SPON1	10418	ENSG00000152268	13983914	14289646	1	polymorphic_pseudogene	spondin 1, extracellular matrix protein [Source:HGNC Symbol;Acc:11252]
STAT5.AAA-3.smooth.chr11.cher16	AAA	11	17101124	17101654	STAT5.AAA-3 smooth	1.84048	2.46799	RPS13	100508408	ENSG00000110700	17095936	17099334	-1	protein_coding	ribosomal protein S13 [Source:HGNC Symbol;Acc:10386]
STAT5.AAA-3.smooth.chr11.cher16	AAA	11	17101124	17101654	STAT5.AAA-3 smooth	1.84048	2.46799	SNORD14A	NA	ENSG00000201784	17096201	17096291	-1	snoRNA	small nucleolar RNA, C/D box 14A [Source:HGNC Symbol;Acc:10113]
STAT5.AAA-3.smooth.chr11.cher16	AAA	11	17101124	17101654	STAT5.AAA-3 smooth	1.84048	2.46799	SNORD14B	NA	ENSG00000201403	17097326	17097415	-1	snoRNA	small nucleolar RNA, C/D box 14B [Source:HGNC Symbol;Acc:31803]
STAT5.AAA-3.smooth.chr11.cher17	AAA	11	19139316	19140434	STAT5.AAA-3 smooth	2.13623	6.65227	ZDHHC13	54503	ENSG00000177054	19138646	19197969	1	protein_coding	zinc finger, DHHC-type containing 13 [Source:HGNC Symbol;Acc:18413]
STAT5.AAA-3.smooth.chr11.cher18	AAA	11	26740808	26741478	STAT5.AAA-3 smooth	1.92827	3.27894	SLC5A12	159963	ENSG00000148942	26688566	26744974	-1	protein_coding	solute carrier family 5 (sodium/glucose cotransporter), member 12 [Source:HGNC Symbol;Acc:28750]
STAT5.AAA-3.smooth.chr11.cher19	AAA	11	28126710	28127303	STAT5.AAA-3 smooth	1.89656	3.3087	METTL15	196074	ENSG00000169519	28129795	28355054	1	protein_coding	methyltransferase like 15 [Source:HGNC Symbol;Acc:26606]
STAT5.AAA-3.smooth.chr11.cher19	AAA	11	28126710	28127303	STAT5.AAA-3 smooth	1.89656	3.3087	KIF18A	81930	ENSG00000121621	28042167	28129693	-1	protein_coding	kinesin family member 18A [Source:HGNC Symbol;Acc:29441]
STAT5.AAA-3.smooth.chr11.cher20	AAA	11	31530462	31531166	STAT5.AAA-3 smooth	1.62204	1.80345	ELP4	26610	ENSG00000109911	31531297	31805546	1	protein_coding	elongation protein 4 homolog (S. cerevisiae) [Source:HGNC Symbol;Acc:1171]
STAT5.AAA-3.smooth.chr11.cher20	AAA	11	31530462	31531166	STAT5.AAA-3 smooth	1.62204	1.80345	IMMP1L	196294	ENSG00000148950	31453948	31531192	-1	protein_coding	IMP1 inner mitochondrial membrane peptidase-like (S. cerevisiae) [Source:HGNC Symbol;Acc:26317]
STAT5.AAA-3.smooth.chr11.cher23	AAA	11	35686410	35686884	STAT5.AAA-3 smooth	1.84505	2.3607	TRIM44	54765	ENSG00000166326	35684353	35829775	1	protein_coding	tripartite motif containing 44 [Source:HGNC Symbol;Acc:19016]
STAT5.AAA-3.smooth.chr11.cher24	AAA	11	43697808	43698899	STAT5.AAA-3 smooth	2.04511	6.71186	HSD17B12	51144	ENSG00000149084	43577986	43878167	1	protein_coding	hydroxysteroid (17-beta) dehydrogenase 12 [Source:HGNC Symbol;Acc:18646]
STAT5.AAA-3.smooth.chr11.cher25	AAA	11	45165352	45165818	STAT5.AAA-3 smooth	1.65948	1.58257	PRDM11	101060179	ENSG00000019485	45115564	45247734	1	protein_coding	PR domain containing 11 [Source:HGNC Symbol;Acc:13996]
STAT5.AAA-3.smooth.chr11.cher25	AAA	11	45165352	45165818	STAT5.AAA-3 smooth	1.65948	1.58257	AC103681.1	NA	ENSG00000214934	45168194	45236289	1	protein_coding
STAT5.AAA-3.smooth.chr11.cher26	AAA	11	46148842	46149356	STAT5.AAA-3 smooth	1.55744	1.07637	PHF21A	51317	ENSG00000135365	45950871	46142985	-1	protein_coding	PHD finger protein 21A [Source:HGNC Symbol;Acc:24156]
STAT5.AAA-3.smooth.chr11.cher27	AAA	11	47269378	47269994	STAT5.AAA-3 smooth	1.90214	3.62705	ACP2	53	ENSG00000134575	47260853	47270457	-1	protein_coding	acid phosphatase 2, lysosomal [Source:HGNC Symbol;Acc:123]
STAT5.AAA-3.smooth.chr11.cher27	AAA	11	47269378	47269994	STAT5.AAA-3 smooth	1.90214	3.62705	NR1H3	10062	ENSG00000025434	47269851	47290396	1	protein_coding	nuclear receptor subfamily 1, group H, member 3 [Source:HGNC Symbol;Acc:7966]
STAT5.AAA-3.smooth.chr11.cher28	AAA	11	47793156	47793834	STAT5.AAA-3 smooth	1.61801	1.42678	FNBP4	23360	ENSG00000109920	47738072	47788995	-1	protein_coding	formin binding protein 4 [Source:HGNC Symbol;Acc:19752]
STAT5.AAA-3.smooth.chr11.cher29	AAA	11	48344723	48345350	STAT5.AAA-3 smooth	1.66827	1.68055	OR4C3	256144	ENSG00000176547	48346472	48388665	1	protein_coding	olfactory receptor, family 4, subfamily C, member 3 [Source:HGNC Symbol;Acc:14697]
STAT5.AAA-3.smooth.chr11.cher30	AAA	11	55588204	55588672	STAT5.AAA-3 smooth	1.71243	1.68817	OR5L2	26338	ENSG00000205030	55594695	55595630	1	protein_coding	olfactory receptor, family 5, subfamily L, member 2 [Source:HGNC Symbol;Acc:8351]
STAT5.AAA-3.smooth.chr11.cher31	AAA	11	55860818	55861413	STAT5.AAA-3 smooth	2.00554	3.63955	OR8I2	120586	ENSG00000172154	55860753	55861762	1	protein_coding	olfactory receptor, family 8, subfamily I, member 2 [Source:HGNC Symbol;Acc:15310]
STAT5.AAA-3.smooth.chr11.cher32	AAA	11	56462718	56463214	STAT5.AAA-3 smooth	1.60265	1.17943	OR9G1	390174	ENSG00000174914	56467864	56468781	1	protein_coding	olfactory receptor, family 9, subfamily G, member 1 [Source:HGNC Symbol;Acc:15319]
STAT5.AAA-3.smooth.chr11.cher33	AAA	11	57790003	57790696	STAT5.AAA-3 smooth	1.82268	3.07778	OR9Q1	219956	ENSG00000186509	57791353	57949088	1	protein_coding	olfactory receptor, family 9, subfamily Q, member 1 [Source:HGNC Symbol;Acc:14724]
STAT5.AAA-3.smooth.chr11.cher34	AAA	11	59613820	59614414	STAT5.AAA-3 smooth	1.89055	2.57756	GIF	2694	ENSG00000134812	59596741	59612974	-1	protein_coding	gastric intrinsic factor (vitamin B synthesis) [Source:HGNC Symbol;Acc:4268]
STAT5.AAA-3.smooth.chr11.cher35	AAA	11	60143914	60144496	STAT5.AAA-3 smooth	1.53568	0.429408	MS4A7	58475	ENSG00000166927	60145955	60163424	1	protein_coding	membrane-spanning 4-domains, subfamily A, member 7 [Source:HGNC Symbol;Acc:13378]
STAT5.AAA-3.smooth.chr11.cher35	AAA	11	60143914	60144496	STAT5.AAA-3 smooth	1.53568	0.429408	MS4A14	84689	ENSG00000166928	60146003	60185161	1	protein_coding	membrane-spanning 4-domains, subfamily A, member 14 [Source:HGNC Symbol;Acc:30706]
STAT5.AAA-3.smooth.chr11.cher36	AAA	11	60280020	60280516	STAT5.AAA-3 smooth	1.95592	3.09562	MS4A13	503497	ENSG00000204979	60282886	60310194	1	protein_coding	membrane-spanning 4-domains, subfamily A, member 13 [Source:HGNC Symbol;Acc:16674]
STAT5.AAA-3.smooth.chr11.cher37	AAA	11	61972962	61973462	STAT5.AAA-3 smooth	1.41397	0.370857	SCGB2A1	4246	ENSG00000124939	61976140	61981408	1	protein_coding	secretoglobin, family 2A, member 1 [Source:HGNC Symbol;Acc:7051]
STAT5.AAA-3.smooth.chr11.cher38	AAA	11	62103794	62104290	STAT5.AAA-3 smooth	1.81094	1.7645	ASRGL1	80150	ENSG00000162174	62104920	62160882	1	protein_coding	asparaginase like 1 [Source:HGNC Symbol;Acc:16448]
STAT5.AAA-3.smooth.chr11.cher39	AAA	11	64080058	64080534	STAT5.AAA-3 smooth	2.00086	3.61797	PRDX5	25824	ENSG00000126432	64085560	64089283	1	protein_coding	peroxiredoxin 5 [Source:HGNC Symbol;Acc:9355]
STAT5.AAA-3.smooth.chr11.cher39	AAA	11	64080058	64080534	STAT5.AAA-3 smooth	2.00086	3.61797	ESRRA	2101	ENSG00000173153	64073044	64084215	1	protein_coding	estrogen-related receptor alpha [Source:HGNC Symbol;Acc:3471]
STAT5.AAA-3.smooth.chr11.cher40	AAA	11	64268970	64269650	STAT5.AAA-3 smooth	2.00062	3.90868	AP005273.1	NA	ENSG00000232500	64268325	64272858	1	lincRNA
STAT5.AAA-3.smooth.chr11.cher44	AAA	11	64540958	64541669	STAT5.AAA-3 smooth	1.60902	1.42418	SF1	7536	ENSG00000168066	64532078	64546258	-1	protein_coding	splicing factor 1 [Source:HGNC Symbol;Acc:12950]
STAT5.AAA-3.smooth.chr11.cher45	AAA	11	65766705	65767186	STAT5.AAA-3 smooth	1.82167	1.15209	BANF1	8815	ENSG00000175334	65769550	65771620	1	protein_coding	barrier to autointegration factor 1 [Source:HGNC Symbol;Acc:17397]
STAT5.AAA-3.smooth.chr11.cher45	AAA	11	65766705	65767186	STAT5.AAA-3 smooth	1.82167	1.15209	EIF1AD	84285	ENSG00000175376	65764016	65769647	-1	protein_coding	eukaryotic translation initiation factor 1A domain containing [Source:HGNC Symbol;Acc:28147]
STAT5.AAA-3.smooth.chr11.cher46	AAA	11	66245924	66246624	STAT5.AAA-3 smooth	1.59433	1.54225	DPP3	10072	ENSG00000254986	66247484	66277130	1	protein_coding	dipeptidyl-peptidase 3 [Source:HGNC Symbol;Acc:3008]
STAT5.AAA-3.smooth.chr11.cher46	AAA	11	66245924	66246624	STAT5.AAA-3 smooth	1.59433	1.54225	CTD-3074O7.5	101928069	ENSG00000255517	66240961	66247704	-1	antisense
STAT5.AAA-3.smooth.chr11.cher47	AAA	11	66404046	66404544	STAT5.AAA-3 smooth	1.65689	1.66547	RBM14-RBM4	100526737	ENSG00000248643	66384097	66413940	1	protein_coding	RBM14-RBM4 readthrough [Source:HGNC Symbol;Acc:38840]
STAT5.AAA-3.smooth.chr11.cher47	AAA	11	66404046	66404544	STAT5.AAA-3 smooth	1.65689	1.66547	RBM4	100526737	ENSG00000173933	66406088	66434153	1	protein_coding	RNA binding motif protein 4 [Source:HGNC Symbol;Acc:9901]
STAT5.AAA-3.smooth.chr11.cher48	AAA	11	66673460	66673950	STAT5.AAA-3 smooth	1.56871	1.25837	PC	5091	ENSG00000173599	66615704	66725847	-1	protein_coding	pyruvate carboxylase [Source:HGNC Symbol;Acc:8636]
STAT5.AAA-3.smooth.chr11.cher49	AAA	11	68289252	68289817	STAT5.AAA-3 smooth	1.67086	0.989214	PPP6R3	55291	ENSG00000110075	68228186	68382802	1	protein_coding	protein phosphatase 6, regulatory subunit 3 [Source:HGNC Symbol;Acc:1173]
STAT5.AAA-3.smooth.chr11.cher50	AAA	11	68522170	68522677	STAT5.AAA-3 smooth	1.87423	2.82938	MTL5	9633	ENSG00000132749	68474908	68519032	-1	protein_coding	metallothionein-like 5, testis-specific (tesmin) [Source:HGNC Symbol;Acc:7446]
STAT5.AAA-3.smooth.chr11.cher51	AAA	11	68672646	68673112	STAT5.AAA-3 smooth	1.87929	2.65321	MRPL21	219927	ENSG00000197345	68658744	68671303	-1	protein_coding	mitochondrial ribosomal protein L21 [Source:HGNC Symbol;Acc:14479]
STAT5.AAA-3.smooth.chr11.cher51	AAA	11	68672646	68673112	STAT5.AAA-3 smooth	1.87929	2.65321	IGHMBP2	3508	ENSG00000132740	68671310	68708070	1	protein_coding	immunoglobulin mu binding protein 2 [Source:HGNC Symbol;Acc:5542]
STAT5.AAA-3.smooth.chr11.cher52	AAA	11	70239698	70240368	STAT5.AAA-3 smooth	1.58168	1.70091	CTTN	2017	ENSG00000085733	70244510	70282690	1	protein_coding	cortactin [Source:HGNC Symbol;Acc:3338]
STAT5.AAA-3.smooth.chr11.cher53	AAA	11	73306953	73307716	STAT5.AAA-3 smooth	2.40709	6.92248	FAM168A	23201	ENSG00000054965	73111532	73309234	-1	protein_coding	family with sequence similarity 168, member A [Source:HGNC Symbol;Acc:28999]
STAT5.AAA-3.smooth.chr11.cher54	AAA	11	74174910	74175418	STAT5.AAA-3 smooth	1.75556	2.09585	KCNE3	10008	ENSG00000175538	74165886	74178774	-1	protein_coding	potassium voltage-gated channel, Isk-related family, member 3 [Source:HGNC Symbol;Acc:6243]
STAT5.AAA-3.smooth.chr11.cher55	AAA	11	74304486	74305164	STAT5.AAA-3 smooth	1.48244	0.925869	POLD3	10714	ENSG00000077514	74204896	74380162	1	protein_coding	polymerase (DNA-directed), delta 3, accessory subunit [Source:HGNC Symbol;Acc:20932]
STAT5.AAA-3.smooth.chr11.cher56	AAA	11	76379232	76379742	STAT5.AAA-3 smooth	1.54151	0.982477	RP11-672A2.3	NA	ENSG00000254975	76386123	76414239	1	lincRNA
STAT5.AAA-3.smooth.chr11.cher56	AAA	11	76379232	76379742	STAT5.AAA-3 smooth	1.54151	0.982477	LRRC32	2615	ENSG00000137507	76368568	76381791	-1	protein_coding	leucine rich repeat containing 32 [Source:HGNC Symbol;Acc:4161]
STAT5.AAA-3.smooth.chr11.cher57	AAA	11	77897910	77898692	STAT5.AAA-3 smooth	1.43855	0.748692	USP35	57558	ENSG00000118369	77899858	77925757	1	protein_coding	ubiquitin specific peptidase 35 [Source:HGNC Symbol;Acc:20061]
STAT5.AAA-3.smooth.chr11.cher57	AAA	11	77897910	77898692	STAT5.AAA-3 smooth	1.43855	0.748692	KCTD21	283219	ENSG00000188997	77882295	77899868	-1	protein_coding	potassium channel tetramerisation domain containing 21 [Source:HGNC Symbol;Acc:27452]
STAT5.AAA-3.smooth.chr11.cher58	AAA	11	85436718	85437450	STAT5.AAA-3 smooth	1.71443	2.07562	SYTL2	54843	ENSG00000137501	85405267	85522184	-1	protein_coding	synaptotagmin-like 2 [Source:HGNC Symbol;Acc:15585]
STAT5.AAA-3.smooth.chr11.cher59	AAA	11	93287888	93288399	STAT5.AAA-3 smooth	2.08727	3.83381	AP003499.1	NA	ENSG00000240202	93290079	93290372	1	scRNA_pseudogene
STAT5.AAA-3.smooth.chr11.cher60	AAA	11	94134952	94135454	STAT5.AAA-3 smooth	1.49191	0.83409	GPR83	10888	ENSG00000123901	94110477	94134585	-1	protein_coding	G protein-coupled receptor 83 [Source:HGNC Symbol;Acc:4523]
STAT5.AAA-3.smooth.chr11.cher62	AAA	11	101454654	101455246	STAT5.AAA-3 smooth	1.71699	2.19963	RP11-748H22.1	NA	ENSG00000254506	101455026	101465887	1	pseudogene
STAT5.AAA-3.smooth.chr11.cher62	AAA	11	101454654	101455246	STAT5.AAA-3 smooth	1.71699	2.19963	TRPC6	7225	ENSG00000137672	101322295	101743293	-1	protein_coding	transient receptor potential cation channel, subfamily C, member 6 [Source:HGNC Symbol;Acc:12338]
STAT5.AAA-3.smooth.chr11.cher63	AAA	11	105946728	105947416	STAT5.AAA-3 smooth	1.58841	1.56135	AASDHPPT	60496	ENSG00000149313	105946228	105969437	1	protein_coding	aminoadipate-semialdehyde dehydrogenase-phosphopantetheinyl transferase [Source:HGNC Symbol;Acc:14235]
STAT5.AAA-3.smooth.chr11.cher63	AAA	11	105946728	105947416	STAT5.AAA-3 smooth	1.58841	1.56135	KBTBD3	143879	ENSG00000182359	105921825	105948492	-1	protein_coding	kelch repeat and BTB (POZ) domain containing 3 [Source:HGNC Symbol;Acc:22934]
STAT5.AAA-3.smooth.chr11.cher64	AAA	11	111124160	111124737	STAT5.AAA-3 smooth	1.66522	1.35286	C11orf53	341032	ENSG00000150750	111126707	111157126	1	protein_coding	chromosome 11 open reading frame 53 [Source:HGNC Symbol;Acc:30527]
STAT5.AAA-3.smooth.chr11.cher65	AAA	11	111751684	111752172	STAT5.AAA-3 smooth	1.87138	2.24867	ALG9	79796	ENSG00000086848	111652919	111750145	-1	protein_coding	asparagine-linked glycosylation 9, alpha-1,2-mannosyltransferase homolog (S. cerevisiae) [Source:HGNC Symbol;Acc:15672]
STAT5.AAA-3.smooth.chr11.cher65	AAA	11	111751684	111752172	STAT5.AAA-3 smooth	1.87138	2.24867	RP11-108O10.8	79796	ENSG00000258529	111657010	111750149	-1	protein_coding
STAT5.AAA-3.smooth.chr11.cher65	AAA	11	111751684	111752172	STAT5.AAA-3 smooth	1.87138	2.24867	FDXACB1	91893	ENSG00000255561	111744780	111751967	-1	protein_coding	ferredoxin-fold anticodon binding domain containing 1 [Source:HGNC Symbol;Acc:25110]
STAT5.AAA-3.smooth.chr11.cher65	AAA	11	111751684	111752172	STAT5.AAA-3 smooth	1.87138	2.24867	C11orf1	64776	ENSG00000137720	111749659	111756699	1	protein_coding	chromosome 11 open reading frame 1 [Source:HGNC Symbol;Acc:1163]
STAT5.AAA-3.smooth.chr11.cher66	AAA	11	113351416	113352026	STAT5.AAA-3 smooth	1.81123	2.77767	DRD2	1813	ENSG00000149295	113280318	113346413	-1	protein_coding	dopamine receptor D2 [Source:HGNC Symbol;Acc:3023]
STAT5.AAA-3.smooth.chr11.cher67	AAA	11	113847364	113848054	STAT5.AAA-3 smooth	1.58623	1.17177	HTR3A	3359	ENSG00000166736	113845603	113861035	1	protein_coding	5-hydroxytryptamine (serotonin) receptor 3A, ionotropic [Source:HGNC Symbol;Acc:5297]
STAT5.AAA-3.smooth.chr11.cher68	AAA	11	114167086	114167684	STAT5.AAA-3 smooth	1.82588	2.13175	NNMT	101928916	ENSG00000166741	114128509	114184007	1	protein_coding	nicotinamide N-methyltransferase [Source:HGNC Symbol;Acc:7861]
STAT5.AAA-3.smooth.chr11.cher69	AAA	11	114436931	114437462	STAT5.AAA-3 smooth	2.1268	1.97442	FAM55A	120400	ENSG00000095110	114392437	114430617	-1	protein_coding	family with sequence similarity 55, member A [Source:HGNC Symbol;Acc:28527]
STAT5.AAA-3.smooth.chr11.cher71	AAA	11	116657260	116657964	STAT5.AAA-3 smooth	2.17662	2.99159	ZNF259	8882	ENSG00000109917	116648436	116658766	-1	protein_coding	zinc finger protein 259 [Source:HGNC Symbol;Acc:13051]
STAT5.AAA-3.smooth.chr11.cher72	AAA	11	116734664	116735144	STAT5.AAA-3 smooth	2.02775	3.79956	SIK3	23387	ENSG00000160584	116714118	116969153	-1	protein_coding	SIK family kinase 3 [Source:HGNC Symbol;Acc:29165]
STAT5.AAA-3.smooth.chr11.cher74	AAA	11	118017202	118017880	STAT5.AAA-3 smooth	1.75755	2.95596	SCN4B	6330	ENSG00000177098	118004092	118023603	-1	protein_coding	sodium channel, voltage-gated, type IV, beta subunit [Source:HGNC Symbol;Acc:10592]
STAT5.AAA-3.smooth.chr11.cher75	AAA	11	118171092	118172084	STAT5.AAA-3 smooth	2.39168	8.16308	CD3E	916	ENSG00000198851	118175260	118186890	1	protein_coding	CD3e molecule, epsilon (CD3-TCR complex) [Source:HGNC Symbol;Acc:1674]
STAT5.AAA-3.smooth.chr11.cher76	AAA	11	119256318	119256920	STAT5.AAA-3 smooth	1.98005	3.34444	USP2	9099	ENSG00000036672	119225925	119252436	-1	protein_coding	ubiquitin specific peptidase 2 [Source:HGNC Symbol;Acc:12618]
STAT5.AAA-3.smooth.chr11.cher77	AAA	11	122708759	122709552	STAT5.AAA-3 smooth	1.9595	4.41484	CRTAM	56253	ENSG00000109943	122709208	122743347	1	protein_coding	cytotoxic and regulatory T cell molecule [Source:HGNC Symbol;Acc:24313]
STAT5.AAA-3.smooth.chr11.cher78	AAA	11	122934004	122934520	STAT5.AAA-3 smooth	1.50779	0.80919	HSPA8	85390	ENSG00000109971	122928197	122933938	-1	protein_coding	heat shock 70kDa protein 8 [Source:HGNC Symbol;Acc:5241]
STAT5.AAA-3.smooth.chr11.cher78	AAA	11	122934004	122934520	STAT5.AAA-3 smooth	1.50779	0.80919	SNORD14E	85391	ENSG00000200879	122928785	122928869	-1	snoRNA	small nucleolar RNA, C/D box 14E [Source:HGNC Symbol;Acc:30354]
STAT5.AAA-3.smooth.chr11.cher78	AAA	11	122934004	122934520	STAT5.AAA-3 smooth	1.50779	0.80919	SNORD14D	85390	ENSG00000207118	122929617	122929703	-1	snoRNA	small nucleolar RNA, C/D box 14D [Source:HGNC Symbol;Acc:30353]
STAT5.AAA-3.smooth.chr11.cher78	AAA	11	122934004	122934520	STAT5.AAA-3 smooth	1.50779	0.80919	SNORD14C	85389	ENSG00000202252	122930043	122930130	-1	snoRNA	small nucleolar RNA, C/D box 14C [Source:HGNC Symbol;Acc:30352]
STAT5.AAA-3.smooth.chr11.cher79	AAA	11	125767564	125768240	STAT5.AAA-3 smooth	1.64323	1.37393	PUS3	83480	ENSG00000110060	125763381	125773116	-1	protein_coding	pseudouridylate synthase 3 [Source:HGNC Symbol;Acc:25461]
STAT5.AAA-3.smooth.chr11.cher79	AAA	11	125767564	125768240	STAT5.AAA-3 smooth	1.64323	1.37393	DDX25	29118	ENSG00000109832	125773271	125793158	1	protein_coding	DEAD (Asp-Glu-Ala-Asp) box helicase 25 [Source:HGNC Symbol;Acc:18698]
STAT5.AAA-3.smooth.chr11.cher81	AAA	11	126867960	126868939	STAT5.AAA-3 smooth	1.94041	4.11583	KIRREL3-AS3	283165	ENSG00000218109	126872805	126875953	1	antisense	KIRREL3 antisense RNA 3 (non-protein coding) [Source:HGNC Symbol;Acc:26855]
STAT5.AAA-3.smooth.chr11.cher81	AAA	11	126867960	126868939	STAT5.AAA-3 smooth	1.94041	4.11583	AP002833.1	NA	ENSG00000256527	126873298	126874130	1	pseudogene
STAT5.AAA-3.smooth.chr11.cher81	AAA	11	126867960	126868939	STAT5.AAA-3 smooth	1.94041	4.11583	KIRREL3	84623	ENSG00000149571	126293254	126873355	-1	protein_coding	kin of IRRE like 3 (Drosophila) [Source:HGNC Symbol;Acc:23204]
STAT5.AAA-3.smooth.chr11.cher82	AAA	11	131103340	131103916	STAT5.AAA-3 smooth	1.68595	1.14691	AP002856.7	NA	ENSG00000237612	131104433	131121711	1	lincRNA
STAT5.AAA-3.smooth.chr11.cher84	AAA	11	131409034	131410018	STAT5.AAA-3 smooth	1.92632	4.89879	NTM-IT1	NA	ENSG00000236082	131416556	131443494	1	sense_intronic	NTM intronic transcript 1 (non-protein coding) [Source:HGNC Symbol;Acc:41435]
STAT5.AAA-3.smooth.chr11.cher84	AAA	11	131409034	131410018	STAT5.AAA-3 smooth	1.92632	4.89879	AP003025.2	101929653	ENSG00000237654	131372653	131410761	-1	antisense
STAT5.AAA-3.smooth.chr11.cher85	AAA	11	134099390	134100106	STAT5.AAA-3 smooth	1.82687	3.04383	NCAPD3	23310	ENSG00000151503	134020014	134095348	-1	protein_coding	non-SMC condensin II complex, subunit D3 [Source:HGNC Symbol;Acc:28952]
STAT5.AAA-3.smooth.chr11.cher85	AAA	11	134099390	134100106	STAT5.AAA-3 smooth	1.82687	3.04383	VPS26B	112936	ENSG00000151502	134094539	134117686	1	protein_coding	vacuolar protein sorting 26 homolog B (S. pombe) [Source:HGNC Symbol;Acc:28119]
STAT5.AAA-3.smooth.chr12.cher2	AAA	12	6059044	6059638	STAT5.AAA-3 smooth	1.70229	2.15164	ANO2	57101	ENSG00000047617	5641035	6055398	-1	protein_coding	anoctamin 2 [Source:HGNC Symbol;Acc:1183]
STAT5.AAA-3.smooth.chr12.cher3	AAA	12	6753716	6754226	STAT5.AAA-3 smooth	1.90561	2.5509	LPAR5	57121	ENSG00000184574	6728001	6750426	-1	protein_coding	lysophosphatidic acid receptor 5 [Source:HGNC Symbol;Acc:13307]
STAT5.AAA-3.smooth.chr12.cher3	AAA	12	6753716	6754226	STAT5.AAA-3 smooth	1.90561	2.5509	ACRBP	84519	ENSG00000111644	6747241	6756626	-1	protein_coding	acrosin binding protein [Source:HGNC Symbol;Acc:17195]
STAT5.AAA-3.smooth.chr12.cher4	AAA	12	6866571	6867092	STAT5.AAA-3 smooth	1.82201	1.50641	MLF2	8079	ENSG00000089693	6857170	6876641	-1	protein_coding	myeloid leukemia factor 2 [Source:HGNC Symbol;Acc:7126]
STAT5.AAA-3.smooth.chr12.cher5	AAA	12	7031878	7032878	STAT5.AAA-3 smooth	1.88361	2.95657	ATN1	1822	ENSG00000111676	7033626	7051484	1	protein_coding	atrophin 1 [Source:HGNC Symbol;Acc:3033]
STAT5.AAA-3.smooth.chr12.cher6	AAA	12	7284924	7285404	STAT5.AAA-3 smooth	1.49766	0.635722	RP11-273B20.1	NA	ENSG00000256967	7281675	7283794	-1	antisense
STAT5.AAA-3.smooth.chr12.cher6	AAA	12	7284924	7285404	STAT5.AAA-3 smooth	1.49766	0.635722	RBP5	83758	ENSG00000139194	7276280	7281538	-1	protein_coding	retinol binding protein 5, cellular [Source:HGNC Symbol;Acc:15847]
STAT5.AAA-3.smooth.chr12.cher6	AAA	12	7284924	7285404	STAT5.AAA-3 smooth	1.49766	0.635722	CLSTN3	9746	ENSG00000139182	7282294	7311541	1	protein_coding	calsyntenin 3 [Source:HGNC Symbol;Acc:18371]
STAT5.AAA-3.smooth.chr12.cher7	AAA	12	8814828	8815352	STAT5.AAA-3 smooth	1.47965	0.658253	MFAP5	8076	ENSG00000197614	8789942	8815484	-1	protein_coding	microfibrillar associated protein 5 [Source:HGNC Symbol;Acc:29673]
STAT5.AAA-3.smooth.chr12.cher7	AAA	12	8814828	8815352	STAT5.AAA-3 smooth	1.47965	0.658253	RP11-20D14.3	NA	ENSG00000255829	8816607	8821607	1	antisense
STAT5.AAA-3.smooth.chr12.cher8	AAA	12	9016015	9016642	STAT5.AAA-3 smooth	1.59702	1.23874	A2ML1	144568	ENSG00000166535	8975068	9039597	1	protein_coding	alpha-2-macroglobulin-like 1 [Source:HGNC Symbol;Acc:23336]
STAT5.AAA-3.smooth.chr12.cher9	AAA	12	10874330	10874924	STAT5.AAA-3 smooth	1.80531	2.95778	CSDA	8531	ENSG00000060138	10851683	10875911	-1	protein_coding	cold shock domain protein A [Source:HGNC Symbol;Acc:2428]
STAT5.AAA-3.smooth.chr12.cher10	AAA	12	10984254	10984740	STAT5.AAA-3 smooth	2.07988	3.94711	TAS2R10	50839	ENSG00000121318	10977916	10978957	-1	protein_coding	taste receptor, type 2, member 10 [Source:HGNC Symbol;Acc:14918]
STAT5.AAA-3.smooth.chr12.cher10	AAA	12	10984254	10984740	STAT5.AAA-3 smooth	2.07988	3.94711	RP11-144O23.8	NA	ENSG00000256651	10983673	10984615	-1	pseudogene
STAT5.AAA-3.smooth.chr12.cher11	AAA	12	11060938	11061426	STAT5.AAA-3 smooth	2.08479	4.41924	TAS2R13	50838	ENSG00000212128	11060525	11062161	-1	protein_coding	taste receptor, type 2, member 13 [Source:HGNC Symbol;Acc:14919]
STAT5.AAA-3.smooth.chr12.cher12	AAA	12	14997120	14997618	STAT5.AAA-3 smooth	1.65164	1.5671	ART4	420	ENSG00000111339	14978503	14996429	-1	protein_coding	ADP-ribosyltransferase 4 (Dombrock blood group) [Source:HGNC Symbol;Acc:726]
STAT5.AAA-3.smooth.chr12.cher13	AAA	12	15094911	15095406	STAT5.AAA-3 smooth	1.49028	0.360816	ERP27	121506	ENSG00000139055	15066969	15092016	-1	protein_coding	endoplasmic reticulum protein 27 [Source:HGNC Symbol;Acc:26495]
STAT5.AAA-3.smooth.chr12.cher14	AAA	12	16060932	16061434	STAT5.AAA-3 smooth	1.54185	1.01948	DERA	51071	ENSG00000023697	16064106	16190220	1	protein_coding	deoxyribose-phosphate aldolase (putative) [Source:HGNC Symbol;Acc:24269]
STAT5.AAA-3.smooth.chr12.cher15	AAA	12	18242554	18243240	STAT5.AAA-3 smooth	2.4198	3.844	RERGL	79785	ENSG00000111404	18233803	18473041	-1	protein_coding	RERG/RAS-like [Source:HGNC Symbol;Acc:26213]
STAT5.AAA-3.smooth.chr12.cher16	AAA	12	25348386	25349064	STAT5.AAA-3 smooth	1.53583	1.26	CASC1	55259	ENSG00000118307	25261354	25348096	-1	protein_coding	cancer susceptibility candidate 1 [Source:HGNC Symbol;Acc:29599]
STAT5.AAA-3.smooth.chr12.cher16	AAA	12	25348386	25349064	STAT5.AAA-3 smooth	1.53583	1.26	LYRM5	144363	ENSG00000205707	25348150	25362579	1	protein_coding	LYR motif containing 5 [Source:HGNC Symbol;Acc:27052]
STAT5.AAA-3.smooth.chr12.cher17	AAA	12	27484340	27485246	STAT5.AAA-3 smooth	2.09806	5.58671	ARNTL2	56938	ENSG00000029153	27485787	27576241	1	protein_coding	aryl hydrocarbon receptor nuclear translocator-like 2 [Source:HGNC Symbol;Acc:18984]
STAT5.AAA-3.smooth.chr12.cher18	AAA	12	29939618	29940132	STAT5.AAA-3 smooth	1.58443	0.985465	TMTC1	83857	ENSG00000133687	29653757	29937692	-1	protein_coding	transmembrane and tetratricopeptide repeat containing 1 [Source:HGNC Symbol;Acc:24099]
STAT5.AAA-3.smooth.chr12.cher19	AAA	12	32654838	32655520	STAT5.AAA-3 smooth	1.78617	2.91978	FGD4	121512	ENSG00000139132	32552463	32798984	1	protein_coding	FYVE, RhoGEF and PH domain containing 4 [Source:HGNC Symbol;Acc:19125]
STAT5.AAA-3.smooth.chr12.cher20	AAA	12	42981632	42982112	STAT5.AAA-3 smooth	2.24406	4.80684	PRICKLE1	144165	ENSG00000139174	42852140	42984157	-1	protein_coding	prickle homolog 1 (Drosophila) [Source:HGNC Symbol;Acc:17019]
STAT5.AAA-3.smooth.chr12.cher21	AAA	12	46664218	46664806	STAT5.AAA-3 smooth	1.52852	0.732448	SLC38A1	81539	ENSG00000111371	46581584	46663800	-1	protein_coding	solute carrier family 38, member 1 [Source:HGNC Symbol;Acc:13447]
STAT5.AAA-3.smooth.chr12.cher23	AAA	12	48543642	48544152	STAT5.AAA-3 smooth	1.73256	2.1426	ASB8	140461	ENSG00000177981	48541571	48574996	-1	protein_coding	ankyrin repeat and SOCS box containing 8 [Source:HGNC Symbol;Acc:17183]
STAT5.AAA-3.smooth.chr12.cher24	AAA	12	49449261	49450552	STAT5.AAA-3 smooth	2.53778	11.1279	MLL2	8085	ENSG00000167548	49412758	49453557	-1	protein_coding	myeloid/lymphoid or mixed-lineage leukemia 2 [Source:HGNC Symbol;Acc:7133]
STAT5.AAA-3.smooth.chr12.cher25	AAA	12	50240688	50241280	STAT5.AAA-3 smooth	2.05172	3.8163	BCDIN3D	144233	ENSG00000186666	50231573	50236912	-1	protein_coding	BCDIN3 domain containing [Source:HGNC Symbol;Acc:27050]
STAT5.AAA-3.smooth.chr12.cher26	AAA	12	50558261	50558758	STAT5.AAA-3 smooth	1.8789	2.42772	CERS5	91012	ENSG00000139624	50523575	50561288	-1	protein_coding	ceramide synthase 5 [Source:HGNC Symbol;Acc:23749]
STAT5.AAA-3.smooth.chr12.cher27	AAA	12	52713418	52713916	STAT5.AAA-3 smooth	1.63627	1.5783	RP11-259K21.3	NA	ENSG00000257540	52679697	52709719	-1	processed_transcript
STAT5.AAA-3.smooth.chr12.cher27	AAA	12	52713418	52713916	STAT5.AAA-3 smooth	1.63627	1.5783	KRT83	3889	ENSG00000170523	52708085	52715182	-1	protein_coding	keratin 83 [Source:HGNC Symbol;Acc:6460]
STAT5.AAA-3.smooth.chr12.cher28	AAA	12	53837570	53838086	STAT5.AAA-3 smooth	1.53619	1.03731	RP11-793H13.8	NA	ENSG00000257379	53835525	53861312	1	processed_transcript
STAT5.AAA-3.smooth.chr12.cher28	AAA	12	53837570	53838086	STAT5.AAA-3 smooth	1.53619	1.03731	PRR13	54458	ENSG00000205352	53835389	53840429	1	protein_coding	proline rich 13 [Source:HGNC Symbol;Acc:24528]
STAT5.AAA-3.smooth.chr12.cher28	AAA	12	53837570	53838086	STAT5.AAA-3 smooth	1.53619	1.03731	PCBP2	5094	ENSG00000197111	53835525	53874946	1	protein_coding	poly(rC) binding protein 2 [Source:HGNC Symbol;Acc:8648]
STAT5.AAA-3.smooth.chr12.cher29	AAA	12	54118470	54119066	STAT5.AAA-3 smooth	2.42053	7.23455	CALCOCO1	57658	ENSG00000012822	54104902	54121529	-1	protein_coding	calcium binding and coiled-coil domain 1 [Source:HGNC Symbol;Acc:29306]
STAT5.AAA-3.smooth.chr12.cher30	AAA	12	54782124	54782734	STAT5.AAA-3 smooth	1.37057	0.15074	ZNF385A	25946	ENSG00000161642	54762917	54785082	-1	protein_coding	zinc finger protein 385A [Source:HGNC Symbol;Acc:17521]
STAT5.AAA-3.smooth.chr12.cher31	AAA	12	54786326	54786806	STAT5.AAA-3 smooth	1.73001	1.92536	ZNF385A	25946	ENSG00000161642	54762917	54785082	-1	protein_coding	zinc finger protein 385A [Source:HGNC Symbol;Acc:17521]
STAT5.AAA-3.smooth.chr12.cher32	AAA	12	54953698	54954216	STAT5.AAA-3 smooth	2.11909	3.97286	PDE1B	5153	ENSG00000123360	54943134	54973023	1	protein_coding	phosphodiesterase 1B, calmodulin-dependent [Source:HGNC Symbol;Acc:8775]
STAT5.AAA-3.smooth.chr12.cher33	AAA	12	55039282	55039782	STAT5.AAA-3 smooth	1.97036	3.15552	DCD	117159	ENSG00000161634	55038375	55042277	-1	protein_coding	dermcidin [Source:HGNC Symbol;Acc:14669]
STAT5.AAA-3.smooth.chr12.cher34	AAA	12	57479148	57480144	STAT5.AAA-3 smooth	2.40115	7.71932	TMEM194A	23306	ENSG00000166881	57449426	57481846	-1	protein_coding	transmembrane protein 194A [Source:HGNC Symbol;Acc:29001]
STAT5.AAA-3.smooth.chr12.cher34	AAA	12	57479148	57480144	STAT5.AAA-3 smooth	2.40115	7.71932	NAB2	4665	ENSG00000166886	57482677	57489259	1	protein_coding	NGFI-A binding protein 2 (EGR1 binding protein 2) [Source:HGNC Symbol;Acc:7627]
STAT5.AAA-3.smooth.chr12.cher35	AAA	12	57524532	57525510	STAT5.AAA-3 smooth	2.71301	9.46546	STAT6	6778	ENSG00000166888	57489191	57525922	-1	protein_coding	signal transducer and activator of transcription 6, interleukin-4 induced [Source:HGNC Symbol;Acc:11368]
STAT5.AAA-3.smooth.chr12.cher35	AAA	12	57524532	57525510	STAT5.AAA-3 smooth	2.71301	9.46546	LRP1	4035	ENSG00000123384	57522276	57607134	1	protein_coding	low density lipoprotein receptor-related protein 1 [Source:HGNC Symbol;Acc:6692]
STAT5.AAA-3.smooth.chr12.cher36	AAA	12	57926655	57927250	STAT5.AAA-3 smooth	2.25778	3.28446	DCTN2	10540	ENSG00000175203	57923885	57941114	-1	protein_coding	dynactin 2 (p50) [Source:HGNC Symbol;Acc:2712]
STAT5.AAA-3.smooth.chr12.cher37	AAA	12	58334210	58334690	STAT5.AAA-3 smooth	1.52363	0.451166	RP11-620J15.3	100506844	ENSG00000257698	58325311	58329958	-1	processed_transcript
STAT5.AAA-3.smooth.chr12.cher37	AAA	12	58334210	58334690	STAT5.AAA-3 smooth	1.52363	0.451166	XRCC6BP1	91419	ENSG00000166896	58335324	58351052	1	protein_coding	XRCC6 binding protein 1 [Source:HGNC Symbol;Acc:29452]
STAT5.AAA-3.smooth.chr12.cher38	AAA	12	59316785	59317395	STAT5.AAA-3 smooth	2.0078	4.13717	LRIG3	121227	ENSG00000139263	59265931	59314303	-1	protein_coding	leucine-rich repeats and immunoglobulin-like domains 3 [Source:HGNC Symbol;Acc:30991]
STAT5.AAA-3.smooth.chr12.cher38	AAA	12	59316785	59317395	STAT5.AAA-3 smooth	2.0078	4.13717	RP11-150C16.1	NA	ENSG00000257443	59314420	59458019	1	antisense
STAT5.AAA-3.smooth.chr12.cher39	AAA	12	66213184	66213670	STAT5.AAA-3 smooth	1.73879	1.04926	HMGA2	8091	ENSG00000149948	66217911	66360075	1	protein_coding	high mobility group AT-hook 2 [Source:HGNC Symbol;Acc:5009]
STAT5.AAA-3.smooth.chr12.cher40	AAA	12	72081510	72082004	STAT5.AAA-3 smooth	1.81253	1.28134	TMEM19	55266	ENSG00000139291	72079867	72097836	1	protein_coding	transmembrane protein 19 [Source:HGNC Symbol;Acc:25605]
STAT5.AAA-3.smooth.chr12.cher41	AAA	12	91402340	91402842	STAT5.AAA-3 smooth	1.76107	2.46093	EPYC	1833	ENSG00000083782	91357456	91398803	-1	protein_coding	epiphycan [Source:HGNC Symbol;Acc:3053]
STAT5.AAA-3.smooth.chr12.cher42	AAA	12	91405042	91405644	STAT5.AAA-3 smooth	1.75063	1.66371	EPYC	1833	ENSG00000083782	91357456	91398803	-1	protein_coding	epiphycan [Source:HGNC Symbol;Acc:3053]
STAT5.AAA-3.smooth.chr12.cher43	AAA	12	95869148	95869878	STAT5.AAA-3 smooth	1.37883	0.109155	METAP2	10988	ENSG00000111142	95867296	95909615	1	protein_coding	methionyl aminopeptidase 2 [Source:HGNC Symbol;Acc:16672]
STAT5.AAA-3.smooth.chr12.cher44	AAA	12	96387238	96388040	STAT5.AAA-3 smooth	1.60142	1.66842	RP11-256L6.3	NA	ENSG00000257878	96390299	96405267	1	processed_transcript
STAT5.AAA-3.smooth.chr12.cher44	AAA	12	96387238	96388040	STAT5.AAA-3 smooth	1.60142	1.66842	HAL	3034	ENSG00000084110	96366440	96390143	-1	protein_coding	histidine ammonia-lyase [Source:HGNC Symbol;Acc:4806]
STAT5.AAA-3.smooth.chr12.cher45	AAA	12	101444090	101444620	STAT5.AAA-3 smooth	1.88975	1.89653	ANO4	121601	ENSG00000151572	101111304	101522419	1	protein_coding	anoctamin 4 [Source:HGNC Symbol;Acc:23837]
STAT5.AAA-3.smooth.chr12.cher46	AAA	12	102088875	102089374	STAT5.AAA-3 smooth	2.01762	2.21763	CHPT1	56994	ENSG00000111666	102090725	102137918	1	protein_coding	choline phosphotransferase 1 [Source:HGNC Symbol;Acc:17852]
STAT5.AAA-3.smooth.chr12.cher48	AAA	12	106745340	106745851	STAT5.AAA-3 smooth	1.59531	1.01815	POLR3B	55703	ENSG00000013503	106751436	106903976	1	protein_coding	polymerase (RNA) III (DNA directed) polypeptide B [Source:HGNC Symbol;Acc:30348]
STAT5.AAA-3.smooth.chr12.cher49	AAA	12	109254313	109254788	STAT5.AAA-3 smooth	2.00146	3.44989	SSH1	54434	ENSG00000084112	109176466	109251366	-1	protein_coding	slingshot homolog 1 (Drosophila) [Source:HGNC Symbol;Acc:30579]
STAT5.AAA-3.smooth.chr12.cher49	AAA	12	109254313	109254788	STAT5.AAA-3 smooth	2.00146	3.44989	DAO	1610	ENSG00000110887	109252708	109294819	1	protein_coding	D-amino-acid oxidase [Source:HGNC Symbol;Acc:2671]
STAT5.AAA-3.smooth.chr12.cher50	AAA	12	111285846	111286766	STAT5.AAA-3 smooth	2.28867	4.77682	RPL29P25	NA	ENSG00000241286	111279342	111280191	-1	pseudogene	ribosomal protein L29 pseudogene 25 [Source:HGNC Symbol;Acc:37039]
STAT5.AAA-3.smooth.chr12.cher50	AAA	12	111285846	111286766	STAT5.AAA-3 smooth	2.28867	4.77682	CCDC63	160762	ENSG00000173093	111284573	111345339	1	protein_coding	coiled-coil domain containing 63 [Source:HGNC Symbol;Acc:26669]
STAT5.AAA-3.smooth.chr12.cher51	AAA	12	112120802	112121266	STAT5.AAA-3 smooth	2.20452	5.13767	BRAP	8315	ENSG00000089234	112080797	112123790	-1	protein_coding	BRCA1 associated protein [Source:HGNC Symbol;Acc:1099]
STAT5.AAA-3.smooth.chr12.cher51	AAA	12	112120802	112121266	STAT5.AAA-3 smooth	2.20452	5.13767	ACAD10	80724	ENSG00000111271	112123857	112194903	1	protein_coding	acyl-CoA dehydrogenase family, member 10 [Source:HGNC Symbol;Acc:21597]
STAT5.AAA-3.smooth.chr12.cher52	AAA	12	116444692	116445174	STAT5.AAA-3 smooth	1.80439	2.4859	MED13L	23389	ENSG00000123066	116395711	116715143	-1	protein_coding	mediator complex subunit 13-like [Source:HGNC Symbol;Acc:22962]
STAT5.AAA-3.smooth.chr12.cher53	AAA	12	116713706	116714266	STAT5.AAA-3 smooth	2.28345	5.71727	MED13L	23389	ENSG00000123066	116395711	116715143	-1	protein_coding	mediator complex subunit 13-like [Source:HGNC Symbol;Acc:22962]
STAT5.AAA-3.smooth.chr12.cher54	AAA	12	120967405	120967910	STAT5.AAA-3 smooth	1.51995	0.554457	RPL29P24	NA	ENSG00000241030	120960467	120961246	-1	pseudogene	ribosomal protein L29 pseudogene 24 [Source:HGNC Symbol;Acc:35616]
STAT5.AAA-3.smooth.chr12.cher54	AAA	12	120967405	120967910	STAT5.AAA-3 smooth	1.51995	0.554457	COQ5	84274	ENSG00000110871	120941077	120972237	-1	protein_coding	coenzyme Q5 homolog, methyltransferase (S. cerevisiae) [Source:HGNC Symbol;Acc:28722]
STAT5.AAA-3.smooth.chr12.cher54	AAA	12	120967405	120967910	STAT5.AAA-3 smooth	1.51995	0.554457	RNF10	9921	ENSG00000022840	120971283	121015397	1	protein_coding	ring finger protein 10 [Source:HGNC Symbol;Acc:10055]
STAT5.AAA-3.smooth.chr12.cher55	AAA	12	123381190	123381980	STAT5.AAA-3 smooth	1.81262	3.39622	VPS37B	79720	ENSG00000139722	123349882	123380991	-1	protein_coding	vacuolar protein sorting 37 homolog B (S. cerevisiae) [Source:HGNC Symbol;Acc:25754]
STAT5.AAA-3.smooth.chr12.cher56	AAA	12	125347276	125347752	STAT5.AAA-3 smooth	1.9672	2.63467	SCARB1	949	ENSG00000073060	125261606	125367214	-1	protein_coding	scavenger receptor class B, member 1 [Source:HGNC Symbol;Acc:1664]
STAT5.AAA-3.smooth.chr13.cher1	AAA	13	22242910	22243404	STAT5.AAA-3 smooth	1.63206	1.02295	FGF9	2254	ENSG00000102678	22245522	22278637	1	protein_coding	fibroblast growth factor 9 (glia-activating factor) [Source:HGNC Symbol;Acc:3687]
STAT5.AAA-3.smooth.chr13.cher2	AAA	13	25870022	25870720	STAT5.AAA-3 smooth	1.62006	1.52885	RP11-271M24.2	NA	ENSG00000260509	25874262	25875576	1	antisense
STAT5.AAA-3.smooth.chr13.cher2	AAA	13	25870022	25870720	STAT5.AAA-3 smooth	1.62006	1.52885	NUPL1	9818	ENSG00000139496	25875662	25923938	1	protein_coding	nucleoporin like 1 [Source:HGNC Symbol;Acc:20261]
STAT5.AAA-3.smooth.chr13.cher3	AAA	13	26793782	26794378	STAT5.AAA-3 smooth	1.4656	0.619339	RNF6	6049	ENSG00000127870	26706253	26796791	-1	protein_coding	ring finger protein (C3H2C3 type) 6 [Source:HGNC Symbol;Acc:10069]
STAT5.AAA-3.smooth.chr13.cher4	AAA	13	29226400	29227090	STAT5.AAA-3 smooth	1.6891	1.47371	POMP	51371	ENSG00000132963	29233241	29253062	1	protein_coding	proteasome maturation protein [Source:HGNC Symbol;Acc:20330]
STAT5.AAA-3.smooth.chr13.cher5	AAA	13	29235702	29236212	STAT5.AAA-3 smooth	1.57898	0.863305	POMP	51371	ENSG00000132963	29233241	29253062	1	protein_coding	proteasome maturation protein [Source:HGNC Symbol;Acc:20330]
STAT5.AAA-3.smooth.chr13.cher11	AAA	13	31503072	31503692	STAT5.AAA-3 smooth	1.98061	3.07994	TEX26	122046	ENSG00000175664	31506840	31549639	1	protein_coding	testis expressed 26 [Source:HGNC Symbol;Acc:28622]
STAT5.AAA-3.smooth.chr13.cher12	AAA	13	33763580	33764284	STAT5.AAA-3 smooth	1.8539	2.25729	STARD13	90627	ENSG00000133121	33677307	33924767	-1	protein_coding	StAR-related lipid transfer (START) domain containing 13 [Source:HGNC Symbol;Acc:19164]
STAT5.AAA-3.smooth.chr13.cher13	AAA	13	34394368	34394868	STAT5.AAA-3 smooth	1.67697	1.67925	RFC3	5983	ENSG00000133119	34392186	34540695	1	protein_coding	replication factor C (activator 1) 3, 38kDa [Source:HGNC Symbol;Acc:9971]
STAT5.AAA-3.smooth.chr13.cher14	AAA	13	37246778	37247304	STAT5.AAA-3 smooth	2.38164	5.18112	SERTM1	400120	ENSG00000180440	37248049	37271976	1	protein_coding	serine-rich and transmembrane domain containing 1 [Source:HGNC Symbol;Acc:33792]
STAT5.AAA-3.smooth.chr13.cher15	AAA	13	37495510	37496534	STAT5.AAA-3 smooth	1.68515	3.01812	LAMTOR3P1	NA	ENSG00000228825	37496676	37497045	1	pseudogene	late endosomal/lysosomal adaptor, MAPK and MTOR activator 3 pseudogene 1 [Source:HGNC Symbol;Acc:39726]
STAT5.AAA-3.smooth.chr13.cher15	AAA	13	37495510	37496534	STAT5.AAA-3 smooth	1.68515	3.01812	SMAD9	4093	ENSG00000120693	37418968	37494902	-1	protein_coding	SMAD family member 9 [Source:HGNC Symbol;Acc:6774]
STAT5.AAA-3.smooth.chr13.cher16	AAA	13	38922740	38923422	STAT5.AAA-3 smooth	1.73639	2.83279	UFM1	51569	ENSG00000120686	38923986	38937140	1	protein_coding	ubiquitin-fold modifier 1 [Source:HGNC Symbol;Acc:20597]
STAT5.AAA-3.smooth.chr13.cher17	AAA	13	41882142	41882748	STAT5.AAA-3 smooth	1.67754	1.41703	NAA16	79612	ENSG00000172766	41885341	41951166	1	protein_coding	N(alpha)-acetyltransferase 16, NatA auxiliary subunit [Source:HGNC Symbol;Acc:26164]
STAT5.AAA-3.smooth.chr13.cher18	AAA	13	51646172	51646782	STAT5.AAA-3 smooth	1.87385	2.92174	GUCY1B2	2974	ENSG00000123201	51568651	51654998	-1	pseudogene	guanylate cyclase 1, soluble, beta 2 [Source:HGNC Symbol;Acc:4686]
STAT5.AAA-3.smooth.chr13.cher19	AAA	13	76196326	76196920	STAT5.AAA-3 smooth	1.72049	1.98699	LMO7	4008	ENSG00000136153	76194570	76434004	1	protein_coding	LIM domain 7 [Source:HGNC Symbol;Acc:6646]
STAT5.AAA-3.smooth.chr13.cher20	AAA	13	99384369	99384850	STAT5.AAA-3 smooth	1.95556	3.51174	SLC15A1	6564	ENSG00000088386	99336898	99404908	-1	protein_coding	solute carrier family 15 (oligopeptide transporter), member 1 [Source:HGNC Symbol;Acc:10920]
STAT5.AAA-3.smooth.chr13.cher21	AAA	13	99960412	99961314	STAT5.AAA-3 smooth	1.78602	3.06349	UBAC2	337867	ENSG00000134882	99853028	100038688	1	protein_coding	UBA domain containing 2 [Source:HGNC Symbol;Acc:20486]
STAT5.AAA-3.smooth.chr13.cher21	AAA	13	99960412	99961314	STAT5.AAA-3 smooth	1.78602	3.06349	GPR183	1880	ENSG00000169508	99946784	99959659	-1	protein_coding	G protein-coupled receptor 183 [Source:HGNC Symbol;Acc:3128]
STAT5.AAA-3.smooth.chr13.cher22	AAA	13	103244009	103244478	STAT5.AAA-3 smooth	1.83957	2.06922	RP11-29B2.4	NA	ENSG00000261057	103241722	103242163	-1	antisense
STAT5.AAA-3.smooth.chr13.cher22	AAA	13	103244009	103244478	STAT5.AAA-3 smooth	1.83957	2.06922	TPP2	7174	ENSG00000134900	103249353	103331521	1	protein_coding	tripeptidyl peptidase II [Source:HGNC Symbol;Acc:12016]
STAT5.AAA-3.smooth.chr13.cher23	AAA	13	109440772	109441656	STAT5.AAA-3 smooth	1.72028	2.4092	MYO16	23026	ENSG00000041515	109248500	109860355	1	protein_coding	myosin XVI [Source:HGNC Symbol;Acc:29822]
STAT5.AAA-3.smooth.chr13.cher26	AAA	13	113856320	113856824	STAT5.AAA-3 smooth	1.72527	0.938864	PCID2	55795	ENSG00000126226	113831891	113863029	-1	protein_coding	PCI domain containing 2 [Source:HGNC Symbol;Acc:25653]
STAT5.AAA-3.smooth.chr13.cher26	AAA	13	113856320	113856824	STAT5.AAA-3 smooth	1.72527	0.938864	CUL4A	8451	ENSG00000139842	113862552	113919399	1	protein_coding	cullin 4A [Source:HGNC Symbol;Acc:2554]
STAT5.AAA-3.smooth.chr13.cher27	AAA	13	114902922	114903544	STAT5.AAA-3 smooth	1.56559	1.2625	RASA3	22821	ENSG00000185989	114747194	114898086	-1	protein_coding	RAS p21 protein activator 3 [Source:HGNC Symbol;Acc:20331]
STAT5.AAA-3.smooth.chr14.cher1	AAA	14	20925158	20925762	STAT5.AAA-3 smooth	1.68822	1.45336	OSGEP	55644	ENSG00000092094	20914570	20923264	-1	protein_coding	O-sialoglycoprotein endopeptidase [Source:HGNC Symbol;Acc:18028]
STAT5.AAA-3.smooth.chr14.cher1	AAA	14	20925158	20925762	STAT5.AAA-3 smooth	1.68822	1.45336	APEX1	328	ENSG00000100823	20923350	20925927	1	protein_coding	APEX nuclease (multifunctional DNA repair enzyme) 1 [Source:HGNC Symbol;Acc:587]
STAT5.AAA-3.smooth.chr14.cher2	AAA	14	22502084	22502586	STAT5.AAA-3 smooth	1.47861	0.48585	TRAV20	NA	ENSG00000211800	22508840	22509399	1	TR_V_gene	T cell receptor alpha variable 20 [Source:HGNC Symbol;Acc:12117]
STAT5.AAA-3.smooth.chr14.cher3	AAA	14	23507908	23508402	STAT5.AAA-3 smooth	1.66036	1.6256	PSMB5	5693	ENSG00000100804	23485752	23504439	-1	protein_coding	proteasome (prosome, macropain) subunit, beta type, 5 [Source:HGNC Symbol;Acc:9542]
STAT5.AAA-3.smooth.chr14.cher3	AAA	14	23507908	23508402	STAT5.AAA-3 smooth	1.66036	1.6256	PSMB11	122706	ENSG00000222028	23511376	23513269	1	protein_coding	proteasome (prosome, macropain) subunit, beta type, 11 [Source:HGNC Symbol;Acc:31963]
STAT5.AAA-3.smooth.chr14.cher3	AAA	14	23507908	23508402	STAT5.AAA-3 smooth	1.66036	1.6256	AL132780.1	NA	ENSG00000207765	23502739	23502847	-1	miRNA
STAT5.AAA-3.smooth.chr14.cher4	AAA	14	23657972	23658679	STAT5.AAA-3 smooth	2.02514	4.33166	SLC7A8	23428	ENSG00000092068	23594504	23652883	-1	protein_coding	solute carrier family 7 (amino acid transporter light chain, L system), member 8 [Source:HGNC Symbol;Acc:11066]
STAT5.AAA-3.smooth.chr14.cher5	AAA	14	23659211	23659719	STAT5.AAA-3 smooth	1.95335	2.45288	SLC7A8	23428	ENSG00000092068	23594504	23652883	-1	protein_coding	solute carrier family 7 (amino acid transporter light chain, L system), member 8 [Source:HGNC Symbol;Acc:11066]
STAT5.AAA-3.smooth.chr14.cher6	AAA	14	23822608	23823514	STAT5.AAA-3 smooth	1.66261	2.1691	RP11-124D2.3	NA	ENSG00000259018	23825615	23826212	1	antisense
STAT5.AAA-3.smooth.chr14.cher6	AAA	14	23822608	23823514	STAT5.AAA-3 smooth	1.66261	2.1691	SLC22A17	51310	ENSG00000092096	23815515	23822121	-1	protein_coding	solute carrier family 22, member 17 [Source:HGNC Symbol;Acc:23095]
STAT5.AAA-3.smooth.chr14.cher7	AAA	14	24402203	24402703	STAT5.AAA-3 smooth	1.55757	1.16106	AL136419.1	NA	ENSG00000197775	24407940	24409196	1	protein_coding	Uncharacterized protein C14orf167 [Source:UniProtKB/Swiss-Prot;Acc:Q9P1J3]
STAT5.AAA-3.smooth.chr14.cher7	AAA	14	24402203	24402703	STAT5.AAA-3 smooth	1.55757	1.16106	C14orf165	NA	ENSG00000259334	24391456	24403777	-1	processed_transcript	chromosome 14 open reading frame 165 [Source:HGNC Symbol;Acc:23167]
STAT5.AAA-3.smooth.chr14.cher8	AAA	14	24561892	24562562	STAT5.AAA-3 smooth	1.69821	2.60212	PCK2	5106	ENSG00000100889	24563262	24579807	1	protein_coding	phosphoenolpyruvate carboxykinase 2 (mitochondrial) [Source:HGNC Symbol;Acc:8725]
STAT5.AAA-3.smooth.chr14.cher8	AAA	14	24561892	24562562	STAT5.AAA-3 smooth	1.69821	2.60212	NRL	4901	ENSG00000129535	24549316	24584223	-1	protein_coding	neural retina leucine zipper [Source:HGNC Symbol;Acc:8002]
STAT5.AAA-3.smooth.chr14.cher9	AAA	14	24765590	24766390	STAT5.AAA-3 smooth	1.59727	1.93015	DHRS1	115817	ENSG00000157379	24759804	24769039	-1	protein_coding	dehydrogenase/reductase (SDR family) member 1 [Source:HGNC Symbol;Acc:16445]
STAT5.AAA-3.smooth.chr14.cher9	AAA	14	24765590	24766390	STAT5.AAA-3 smooth	1.59727	1.93015	C14orf21	161424	ENSG00000196943	24769068	24778330	1	protein_coding	chromosome 14 open reading frame 21 [Source:HGNC Symbol;Acc:19826]
STAT5.AAA-3.smooth.chr14.cher10	AAA	14	31093477	31094256	STAT5.AAA-3 smooth	1.54329	0.977427	SCFD1	23256	ENSG00000092108	31091318	31205018	1	protein_coding	sec1 family domain containing 1 [Source:HGNC Symbol;Acc:20726]
STAT5.AAA-3.smooth.chr14.cher11	AAA	14	34934304	34934910	STAT5.AAA-3 smooth	1.66312	2.07641	EGLN3	112399	ENSG00000129521	34393437	34931980	-1	protein_coding	egl nine homolog 3 (C. elegans) [Source:HGNC Symbol;Acc:14661]
STAT5.AAA-3.smooth.chr14.cher11	AAA	14	34934304	34934910	STAT5.AAA-3 smooth	1.66312	2.07641	SPTSSA	171546	ENSG00000165389	34901995	34931562	-1	protein_coding	serine palmitoyltransferase, small subunit A [Source:HGNC Symbol;Acc:20361]
STAT5.AAA-3.smooth.chr14.cher12	AAA	14	35595259	35595738	STAT5.AAA-3 smooth	1.71256	1.64637	PPP2R3C	55012	ENSG00000092020	35554673	35591723	-1	protein_coding	protein phosphatase 2, regulatory subunit B'', gamma [Source:HGNC Symbol;Acc:17485]
STAT5.AAA-3.smooth.chr14.cher13	AAA	14	51296223	51296732	STAT5.AAA-3 smooth	1.89946	2.55671	NIN	51199	ENSG00000100503	51186481	51297839	-1	protein_coding	ninein (GSK3B interacting protein) [Source:HGNC Symbol;Acc:14906]
STAT5.AAA-3.smooth.chr14.cher14	AAA	14	52339158	52339636	STAT5.AAA-3 smooth	1.71624	1.43801	GNG2	54331	ENSG00000186469	52292913	52446060	1	protein_coding	guanine nucleotide binding protein (G protein), gamma 2 [Source:HGNC Symbol;Acc:4404]
STAT5.AAA-3.smooth.chr14.cher19	AAA	14	54319050	54319752	STAT5.AAA-3 smooth	1.97796	3.87429	AL162759.1	NA	ENSG00000235269	54235660	54317600	-1	lincRNA
STAT5.AAA-3.smooth.chr14.cher21	AAA	14	54426198	54426738	STAT5.AAA-3 smooth	1.50315	0.807695	BMP4	652	ENSG00000125378	54416454	54425479	-1	protein_coding	bone morphogenetic protein 4 [Source:HGNC Symbol;Acc:1071]
[truncated: 10,174 more rows]

## Sheet: Table S2
Table S2. List of transcription factor binding sites (TFBSs) in chers. List of transcription factor binding sites (TFBSs) in chers. The sequences of the chers were analyzed to identify potential transcription factor binding sites (TFBS) and support the evidence of TF binding from the ChIP–chip analysis. The program Ringo was used to generate a score which is the sum of the log–fold changes minus …
[truncated: 83,451 more rows]

[truncated: 9 more sheets: Table S3, Table S4, Table S5, Table S6, Table S7, Table S8, Table S9, Table S10, Table S11]
